# Supplementary material for: Comparative Transcriptome Analysis of Leaves and Roots in Response to Sudden Increase in Salinity in Brassica napus by RNA-seq
Source: Biomed Res Int. 2014 Aug 7;2014:467395. doi: 10.1155/2014/467395 (PMC4142189; doi:10.1155/2014/467395)
Supplement: Supplementary file 1 — is primer pair for qRT-PCR analysis. Supplementary file 2 indicates expression fold change of salt responsive gene markers in B. napus. Supplementary file 3 and 4 are tables indicating summary of sequencing output and statistics for the unigene of B. napus assembled by SOAPdenovo, respectively. Supplementary file 5 reveals annotations of all-unigenes. Supplementary file 6 is a graph depicting length distribution of the all-unigenes with SwissProt or NR annotations. Supplementary file 7 and 8 are GO and KEGG ontology classifications of all-unigenes, respectively. Supplementary file 9 shows comparison of transcription factor families between B. napus, Arabidopsis and B. rapa. Supplementary file 10 indicates log2 fold-changes of DEGs in the leaves and the roots at 1h and 12h. Supplementary file 11 shows Venn diagrams depicting number of DEGs regulated in the leaves and the roots of B. napus. Supplementary file 12 shows the result of validation of DEGs by semi-qRT-PCR. Supplementary file 13 shows the comparison of expression fold-change for DEGs between N119 and Kirariboshi. Supplementary file 14 lists all over-represented GO terms in DEGs. Supplementary file 15, 16 and 17 indicate comparison of over-represented GO terms of “Biological Process”, “Molecular Function”, and “Cellular Component”, respectively in the leaves and the roots at 1h and 12h after stress. Supplementary file 18 lists all over-represented KEGG ontology in DEGs. [file 467395.f1.zip › 467395.f1/Additional file 1.xlsx]

## Sheet: Sheet1
Additional file 1: Primer pairs for qRT-PCR analysis
all-unigene ID	Annotation description	Sense primer sequence	Anti-sense primer sequence
AF111812a	Actin	GTGATGAAGCTCAGTCCAAGAGAGG	TCGTTGTAGAAAGTGTGATGCCAGA
AY293830a	BnBDC1	TACCAAACACTCCCATACCAAACTC	GTTCACGCCTCCTTTCCCTAC
AY572958a	BnLEA4	ATGAGGCTGAGATGCAGAAGAGAG	AGTAGCGGTTCCCATTCCCAAA
AY642433a	BnMPK3	GCTAGACCCACTTCAGAGAACGA	GCTCCATAAAGATACAACCAACAGACC
JF957836a	BnNAC2	ACCATGCCCTGTCTCGATCATA	GTTTGGATACTTCCGGTCTCTTGG
all-unigene009108	Nitrate transporter 1.7	GCTCTCGCCGCAGCTTATTC	TGAACCGTCGTCACAATCAAACTAC
all-unigene012939	Bile acid:sodium symporter family protein	AATGGAAACATTAAAGCAAGCCAAC	GTGAAAGAAGGTGGATGGAGAAGA
all-unigene019693	LSU2 (Response to low sulfur 2)	TGGAGGAAATGAGGAGAGAGATGTT	AGGAAGAGGATGCGAGATTGGT
all-unigene021932	ANAC019	TGAGTATCGTCTCCTTGAACCCTCT	TTTGTGCGCTTGATTGCTTCTTGT
all-unigene023988	S-adenosyl-L-methionine:carboxyl methyltransferase	CAACTTCCCAATCTATCCGGCAC	AACGCTTCTATCGTGAAACACCC
all-unigene024479	Glucose-6-phosphate transmembrane transporter	TGATTGGGTTTATGGGAGCGA	GACTTCCCTTTCATCCCTTTCTTTG
all-unigene025196	Phosphate transporter 1.4	TGTTGCCTTCTGTGGAACCCT	GAGCAAAGGACCATGACCATCAAC
all-unigene026975	Cinnamate-4-hydroxylase	CCAGAGCAAGCTAAGGAACGAAA	TGAGGCACGAGGAGAGGAAC
all-unigene027620	Unknown protein	AGTTACATTTCCTTCATCGTGTTGCT	TGGCCTGACTTATTGGATACCCTT
all-unigene028291	Unknown protein	ATAGGAAGAGGAGATGACAGGATTG	AAAGATTGGAGGAAGGAGGTTGATG
all-unigene037488	Soybean gene regulated by COLD-2	AAGCAGAAGACAAAGGTGGACAAAG	CTGGATGACAAGTGTGAGATGGTTC
all-unigene037879	Germin-like protein 1	CAAATGCTATAAACGGTATGACCAACAC	GATACTTGGGACTCATTGGCACTTT
all-unigene038146	Germin 3	TAGTCATACAAGGAACCATCTGCG	AGGAAACACCATAGAATCACCTCTC
all-unigene041077	HMT3 (Homocysteine S-methyltransferase 3)	TGCCTCATTACTTCTCCTCACCTC	AAACTCTCCGCTTCTCCCACC
all-unigene042412	RS5 (Raffinose synthase 5)	CTCCTGACATGGCGAATGAGTTT	TATTTCTCGCACAACATCTCCAGT
all-unigene046879	KEA4 (K+ efflux affinity 4)	TCATTACTGGGTATCTATTGGCGGG	TTTCAACCTGCACCATTTCGCT
all-unigene047929	Cadmium-transporting ATPase	TTGATGGAGTTGTTGTGGATGGAAA	ACAGTTGAATCTCTCAGTTTAGGCAC
all-unigene056933	PQ-loop repeat family protein / transmembrane family protein	TCAGTTCTACACAGCCTTGCTTTAC	GGTCTCTTCTCTTCATCTTCTTCATCC
all-unigene060898	Expansin A 10	GTAAATGGTGTCTCCCTGGCTCAA	ATTGTTGTTAGGTAAGGCGTTGTTTGG
all-unigene079197	HKT1 (High-affinity K+ Transporter 1)	GATAAGATCACGAAGCGCGAGG	CAAGAAGAACACAAAGACGAAGGGA
all-unigene105533	12-oxophytodienoate reductase	AATCAGGAGACACAAACCCACAAG	GAGGACACTCTGTTACTTCACCCA
all-unigene107526	RNS1 (Ribonuclease 1)	GGAACACGAATGGGAGAAGCAC	AAGGCCAAGAGAGGTTTGGAAATAC
all-unigene108137	AOC2 (Allen oxide cyclase 2)	ACATTCGTAGAACTCAACTCACTCAC	TTGTCGTAGAGATGGATTGGAGAGA
all-unigene108630	AOX3 (Alternative oxidase 3)	TACGAACGGGCGATTGTGTTTG	GTGATACGATGAGCAAGTTTGGGAG
all-unigene113339	MATE efflux protein-related	CGCAAATGAAGCAATCTCAATAGCAAG	CGAAAGAGCGAAAGTAAAGGAGGAG
all-unigene113449	CYP72A15	GTCTCCTTCTTTCCCTTTGCTTGG	GCCATTGCCATCTTTGCCTCT
all-unigene126147	VQ motif-containing protein	TGAAACTAAGCCACTACTCAAGGT	AAACGAGATGATGAAGGAGACAGA
all-unigene127840	Unknow protein	TCAAACTCCACCACCGATACTCC	TTCTCTTTCCCGTTCCCTTTCGT
all-unigene131848	Polyketide cyclase/dehydrase	GACCGAGGAAATGGAGGTGAGAA	TAGAAGAACCGCAGGAGGAACAAA
all-unigene133442	Ureide permease 5 (Allantoin uptake transmembrane transporter)	TTACCTAAATGACTGGAACGGGAGA	TGAACTGAAGACCATTACCAAACCC
all-unigene134663	O-methyltransferase	CTTTGTTGGACCGTATGCTTCGT	CAGCTTTGTAAACCCTCTCACCATC
all-unigene135195	Iron regulated transporter 3	ACTCATTGGGAGAAACCGCC	GTTGTTCAAAGCCTCAGTGCC
all-unigene137387	Sugar transporter	AAGAACCGAAACGACATCAACGAG	AACCAAAGCAGAAAGAGCCACAAA
all-unigene147714	NHL-25 (NDR1/HIN1-like 25 )	CAGTTTAATGGCGACACTGCAAGA	TCAACGGATACACCACACCTCAC
all-unigene150900	NAD(P)-linked oxidoreductase	ATTCCTTGACACCTCCGACTTCTAC	ACTTTCTCCCTCAAACCATCTTCCA
all-unigene151358	YLS9 (Yellow-leaf-specific gene 9)	CTATCAAGGACACAAGAACACGACC	TCCTCGTTGTAAGTCCGTAACTCTC
all-unigene152743	PMAT1 (Phenolic glucoside malonyltransferase 1)	CGGCAAAGAACCAGACAACCC	TCACGAGAGAGATCGAAAGTGAACC
all-unigene155229	alpha/beta-Hydrolase	ATCCGTATTGTAAACCGGCGAAG	ATCTCTCTATCCATCAGCACATCCA
all-unigene161365	Nuclear transport factor 2	GAGCTATGTCTTTCTCTGGGAGGT	GCGTTAGGTTTGCTGTCCGT
all-unigene161368	NAD(P)-binding Rossmann-fold superfamily protein	AACTGTGTACTCTTTGTTTGATGCC	GTATGCTCTATTGTTGGCTTTGACC
