# Supplementary material for: Comparative Transcriptome Analysis of Leaves and Roots in Response to Sudden Increase in Salinity in Brassica napus by RNA-seq
Source: Biomed Res Int. 2014 Aug 7;2014:467395. doi: 10.1155/2014/467395 (PMC4142189; doi:10.1155/2014/467395)
Supplement: Supplementary file 1 — is primer pair for qRT-PCR analysis. Supplementary file 2 indicates expression fold change of salt responsive gene markers in B. napus. Supplementary file 3 and 4 are tables indicating summary of sequencing output and statistics for the unigene of B. napus assembled by SOAPdenovo, respectively. Supplementary file 5 reveals annotations of all-unigenes. Supplementary file 6 is a graph depicting length distribution of the all-unigenes with SwissProt or NR annotations. Supplementary file 7 and 8 are GO and KEGG ontology classifications of all-unigenes, respectively. Supplementary file 9 shows comparison of transcription factor families between B. napus, Arabidopsis and B. rapa. Supplementary file 10 indicates log2 fold-changes of DEGs in the leaves and the roots at 1h and 12h. Supplementary file 11 shows Venn diagrams depicting number of DEGs regulated in the leaves and the roots of B. napus. Supplementary file 12 shows the result of validation of DEGs by semi-qRT-PCR. Supplementary file 13 shows the comparison of expression fold-change for DEGs between N119 and Kirariboshi. Supplementary file 14 lists all over-represented GO terms in DEGs. Supplementary file 15, 16 and 17 indicate comparison of over-represented GO terms of “Biological Process”, “Molecular Function”, and “Cellular Component”, respectively in the leaves and the roots at 1h and 12h after stress. Supplementary file 18 lists all over-represented KEGG ontology in DEGs. [file 467395.f1.zip › 467395.f1/Additional file 3.xlsx]

## Sheet: Sheet1
Additional file 3: Summary of sequencing output
Sample	Read number	Total nucleotides (nt)	Q20 number	Q20 percentage	N percentage	GC percentage
BnLc, 1 hour	25589476	4606105680	4488074720	0.9744	0	0.4865
BnLs, 1 hour	26144384	4705989120	4594002146	0.9762	0	0.4842
BnLc, 12 hour	26895193	4841134740	4728040627	0.9766	0	0.4877
BnLs, 12 hour	26405561	4753000980	4642421406	0.9767	0	0.4873
BnRc, 1 hour	27039480	4867106400	4755511556	0.9771	0	0.483
BnRs, 1 hour	26225610	4720609800	4614116178	0.9774	0	0.4842
BnRc, 12 hour	26615049	4790708820	4618923792	0.9641	0	0.4812
BnRs, 12 hour	26973497	4855229460	4733617420	0.975	0	0.4636
