# Supplementary material for: Comparative Transcriptome Analysis of Leaves and Roots in Response to Sudden Increase in Salinity in Brassica napus by RNA-seq
Source: Biomed Res Int. 2014 Aug 7;2014:467395. doi: 10.1155/2014/467395 (PMC4142189; doi:10.1155/2014/467395)
Supplement: Supplementary file 1 — is primer pair for qRT-PCR analysis. Supplementary file 2 indicates expression fold change of salt responsive gene markers in B. napus. Supplementary file 3 and 4 are tables indicating summary of sequencing output and statistics for the unigene of B. napus assembled by SOAPdenovo, respectively. Supplementary file 5 reveals annotations of all-unigenes. Supplementary file 6 is a graph depicting length distribution of the all-unigenes with SwissProt or NR annotations. Supplementary file 7 and 8 are GO and KEGG ontology classifications of all-unigenes, respectively. Supplementary file 9 shows comparison of transcription factor families between B. napus, Arabidopsis and B. rapa. Supplementary file 10 indicates log2 fold-changes of DEGs in the leaves and the roots at 1h and 12h. Supplementary file 11 shows Venn diagrams depicting number of DEGs regulated in the leaves and the roots of B. napus. Supplementary file 12 shows the result of validation of DEGs by semi-qRT-PCR. Supplementary file 13 shows the comparison of expression fold-change for DEGs between N119 and Kirariboshi. Supplementary file 14 lists all over-represented GO terms in DEGs. Supplementary file 15, 16 and 17 indicate comparison of over-represented GO terms of “Biological Process”, “Molecular Function”, and “Cellular Component”, respectively in the leaves and the roots at 1h and 12h after stress. Supplementary file 18 lists all over-represented KEGG ontology in DEGs. [file 467395.f1.zip › 467395.f1/Additional file 4.xlsx]

## Sheet: Sheet1
Additional file 4: Statistics for the unigene of B. napus assembled by SOAPdenovo.
Length of unigenes (bp)	Number of unigenes
	Leaf (1hr, 0mM)	Leaf (1hr, 200mM)	Leaf (12hr, 0mM)	Leaf (12hr, 200mM)	Root (1hr, 0mM)	Root (1hr, 200mM)	Root (12hr, 0mM)	Root (12hr, 200mM)	all-unigene
200–500	69079	66642	72001	71442	86310	85217	83377	78703	129719
500–1000	18156	19012	20159	20114	22003	22354	22486	20654	46400
1000–1500	2768	3304	3508	3596	3367	3531	3550	3364	11323
1500–2000	578	750	743	820	633	725	777	649	2761
>2000	192	254	285	303	209	257	299	232	1034
Total unigenes	90773	89962	96696	96275	112522	112084	110489	103602	191237
Mean length (bp)	419.3	435.8	432.4	435.6	413.5	419.2	424.1	420.8	506
N50 (bp)	454	481	476	482	449	457	457	458	592
Total length (bp)	38058383	39202031	41813937	41936250	46529532	46989939	46859205	43599034	87646464
