# Supplementary material for: Comparative Transcriptome Analysis of Leaves and Roots in Response to Sudden Increase in Salinity in Brassica napus by RNA-seq
Source: Biomed Res Int. 2014 Aug 7;2014:467395. doi: 10.1155/2014/467395 (PMC4142189; doi:10.1155/2014/467395)
Supplement: Supplementary file 1 — is primer pair for qRT-PCR analysis. Supplementary file 2 indicates expression fold change of salt responsive gene markers in B. napus. Supplementary file 3 and 4 are tables indicating summary of sequencing output and statistics for the unigene of B. napus assembled by SOAPdenovo, respectively. Supplementary file 5 reveals annotations of all-unigenes. Supplementary file 6 is a graph depicting length distribution of the all-unigenes with SwissProt or NR annotations. Supplementary file 7 and 8 are GO and KEGG ontology classifications of all-unigenes, respectively. Supplementary file 9 shows comparison of transcription factor families between B. napus, Arabidopsis and B. rapa. Supplementary file 10 indicates log2 fold-changes of DEGs in the leaves and the roots at 1h and 12h. Supplementary file 11 shows Venn diagrams depicting number of DEGs regulated in the leaves and the roots of B. napus. Supplementary file 12 shows the result of validation of DEGs by semi-qRT-PCR. Supplementary file 13 shows the comparison of expression fold-change for DEGs between N119 and Kirariboshi. Supplementary file 14 lists all over-represented GO terms in DEGs. Supplementary file 15, 16 and 17 indicate comparison of over-represented GO terms of “Biological Process”, “Molecular Function”, and “Cellular Component”, respectively in the leaves and the roots at 1h and 12h after stress. Supplementary file 18 lists all over-represented KEGG ontology in DEGs. [file 467395.f1.zip › 467395.f1/Additional file 5.xlsx]

## Sheet: 1
Additional file 5.1: Complete list of all-unigenes with SwissProt or NR annotations
Query ID	Query length	Subject ID	Subject annotation	E-value	Similarity	Score	Alignment length
all-unigene000003	344	gi|482571333	glycine-rich protein	9.15122e-20	73	90.5077	94
all-unigene000004	280	gi|75318755	lrk44_arath ame: full=l-type lectin-domain containing receptor kinase short= - flags: precursor	3.4929e-10	87	63.5438	40
all-unigene000006	409	gi|75171473	pp440_arath ame: full=pentatricopeptide repeat-containing protein at5g61400	1.00448e-17	71	88.5817	78
all-unigene000008	343	gi|261260065	kraf1_caebr ame: full=raf homolog serine threonine-protein kinase ame: full=abnormal cell lineage protein 45	1e-05	48	33.4982	84
all-unigene000010	329	gi|74996890	lvsf_dicdi ame: full=beach domain-containing protein lvsf	1e-05	47	34.6538	72
all-unigene000012	288	gi|300681242	ma655_arath ame: full=65-kda microtubule-associated protein 5 short= 65-5	1e-05	60	33.113	48
all-unigene000013	902	gi|10720366	ch10_bachd ame: full=10 kda chaperonin ame: full= protein ame: full=protein cpn10	1e-05	59	34.6538	57
all-unigene000015	1047	gi|75206916	y3028_arath ame: full=uncharacterized acetyltransferase at3g50280	3.00293e-91	73	335.495	312
all-unigene000016	424	gi|75206916	y3028_arath ame: full=uncharacterized acetyltransferase at3g50280	3.27715e-11	64	67.0106	78
all-unigene000018	1463	gi|75219151	bzp10_arath ame: full=basic leucine zipper 10 short= 10 short=bzip protein 10 ame: full=basic leucine zipper opaque 2 homolog 1 short=basic leucine zipper o2 homolog 1	3.12379e-135	71	482.256	426
all-unigene000019	233	gi|75337370	prs4b_arath ame: full=26s proteasome regulatory subunit 4 homolog b ame: full=26s proteasome aaa-atpase subunit rpt2b ame: full=26s proteasome subunit 4 homolog b ame: full=regulatory particle triple-a atpase subunit 2b	3.78209e-12	87	70.0922	40
all-unigene000020	257	gi|18643963	reverse transcriptase	2.61221e-07	74	53.1434	50
all-unigene000022	709	gi|259511444	slx1_penmq ame: full=structure-specific endonuclease subunit slx1	2.33845e-13	48	75.8702	135
all-unigene000023	218	gi|482562306	sac3 ganp family protein	4.96798e-16	97	81.2629	41
all-unigene000027	207	gi|75273549	drb3_arath ame: full=double-stranded rna-binding protein 3 ame: full=dsrna-binding protein 3 short= 3	9.44238e-32	98	135.191	69
all-unigene000028	309	gi|50400256	cdc6_mouse ame: full=cell division control protein 6 homolog ame: full=cdc6-related protein ame: full=p62	8.08725e-15	63	78.9518	102
all-unigene000030	381	gi|75273243	aspg2_arath ame: full=protein aspartic protease in guard cell 2 short= 2 flags: precursor	3.04002e-06	55	50.447	70
all-unigene000032	297	gi|297814390	hypothetical protein ARALYDRAFT_322499	1.73611e-20	65	89.3521	86
all-unigene000034	233	gi|482553345	hypothetical protein CARUB_v10005889mg	4.63136e-13	94	69.3218	38
all-unigene000035	223	gi|117765	cy11_soltu ame: full=cytochrome c1- heme mitochondrial ame: full=complex iii subunit 4-1 ame: full=complex iii subunit iv-1 ame: full=cytochrome b-c1 complex subunit 4-1 ame: full=ubiquinol-cytochrome-c reductase complex cytochrome c1 subunit 1 short=cytochrome c-1-1 flags: precursor	1e-05	36	37.3502	74
all-unigene000036	770	gi|257096634	fbd32_arath ame: full=fbd-associated f-box protein at5g22730	5.34383e-62	77	237.654	196
all-unigene000037	495	gi|75337880	crk40_arath ame: full=cysteine-rich receptor-like protein kinase 40 short=cysteine-rich rlk40 flags: precursor	4.82602e-46	87	183.341	119
all-unigene000038	462	gi|15222880	rna-directed dna polymerase (reverse transcriptase)-related family protein	2.12592e-07	70	54.299	47
all-unigene000040	1039	gi|322510084	y2910_arath ame: full= gamma-glutamylcyclotransferase at3g02910	3.39098e-87	88	322.013	190
all-unigene000041	434	gi|68565642	pcp_mouse ame: full=lysosomal pro-x carboxypeptidase ame: full=proline carboxypeptidase ame: full=prolylcarboxypeptidase short=prcp flags: precursor	1.06154e-31	63	135.191	136
all-unigene000044	936	gi|482572120	hypothetical protein CARUB_v10010615mg	5.81933e-24	60	104.375	115
all-unigene000043	441	gi|75170647	kcbp_arath ame: full=kinesin-like calmodulin-binding protein ame: full=protein zwichel	3.49334e-09	67	60.4622	46
all-unigene000045	234	gi|75262663	bxl4_arath ame: full=beta-d-xylosidase 4 short= 4 flags: precursor	6.66056e-17	77	85.8853	62
all-unigene000046	230	gi|75328912	di192_arath ame: full=protein dehydration-induced 19 homolog 2 short= i19-2	1e-05	56	35.8094	37
all-unigene000052	372	gi|30173131	grau_drome ame: full=transcription factor grauzone	1e-05	45	35.039	64
all-unigene000050	803	gi|425906067	brdt_macfa ame: full=bromodomain testis-specific protein	1e-05	54	37.3502	66
all-unigene000057	490	gi|84029371	nhx8_arath ame: full=sodium hydrogen exchanger 8 ame: full=na(+) h(+) exchanger 8 short=nhe-8 ame: full=protein salt overly sensitive 1b	4.34561e-52	95	203.371	112
all-unigene000058	381	gi|25090938	papss_ureca ame: full=bifunctional 3 -phosphoadenosine 5 -phosphosulfate synthase short=paps synthase short=papss ame: full=sulfurylase kinase short=sk includes: ame: full=sulfate adenylyltransferase ame: full=atp-sulfurylase ame: full=sulfate adenylate transferase short=sat includes: ame: full=adenylyl-sulfate kinase ame: full=3 -phosphoadenosine-5 -phosphosulfate synthase ame: full=aps kinase a…	1e-05	45	33.113	88
all-unigene000059	306	gi|357478013	hypothetical protein MTR_4g114100	5.19527e-06	68	52.7582	50
all-unigene000063	224	gi|172044680	dyh2_human ame: full=dynein heavy chain axonemal ame: full=axonemal beta dynein heavy chain 2 ame: full=ciliary dynein heavy chain 2 ame: full=dynein heavy chain domain-containing protein 3	1e-05	54	34.2686	55
all-unigene000066	601	gi|397490281	PREDICTED: uncharacterized protein LOC100978470	3.58176e-64	99	207.608	100
all-unigene000069	525	gi|75308819	g2ox7_arath ame: full=gibberellin 2-beta-dioxygenase 7 ame: full=ga 2-oxidase 7 ame: full=gibberellin 2-beta-hydroxylase 7 ame: full=gibberellin 2-oxidase 7	4.02716e-20	59	97.4413	174
all-unigene000068	1043	gi|74851109	taf1_dicdi ame: full=transcription initiation factor tfiid subunit 1	1e-05	42	36.5798	89
all-unigene000070	220	gi|75330746	rbk2_arath ame: full=receptor-like cytosolic serine threonine-protein kinase rbk2 ame: full=protein rop binding protein kinases 2	2.64114e-10	84	63.929	38
all-unigene000071	212	gi|327488374	pob1_arath ame: full=btb poz domain-containing protein pob1 ame: full=poz btb containing-protein 1 short= 1	9.1393e-19	75	92.0485	70
all-unigene000075	510	gi|18394409	af325003_1 at1g16880	1.4148e-35	74	131.724	155
all-unigene000076	438	gi|75278866	sdr3a_arath ame: full=short-chain dehydrogenase reductase 3a short= 3a	6.94157e-58	91	222.246	132
all-unigene000077	369	gi|3377824	non-ltr retroelement reverse transcriptase	5.45299e-33	72	132.109	119
all-unigene000079	342	gi|85681043	rere_rat ame: full=arginine-glutamic acid dipeptide repeats protein ame: full=atrophin-1-related protein	1.24815e-07	57	55.0694	83
all-unigene000085	515	gi|75264265	fb299_arath ame: full= f-box protein at5g62660	4.37467e-32	64	137.117	168
all-unigene000086	495	gi|15220549	adipose-regulatory protein	2.07863e-06	54	55.0694	170
all-unigene000087	462	gi|60390961	sm3l2_arath ame: full= swi snf-related matrix-associated actin-dependent regulator of chromatin subfamily a member 3-like 2 short=smarca3-like protein 2	1.19568e-21	98	102.064	54
all-unigene000088	322	gi|13878382	c71bo_arath ame: full=cytochrome p450 71b24	2.39467e-11	87	67.3958	40
all-unigene000090	441	gi|75334559	y5188_arath ame: full=probable lrr receptor-like serine threonine-protein kinase at1g51880 flags: precursor	8.80149e-45	83	178.718	118
all-unigene000092	281	gi|297839119	alpha beta-hydrolase domain-containing protein	5.09196e-41	90	147.517	86
all-unigene000093	525	gi|83305926	tmc6_mouse ame: full=transmembrane channel-like protein 6	1e-05	55	34.2686	54
all-unigene000094	323	gi|75219581	y2317_arath ame: full=probable leucine-rich repeat receptor-like protein kinase at2g33170 flags: precursor	6.08962e-15	58	79.337	103
all-unigene000096	253	gi|297797890	kinesin-related protein	4.87143e-20	94	93.2041	84
all-unigene000097	370	gi|75277347	chx13_arath ame: full=cation h(+) symporter 13 ame: full=protein cation h+ exchanger 13 short= 13	5.01788e-41	75	166.007	123
all-unigene000098	364	gi|297838709	atp synthase subunit beta	1.52125e-51	95	176.407	119
all-unigene000099	279	gi|209572798	u2a2b_arath ame: full=splicing factor u2af large subunit b ame: full=u2 auxiliary factor 65 kda subunit b ame: full=u2 small nuclear ribonucleoprotein auxiliary factor large subunit b short=u2 snrnp auxiliary factor large subunit b	1e-05	52	34.6538	75
all-unigene000100	215	gi|130582	polx_tobac ame: full=retrovirus-related pol polyprotein from transposon tnt 1-94 includes: ame: full=protease includes: ame: full=reverse transcriptase includes: ame: full=endonuclease	5.91973e-10	64	62.7734	70
all-unigene000102	932	gi|1168468	apex1_rat ame: full=dna-(apurinic or apyrimidinic site) lyase ame: full=apex nuclease short=apen ame: full=apurinic-apyrimidinic endonuclease 1 short=ap endonuclease 1 ame: full=ref-1 ame: full=redox factor-1 contains: ame: full=dna-(apurinic or apyrimidinic site) mitochondrial	1e-05	42	35.4242	121
all-unigene000103	363	gi|378548266	aee19_arath ame: full= acyl-activating enzyme 19	3.18361e-32	72	136.732	115
all-unigene000104	540	gi|89257547	tpa_exp: transposase	2.95925e-17	65	86.2705	90
all-unigene000105	473	gi|12643746	agl12_arath ame: full=agamous-like mads-box protein agl12	5.64891e-46	98	182.956	93
all-unigene000107	1241	gi|172044784	pub35_arath ame: full=u-box domain-containing protein 35 ame: full=plant u-box protein 35 includes: ame: full=e3 ubiquitin ligase includes: ame: full=serine threonine-protein kinase	2.70997e-12	38	73.559	442
all-unigene000112	348	gi|4006833	non-ltr retroelement reverse transcriptase	2.96702e-43	78	161.384	115
all-unigene000113	323	gi|12230491	pfdb_sulso ame: full=prefoldin subunit beta ame: full= subunit beta	1e-05	55	34.6538	70
all-unigene000114	526	gi|229485854	cwc22_caebr ame: full=pre-mrna-splicing factor cwc22 homolog ame: full=lethal protein 858 ame: full=nucampholin	1e-05	39	33.8834	114
all-unigene000116	247	gi|482558977	cysteine histidine-rich c1 domain-containing protein	2.64033e-09	59	61.6178	81
all-unigene000123	257	gi|353678136	tic32_arath ame: full=short-chain dehydrogenase tic chloroplastic ame: full=translocon at the inner envelope membrane of chloroplasts 32 short= 32	4.66653e-07	63	53.1434	73
all-unigene000122	276	gi|75287865	efts_arath ame: full=elongation factor mitochondrial short=ef-ts short=ef- t flags: precursor	2.32876e-38	91	157.147	91
all-unigene000124	355	gi|41017516	rimb2_rat ame: full=rims-binding protein 2 short=rim-bp2	1e-05	46	33.4982	67
all-unigene000126	368	gi|74853510	odba_dicdi ame: full=2-oxoisovalerate dehydrogenase subunit mitochondrial ame: full=branched-chain alpha-keto acid dehydrogenase e1 component alpha chain short=bckde1a short=bckdh e1-alpha flags: precursor	1e-05	60	37.7354	43
all-unigene000129	530	gi|205412991	ycf2_lobma ame: full=protein ycf2	2.01293e-99	100	360.918	176
all-unigene000128	250	gi|6685411	erg11_brana ame: full=squalene monooxygenase ame: full=squalene epoxidase short=se	4.66343e-31	79	132.88	83
all-unigene000130	442	gi|205412982	ycf2_lepvr ame: full=protein ycf2	2.53719e-76	97	283.493	145
all-unigene000132	285	gi|12321503	non-ltr retrotransposon reverse transcriptase-like protein	7.25971e-16	72	81.6481	58
all-unigene000134	299	gi|205828971	ubc26_arath ame: full=probable ubiquitin-conjugating enzyme e2 26 ame: full=ubiquitin carrier protein 26	1.87081e-24	90	110.923	73
all-unigene000137	222	gi|110737450	retrotransposon like protein	3.35852e-13	66	61.6178	51
all-unigene000139	654	gi|75338652	plrx3_arath ame: full=pollen-specific leucine-rich repeat extensin-like protein 3 short= 3 short=pollen-specific lrr extensin3 ame: full=cell wall hydroxyproline-rich glycoprotein flags: precursor	5.22583e-78	84	290.426	175
all-unigene000140	267	gi|482562687	fad-binding and bbe domain-containing protein	2.29953e-37	98	140.198	76
all-unigene000141	281	gi|3024551	rlm1_yeast ame: full=transcription factor rlm1	1e-05	54	35.039	64
all-unigene000144	239	gi|384955748	nrps3_aspfu ame: full=nonribosomal peptide synthetase 3 ame: full=siderophore peptide synthase e	1e-05	60	33.113	38
all-unigene000148	447	gi|75264269	bag7_arath ame: full=bag family molecular chaperone regulator 7 ame: full=bcl-2-associated athanogene 7	1.47717e-55	83	214.542	149
all-unigene000150	371	gi|42573569	uncharacterized protein	1.83677e-39	90	137.887	98
all-unigene000152	281	gi|152013439	crk14_arath ame: full=cysteine-rich receptor-like protein kinase 14 short=cysteine-rich rlk14 flags: precursor	6.75387e-38	86	155.606	93
all-unigene000153	465	gi|56749666	rir1_arath ame: full=ribonucleoside-diphosphate reductase large subunit ame: full=ribonucleoside-diphosphate reductase r1 subunit short= 1	2.22138e-30	77	84.3445	63
all-unigene000154	461	gi|2493319	mavi_cucpe ame: full=mavicyanin	8.58871e-12	63	69.3218	66
all-unigene000157	427	gi|146291076	yi31b_yeast ame: full=transposon ty3-i gag-pol polyprotein ame: full=gag3-pol3 ame: full=transposon ty3-2 tya-tyb polyprotein contains: ame: full=capsid protein short=ca ame: full=p24 contains: ame: full=spacer peptide p3 contains: ame: full=nucleocapsid protein p11 short=nc contains: ame: full=ty3 protease short=pr ame: full=p16 contains: ame: full=spacer peptide j contains: ame: full=reverse tr…	9.19271e-22	51	102.064	137
all-unigene000156	358	gi|13878363	c71ad_arath ame: full=indoleacetaldoxime dehydratase ame: full=cytochrome p450 71a13	2.78582e-44	86	176.792	102
all-unigene000158	670	gi|482563289	hypothetical protein CARUB_v10023617mg	9.00032e-09	77	62.7734	45
all-unigene000161	413	gi|297806589	hypothetical protein ARALYDRAFT_349841	1e-05	59	51.2174	86
all-unigene000164	572	gi|75315315	lhw_arath ame: full=transcription factor lhw ame: full=bhlh transcription factor delta short=bhlh delta ame: full=basic helix-loop-helix protein 156 short= 156 short=bhlh 156 ame: full=protein lonesome highway ame: full=bhlh transcription factor bhlh156	1e-05	56	37.7354	48
all-unigene000165	352	gi|75170829	pp414_arath ame: full=pentatricopeptide repeat-containing protein mitochondrial flags: precursor	3.08728e-59	96	226.483	117
all-unigene000166	278	gi|238479547	rna-binding asch domain protein	4.03371e-34	89	130.183	79
all-unigene000169	315	gi|75337951	crk26_arath ame: full=cysteine-rich receptor-like protein kinase 26 short=cysteine-rich rlk26 flags: precursor	1.45393e-40	90	164.466	97
all-unigene000170	684	gi|50400708	arr2_arath ame: full=two-component response regulator arr2 ame: full=receiver-like protein 5	4.36704e-14	67	78.1814	81
all-unigene000171	355	gi|18203273	gl13_arath ame: full=germin-like protein subfamily 1 member 3 flags: precursor	1e-05	46	32.3426	56
all-unigene000176	641	gi|75262477	gstt3_arath ame: full=glutathione s-transferase t3 short= 3 ame: full=gst class-theta member 3 ame: full=glutathione s-transferase 10c	3.98213e-43	63	174.481	195
all-unigene000177	476	gi|391359266	endo4_arath ame: full=endonuclease 4 short= 4 ame: full=deoxyribonuclease endo4 ame: full=single-stranded-nucleate endonuclease endo4 flags: precursor	1.08162e-60	94	231.876	113
all-unigene000180	947	gi|374253665	rlmc_actsz ame: full=23s rrna (uracil -c )-methyltransferase ame: full=23s rrna -methyltransferase	1e-05	50	34.6538	69
all-unigene000181	1095	gi|44888115	m310_arath ame: full=uncharacterized mitochondrial protein g00310 ame: full=orf154	1.72692e-44	75	180.259	146
all-unigene000182	703	gi|75248484	agub_arath ame: full=n-carbamoylputrescine amidase ame: full=nitrilase-like protein 1	7.2695e-11	80	57.7658	36
all-unigene000185	454	gi|543908	byr3_schpo ame: full=cellular nucleic acid-binding protein homolog	1e-05	31	37.7354	97
all-unigene000187	728	gi|74752879	eny2_human ame: full=enhancer of yellow 2 transcription factor homolog	4.00503e-08	75	58.5362	49
all-unigene000188	813	gi|74752879	eny2_human ame: full=enhancer of yellow 2 transcription factor homolog	5.00838e-21	77	101.679	84
all-unigene000186	214	gi|15220664	mitochondrial transcription termination factor family protein	1.30088e-19	81	89.3521	69
all-unigene000189	249	gi|297849578	protein -	4.61004e-43	92	149.443	82
all-unigene000191	347	gi|297799854	hypothetical protein ARALYDRAFT_492676	8.97319e-14	66	72.0182	90
all-unigene000190	452	gi|75097884	snc1_arath ame: full=protein suppressor of npr1- constitutive 1 short= 1 ame: full=disease resistance rpp5-like protein	2.24499e-38	78	157.532	116
all-unigene000192	484	gi|2492762	ygcw_ecoli ame: full=uncharacterized oxidoreductase	1e-05	41	33.8834	84
all-unigene000193	280	gi|223634709	sat3_arath ame: full=serine acetyltransferase mitochondrial short= -3 short= 2 2 short=sat-m flags: precursor	5.00297e-16	73	80.4925	68
all-unigene000195	403	gi|158518397	hem12_arath ame: full=glutamyl-trna reductase chloroplastic short= flags: precursor	1.24437e-07	81	55.0694	38
all-unigene000196	463	gi|75308904	h2av3_arath ame: full=probable histone h2a variant 3 ame: full= z 3 ame: full=hta9	3.44182e-45	98	180.259	94
all-unigene000197	421	gi|75308904	h2av3_arath ame: full=probable histone h2a variant 3 ame: full= z 3 ame: full=hta9	7.49606e-53	91	205.297	120
all-unigene000200	858	gi|6136523	y410_syny3 ame: full=uncharacterized protein sll0410	1e-05	47	45.8246	133
all-unigene000201	348	gi|1172873	rd21a_arath ame: full=cysteine proteinase rd21a short=rd21 flags: precursor	6.10248e-23	74	105.916	91
all-unigene000202	859	gi|89257449	cysteine-type peptidase	3.12928e-28	50	124.02	201
all-unigene000203	899	gi|374095389	fb334_arath ame: full=probable f-box protein at4g22060	1.56447e-82	66	306.22	298
all-unigene000208	259	gi|482563602	zinc finger family protein	1.85851e-28	76	112.079	86
all-unigene000210	216	gi|118573090	opd22_arath ame: full=dihydrolipoyllysine-residue acetyltransferase component 2 of pyruvate dehydrogenase mitochondrial ame: full=dihydrolipoamide s-acetyltransferase component 2 of pyruvate dehydrogenase complex ame: full=pyruvate dehydrogenase complex component e2 2 short=pdc-e2 2 short=pdce2 2 flags: precursor	3.03324e-14	100	77.0258	36
all-unigene000212	962	gi|482572554	ta11-like non-ltr retroelement protein	3.50344e-24	49	108.227	207
all-unigene000211	267	gi|75262738	npy3_arath ame: full=btb poz domain-containing protein npy3 ame: full=protein naked pins in yuc mutants 3	1.09219e-35	89	148.288	89
all-unigene000213	494	gi|332278192	mate6_arath ame: full=mate efflux family protein 6 ame: full=protein detoxification 1-like 2 ame: full=protein dtx4	3.35766e-31	90	134.035	82
all-unigene000216	352	gi|73921131	y4466_arath ame: full=zf-hd homeobox protein at4g24660 short= -22	1.50137e-13	88	74.7146	44
all-unigene000220	440	gi|75294400	spch_arath ame: full=transcription factor speechless ame: full=basic helix-loop-helix protein 98 short= 98 short=bhlh 98 ame: full=transcription factor en 19 ame: full=bhlh transcription factor bhlh098	1.31521e-40	66	164.851	139
all-unigene000219	295	gi|15219878	class-ii dahp synthetase-like protein	1.33516e-12	88	71.633	44
all-unigene000221	413	gi|297838717	camp-regulated phosphoprotein 19-related protein	5.30723e-11	73	65.0846	57
all-unigene000224	267	gi|482559868	protein	1.18567e-41	90	150.984	88
all-unigene000225	458	gi|4263060	transposon protein	2.33112e-57	80	199.904	141
all-unigene000226	257	gi|24211473	apmap_mouse ame: full=adipocyte plasma membrane-associated protein ame: full=protein dd16	1e-05	59	33.113	47
all-unigene000227	402	gi|9757913	cysteine histidine-rich c1 domain-containing protein	1.19081e-28	61	119.013	126
all-unigene000229	279	gi|218511979	chl1_debha ame: full=atp-dependent rna helicase chl1 ame: full=chromosome loss protein 1	1e-05	48	33.113	77
all-unigene000230	236	gi|42573375	wd-40 repeat family protein	1.27428e-06	54	53.5286	77
all-unigene000232	299	gi|85540676	leu3_synp6 ame: full=3-isopropylmalate dehydrogenase ame: full=3-ipm-dh ame: full=beta-ipm dehydrogenase short=imdh	3.76081e-33	81	139.813	99
all-unigene000234	235	gi|548653	rk121_arath ame: full=50s ribosomal protein l12- chloroplastic ame: full=cl12-a flags: precursor	6.88733e-06	66	49.2914	57
all-unigene000235	301	gi|297840345	mitochondrial transcription termination factor family protein	9.34679e-13	72	64.3142	48
all-unigene000240	1157	gi|387912929	marf1_human ame: full=meiosis arrest female protein 1 ame: full=limkain-b1	3.31381e-09	44	63.1586	189
all-unigene000238	741	gi|74760485	vnrl4_human ame: full= vomeronasal receptor-like protein 4 ame: full=g-protein coupled receptor gpcr23 short=hgpcr23	1e-05	51	34.6538	87
all-unigene000239	217	gi|15237716	rna-binding protein nova-2-like	1.21569e-15	63	77.411	72
all-unigene000242	1418	gi|75315911	u72d1_arath ame: full=udp-glycosyltransferase 72d1	0	87	733.406	471
all-unigene000244	282	gi|297834474	tsk-associating protein 1	1.70957e-17	88	80.4925	53
all-unigene000245	314	gi|189030421	muts2_baca2 ame: full= 2 protein	1e-05	57	32.3426	45
all-unigene000247	324	gi|158518397	hem12_arath ame: full=glutamyl-trna reductase chloroplastic short= flags: precursor	1e-05	48	32.3426	52
all-unigene000248	922	gi|257050998	baz2a_mouse ame: full=bromodomain adjacent to zinc finger domain protein 2a ame: full=transcription termination factor i-interacting protein 5 short=ttf-i-interacting protein 5 short=tip5	1e-05	45	35.039	71
all-unigene000254	256	gi|46577339	tmvrn_nicgu ame: full=tmv resistance protein n	1e-05	55	43.8986	76
all-unigene000258	275	gi|297840403	hypothetical protein ARALYDRAFT_315222	9.62342e-08	82	56.9954	34
all-unigene000260	204	gi|38604676	alx_eco57 ame: full=inner membrane protein alx	1e-05	54	32.3426	44
all-unigene000262	722	gi|17367114	atrx_caeel ame: full=transcriptional regulator atrx homolog ame: full=atp-dependent helicase xnp-1 ame: full=x-linked nuclear protein 1	6.56006e-19	50	94.3597	210
all-unigene000263	916	gi|74897247	taf11_dicdi ame: full=transcription initiation factor tfiid subunit 11	1e-05	57	36.965	47
all-unigene000265	378	gi|75099392	subl_arath ame: full=subtilisin-like protease ame: full=cucumisin-like serine protease flags: precursor	6.76522e-22	58	102.449	131
all-unigene000266	309	gi|482555492	glutaredoxin family protein	2.3806e-10	71	64.6994	66
all-unigene000268	212	gi|75206396	ndua9_arath ame: full=nadh dehydrogenase 1 alpha subcomplex subunit mitochondrial flags: precursor	2.18036e-12	67	70.8626	61
all-unigene000269	234	gi|502142448	importin subunit alpha-2	1e-05	79	45.8246	34
all-unigene000272	319	gi|75213572	tic22_arath ame: full=protein tic chloroplastic ame: full=translocon at the inner envelope membrane of chloroplasts 22 short= 22 flags: precursor	2.09516e-23	71	107.457	90
all-unigene000274	304	gi|142989615	fbd40_arath ame: full=fbd-associated f-box protein at4g10400	1.38726e-06	49	51.6026	124
all-unigene000280	263	gi|158578614	retrotransposon ty1-copia subclass	1.9763e-15	71	79.337	63
all-unigene000278	454	gi|28380144	rtf23_schpo ame: full=retrotransposable element tf2 155 kda protein type 3	2.67045e-15	53	80.8777	145
all-unigene000279	310	gi|15233271	o-glycosyl hydrolases family 17 protein	2.86977e-07	78	56.225	42
all-unigene000283	614	gi|205831380	nu214_human ame: full=nuclear pore complex protein nup214 ame: full=214 kda nucleoporin ame: full=nucleoporin nup214 ame: full=protein can	1e-05	44	36.1946	92
all-unigene000284	267	gi|325511374	y1972_arath ame: full=probable lrr receptor-like serine threonine-protein kinase at1g29720 flags: precursor	7.61649e-13	74	72.4034	59
all-unigene000285	244	gi|334302851	rlp12_arath ame: full=receptor-like protein 12 short= 12 flags: precursor	4.1301e-11	69	66.6254	55
all-unigene000287	437	gi|74871679	impa3_drome ame: full= inositol monophosphatase 3 short=imp 3 short=impase 3 ame: full=inositol-1(or 4)-monophosphatase 3 ame: full=myo-inositol monophosphatase a3	1e-05	41	33.4982	89
all-unigene000288	305	gi|55976550	csn6a_arath ame: full=cop9 signalosome complex subunit 6a short= 6a short=signalosome subunit 6a	1.20968e-18	95	91.6633	46
all-unigene000289	579	gi|297829978	At3g14190	9.0611e-31	75	120.939	112
all-unigene000290	387	gi|75216785	tpsa_arath ame: full=tricyclene chloroplastic ame: full= -beta-ocimene synthase 0e23 ame: full=myrcene synthase 1 ame: full=terpenoid synthase 10 short= 10 flags: precursor	1.09811e-40	83	164.851	115
all-unigene000292	248	gi|1173105	rns3_arath ame: full=ribonuclease 3 flags: precursor	8.58495e-09	63	58.9214	44
all-unigene000293	406	gi|410591668	fbt9_arath ame: full=probable folate-biopterin transporter chloroplastic flags: precursor	9.45823e-08	76	55.4546	43
all-unigene000294	274	gi|508718780	protein kinase-like protein	2.44845e-17	72	79.337	74
all-unigene000295	309	gi|51316111	arr5_arath ame: full=two-component response regulator arr5 ame: full=response reactor 2	7.54436e-13	100	72.4034	38
all-unigene000296	333	gi|13124684	copia_drome ame: full=copia protein ame: full=gag-int-pol protein contains: ame: full=copia vlp protein contains: ame: full=copia protease	1e-05	54	46.2098	70
all-unigene000297	665	gi|48474648	yk16_schpo ame: full= atp-dependent rna helicase	1e-05	51	33.8834	80
all-unigene000298	206	gi|122233562	xb35_arath ame: full= e3 ubiquitin-protein ligase xbat35 ame: full=ankyrin repeat domain and ring finger-containing protein xbat35 ame: full=protein xb3 homolog 5	2.2647e-17	95	87.4261	47
all-unigene000302	459	gi|21431800	p2_arath ame: full=nadp-dependent alkenal double bond reductase p2	3.37343e-53	85	206.838	135
all-unigene000311	342	gi|75097075	cle26_arath ame: full=clavata3 esr -related protein 26 contains: ame: full=cle26p flags: precursor	8.90348e-22	66	102.064	90
all-unigene000304	220	gi|15220666	mitochondrial transcription termination factor family protein	2.87814e-22	80	96.6709	72
all-unigene000305	659	gi|8843739	retroelement pol polyprotein	1.94888e-41	63	160.999	222
all-unigene000306	677	gi|75097648	pxm16_arath ame: full=zinc- peroxisomal ame: full=peroxisomal m16 protease	1e-05	47	33.8834	55
all-unigene000307	630	gi|12229670	hma5_arath ame: full= copper-transporting atpase hma5 ame: full=protein heavy metal atpase 5 ame: full= copper-transporting atpase 3	1.64741e-70	80	265.388	214
all-unigene000314	294	gi|294958217	pks3_arath ame: full=protein phytochrome kinase substrate 3	1.18225e-18	78	91.6633	69
all-unigene000315	1439	gi|45593495	mica1_human ame: full=protein-methionine sulfoxide oxidase mical1 ame: full=molecule interacting with protein 1 short=mical-1 ame: full=nedd9-interacting protein with calponin homology and lim domains	1e-05	41	37.3502	106
all-unigene000316	404	gi|75041142	srrm1_ponab ame: full=serine arginine repetitive matrix protein 1	1e-05	53	35.8094	78
all-unigene000317	205	gi|443474272	y1960_arath ame: full=probable serine threonine-protein kinase at1g09600	1.98397e-13	69	74.3294	69
all-unigene000318	792	gi|89274220	ulp1 protease family protein	4.066e-67	74	233.032	238
all-unigene000320	1029	gi|223635650	pp308_arath ame: full=pentatricopeptide repeat-containing protein mitochondrial flags: precursor	4.47666e-148	93	524.242	306
all-unigene000321	285	gi|88909230	mycpp_human ame: full=c-myc promoter-binding protein ame: full=denn domain-containing protein 4a	1e-05	48	32.3426	68
all-unigene000322	343	gi|72255605	117M18_4	1.02542e-22	98	99.7525	114
all-unigene000323	305	gi|1717772	tnnt2_rat ame: full=troponin cardiac muscle short= c ame: full=cardiac muscle troponin t short=c	1e-05	60	36.1946	40
all-unigene000324	584	gi|5921925	c78a4_pinra ame: full=cytochrome p450 78a4	9.9138e-32	66	136.346	159
all-unigene000325	412	gi|20139278	pldg1_arath ame: full=phospholipase d gamma 1 short= gamma1 short=pld gamma 1 ame: full=choline phosphatase ame: full=lecithinase d ame: full=lipophosphodiesterase ii	3.43162e-26	92	116.701	63
all-unigene000326	302	gi|240254276	cation exchanger 6	2.24978e-10	85	65.0846	35
all-unigene000328	814	gi|482563500	ribonuclease h-like protein	2.07962e-16	47	85.1149	230
all-unigene000333	670	gi|5921925	c78a4_pinra ame: full=cytochrome p450 78a4	1.88956e-62	67	238.81	222
all-unigene000334	245	gi|15220740	est gb	2.66026e-18	65	84.7297	84
all-unigene000338	450	gi|75333956	agl80_arath ame: full=agamous-like mads-box protein agl80	2.3659e-08	47	57.7658	106
all-unigene000339	254	gi|300669710	finc_human ame: full=fibronectin short=fn ame: full=cold-insoluble globulin short=cig contains: ame: full=anastellin contains: ame: full=ugl-y1 contains: ame: full=ugl-y2 contains: ame: full=ugl-y3 flags: precursor	2.08675e-31	100	134.035	65
all-unigene000341	233	gi|75191498	pks2_arath ame: full=protein phytochrome kinase substrate 2	3.89574e-25	76	113.235	88
all-unigene000345	671	gi|122215068	frs2_arath ame: full=protein far1-related sequence 2	2.43939e-102	87	371.318	221
all-unigene000346	584	gi|74555624	pur2_metmp ame: full=phosphoribosylamine--glycine ligase ame: full=gars ame: full=glycinamide ribonucleotide synthetase ame: full=phosphoribosylglycinamide synthetase	1e-05	50	35.039	84
all-unigene000347	345	gi|66774040	u73c1_arath ame: full=udp-glycosyltransferase 73c1 ame: full=cytokinin-o-glucosyltransferase 1 ame: full=zeatin o-glucosyltransferase 1 short= 1	2.16531e-52	94	203.756	113
all-unigene000352	728	gi|75099986	pr1b4_arath ame: full=pra1 family protein b4 short=	8.88099e-24	68	110.538	105
all-unigene000354	675	gi|75329736	xyll1_arath ame: full=d-xylose-proton symporter-like 1	4.10771e-49	75	194.512	158
all-unigene000355	249	gi|729003	cahc_horvu ame: full=carbonic chloroplastic ame: full=carbonate dehydratase flags: precursor	1.41179e-19	77	94.7449	81
all-unigene000356	637	gi|297788595	hypothetical protein ARALYDRAFT_920829	1.59965e-11	67	64.6994	67
all-unigene000358	645	gi|1175174	y152_npvac ame: full=uncharacterized kda protein in ien-pe38 intergenic region	1e-05	57	33.8834	56
all-unigene000359	876	gi|45477070	m1250_arath ame: full=uncharacterized mitochondrial protein g01250 ame: full=orf102	1.42982e-08	85	60.4622	42
all-unigene000361	358	gi|1706282	dr206_pea ame: full=disease resistance response protein 206	1e-05	50	33.113	51
all-unigene000362	278	gi|297800018	arm repeat superfamily isoform 1	1.70509e-25	91	109.383	60
all-unigene000363	1521	gi|52788265	nar1_klula ame: full=cytosolic fe-s cluster assembly factor nar1 ame: full=nuclear architecture-related protein 1	1e-05	59	36.1946	47
all-unigene000364	463	gi|384872663	yf48_schpo ame: full=uncharacterized wd repeat-containing protein	6.53632e-20	51	96.2857	147
all-unigene000365	412	gi|123780975	lace1_mouse ame: full=lactation elevated protein 1	2.23465e-09	51	60.8474	111
all-unigene000366	437	gi|75334907	cipk5_arath ame: full=cbl-interacting serine threonine-protein kinase 5 ame: full=snf1-related kinase ame: full=sos2-like protein kinase pks19	2.95125e-45	85	180.259	117
all-unigene000367	965	gi|46395648	drl2_arath ame: full=probable disease resistance protein at1g12290	1.40225e-15	79	83.9593	72
all-unigene000369	284	gi|353558688	lin_medtr ame: full= e3 ubiquitin-protein ligase lin short=	1.46277e-08	59	58.151	92
all-unigene000370	265	gi|152013441	crk16_arath ame: full= cysteine-rich receptor-like protein kinase 16 short=cysteine-rich rlk16 flags: precursor	1.28762e-41	94	167.933	88
all-unigene000371	765	gi|152060560	rreb1_mouse ame: full=ras-responsive element-binding protein 1 short=rreb-1 ame: full=ras-responsive zinc finger transcription factor rreb	1e-05	56	38.891	58
all-unigene000372	678	gi|317373534	pepl_human ame: full=periplakin ame: full=190 kda paraneoplastic pemphigus antigen ame: full=195 kda cornified envelope precursor protein	1e-05	50	34.6538	97
all-unigene000373	592	gi|363548410	fbd16_arath ame: full= fbd-associated f-box protein at5g38570	4.63239e-16	53	84.3445	127
all-unigene000375	222	gi|74583195	yd274_yeast ame: full= uncharacterized protein ydr274c	1e-05	51	33.113	43
all-unigene000377	330	gi|302425239	fb348_arath ame: full=f-box protein at2g16365	6.04207e-07	76	52.7582	38
all-unigene000380	461	gi|9758031	non-ltr retroelement reverse transcriptase	5.79291e-15	67	79.337	83
all-unigene000381	303	gi|12321437	haus augmin-like complex subunit	3.89079e-17	100	80.4925	38
all-unigene000383	263	gi|73921222	nipa_ponab ame: full=nuclear-interacting partner of alk ame: full=nuclear-interacting partner of anaplastic lymphoma kinase ame: full=zinc finger c3hc-type protein 1	8.74515e-06	43	48.9062	82
all-unigene000385	273	gi|9294534	endonuclease or glycosyl hydrolase	2.91259e-12	71	69.3218	60
all-unigene000386	686	gi|158706355	se1l2_human ame: full=protein sel-1 homolog 2 ame: full=suppressor of lin-12-like protein 2 short=sel-1l2 flags: precursor	1e-05	52	43.8986	82
all-unigene000387	216	gi|15232853	bromodomain transcription factor	8.30306e-22	88	95.1301	62
all-unigene000389	322	gi|75075702	anxa5_macfa ame: full=annexin a5 ame: full=annexin v ame: full=annexin-5	2.29508e-54	100	210.305	106
all-unigene000388	256	gi|12320895	protein salt tolerance 32	2.65663e-09	80	57.7658	36
all-unigene000391	314	gi|264664500	y4265_arath ame: full=probable lrr receptor-like serine threonine-protein kinase at4g26540 flags: precursor	6.80091e-14	68	75.8702	73
all-unigene000392	236	gi|297839417	conserved peptide upstream open reading frame 5	5.03449e-21	100	87.8113	44
all-unigene000395	523	gi|482562847	hypothetical protein CARUB_v10023133mg	3.28591e-35	79	137.502	97
all-unigene000398	325	gi|297838265	expressed protein	1.40215e-19	72	85.5001	69
all-unigene000399	726	gi|136479	tctp_human ame: full=translationally-controlled tumor protein short=tctp ame: full=fortilin ame: full=histamine-releasing factor short=hrf ame: full=p23	5.63758e-95	100	347.051	170
all-unigene000401	201	gi|152013452	crk8_arath ame: full=cysteine-rich receptor-like protein kinase 8 short=cysteine-rich rlk8 flags: precursor	4.03092e-06	67	50.0618	40
all-unigene000402	381	gi|357529063	y1745_arath ame: full=uncharacterized protein at1g51745	5.33459e-11	88	66.2402	36
all-unigene000403	453	gi|357529063	y1745_arath ame: full=uncharacterized protein at1g51745	6.96138e-11	88	66.2402	36
all-unigene000404	649	gi|29839687	wrk19_arath ame: full=probable wrky transcription factor 19 ame: full=wrky dna-binding protein 19	1.23174e-47	76	189.504	151
all-unigene000405	890	gi|75151183	fbk50_arath ame: full=f-box kelch-repeat protein at3g06240	2.06663e-34	55	89.7373	127
all-unigene000407	214	gi|334302895	idi1_arath ame: full=isopentenyl-diphosphate delta-isomerase chloroplastic ame: full=isopentenyl pyrophosphate isomerase i short=ipp isomerase i flags: precursor	2.4756e-24	90	110.538	62
all-unigene000409	244	gi|297807547	rna-binding kh domain-containing protein	1.96525e-12	80	70.4774	52
all-unigene000410	365	gi|264664500	y4265_arath ame: full=probable lrr receptor-like serine threonine-protein kinase at4g26540 flags: precursor	1.92473e-32	73	137.502	128
all-unigene000412	525	gi|26449684	late embryogenesis abundant hydroxyproline-rich glycoprotein	6.63232e-32	82	125.176	126
all-unigene000411	395	gi|215274264	coia1_human ame: full=collagen alpha-1 chain contains: ame: full=endostatin flags: precursor	1e-05	47	36.5798	55
all-unigene000413	344	gi|81170486	g6pi2_colp3 ame: full=glucose-6-phosphate isomerase 2 short=gpi 2 ame: full=phosphoglucose isomerase 2 short=pgi 2 ame: full=phosphohexose isomerase 2 short=phi 2	1e-05	51	32.3426	74
all-unigene000416	235	gi|75100552	miox2_arath ame: full=inositol oxygenase 2 ame: full=myo-inositol oxygenase 2 short= 2 short=mi oxygenase 2	1.80407e-22	83	104.375	67
all-unigene000417	213	gi|75100552	miox2_arath ame: full=inositol oxygenase 2 ame: full=myo-inositol oxygenase 2 short= 2 short=mi oxygenase 2	3.59138e-07	62	53.5286	51
all-unigene000415	578	gi|74853440	y6968_dicdi ame: full=uncharacterized protein ddb_g0286423	1e-05	55	36.1946	61
all-unigene000418	265	gi|334351219	xmt1_cofca ame: full=7-methylxanthosine synthase 1 ame: full=xanthosine methyltransferase short=xmt	1e-05	66	46.2098	62
all-unigene000420	557	gi|42568123	uncharacterized loc101206485	1.73645e-116	96	348.206	185
all-unigene000421	540	gi|75223286	pp2b1_arath ame: full=f-box protein pp2-b1 ame: full=protein phloem protein 2-like b1 short= 2-b1 ame: full=skp1-interacting partner 21	3.46129e-41	62	167.548	186
all-unigene000423	1705	gi|75097884	snc1_arath ame: full=protein suppressor of npr1- constitutive 1 short= 1 ame: full=disease resistance rpp5-like protein	8.03568e-69	54	261.922	400
all-unigene000424	464	gi|12230461	pma8_arath ame: full=atpase plasma membrane-type ame: full=proton pump 8	1.27269e-23	63	108.612	128
all-unigene000425	368	gi|81956062	orf4_gfkvm ame: full=uncharacterized protein orf4	1e-05	68	35.8094	35
all-unigene000427	309	gi|75041655	snx14_ponab ame: full=sorting nexin-14	1e-05	57	34.6538	59
all-unigene000428	313	gi|75165124	sps1_arath ame: full=sucrose-phosphate synthase 1 ame: full=sucrose-phosphate synthase 1f short= 1f ame: full=sucrose-phosphate synthase short= ame: full=udp-glucose-fructose-phosphate glucosyltransferase	1.11841e-24	89	111.694	65
all-unigene000430	824	gi|296439504	co1a1_human ame: full=collagen alpha-1 chain ame: full=alpha-1 type i collagen flags: precursor	1.50175e-97	93	355.91	179
all-unigene000431	654	gi|46577339	tmvrn_nicgu ame: full=tmv resistance protein n	1.48989e-32	64	139.428	153
all-unigene000432	268	gi|8778215	nucleic acid- ob-fold-like protein	1.69813e-14	61	75.8702	86
all-unigene000433	272	gi|119604242	methyltransferase-like protein 10-like	4.18928e-10	69	61.2326	46
all-unigene000434	331	gi|442570191	kar5_ashgo ame: full=nuclear fusion protein kar5 ame: full=karyogamy protein 5 flags: precursor	1e-05	62	32.3426	48
all-unigene000454	312	gi|75298101	bh010_arath ame: full=transcription factor bhlh10 ame: full=basic helix-loop-helix protein 10 short= 10 short=bhlh 10 ame: full=transcription factor en 23 ame: full=bhlh transcription factor bhlh010	8.91188e-14	52	75.485	91
all-unigene000437	388	gi|223635599	pglr_vitvi ame: full=probable polygalacturonase short=pg ame: full=pectinase	1.76539e-14	56	77.7962	98
all-unigene000438	371	gi|82180686	fa83g_xenla ame: full=protein fam83g	1e-05	47	36.1946	84
all-unigene000439	292	gi|122135320	casc1_bovin ame: full=cancer susceptibility candidate protein 1 homolog	1e-05	52	32.3426	51
all-unigene000440	811	gi|68053169	xpo1_mouse ame: full=exportin-1 short=exp1 ame: full=chromosome region maintenance 1 protein homolog	6.6481e-58	64	224.172	271
all-unigene000441	336	gi|89257648	1-phosphatidylinositol- -bisphosphate phosphodiesterase delta-1	8.82084e-59	97	196.438	111
all-unigene000443	358	gi|122236144	pp319_arath ame: full=pentatricopeptide repeat-containing protein at4g18520	4.49435e-18	69	89.7373	83
all-unigene000445	260	gi|81570155	cobs_trede ame: full=cobalamin synthase	1e-05	50	33.113	50
all-unigene000446	253	gi|89257556	hypothetical protein 26.t00107	3.52965e-12	82	67.781	46
all-unigene000447	595	gi|75207269	dhqsd_arath ame: full=bifunctional 3-dehydroquinate dehydratase shikimate chloroplastic short=dhq-sdh protein ame: full=dhqase-sorase ame: full=protein embryo defective 3004 includes: ame: full=dehydroquinate dehydratase short=dhq includes: ame: full=shikimate dehydrogenase short=sdh flags: precursor	8.89815e-17	72	53.9138	47
all-unigene000453	477	gi|313471378	orp4b_arath ame: full=oxysterol-binding protein 4b ame: full=osbp-related protein 4b	4.17133e-76	92	283.108	159
all-unigene000455	408	gi|124056490	co3a1_human ame: full=collagen alpha-1 chain flags: precursor	1.35002e-46	93	184.496	88
all-unigene000456	252	gi|325511374	y1972_arath ame: full=probable lrr receptor-like serine threonine-protein kinase at1g29720 flags: precursor	1.82385e-35	95	147.517	84
all-unigene000457	1040	gi|90101362	if2_lacss ame: full=translation initiation factor if-2	1e-05	43	43.5134	139
all-unigene000459	507	gi|75169683	sot18_arath ame: full=cytosolic sulfotransferase 18 short= 18 ame: full=desulfo-glucosinolate sulfotransferase b ame: full=sulfotransferase 5b short= 5b	6.36493e-20	92	96.6709	53
all-unigene000458	305	gi|1168536	aspr_horvu ame: full=phytepsin ame: full=aspartic proteinase contains: ame: full=phytepsin 32 kda subunit contains: ame: full=phytepsin 29 kda subunit contains: ame: full=phytepsin 16 kda subunit contains: ame: full=phytepsin 11 kda subunit flags: precursor	1.5126e-53	98	207.608	101
all-unigene000462	276	gi|55584037	dof54_arath ame: full=dof zinc finger protein short= ame: full=obf-binding protein 4	3.63792e-07	66	53.5286	48
all-unigene000463	423	gi|334302851	rlp12_arath ame: full=receptor-like protein 12 short= 12 flags: precursor	1.02494e-09	51	62.003	88
all-unigene000465	239	gi|75273549	drb3_arath ame: full=double-stranded rna-binding protein 3 ame: full=dsrna-binding protein 3 short= 3	8.37375e-12	56	68.9366	79
all-unigene000467	618	gi|115073	bmp4_human ame: full=bone morphogenetic protein 4 short=bmp-4 ame: full=bone morphogenetic protein 2b short=bmp-2b flags: precursor	1e-05	37	33.8834	126
all-unigene000472	456	gi|75209281	rtnlb_arath ame: full=reticulon-like protein b2 short= 2 ame: full= 2-interacting protein 2	1.87265e-11	52	68.1662	84
all-unigene000471	612	gi|75183419	pp270_arath ame: full=pentatricopeptide repeat-containing protein at3g48810	1.86141e-55	85	215.312	141
all-unigene000489	785	gi|75186627	pp217_arath ame: full=pentatricopeptide repeat-containing protein at3g06920	9.87342e-136	96	482.641	261
all-unigene000473	451	gi|302595939	amsh3_arath ame: full=amsh-like ubiquitin thioesterase 3 ame: full=deubiquitinating enzyme amsh3	1e-05	53	33.8834	78
all-unigene000474	207	gi|482568380	phosphoinositide phosphatase family protein	3.57448e-16	100	81.2629	34
all-unigene000475	623	gi|130582	polx_tobac ame: full=retrovirus-related pol polyprotein from transposon tnt 1-94 includes: ame: full=protease includes: ame: full=reverse transcriptase includes: ame: full=endonuclease	5.48648e-42	61	170.629	207
all-unigene000479	251	gi|125681	kra59_human ame: full=keratin-associated protein 5-9 ame: full= ultrahigh sulfur 1 ame: full= ultra high-sulfur matrix protein a ame: full=keratin-associated protein ame: full=uhs keratin a short=uhs ame: full=ultrahigh sulfur keratin-associated protein	1e-05	41	32.3426	48
all-unigene000480	325	gi|334302789	exoc6_arath ame: full=probable exocyst complex component 6 ame: full=exocyst complex component sec15	4.64695e-15	72	79.7221	68
all-unigene000481	231	gi|68565249	c85a2_arath ame: full=cytochrome p450 85a2 ame: full=brassinosteroid-6-oxidase 2 short=br6ox 2 ame: full=c6-oxidase 2	1.78744e-13	97	69.3218	34
all-unigene000482	553	gi|13878350	bchz_erylo ame: full=chlorophyllide reductase subunit z ame: full=chlorin reductase subunit z	1e-05	48	34.2686	56
all-unigene000485	336	gi|223635613	pp317_arath ame: full=pentatricopeptide repeat-containing protein at4g17616	4.72043e-47	88	186.037	117
all-unigene000483	262	gi|341942151	rif1_yeast ame: full=telomere length regulator protein rif1 ame: full=rap1-interacting factor 1	1e-05	47	33.8834	69
all-unigene000484	356	gi|130398	pol2_drome ame: full=retrovirus-related pol polyprotein from transposon 297 includes: ame: full=protease includes: ame: full=reverse transcriptase includes: ame: full=endonuclease	8.47598e-17	64	85.5001	97
all-unigene000487	503	gi|75318500	y1747_arath ame: full=inactive serine threonine-protein kinase at1g67470	3.79711e-17	58	87.4261	129
all-unigene000488	287	gi|75281793	plcd2_arath ame: full=phosphoinositide phospholipase c 2 ame: full=phosphoinositide phospholipase plc2 short= 2 short=pi-plc2	2.09565e-23	96	107.457	53
all-unigene000490	491	gi|75262385	aap7_arath ame: full=probable amino acid permease 7 ame: full=amino acid transporter aap7	1.42382e-50	93	198.364	112
all-unigene000492	233	gi|297829748	adenine nucleotide alpha hydrolases-like protein	2.64586e-26	96	105.145	77
all-unigene000494	284	gi|1173017	rl27a_human ame: full=60s ribosomal protein l27a	1.14566e-45	100	181.415	89
all-unigene000495	358	gi|75173194	bh143_arath ame: full=transcription factor bhlh143 ame: full=basic helix-loop-helix protein 143 short= 143 short=bhlh 143 ame: full=transcription factor en 129 ame: full=bhlh transcription factor bhlh143	6.87764e-35	64	145.591	138
all-unigene000496	486	gi|297850276	predicted protein	3.4793e-29	80	113.235	101
all-unigene000497	242	gi|408360162	muc22_human ame: full=mucin-22 ame: full=panbronchiolitis-related mucin-like protein 1 flags: precursor	1e-05	55	34.2686	54
all-unigene000501	388	gi|74582585	mu135_schpo ame: full=meiotically up-regulated gene 135 protein	1e-05	43	27.335	53
all-unigene000504	427	gi|75311440	hxk3_arath ame: full=hexokinase-3	3.03934e-20	94	97.0561	53
all-unigene000506	205	gi|75170840	rbohd_arath ame: full=respiratory burst oxidase homolog protein d ame: full=nadph oxidase rbohd short=	7.2684e-24	100	108.997	54
all-unigene000509	262	gi|325511374	y1972_arath ame: full=probable lrr receptor-like serine threonine-protein kinase at1g29720 flags: precursor	4.60493e-31	93	132.88	73
all-unigene000510	891	gi|297817728	nhl domain-containing protein	7.1688e-08	52	55.8398	97
all-unigene000513	324	gi|75170229	pp417_arath ame: full=pentatricopeptide repeat-containing protein at5g44230	1.75545e-46	91	184.111	107
all-unigene000514	341	gi|267211	v120_shv21 ame: full=capsid assembly protein 63	1e-05	54	32.7278	74
all-unigene000520	489	gi|75333773	rh32_arath ame: full=dead-box atp-dependent rna helicase 32	1.10508e-55	90	215.312	133
all-unigene000522	407	gi|482565101	downstream target of agl15 2	2.6075e-07	68	57.3806	50
all-unigene000524	297	gi|25453071	saps2_mouse ame: full=serine threonine-protein phosphatase 6 regulatory subunit 2 ame: full=saps domain family member 2	2.15251e-12	63	70.8626	92
all-unigene000527	421	gi|133327	rpb1_mouse ame: full=dna-directed rna polymerase ii subunit rpb1 short=rna polymerase ii subunit b1 ame: full=dna-directed rna polymerase ii subunit a ame: full=dna-directed rna polymerase iii largest subunit	1e-05	43	33.113	74
all-unigene000530	284	gi|81882975	s47a1_rat ame: full=multidrug and toxin extrusion protein 1 short=mate-1 short=rmate-1 ame: full=solute carrier family 47 member 1	6.14565e-07	50	52.7582	71
all-unigene000532	255	gi|15220557	uncharacterized protein	5.6547e-18	70	84.7297	84
all-unigene000535	276	gi|75097884	snc1_arath ame: full=protein suppressor of npr1- constitutive 1 short= 1 ame: full=disease resistance rpp5-like protein	8.9605e-06	51	48.9062	99
all-unigene000536	490	gi|75213506	kcs16_arath ame: full=3-ketoacyl- synthase 16 short=kcs-16 ame: full=very long-chain fatty acid condensing enzyme 16 short=vlcfa condensing enzyme 16 flags: precursor	2.60074e-32	84	90.5077	58
all-unigene000540	437	gi|3785984	non-ltr retroelement reverse transcriptase	4.51425e-17	72	65.855	55
all-unigene000539	378	gi|75319418	cdpk6_arath ame: full=calcium-dependent protein kinase 6 ame: full=calcium-dependent protein kinase isoform cdpk3 short= 3 ame: full=calmodulin-domain protein kinase cdpk isoform 6	1.60823e-15	60	81.2629	94
all-unigene000545	358	gi|109940148	rl9_orysj ame: full=60s ribosomal protein l9	5.13029e-22	96	102.834	54
all-unigene000546	433	gi|71153763	sk2l2_mouse ame: full=superkiller viralicidic activity 2-like 2 ame: full=atp-dependent helicase skiv2l2	1e-05	61	37.3502	49
all-unigene000548	409	gi|75169275	ago7_arath ame: full=protein argonaute 7 ame: full=protein zippy	1e-05	63	39.2762	36
all-unigene000549	324	gi|6226739	ayr1_schpo ame: full=nadph-dependent 1-acyldihydroxyacetone phosphate reductase short=adr ame: full=1-acyl dhap reductase ame: full=acyl alkyl dhap reductase ame: full=acylglycerone-phosphate reductase	1.26976e-12	61	71.633	95
all-unigene000552	430	gi|2851511	kad_parde ame: full=adenylate kinase short=ak ame: full=atp-amp transphosphorylase	1e-05	52	32.7278	38
all-unigene000553	348	gi|15217619	rna-directed dna polymerase (reverse transcriptase)-related family protein	2.57674e-18	56	85.8853	103
all-unigene000567	436	gi|1170470	iap_gvcpm ame: full=apoptosis inhibitor iap	8.96879e-10	60	62.3882	64
all-unigene000554	215	gi|172044677	cslab_arath ame: full=probable mannan synthase 11 ame: full=cellulose synthase-like protein a11 short= sla11	1.54702e-34	95	144.436	71
all-unigene000555	258	gi|56749666	rir1_arath ame: full=ribonucleoside-diphosphate reductase large subunit ame: full=ribonucleoside-diphosphate reductase r1 subunit short= 1	8.44546e-33	89	138.658	85
all-unigene000556	368	gi|75163674	gdl65_arath ame: full=gdsl esterase lipase at4g18970 ame: full=extracellular lipase at4g18970 flags: precursor	4.87739e-36	92	149.443	81
all-unigene000557	411	gi|15221221	intron maturase isoform 1	2.44173e-33	100	132.88	59
all-unigene000558	977	gi|47605929	ice1_arath ame: full=transcription factor ice1 ame: full=basic helix-loop-helix protein 116 short= 116 short=bhlh 116 ame: full=inducer of cbf expression 1 ame: full=transcription factor en 45 ame: full=transcription factor scream ame: full=bhlh transcription factor bhlh116	1.47956e-12	71	73.9442	70
all-unigene000561	1360	gi|82186562	pr38b_danre ame: full=pre-mrna-splicing factor 38b	1e-05	40	42.3578	180
all-unigene000563	470	gi|75200246	ppr6_arath ame: full=pentatricopeptide repeat-containing protein mitochondrial flags: precursor	8.75664e-76	94	281.952	156
all-unigene000564	385	gi|297797667	protein kinase-like protein	7.89851e-12	88	69.707	43
all-unigene000565	307	gi|75339264	p2c71_arath ame: full=probable protein phosphatase 2c 71 short= 2c71	2.49078e-48	96	190.274	102
all-unigene000568	257	gi|75198478	lng2_arath ame: full=protein longifolia 2 ame: full=protein ton1 recruiting motif 1	2.64368e-10	49	63.929	85
all-unigene000580	760	gi|166215389	dnlj_anadf ame: full=dna ligase ame: full=polydeoxyribonucleotide synthase	1e-05	65	34.6538	35
all-unigene000581	502	gi|75301346	ring3_arath ame: full=e3 ubiquitin-protein ligase at3g02290 ame: full=ring finger protein at3g02290	2.46121e-16	71	84.7297	57
all-unigene000582	380	gi|75213389	y1661_arath ame: full= g-type lectin s-receptor-like serine threonine-protein kinase at1g61610 flags: precursor	6.04079e-55	89	212.231	129
all-unigene000583	390	gi|357528922	rf3_lacpl ame: full=peptide chain release factor 3 short=rf-3	1e-05	47	34.6538	69
all-unigene000586	416	gi|171460804	reco_synfm ame: full=dna repair protein ame: full=recombination protein o	1e-05	46	35.4242	93
all-unigene000587	201	gi|15227027	bzip transcription factor bzip109	1.90304e-24	96	101.293	55
all-unigene000590	451	gi|12230896	eftu_pseae ame: full=elongation factor tu short=ef-tu	1e-05	64	34.2686	34
all-unigene000591	420	gi|334185486	myosin 1	3.40603e-52	78	187.963	133
all-unigene000595	577	gi|215274155	k121l_human ame: full=uncharacterized protein kiaa1211-like	1e-05	48	30.8018	54
all-unigene000592	300	gi|75309869	nds8b_arath ame: full=nadh dehydrogenase iron-sulfur protein 8- mitochondrial flags: precursor	2.80204e-12	76	70.4774	47
all-unigene000593	335	gi|15235334	uncharacterized protein	1.22537e-10	67	65.855	105
all-unigene000594	840	gi|74861299	y2012_dicdi ame: full= elongation of fatty acids protein ddb_g0272012 ame: full=3-keto acyl- synthase ddb_g0272012 ame: full=very-long-chain 3-oxoacyl- synthase ddb_g0272012	1.34517e-08	45	60.4622	189
all-unigene000596	313	gi|74996594	gacw_dicdi ame: full=rho gtpase-activating protein gacw ame: full=gtpase activating factor for rac protein w	1e-05	43	25.7942	44
all-unigene000598	588	gi|75214681	y4443_arath ame: full=probable transposase-like protein at4g04430	1e-05	75	43.5134	36
all-unigene000599	720	gi|46395648	drl2_arath ame: full=probable disease resistance protein at1g12290	1.17789e-44	60	179.874	223
all-unigene000601	280	gi|363579868	fpgs1_arath ame: full=folylpolyglutamate synthase ame: full=dhfs-fpgs homolog b ame: full=folylpoly-gamma-glutamate synthetase short=fpgs ame: full=tetrahydrofolylpolyglutamate synthase short=tetrahydrofolate synthase	1.32116e-25	83	114.775	79
all-unigene000603	205	gi|334302916	crk10_arath ame: full=cysteine-rich receptor-like protein kinase 10 short=cysteine-rich rlk10 ame: full=receptor-like protein kinase 4 flags: precursor	2.85159e-28	91	123.635	68
all-unigene000604	339	gi|44889064	expa6_arath ame: full=expansin-a6 short= 6 ame: full=alpha-expansin-6 short=at-exp6 short= x6 ame: full=ath- lpha- flags: precursor	4.02893e-06	75	50.0618	37
all-unigene000605	494	gi|123892606	rn170_xentr ame: full=e3 ubiquitin-protein ligase rnf170 ame: full=ring finger protein 170	4.70702e-17	50	87.0409	135
all-unigene000606	329	gi|482574815	nucleoside nucleotide kinase domain-containing protein	3.58316e-41	100	151.754	72
all-unigene000607	471	gi|4733964	ta11-like non-ltr retroelement protein	2.28796e-14	84	78.9518	46
all-unigene000608	419	gi|229891476	pme64_arath ame: full=probable pectinesterase pectinesterase inhibitor 64 includes: ame: full=pectinesterase inhibitor 64 ame: full=pectin methylesterase inhibitor 64 includes: ame: full=pectinesterase 64 short=pe 64 ame: full=pectin methylesterase 64 short= 64	2.61695e-10	58	55.8398	63
all-unigene000609	272	gi|122180214	fbk43_arath ame: full=f-box kelch-repeat protein at2g43270	6.41231e-20	76	95.9005	68
all-unigene000611	244	gi|75333385	crk5_arath ame: full=cysteine-rich receptor-like protein kinase 5 short=cysteine-rich rlk5 ame: full=receptor-like protein kinase 6 flags: precursor	5.9225e-34	92	142.51	81
all-unigene000610	266	gi|75328843	rma3_arath ame: full=e3 ubiquitin-protein ligase rma3 ame: full=protein ring membrane-anchor 3	2.36298e-19	73	93.9745	63
all-unigene000614	319	gi|75217988	y2215_arath ame: full=uncharacterized protein at2g02148	1.96101e-21	89	100.908	59
all-unigene000615	331	gi|75221275	acco2_arath ame: full=1-aminocyclopropane-1-carboxylate oxidase 2 short=acc oxidase 2 short= 2	4.32467e-21	98	99.7525	50
all-unigene000616	227	gi|327488374	pob1_arath ame: full=btb poz domain-containing protein pob1 ame: full=poz btb containing-protein 1 short= 1	5.43556e-32	96	135.961	75
all-unigene000618	531	gi|42570377	cystatin monellin domain-containing protein	2.59973e-08	64	58.5362	84
all-unigene000621	538	gi|357529151	snl5_arath ame: full=paired amphipathic helix protein sin3-like 5	2.14244e-35	60	148.288	176
all-unigene000622	205	gi|4760708	rna-directed dna polymerase (reverse transcriptase)-related family protein	1.28145e-20	75	90.5077	66
all-unigene000623	223	gi|82183880	ppde2_xenla ame: full=desumoylating isopeptidase 1 short= -1 ame: full=pppde peptidase domain-containing protein 2 ame: full=protein fam152b	1e-05	77	48.521	35
all-unigene000624	274	gi|313471776	y1670_arath ame: full=probable receptor-like protein kinase at1g67000 flags: precursor	5.41099e-19	79	92.8189	64
all-unigene000625	487	gi|297834688	hypothetical protein ARALYDRAFT_479255	5.23433e-15	67	81.6481	76
all-unigene000626	310	gi|502095453	hypersensitive to pi starvation 4	1.42529e-18	77	90.1225	72
all-unigene000649	459	gi|292630785	glyt5_arath ame: full=probable glycosyltransferase at5g20260	2.56504e-77	96	286.96	152
all-unigene000630	367	gi|20140026	sqv7_caeel ame: full=udp-sugar transporter sqv-7 ame: full=squashed vulva protein 7	1e-05	47	35.4242	55
all-unigene000631	216	gi|152013441	crk16_arath ame: full= cysteine-rich receptor-like protein kinase 16 short=cysteine-rich rlk16 flags: precursor	1.45133e-24	88	111.309	70
all-unigene000633	394	gi|75311687	ccu42_arath ame: full=cyclin-u4-2 short= 4 2 ame: full=cyclin- short= 4 3	6.42266e-12	75	69.3218	52
all-unigene000634	444	gi|3024017	if1a_onovi ame: full=eukaryotic translation initiation factor 1a short=eif-1a ame: full=eukaryotic translation initiation factor 4c short=eif-4c	7.01256e-10	60	62.7734	88
all-unigene000635	270	gi|281312226	bgl21_orysj ame: full=beta-glucosidase 21 short=os5bglu21 flags: precursor	1.06187e-06	72	51.9878	48
all-unigene000637	309	gi|300681006	creb_asptn ame: full=probable ubiquitin carboxyl-terminal hydrolase creb ame: full=carbon catabolite repression protein b ame: full=deubiquitinating enzyme creb ame: full=ubiquitin thioesterase creb ame: full=ubiquitin-hydrolyzing enzyme creb ame: full=ubiquitin-specific-processing protease creb	1e-05	56	32.3426	53
all-unigene000638	566	gi|13431563	hip1r_human ame: full=huntingtin-interacting protein 1-related protein short=hip1-related protein ame: full=huntingtin-interacting protein 12 short=hip-12	1e-05	44	35.039	101
all-unigene000639	962	gi|12230237	mb22_arath ame: full=myrosinase-binding at2g39310	9.70295e-118	79	423.32	304
all-unigene000640	524	gi|75216205	cslcc_arath ame: full=probable xyloglucan glycosyltransferase 12 ame: full=cellulose synthase-like protein c12 short= slc12	3.27159e-46	89	184.111	107
all-unigene000641	267	gi|325511374	y1972_arath ame: full=probable lrr receptor-like serine threonine-protein kinase at1g29720 flags: precursor	1.13063e-29	79	128.257	87
all-unigene000643	213	gi|30913045	exs_arath ame: full=leucine-rich repeat receptor protein kinase exs ame: full=extra sporogenous cells protein ame: full=protein excess microsporocytes 1 flags: precursor	1.61698e-07	69	54.6842	52
all-unigene000644	202	gi|75206187	kcs9_arath ame: full=3-ketoacyl- synthase 9 short=kcs-9 ame: full=very long-chain fatty acid condensing enzyme 9 short=vlcfa condensing enzyme 9	1.01963e-17	100	88.5817	39
all-unigene000648	1415	gi|224493121	lup3_arath ame: full=camelliol c synthase ame: full=lupeol synthase 3 short= 3	6.11757e-80	85	298.516	178
all-unigene000654	216	gi|297793029	mitochondrial transcription termination factor family protein	6.24397e-17	81	82.8037	59
all-unigene000650	363	gi|121252	glb78_chitp ame: full=globin ctt-viib-8 flags: precursor	1e-05	60	32.7278	40
all-unigene000651	791	gi|24212073	omt1_arath ame: full=flavone 3 -o-methyltransferase 1 short= 1 ame: full=caffeate o-methyltransferase 1 ame: full=quercetin 3 -o-methyltransferase 1	1.96872e-67	70	255.758	242
all-unigene000655	300	gi|205828996	mnma_sulnb ame: full=trna-specific 2-thiouridylase	1e-05	59	33.113	47
all-unigene000656	1113	gi|158512936	g11a_orysi ame: full=protein kinase g11a	1.64049e-74	70	280.026	244
all-unigene000657	699	gi|126302590	rbl_horvu ame: full=ribulose bisphosphate carboxylase large chain short= isco large subunit flags: precursor	6.19511e-136	100	483.026	233
all-unigene000658	350	gi|21264442	hs17c_arath ame: full= kda class i heat shock protein 3 ame: full= kda heat shock protein 3 short=	5.15409e-30	95	129.413	66
all-unigene000659	1161	gi|116256123	wakln_arath ame: full=wall-associated receptor kinase-like 18 flags: precursor	8.06094e-64	52	244.588	375
all-unigene000664	327	gi|75335407	ab17b_arath ame: full=abc transporter b family member 17 short=abc transporter short= 17 ame: full=p-glycoprotein 17 ame: full= multidrug resistance protein 19	1.70062e-17	71	87.8113	64
all-unigene000667	522	gi|136580	tyb4_mouse ame: full=thymosin beta-4 short=t beta 4 contains: ame: full=hematopoietic system regulatory peptide ame: full=seraspenide	5.72575e-19	100	93.5893	46
all-unigene000669	324	gi|122241485	akrc9_arath ame: full=aldo-keto reductase family 4 member c9	1.03523e-14	88	78.5666	44
all-unigene000671	291	gi|325511374	y1972_arath ame: full=probable lrr receptor-like serine threonine-protein kinase at1g29720 flags: precursor	1.03091e-30	78	131.724	97
all-unigene000672	318	gi|8777569	copia-type pol poly	1.85295e-42	82	158.303	113
all-unigene000674	586	gi|130582	polx_tobac ame: full=retrovirus-related pol polyprotein from transposon tnt 1-94 includes: ame: full=protease includes: ame: full=reverse transcriptase includes: ame: full=endonuclease	4.50372e-32	65	137.502	164
all-unigene000675	625	gi|20532311	yy46_anasp ame: full=uncharacterized wd repeat-containing protein alr3466	4.66997e-09	50	61.2326	142
all-unigene000677	345	gi|60390166	gaox1_arath ame: full=gibberellin 20 oxidase 1 ame: full=ga 20-oxidase 1 short= 20ox ame: full=gibberellin c-20 oxidase 1	5.05008e-09	71	59.6918	56
all-unigene000678	246	gi|75208278	pp340_arath ame: full=pentatricopeptide repeat-containing protein at4g28010	5.36912e-27	87	119.398	74
all-unigene000679	275	gi|75174713	b3gt5_arath ame: full=probable beta- -galactosyltransferase 5	1.23164e-23	97	85.5001	41
all-unigene000680	339	gi|44888113	m300_arath ame: full=uncharacterized mitochondrial protein g00300 ame: full=orf1451 ame: full=orf145a	1e-05	46	48.1358	83
all-unigene000682	230	gi|385178680	elp2_arath ame: full=elongator complex protein 2 short= 2 ame: full=elongator component 2 ame: full=protein green npr1 seedling on sa medium 1	1.86677e-24	79	110.923	68
all-unigene000683	294	gi|9758157	non-ltr retroelement reverse transcriptase	2.07997e-29	72	120.939	98
all-unigene000684	336	gi|75219937	fb333_arath ame: full=probable f-box protein at4g22030	9.93443e-13	80	72.0182	46
all-unigene000686	579	gi|125558	kpcg_bovin ame: full=protein kinase c gamma type short=pkc-gamma	1e-05	36	35.4242	104
all-unigene000689	204	gi|9758156	retroelement pol polyprotein	2.19761e-14	67	75.0998	68
all-unigene000690	346	gi|306756302	pho13_arath ame: full=phosphate transporter pho1 homolog 3 ame: full=protein pho1 homolog 3 short= 1 h3	5.91745e-26	67	115.931	106
all-unigene000706	405	gi|75277347	chx13_arath ame: full=cation h(+) symporter 13 ame: full=protein cation h+ exchanger 13 short= 13	2.21496e-65	94	246.899	136
all-unigene000691	408	gi|1731160	ysna_strpr ame: full= transposase in snaa-snab intergenic region ame: full=orf401	1e-05	45	33.113	66
all-unigene000693	363	gi|380876876	drp5a_arath ame: full=dynamin-related protein 5a ame: full=protein arc5-like	7.7674e-27	82	118.627	79
all-unigene000696	381	gi|75333786	srf2_arath ame: full=protein strubbelig-receptor family 2 ame: full=leucine-rich repeat receptor kinase-like protein srf2 flags: precursor	2.09554e-23	64	107.457	103
all-unigene000697	401	gi|238014838	cytochrome p450 liketbp	1.752e-19	95	89.7373	48
all-unigene000698	372	gi|482556198	polynucleotide adenylyltransferase family protein	4.22084e-56	90	192.586	111
all-unigene000701	321	gi|45645179	ssp2_playo ame: full=sporozoite surface protein 2 flags: precursor	1e-05	51	33.8834	62
all-unigene000702	250	gi|30580518	suvh2_arath ame: full=histone-lysine n- h3 lysine- h3 lysine- h4 lysine-20 and cytosine specific suvh2 ame: full=cytosine-hmtase 2 ame: full=h3-k27-hmtase 2 ame: full=h4-k20-hmtase 2 ame: full=histone h3-k9 methyltransferase 2 short=h3-k9-hmtase 2 ame: full=protein set domain group 3 ame: full=suppressor of variegation 3-9 homolog protein 2 short=su 3-9 homolog protein 2	2.4785e-24	70	110.538	84
all-unigene000703	766	gi|125987635	rnhx1_arath ame: full= ribonuclease h protein at1g65750	1e-05	67	35.8094	34
all-unigene000704	365	gi|75181716	wtr30_arath ame: full=wat1-related protein at4g01450	1.48401e-08	56	58.151	62
all-unigene000709	365	gi|82000071	coll6_mimiv ame: full=collagen-like protein 6	1e-05	52	33.113	42
all-unigene000710	373	gi|302595999	ulp2a_arath ame: full=probable ubiquitin-like-specific protease 2a	1e-05	54	45.8246	81
all-unigene000711	389	gi|122242689	fbk5_arath ame: full=f-box kelch-repeat protein at1g16250	2.99352e-22	88	103.605	59
all-unigene000715	259	gi|130189	phyb_arath ame: full=phytochrome b	1.54498e-10	89	64.6994	37
all-unigene000713	350	gi|60392921	pol2_mouse ame: full=retrovirus-related pol polyprotein line-1 ame: full=long interspersed element-1 short=l1 includes: ame: full=reverse transcriptase includes: ame: full=endonuclease	1e-05	62	33.113	45
all-unigene000714	443	gi|297813609	protein	2.36522e-22	86	99.3673	106
all-unigene000716	767	gi|4185148	non-ltr retroelement reverse transcriptase	2.48558e-25	71	73.559	73
all-unigene000717	665	gi|116908	comt1_medsa ame: full=caffeic acid 3-o-methyltransferase short=caomt short=comt ame: full=s-adenosysl-l-methionine:caffeic acid 3-o-methyltransferase	1.64829e-10	67	66.2402	58
all-unigene000719	348	gi|482558799	glutaredoxin family protein	5.70049e-46	86	159.073	115
all-unigene000718	433	gi|297819234	non-ltr retroelement reverse transcriptase	7.99349e-16	58	78.5666	103
all-unigene000720	951	gi|205413286	ycf2_olipu ame: full=protein ycf2	2.72925e-165	93	581.252	316
all-unigene000723	413	gi|297800004	protein	2.23259e-17	75	84.7297	72
all-unigene000724	256	gi|1171978	pabp2_arath ame: full=polyadenylate-binding protein 2 short=pabp-2 short=poly -binding protein 2	1e-05	58	46.2098	56
all-unigene000725	2387	gi|334302851	rlp12_arath ame: full=receptor-like protein 12 short= 12 flags: precursor	1.04722e-64	62	248.825	302
all-unigene000729	401	gi|240255671	major facilitator protein	2.92414e-18	97	88.5817	40
all-unigene000730	606	gi|75264129	fb31_arath ame: full= f-box protein at1g32660	3.35724e-17	53	88.1965	130
all-unigene000731	467	gi|75213572	tic22_arath ame: full=protein tic chloroplastic ame: full=translocon at the inner envelope membrane of chloroplasts 22 short= 22 flags: precursor	1e-05	44	43.5134	94
all-unigene000734	1001	gi|75219483	pi5k3_arath ame: full=phosphatidylinositol 4-phosphate 5-kinase 3 short= 5k3 ame: full=1-phosphatidylinositol 4-phosphate kinase 3 ame: full=diphosphoinositide kinase 3 ame: full= ns p-5-kinase 3	3.09418e-130	91	464.922	246
all-unigene000735	275	gi|75206576	pao2_arath ame: full=probable polyamine oxidase 2 short= 2 ame: full=amine oxidase 1	2.05618e-18	97	90.8929	45
all-unigene000739	366	gi|74583687	yo036_yeast ame: full=uncharacterized protein yol036w	1e-05	62	32.7278	45
all-unigene000740	443	gi|54036221	y3126_aciad ame: full=upf0758 protein aciad3126	1e-05	50	35.4242	65
all-unigene000745	280	gi|20138785	ics1_arath ame: full=isochorismate synthase chloroplastic short= cs1 short= ame: full=enhanced disease susceptibility 16 short=eds16 ame: full=isochorismate mutase 1 ame: full=salicylic acid induction deficient 2 short=sid2 ame: full=menf-like protein 1 flags: precursor	8.90304e-06	79	48.9062	39
all-unigene000746	614	gi|334302812	fut8_arath ame: full=probable fucosyltransferase 8 short= 8	1.86426e-87	86	321.627	204
all-unigene000747	427	gi|75333482	psyr1_arath ame: full=tyrosine-sulfated glycopeptide receptor 1	1.15214e-48	79	191.43	141
all-unigene000750	365	gi|75333956	agl80_arath ame: full=agamous-like mads-box protein agl80	1.73279e-49	96	194.126	109
all-unigene000751	572	gi|122248817	alfl8_orysj ame: full=phd finger protein alfin-like 8	1e-05	52	35.039	44
all-unigene000755	538	gi|75186627	pp217_arath ame: full=pentatricopeptide repeat-containing protein at3g06920	1.41983e-23	70	108.997	87
all-unigene000754	529	gi|297846838	ac020576_17contains weak similarity to dna replication licensing factor mcm2 from drosophila melanogaster gi	1.33534e-07	65	58.151	99
all-unigene000758	715	gi|125987635	rnhx1_arath ame: full= ribonuclease h protein at1g65750	1.10136e-18	43	93.5893	240
all-unigene000759	930	gi|75317773	y4200_arath ame: full=uncharacterized protein at4g02000	5.59552e-14	51	78.5666	123
all-unigene000762	306	gi|122233562	xb35_arath ame: full= e3 ubiquitin-protein ligase xbat35 ame: full=ankyrin repeat domain and ring finger-containing protein xbat35 ame: full=protein xb3 homolog 5	1.93128e-16	84	84.3445	50
all-unigene000763	424	gi|89257467	ethylene responsive element binding factor -related	4.25168e-11	54	55.0694	62
all-unigene000765	576	gi|30687326	dna double-strand break repair rad50 isoform 1	2.16059e-64	82	216.468	178
all-unigene000767	414	gi|75262248	fb91_arath ame: full=f-box protein at1g78100	8.36266e-49	79	191.815	157
all-unigene000774	324	gi|187609692	muc12_human ame: full=mucin-12 short=muc-12 ame: full=mucin-11 short=muc-11 flags: precursor	1e-05	45	32.7278	111
all-unigene000772	668	gi|75333385	crk5_arath ame: full=cysteine-rich receptor-like protein kinase 5 short=cysteine-rich rlk5 ame: full=receptor-like protein kinase 6 flags: precursor	1.69364e-63	79	242.276	193
all-unigene000773	257	gi|171921122	leucine-rich repeat family protein	5.47187e-29	92	118.242	85
all-unigene000776	226	gi|297818802	tubulin family protein	5.04051e-38	97	144.436	75
all-unigene000780	385	gi|482572016	uncharacterized loc101220556	8.83061e-29	89	113.235	68
all-unigene000782	403	gi|4678207	rna-directed dna polymerase (reverse transcriptase)-related family protein	1.77206e-38	70	142.51	130
all-unigene000783	424	gi|2495202	gl_hcmv6 ame: full=envelope glycoprotein l short=gl flags: precursor	1e-05	50	33.113	55
all-unigene000781	440	gi|112717	21kd_dauca ame: full=21 kda protein ame: full= protein flags: precursor	8.29546e-19	69	92.4337	99
all-unigene000784	1583	gi|300669707	znf83_human ame: full=zinc finger protein 83 ame: full=zinc finger protein 816b ame: full=zinc finger protein hpf1	1e-05	33	44.2838	368
all-unigene000785	529	gi|74866242	y3453_dicdi ame: full=uncharacterized protein ddb_g0273453 ddb_g0273565	1e-05	64	34.6538	34
all-unigene000787	372	gi|75171135	pp448_arath ame: full=pentatricopeptide repeat-containing protein mitochondrial flags: precursor	2.96918e-09	67	60.4622	58
all-unigene000786	221	gi|482569009	nuclear matrix constituent protein 1-like	1.65239e-17	98	85.5001	73
all-unigene000791	228	gi|7141316	af227978_1 g-protein-coupled transmembrane receptor	1.46554e-25	82	106.301	75
all-unigene000790	364	gi|292630704	ctc1_arath ame: full=cst complex subunit ctc1 ame: full=protein conserved telomere maintenance component 1 short= 1	2.77931e-31	72	133.65	126
all-unigene000793	1052	gi|75299548	bah1l_arath ame: full=probable e3 ubiquitin-protein ligase bah1-like ame: full=ring finger protein 178	5.97724e-164	90	577.015	327
all-unigene000794	553	gi|75160503	fbl40_arath ame: full=f-box lrr-repeat protein at2g43260	2.25628e-35	62	148.288	174
all-unigene000797	1244	gi|82176645	djb14_xenla ame: full= homolog subfamily b member 14	8.18723e-09	42	62.003	155
all-unigene000798	1019	gi|3319367	non-ltr retroelement reverse transcriptase	1.36441e-49	76	135.191	99
all-unigene000799	307	gi|135100	sydc_yeast ame: full=aspartate--trna cytoplasmic ame: full=aspartyl-trna synthetase short=	2.42936e-19	67	93.9745	97
all-unigene000802	452	gi|146286092	copd_arath ame: full=coatomer subunit delta ame: full=delta-coat protein short=delta-cop	4.08186e-48	89	189.889	120
all-unigene000805	251	gi|75191498	pks2_arath ame: full=protein phytochrome kinase substrate 2	4.36484e-29	84	126.331	84
all-unigene000804	224	gi|75318568	crk23_arath ame: full= cysteine-rich receptor-like protein kinase 23 short=cysteine-rich rlk23 flags: precursor	1.22311e-07	77	55.0694	36
all-unigene000808	338	gi|55976510	myo2_sacba ame: full=myosin-2 ame: full=class v unconventional myosin myo2 ame: full=type v myosin heavy chain myo2 short=myosin v myo2	1e-05	52	35.4242	80
all-unigene000813	286	gi|75338892	ab1b_arath ame: full=abc transporter b family member 1 short=abc transporter short= 1 ame: full=multidrug resistance protein 1 ame: full=p-glycoprotein 1 short= gp1	3.47035e-10	94	63.5438	34
all-unigene000814	214	gi|122214095	fbd36_arath ame: full=probable fbd-associated f-box protein at5g38565	1.00975e-09	75	62.003	49
all-unigene000816	617	gi|125987635	rnhx1_arath ame: full= ribonuclease h protein at1g65750	2.77833e-14	57	78.5666	98
all-unigene000815	287	gi|378405228	ttc40_human ame: full=tetratricopeptide repeat protein 40	1e-05	44	33.113	45
all-unigene000820	223	gi|75318501	srk2j_arath ame: full=serine threonine-protein kinase srk2j ame: full=ost1-kinase-like 10 ame: full=snf1-related kinase short=	8.43113e-25	85	112.079	69
all-unigene000821	305	gi|146286063	ccd1_arath ame: full=carotenoid (9 )-cleavage dioxygenase 1 ame: full= 1 ame: full=neoxanthin cleavage enzyme nc1 short= 1	3.76039e-20	94	96.6709	54
all-unigene000822	269	gi|15239081	d-arabinono- -lactone oxidase family protein	4.0969e-18	73	87.0409	63
all-unigene000823	435	gi|120668	g3pc2_horvu ame: full=glyceraldehyde-3-phosphate dehydrogenase cytosolic	7.20206e-76	100	281.952	142
all-unigene000824	229	gi|62899866	aldo1_arath ame: full=indole-3-acetaldehyde oxidase short=iaa oxidase ame: full=aldehyde oxidase 1 short=ao-1 short= -1 short= 1	5.43146e-24	90	109.383	64
all-unigene000827	398	gi|218527903	ndhk_bradi ame: full=nad h-quinone oxidoreductase subunit chloroplastic ame: full=nad h dehydrogenase subunit k ame: full=nadh-plastoquinone oxidoreductase subunit k	1e-05	54	33.113	51
all-unigene000828	437	gi|108860882	pdli2_bovin ame: full=pdz and lim domain protein 2	1e-05	42	32.3426	77
all-unigene000829	399	gi|334184784	ring-finger domain-containing protein	3.17555e-30	68	86.6557	88
all-unigene000831	246	gi|334187117	myosin-h heavy chain-like	1.36514e-41	92	155.221	82
all-unigene000832	211	gi|387912887	zn714_human ame: full=zinc finger protein 714	2.04075e-10	81	64.3142	44
all-unigene000833	251	gi|75251068	aux1_arath ame: full=auxin transporter protein 1 ame: full=auxin influx carrier protein 1 ame: full=polar auxin transport inhibitor-resistant protein 1	2.40063e-19	78	93.9745	64
all-unigene000834	392	gi|482571273	hypothetical protein CARUB_v10020670mg	2.41315e-07	69	53.5286	39
all-unigene000835	468	gi|38503180	pot3_arath ame: full=potassium transporter 3 short= 3 short= 4 short= 3 ame: full=tiny root hair 1 protein	9.50604e-67	85	251.906	155
all-unigene000837	269	gi|218546754	pp271_arath ame: full= pentatricopeptide repeat-containing protein at3g49142	9.94744e-13	68	72.0182	80
all-unigene000838	283	gi|48428680	rl37_mouse ame: full=60s ribosomal protein l37	1.30776e-49	100	194.512	89
all-unigene000840	217	gi|378405193	pup9_arath ame: full=probable purine permease 9 short= 9	1e-05	73	46.9802	34
all-unigene000842	396	gi|75266701	vap14_arath ame: full=vesicle-associated protein 1-4 ame: full=plant vap homolog 14 short= 14 ame: full=vamp-associated protein 1-4	1.28644e-20	67	98.2117	105
all-unigene000844	455	gi|75216958	frs3_arath ame: full=protein far1-related sequence 3	1e-05	42	34.2686	88
all-unigene000845	447	gi|20260450	dek domain-containing chromatin associated protein	6.44846e-09	86	62.003	46
all-unigene000846	368	gi|125987635	rnhx1_arath ame: full= ribonuclease h protein at1g65750	1.38411e-06	53	51.6026	77
all-unigene000847	621	gi|121933694	stu1_gibze ame: full=protein stu1	1e-05	47	39.2762	95
all-unigene000849	752	gi|30316379	roc2_arath ame: full=29 kda chloroplastic ame: full=rna-binding protein cp29 flags: precursor	1e-05	71	46.2098	49
all-unigene000850	821	gi|30316379	roc2_arath ame: full=29 kda chloroplastic ame: full=rna-binding protein cp29 flags: precursor	1e-05	71	46.2098	49
all-unigene000851	311	gi|123794815	mrfl_mouse ame: full=myelin regulatory factor-like protein	1e-05	49	33.113	65
all-unigene000852	282	gi|21542461	sr543_arath ame: full=signal recognition particle 54 kda protein 3 short=srp54	4.08421e-35	90	146.362	97
all-unigene000854	225	gi|74854445	pks23_dicdi ame: full=probable polyketide synthase 23 short=dipks23	1e-05	46	32.7278	65
all-unigene000855	1239	gi|547751	k1c17_human ame: full= type i cytoskeletal 17 ame: full= ame: full=cytokeratin-17 short=ck-17 ame: full=keratin-17 short=k17	0	100	689.108	357
all-unigene000856	233	gi|482572844	#NAME?	1.82111e-37	93	135.576	77
all-unigene000859	402	gi|3786020	polyprotein	7.07731e-20	70	90.8929	68
all-unigene000860	283	gi|21431827	plsb_arath ame: full=glycerol-3-phosphate chloroplastic short=gpat flags: precursor	1e-05	72	33.113	36
all-unigene000861	459	gi|46577102	rl23_ictpu ame: full=60s ribosomal protein l23	1.10366e-67	100	254.988	128
all-unigene000862	223	gi|357471515	ribosomal protein s4	5.28082e-10	88	61.2326	35
all-unigene000863	275	gi|75180303	3at2_arath ame: full=coumaroyl- :anthocyanidin 3-o-glucoside-6"-o-coumaroyltransferase 2	6.56863e-41	94	165.622	89
all-unigene000865	448	gi|141475	ytx2_xenla ame: full=transposon tx1 uncharacterized 149 kda protein ame: full=orf 2	7.85775e-12	55	69.3218	126
all-unigene000868	702	gi|221222527	gon1_caeel ame: full=a disintegrin and metalloproteinase with thrombospondin motifs gon-1 short=adamts gon-1 ame: full=abnormal gonad development protein 1 flags: precursor	1e-05	46	27.335	39
all-unigene000870	351	gi|6513921	AC011664_7hypothetical protein	2.28206e-16	82	82.8037	102
all-unigene000871	219	gi|297803952	hypothetical protein ARALYDRAFT_492685	3.59183e-15	76	74.7146	56
all-unigene000872	374	gi|74670951	swf1_aspfu ame: full=palmitoyltransferase swf1	1e-05	39	33.4982	61
all-unigene000876	686	gi|75319139	sd31_arath ame: full=g-type lectin s-receptor-like serine threonine-protein kinase sd3-1 ame: full=s-domain-3 receptor kinase 1 short=sd3-1 flags: precursor	1e-05	57	36.1946	54
all-unigene000874	664	gi|18266821	pol_socmv ame: full=enzymatic polyprotein includes: ame: full=aspartic protease includes: ame: full=endonuclease includes: ame: full=reverse transcriptase	1e-05	50	36.965	124
all-unigene000877	962	gi|44888115	m310_arath ame: full=uncharacterized mitochondrial protein g00310 ame: full=orf154	6.03869e-27	70	121.709	107
all-unigene000878	386	gi|75213370	p2a10_arath ame: full=protein phloem protein 2-like a10 short= 2-a10	1.8075e-29	85	90.5077	57
all-unigene000879	346	gi|75294405	bh067_arath ame: full=transcription factor bhlh67 ame: full=basic helix-loop-helix protein 67 short= 67 short=bhlh 67 ame: full=transcription factor en 11 ame: full=bhlh transcription factor bhlh067	5.51294e-40	75	162.54	132
all-unigene000881	390	gi|148887181	nsun2_mouse ame: full=trna (cytosine -c )-methyltransferase ame: full=myc-induced sun domain-containing protein short=misu ame: full=nol1 nop2 sun domain family member 2	1e-05	45	47.3654	159
all-unigene000882	390	gi|75315975	u85a2_arath ame: full=udp-glycosyltransferase 85a2	2.95516e-54	89	209.92	129
all-unigene000883	328	gi|75274163	apg2_arath ame: full=gdsl esterase lipase apg ame: full=extracellular lipase apg flags: precursor	7.11426e-28	73	121.324	96
all-unigene000887	206	gi|297853244	hypothetical protein ARALYDRAFT_892534	2.57921e-16	85	76.2554	49
all-unigene000886	515	gi|125991831	cyt5_arath ame: full=cysteine proteinase inhibitor 5 short= -5 flags: precursor	2.03211e-29	76	128.257	100
all-unigene000892	272	gi|334305794	gh101_rensm ame: full= endo-alpha-n-acetylgalactosaminidase flags: precursor	1e-05	44	32.7278	56
all-unigene000890	222	gi|75157524	taf1a_arath ame: full=transcription initiation factor tfiid subunit 1-a short= 1a ame: full=tafii250-a	6.25725e-28	91	122.479	73
all-unigene000893	853	gi|300669710	finc_human ame: full=fibronectin short=fn ame: full=cold-insoluble globulin short=cig contains: ame: full=anastellin contains: ame: full=ugl-y1 contains: ame: full=ugl-y2 contains: ame: full=ugl-y3 flags: precursor	3.59081e-158	90	557.37	283
all-unigene000898	264	gi|75166171	lcb1_arath ame: full=long chain base biosynthesis protein 1 short= 1 ame: full=protein embryo defective 2779 ame: full=protein fumonisin b1 resistant 11	2.30136e-06	82	50.8322	34
all-unigene000900	395	gi|146291076	yi31b_yeast ame: full=transposon ty3-i gag-pol polyprotein ame: full=gag3-pol3 ame: full=transposon ty3-2 tya-tyb polyprotein contains: ame: full=capsid protein short=ca ame: full=p24 contains: ame: full=spacer peptide p3 contains: ame: full=nucleocapsid protein p11 short=nc contains: ame: full=ty3 protease short=pr ame: full=p16 contains: ame: full=spacer peptide j contains: ame: full=reverse tr…	1.86871e-11	50	67.781	101
all-unigene000901	502	gi|75265910	mao1_arath ame: full=nad-dependent malic enzyme mitochondrial short= -me1 short=nad-malic enzyme 1 flags: precursor	6.15137e-14	78	72.7886	51
all-unigene000902	329	gi|75318540	lrx1_arath ame: full=leucine-rich repeat extensin-like protein 1 short= 1 short=lrr extensin1 ame: full=cell wall hydroxyproline-rich glycoprotein flags: precursor	7.80863e-55	97	211.846	108
all-unigene000903	349	gi|75170345	pp367_arath ame: full=pentatricopeptide repeat-containing protein at5g06540	1e-05	43	33.8834	130
all-unigene000905	276	gi|122214367	pub48_arath ame: full=u-box domain-containing protein 48 ame: full=plant u-box protein 48	2.77009e-15	76	80.4925	55
all-unigene000907	225	gi|15213963	dcam_vicfa ame: full=s-adenosylmethionine decarboxylase proenzyme short= etdc short=samdc contains: ame: full=s-adenosylmethionine decarboxylase alpha chain contains: ame: full=s-adenosylmethionine decarboxylase beta chain flags: precursor	1e-05	63	44.2838	55
all-unigene000908	324	gi|33517116	y964_thema ame: full=upf0272 protein tm_0964	1e-05	50	33.4982	70
all-unigene000910	206	gi|75264349	fbl60_arath ame: full=f-box lrr-repeat protein at3g58940	4.56321e-18	85	89.7373	56
all-unigene000911	358	gi|75100789	bgl25_arath ame: full=probable inactive beta-glucosidase 25 short= 25 flags: precursor	1.10058e-24	94	111.694	56
all-unigene000912	602	gi|334302925	c3h55_arath ame: full=zinc finger ccch domain-containing protein 55 short= 3h55	8.42302e-29	55	126.716	194
all-unigene000913	623	gi|334302925	c3h55_arath ame: full=zinc finger ccch domain-containing protein 55 short= 3h55	1.07324e-29	55	129.798	187
all-unigene000914	308	gi|297842053	uncharacterized loc101210661	4.62088e-61	97	202.216	102
all-unigene000916	256	gi|1173027	rl31_nicgu ame: full=60s ribosomal protein l31	5.88075e-26	78	115.931	82
all-unigene000917	273	gi|30678728	protein kinase adk1-like protein	4.52087e-31	77	122.094	103
all-unigene000920	555	gi|116242511	hirp3_human ame: full=hira-interacting protein 3	1e-05	56	37.3502	66
all-unigene000921	274	gi|297791129	hypothetical protein ARALYDRAFT_494397	2.3506e-24	83	103.605	67
all-unigene000922	242	gi|75337308	mpk20_arath ame: full=mitogen-activated protein kinase 20 short= 20 short=map kinase 20	1.85109e-27	82	120.939	81
all-unigene000923	211	gi|482571288	at1g68440 t2e12_1	9.75981e-11	75	63.929	56
all-unigene000925	226	gi|45477166	pbs1_arath ame: full=serine threonine-protein kinase pbs1 ame: full= phb susceptible protein 1	2.0703e-23	79	107.457	73
all-unigene000926	316	gi|15220713	mitochondrial transcription termination factor family protein	2.82198e-11	64	67.781	59
all-unigene000928	708	gi|75268203	fb52_arath ame: full= f-box protein at1g50870	3.47012e-33	61	141.739	170
all-unigene000929	210	gi|15227917	uncharacterized loc101209235	1.12035e-15	93	75.0998	43
all-unigene000930	428	gi|141475	ytx2_xenla ame: full=transposon tx1 uncharacterized 149 kda protein ame: full=orf 2	1.67161e-10	50	64.6994	148
all-unigene000932	293	gi|313471496	rlk1_arath ame: full=g-type lectin s-receptor-like serine threonine-protein kinase rlk1 ame: full=receptor-like protein kinase 1 flags: precursor	1.39655e-19	76	94.7449	78
all-unigene000933	438	gi|46395603	drl16_arath ame: full=probable disease resistance protein at1g61190	5.74479e-20	72	96.2857	81
all-unigene000936	229	gi|357529069	ulp2b_arath ame: full=probable ubiquitin-like-specific protease 2b	1.99447e-26	82	117.472	76
all-unigene000937	282	gi|75273371	pp246_arath ame: full=pentatricopeptide repeat-containing protein chloroplastic flags: precursor	5.33901e-43	97	172.555	92
all-unigene000938	317	gi|160380525	5ntc_mouse ame: full=cytosolic purine 5 -nucleotidase ame: full=cytosolic 5 -nucleotidase ii	4.54658e-10	55	63.1586	106
all-unigene000941	267	gi|15214057	lipa_mycpu ame: full=lipoprotein a flags: precursor	1e-05	51	36.1946	74
all-unigene000940	376	gi|2498731	p1_arath ame: full=nadp-dependent alkenal double bond reductase p1 short=dbr1	5.50868e-40	93	162.54	91
all-unigene000944	505	gi|189044059	rrf_kinrd ame: full=ribosome-recycling factor short=rrf ame: full=ribosome-releasing factor	1e-05	52	35.039	76
all-unigene000945	283	gi|71153422	xsp1_arath ame: full=xylem serine proteinase 1 short= 1 ame: full=cucumisin-like protein flags: precursor	1e-05	47	48.1358	120
all-unigene000947	232	gi|75335407	ab17b_arath ame: full=abc transporter b family member 17 short=abc transporter short= 17 ame: full=p-glycoprotein 17 ame: full= multidrug resistance protein 19	1.05845e-30	94	131.724	77
all-unigene000948	613	gi|482553577	hypothetical protein CARUB_v10006159mg	1e-05	68	49.2914	47
all-unigene000949	406	gi|4325364	rna-directed dna polymerase (reverse transcriptase)-related protein	9.1071e-08	63	58.5362	60
all-unigene000950	223	gi|75277347	chx13_arath ame: full=cation h(+) symporter 13 ame: full=protein cation h+ exchanger 13 short= 13	4.95791e-25	86	112.849	73
all-unigene000951	252	gi|75277347	chx13_arath ame: full=cation h(+) symporter 13 ame: full=protein cation h+ exchanger 13 short= 13	1.70707e-33	91	140.969	84
all-unigene000952	341	gi|75281787	rab1b_arath ame: full=ras-related protein rabb1b short= 1b ame: full=ras-related protein gb2 short= 2 ame: full=ras-related protein rab2c short= ab2c	1.01869e-17	93	88.5817	48
all-unigene000953	349	gi|75100697	y4117_arath ame: full= disease resistance protein at4g11170	8.2669e-12	47	68.9366	152
all-unigene000956	399	gi|482572243	plant thionin family protein	1.64867e-18	79	83.9593	77
all-unigene000958	247	gi|21431834	surf1_mouse ame: full=surfeit locus protein 1	1e-05	54	32.7278	48
all-unigene000959	340	gi|414876237	hat family dimerization domain protein	2.88041e-24	79	79.7221	68
all-unigene000961	493	gi|74834527	gnra_dicdi ame: full=gelsolin-related protein of 125 kda short=grp125	1.79282e-08	51	58.5362	165
all-unigene000963	371	gi|75165202	rpkl_arath ame: full=receptor protein kinase-like protein at4g34220 flags: precursor	1.68209e-12	70	71.2478	61
all-unigene000965	286	gi|75317972	y2232_arath ame: full=probable receptor-like protein kinase at2g23200 flags: precursor	3.23611e-32	86	136.732	94
all-unigene000970	358	gi|8778245	retroelement pol polyprotein	2.05225e-19	60	92.4337	116
all-unigene000971	214	gi|158828306	gag-pol polymerase	2.5993e-22	76	97.8265	71
all-unigene000967	377	gi|21542303	yb95_arath ame: full=uncharacterized protein mitochondrial flags: precursor	1.12031e-08	49	58.5362	124
all-unigene000968	372	gi|74750922	cx062_human ame: full= uncharacterized protein encoded by linc00269	5.66924e-28	82	98.2117	62
all-unigene000972	297	gi|109940162	rs8_orysj ame: full=40s ribosomal protein s8	2.36109e-27	95	120.553	65
all-unigene000977	304	gi|334302851	rlp12_arath ame: full=receptor-like protein 12 short= 12 flags: precursor	5.15549e-12	62	63.5438	80
all-unigene000979	312	gi|123620427	isph_promt ame: full=4-hydroxy-3-methylbut-2-enyl diphosphate reductase	1e-05	42	33.113	66
all-unigene000983	321	gi|166977691	se1ba_danre ame: full=histone-lysine n-methyltransferase setd1b-a ame: full=set domain-containing protein 1b-a	1e-05	48	32.7278	56
all-unigene000984	333	gi|79325293	gcn5-related n-acetyltransferase family protein	2.62936e-43	85	152.525	96
all-unigene000985	280	gi|75157524	taf1a_arath ame: full=transcription initiation factor tfiid subunit 1-a short= 1a ame: full=tafii250-a	7.9781e-39	89	158.688	93
all-unigene000986	338	gi|1346520	metk1_braju ame: full=s-adenosylmethionine synthase 1 short= et synthase 1 ame: full=methionine adenosyltransferase 1 short=mat 1	1e-05	60	40.817	38
all-unigene000987	272	gi|20532086	esca_arath ame: full= dna-binding protein escarola	1e-05	45	36.965	98
all-unigene000990	670	gi|18202046	ebp_arath ame: full=probable 3-beta-hydroxysteroid-delta -isomerase ame: full=cholestenol delta-isomerase ame: full=delta -delta sterol isomerase short=d8-d7 sterol isomerase	6.22204e-84	92	292.352	163
all-unigene000988	347	gi|482558947	non-ltr retroelement reverse transcriptase	5.60047e-19	61	87.4261	110
all-unigene000992	234	gi|75334109	y5596_arath ame: full=probable lrr receptor-like serine threonine-protein kinase at5g59680 flags: precursor	5.82141e-21	77	99.3673	70
all-unigene000994	1459	gi|75308849	y3236_arath ame: full=ankyrin repeat-containing protein at3g12360	4.3475e-12	44	73.1738	245
all-unigene000996	531	gi|297850140	transcription initiation factor tfiid subunit a	2.71631e-18	81	91.2781	72
all-unigene000997	371	gi|482560991	non-ltr retroelement reverse transcriptase	1.06312e-10	60	65.4698	101
all-unigene000998	311	gi|254782315	pksr_bacsu ame: full=polyketide synthase	1e-05	62	33.4982	37
all-unigene001000	423	gi|123146012	dapa_clops ame: full=4-hydroxy-tetrahydrodipicolinate synthase short=htpa synthase	1e-05	57	34.2686	42
all-unigene001001	348	gi|73622092	str4_arath ame: full=rhodanese-like domain-containing protein chloroplastic ame: full=protein thylakoid rhodanese-like ame: full=sulfurtransferase 4 short= tr4 flags: precursor	3.83122e-17	58	86.6557	123
all-unigene001003	215	gi|75219164	y2045_arath ame: full= btb poz domain-containing protein at2g40450	9.451e-08	65	55.4546	47
all-unigene001005	302	gi|218546778	pp144_arath ame: full=pentatricopeptide repeat-containing protein at2g02750	9.85961e-45	92	178.333	99
all-unigene001006	875	gi|123778447	mcm10_mouse ame: full=protein mcm10 homolog	1e-05	48	35.4242	82
all-unigene001008	401	gi|166216087	cnot1_mouse ame: full=ccr4-not transcription complex subunit 1 ame: full=ccr4-associated factor 1	1.46993e-08	68	58.151	66
all-unigene001009	419	gi|313104077	ats8_human ame: full=a disintegrin and metalloproteinase with thrombospondin motifs 8 short=adam-ts 8 short=adam-ts8 short=adamts-8 ame: full=meth-2 ame: full=meth-8 flags: precursor	1e-05	44	33.8834	68
all-unigene001011	620	gi|75332091	hdg2_arath ame: full=homeobox-leucine zipper protein hdg2 ame: full=hd-zip protein hdg2 ame: full=homeodomain glabra 2-like protein 2 ame: full=homeodomain transcription factor hdg2 ame: full=protein homeodomain glabrous 2	2.68208e-57	70	221.476	207
all-unigene001012	396	gi|461812	c72a1_catro ame: full=secologanin synthase short=sls ame: full=cyplxxii ame: full=cytochrome p450 72a1	2.06131e-18	88	90.8929	60
all-unigene001016	312	gi|297848560	rna recognition motif-containing protein	1.44169e-16	80	82.8037	86
all-unigene001018	259	gi|297850746	cyclin-d1-binding protein 1 homolog	2.5213e-40	87	145.976	87
all-unigene001019	319	gi|14285348	at2b2_oremo ame: full=plasma membrane calcium-transporting atpase 2 short=pmca2 ame: full=plasma membrane calcium atpase isoform 2 ame: full=plasma membrane calcium pump isoform 2	1e-05	50	33.113	52
all-unigene001020	428	gi|269969439	bgl27_arath ame: full=beta-glucosidase 27 short= 27	4.46855e-72	95	269.24	142
all-unigene001021	228	gi|150421542	drts2_arath ame: full=bifunctional dihydrofolate reductase-thymidylate synthase 2 short=dhfr-ts 2 includes: ame: full=dihydrofolate reductase includes: ame: full=thymidylate synthase	6.67037e-06	51	49.2914	79
all-unigene001023	241	gi|75174713	b3gt5_arath ame: full=probable beta- -galactosyltransferase 5	2.80918e-14	91	73.9442	35
all-unigene001024	373	gi|482557739	histidine-containing phosphotransmitter 2	8.10141e-11	55	34.6538	52
all-unigene001025	344	gi|75317773	y4200_arath ame: full=uncharacterized protein at4g02000	1e-05	46	32.3426	63
all-unigene001026	625	gi|90110783	ttc16_human ame: full=tetratricopeptide repeat protein 16 short=tpr repeat protein 16	1e-05	43	35.039	119
all-unigene001027	270	gi|193806545	tvp38_scls1 ame: full=golgi apparatus membrane protein tvp38	1e-05	62	34.2686	40
all-unigene001029	201	gi|297793113	hypothetical protein ARALYDRAFT_495709	5.64315e-09	91	60.077	34
all-unigene001030	355	gi|46577447	sina3_arath ame: full=e3 ubiquitin-protein ligase sinat3 ame: full=seven in absentia homolog 3	1.35321e-14	86	78.1814	51
all-unigene001031	275	gi|89257510	dna binding protein	1.75089e-11	62	66.6254	81
all-unigene001034	215	gi|114421	atpbm_nicpl ame: full=atp synthase subunit mitochondrial flags: precursor	3.02621e-22	92	103.605	57
all-unigene001035	204	gi|8809605	ac079679_3reverse 16838-20266	6.88366e-13	64	70.0922	67
all-unigene001037	527	gi|380876885	fb264_arath ame: full=f-box protein at5g36730	1e-05	66	48.1358	56
all-unigene001039	585	gi|14286045	ycxc_astlo ame: full=uncharacterized kda protein in rps4-rps11 intergenic region ame: full=orf426	1e-05	47	38.5058	84
all-unigene001040	248	gi|378548405	med13_arath ame: full=mediator of rna polymerase ii transcription subunit 13 ame: full=protein grand central ame: full=protein macchi-bou 2	6.35197e-12	85	69.3218	40
all-unigene001041	460	gi|115916	cdka1_arath ame: full=cyclin-dependent kinase a-1 short=cdka 1 ame: full=cell division control protein 2 homolog a	3.97114e-25	91	113.62	62
all-unigene001043	273	gi|442803220	nadh-ubiquinone oxidoreductase chain	4.14461e-25	97	100.138	49
all-unigene001049	760	gi|27735258	sytm_arath ame: full=threonine--trna mitochondrial ame: full=threonyl-trna synthetase short= flags: precursor	6.47024e-90	82	192.2	129
all-unigene001048	292	gi|482550545	hypothetical protein CARUB_v10028032mg	1.85586e-11	68	68.5514	64
all-unigene001050	250	gi|75264274	fb295_arath ame: full= f-box protein at5g60060	2.24874e-25	74	114.005	82
all-unigene001057	286	gi|325529999	aria_arath ame: full=arm repeat protein interacting with abf2 short=aria	4.3394e-45	96	179.489	95
all-unigene001055	206	gi|15221330	snare associated golgi family protein	2.54893e-11	97	65.4698	35
all-unigene001056	402	gi|353558700	g3r_var67 ame: full=ankyrin repeat protein g3r	1e-05	60	33.8834	50
all-unigene001059	330	gi|14285691	ptmcb_mycpn ame: full=pts system mannitol-specific eiicb component ame: full=eiicb-mtl short=eii-mtl includes: ame: full=mannitol permease iic component ame: full=pts system mannitol-specific eiic component includes: ame: full=mannitol-specific phosphotransferase enzyme iib component ame: full=pts system mannitol-specific eiib component	1e-05	57	34.6538	40
all-unigene001061	206	gi|75313142	oct5_arath ame: full=organic cation carnitine transporter 5 short= 5	1.08807e-21	94	89.7373	50
all-unigene001063	452	gi|4038057	en spm-like transposon protein	1.01463e-60	85	209.92	128
all-unigene001065	372	gi|123869421	nsp2_rot41 ame: full=non-structural protein 2 short=nsp2 ame: full=ncvp3 ame: full=non-structural rna-binding protein 35 short=ns35	1e-05	56	32.7278	55
all-unigene001066	215	gi|1171978	pabp2_arath ame: full=polyadenylate-binding protein 2 short=pabp-2 short=poly -binding protein 2	1.8955e-24	85	110.923	71
all-unigene001073	599	gi|130582	polx_tobac ame: full=retrovirus-related pol polyprotein from transposon tnt 1-94 includes: ame: full=protease includes: ame: full=reverse transcriptase includes: ame: full=endonuclease	1.29086e-13	52	76.2554	145
all-unigene001076	287	gi|42566517	yth family protein	1e-05	60	48.1358	55
all-unigene001077	245	gi|75335408	ab16b_arath ame: full=abc transporter b family member 16 short=abc transporter short= 16 ame: full=multidrug resistance protein 18 ame: full=p-glycoprotein 16	1.56944e-10	58	64.6994	74
all-unigene001078	651	gi|78103363	tref1_mouse ame: full=transcriptional-regulating factor 1 ame: full=transcriptional-regulating protein 132 ame: full=zinc finger transcription factor t -132	1e-05	44	35.039	99
all-unigene001079	255	gi|341940866	kcnh7_mouse ame: full=potassium voltage-gated channel subfamily h member 7 ame: full=ether-a-go-go-related gene potassium channel 3 short=erg-3 short=eag-related protein 3 short=ether-a-go-go-related protein 3 ame: full=voltage-gated potassium channel subunit	1e-05	70	33.4982	34
all-unigene001083	334	gi|317412016	pex7_arath ame: full=peroxisome biogenesis protein 7 ame: full=peroxin-7 short= 7 ame: full=peroxisomal targeting signal type 2 receptor ame: full=pex7p	4.25956e-56	97	216.083	111
all-unigene001084	398	gi|118572306	f105b_mouse ame: full=protein fam105b	1e-05	53	33.113	54
all-unigene001085	306	gi|75161418	ppd2_arath ame: full= domain-containing protein chloroplastic ame: full= -related thylakoid lumenal protein 3 flags: precursor	7.06837e-19	76	92.4337	69
all-unigene001087	463	gi|9972409	kcy_deira ame: full=cytidylate kinase short=ck ame: full=cytidine monophosphate kinase short=cmp kinase	1e-05	48	35.039	62
all-unigene001088	558	gi|264664537	y5487_arath ame: full=probable lrr receptor-like serine threonine-protein kinase at5g48740 flags: precursor	8.93275e-74	94	226.483	124
all-unigene001092	318	gi|334302851	rlp12_arath ame: full=receptor-like protein 12 short= 12 flags: precursor	3.47313e-18	55	90.1225	118
all-unigene001093	1002	gi|73920131	trnh1_arath ame: full=tropinone reductase homolog at1g07440	1.32741e-56	78	220.32	166
all-unigene001096	442	gi|21542422	metb_arath ame: full=cystathionine gamma- chloroplastic short=cgs ame: full=o-succinylhomoserine -lyase flags: precursor	4.19181e-71	95	266.159	146
all-unigene001094	307	gi|261277918	tpst_arath ame: full=protein-tyrosine sulfotransferase ame: full=tyrosylprotein sulfotransferase flags: precursor	1e-05	61	38.1206	44
all-unigene001095	376	gi|74669971	cwc22_aspfu ame: full=pre-mrna-splicing factor cwc22	1e-05	50	35.039	80
all-unigene001097	249	gi|75262680	p2b12_arath ame: full= f-box protein pp2-b12 ame: full=protein phloem protein 2-like b12 short= 2-b12	1.31422e-25	82	114.775	81
all-unigene001098	302	gi|482565069	retrotransposon unclassified	1.64448e-46	89	160.999	93
all-unigene001099	377	gi|75303639	ubc5b_orysj ame: full=ubiquitin-conjugating enzyme e2 5b ame: full=ubiquitin carrier protein 5b short= 5b ame: full=ubiquitin-protein ligase 5b	2.31441e-38	100	157.147	74
all-unigene001100	565	gi|75317773	y4200_arath ame: full=uncharacterized protein at4g02000	1.26692e-20	56	99.3673	133
all-unigene001101	527	gi|50403746	cnbp_mouse ame: full=cellular nucleic acid-binding protein short=cnbp ame: full=zinc finger protein 9	1e-05	50	35.039	58
all-unigene001102	214	gi|6174956	rl7a1_arath ame: full=60s ribosomal protein l7a-1	7.47113e-13	100	72.4034	35
all-unigene001103	341	gi|218546770	pp184_arath ame: full=pentatricopeptide repeat-containing protein at2g34400	1.5571e-50	92	197.593	113
all-unigene001104	391	gi|48427910	dre2b_arath ame: full=dehydration-responsive element-binding protein 2b short=protein dreb2b	2.79173e-20	65	97.0561	95
all-unigene001105	317	gi|410591668	fbt9_arath ame: full=probable folate-biopterin transporter chloroplastic flags: precursor	2.38854e-43	96	173.711	88
all-unigene001106	275	gi|357529499	heat1_arath ame: full=uncharacterized protein at3g06530	4.87139e-36	92	149.443	93
all-unigene001107	270	gi|297830792	rna recognition motif-containing protein	1.93903e-09	77	61.6178	44
all-unigene001109	241	gi|6225291	efp1_chltr ame: full=elongation factor p 1 short=ef-p 1	1e-05	60	34.2686	43
all-unigene001112	658	gi|281185495	tena_human ame: full=tenascin short=tn ame: full=cytotactin ame: full=gmem ame: full=gp 150-225 ame: full=glioma-associated-extracellular matrix antigen ame: full=hexabrachion ame: full=ji ame: full=myotendinous antigen ame: full=neuronectin ame: full=tenascin-c short=tn-c flags: precursor	7.1627e-59	100	226.868	103
all-unigene001116	208	gi|255548870	traf-like protein	2.89997e-23	87	102.064	56
all-unigene001119	209	gi|75181119	gh312_arath ame: full=4-substituted benzoates-glutamate ligase ame: full=auxin-responsive gh3-like protein 12 short= 3-12 ame: full=protein gh3-like defense gene 1 ame: full=protein gretchen hagen ame: full=protein hopw1-1-interacting 3 ame: full=protein avrpphb susceptible 3	1.73282e-09	64	61.2326	73
all-unigene001122	260	gi|75274006	pp240_arath ame: full=pentatricopeptide repeat-containing protein at3g18020	7.12694e-32	80	135.576	86
all-unigene001123	275	gi|15228467	pwwp domain-containing protein	1.9451e-27	86	114.39	74
all-unigene001127	741	gi|75301658	rng1l_arath ame: full=e3 ubiquitin-protein ligase ring1-like ame: full=ring finger protein 1	1e-05	53	50.0618	73
all-unigene001128	251	gi|297797117	hypothetical protein ARALYDRAFT_919404	4.88543e-07	72	55.4546	47
all-unigene001130	321	gi|45477070	m1250_arath ame: full=uncharacterized mitochondrial protein g01250 ame: full=orf102	3.13807e-11	70	67.0106	57
all-unigene001133	386	gi|74635341	alg10_yarli ame: full=dol-p-glc:glc man c -pp-dol alpha- -glucosyltransferase ame: full=alpha- -glucosyltransferase alg10-a ame: full=alpha-2-glucosyltransferase alg10 ame: full=asparagine-linked glycosylation protein 10 ame: full=dolichyl-phosphoglucose-dependent glucosyltransferase alg10	1e-05	47	32.7278	90
all-unigene001138	534	gi|374095384	drl4_arath ame: full= disease resistance protein at1g50180	1.36885e-34	71	145.591	128
all-unigene001134	438	gi|75015734	smc2_plaf7 ame: full=structural maintenance of chromosomes protein 2	1e-05	39	33.8834	137
all-unigene001135	272	gi|113514	sep2_arath ame: full=developmental protein sepallata 2 ame: full=agamous-like mads-box protein agl4	1.24276e-39	98	161.384	82
all-unigene001136	309	gi|123768675	dnaa_suldn ame: full=chromosomal replication initiator protein	1e-05	55	33.113	68
all-unigene001137	483	gi|24636264	capp1_arath ame: full=phosphoenolpyruvate carboxylase 1 short= 1 short=pepc 1 short=pepcase 1 ame: full=107-kda pepc polypeptide	2.08228e-70	84	264.233	161
all-unigene001139	406	gi|332278202	iqd32_arath ame: full=protein iq-domain 32	1e-05	60	35.4242	58
all-unigene001140	1491	gi|125987635	rnhx1_arath ame: full= ribonuclease h protein at1g65750	6.23528e-22	43	105.916	348
all-unigene001141	1389	gi|125987635	rnhx1_arath ame: full= ribonuclease h protein at1g65750	2.652e-19	41	97.0561	341
all-unigene001145	324	gi|115444	s10a9_human ame: full=protein s100-a9 ame: full=calgranulin-b ame: full=calprotectin l1h subunit ame: full=leukocyte l1 complex heavy chain ame: full=migration inhibitory factor-related protein 14 short=mrp-14 short=p14 ame: full=s100 calcium-binding protein a9	9.28662e-56	100	214.927	101
all-unigene001148	253	gi|51316539	rha1b_arath ame: full=e3 ubiquitin-protein ligase rha1b ame: full=ring-h2 zinc finger protein rha1b	4.98991e-17	100	86.2705	40
all-unigene001149	410	gi|75262477	gstt3_arath ame: full=glutathione s-transferase t3 short= 3 ame: full=gst class-theta member 3 ame: full=glutathione s-transferase 10c	1.83484e-11	70	67.781	70
all-unigene001150	384	gi|129365	p4ha1_chick ame: full=prolyl 4-hydroxylase subunit alpha-1 short=4-ph alpha-1 ame: full=procollagen- -oxoglutarate-4-dioxygenase subunit alpha-1	1.35973e-06	63	51.6026	47
all-unigene001151	312	gi|122142813	i2bpl_macmu ame: full=interferon regulatory factor 2-binding ame: full=enhanced at puberty protein 1	1e-05	48	38.5058	72
all-unigene001152	280	gi|47605622	dre1b_arath ame: full=dehydration-responsive element-binding protein 1b short=protein dreb1b ame: full=c-repeat dehydration-responsive element-binding factor 1 short=c-repeat-binding factor 1 short=crt dre-binding factor 1	3.9779e-22	83	103.219	61
all-unigene001153	371	gi|45477070	m1250_arath ame: full=uncharacterized mitochondrial protein g01250 ame: full=orf102	6.61463e-09	63	59.3066	60
all-unigene001154	308	gi|223635845	y4177_arath ame: full=uncharacterized protein at4g17700	3.51614e-10	58	63.5438	87
all-unigene001156	273	gi|146291076	yi31b_yeast ame: full=transposon ty3-i gag-pol polyprotein ame: full=gag3-pol3 ame: full=transposon ty3-2 tya-tyb polyprotein contains: ame: full=capsid protein short=ca ame: full=p24 contains: ame: full=spacer peptide p3 contains: ame: full=nucleocapsid protein p11 short=nc contains: ame: full=ty3 protease short=pr ame: full=p16 contains: ame: full=spacer peptide j contains: ame: full=reverse tr…	1e-05	58	37.7354	53
all-unigene001158	525	gi|75213515	pp338_arath ame: full=pentatricopeptide repeat-containing protein mitochondrial flags: precursor	4.66969e-85	95	313.153	174
all-unigene001160	389	gi|297797189	embryo-specific protein 3	3.91713e-13	85	72.0182	49
all-unigene001161	549	gi|264664501	y2242_arath ame: full=probable lrr receptor-like serine threonine-protein kinase at2g24230 flags: precursor	2.42127e-90	95	330.872	183
all-unigene001163	413	gi|122223794	ski17_arath ame: full=f-box protein skip17 ame: full=skp1-interacting partner 17	1e-05	55	38.891	52
all-unigene001164	576	gi|75306451	h2a5_arath ame: full=probable histone ame: full=hta7	1.47599e-11	69	69.3218	62
all-unigene001168	318	gi|209572659	pex12_arath ame: full=peroxisome biogenesis protein 12 ame: full=peroxin-12 short= 12 ame: full=pex12p ame: full=protein aberrant peroxisome morphology 4	8.85264e-14	82	75.485	47
all-unigene001170	402	gi|417745	sahh_wheat ame: full=adenosylhomocysteinase short= cyase ame: full=s-adenosyl-l-homocysteine hydrolase	1.71238e-57	97	220.705	111
all-unigene001169	505	gi|482555960	accelerated cell death 6	3.65904e-27	72	116.316	96
all-unigene001174	361	gi|317373381	lins_arath ame: full=s-(+)-linalool chloroplastic ame: full=terpenoid synthase 14 short= 14 flags: precursor	6.2132e-28	58	122.479	168
all-unigene001178	304	gi|75334109	y5596_arath ame: full=probable lrr receptor-like serine threonine-protein kinase at5g59680 flags: precursor	1.9801e-45	92	180.644	101
all-unigene001179	242	gi|313471776	y1670_arath ame: full=probable receptor-like protein kinase at1g67000 flags: precursor	3.87771e-09	69	60.077	53
all-unigene001180	371	gi|482572417	alpha beta fold family protein	1.29459e-14	92	76.6406	42
all-unigene001181	383	gi|81889420	tri35_rat ame: full=tripartite motif-containing protein 35	1e-05	48	32.3426	86
all-unigene001189	423	gi|75210846	fk103_arath ame: full= f-box kelch-repeat protein at4g39600	9.24872e-19	52	92.0485	138
all-unigene001193	239	gi|297806949	hypothetical protein ARALYDRAFT_325471	1e-05	53	43.8986	58
all-unigene001196	385	gi|81964784	movp_mrfvc ame: full= movement protein	1e-05	50	32.7278	66
all-unigene001197	248	gi|209572766	ads32_arath ame: full=probable lipid desaturase chloroplastic flags: precursor	1.19793e-10	88	65.0846	35
all-unigene001198	456	gi|416642	arg7_phaau ame: full=indole-3-acetic acid-induced protein arg7	9.09185e-11	60	65.855	68
all-unigene001201	261	gi|74731522	mter1_human ame: full=mterf domain-containing protein mitochondrial ame: full=mitochondrial transcription termination factor 3 short=mterf3 flags: precursor	1e-05	55	33.4982	49
all-unigene001203	211	gi|13878371	c71bd_arath ame: full=cytochrome p450 71b13	5.71123e-29	92	125.946	70
all-unigene001204	238	gi|81910895	sf3b4_rat ame: full=splicing factor 3b subunit 4	8.94658e-14	93	75.485	45
all-unigene001205	352	gi|81889643	nanog_musmm ame: full=homeobox protein nanog ame: full=homeobox transcription factor nanog	1e-05	40	33.8834	67
all-unigene001206	397	gi|135915	pr5_arath ame: full=pathogenesis-related protein 5 short=pr-5 flags: precursor	5.19872e-38	73	155.992	119
all-unigene001207	428	gi|122277669	rl9_oenob ame: full=50s ribosomal protein l9	1e-05	60	32.3426	45
all-unigene001208	616	gi|74851903	arv1_dicdi ame: full=protein arv1 homolog	5.55145e-07	53	54.299	123
all-unigene001209	376	gi|482571337	ring zinc finger protein	1.74933e-08	80	58.9214	40
all-unigene001214	324	gi|125987635	rnhx1_arath ame: full= ribonuclease h protein at1g65750	6.94395e-11	72	65.855	54
all-unigene001211	237	gi|482571156	uncharacterized partial	1.6827e-27	95	110.923	60
all-unigene001213	208	gi|357529491	isw2_arath ame: full= chromatin-remodeling complex atpase chain ame: full=isw2-like ame: full=sucrose nonfermenting protein 2 homolog	3.5881e-31	100	133.265	69
all-unigene001215	306	gi|75333381	hen1_arath ame: full=small rna 2 -o-methyltransferase ame: full=protein corymbosa 2 ame: full=protein hua enhancer 1 ame: full=s-adenosylmethionine-dependent rna methyltransferase hen1	3.75168e-28	91	123.25	68
all-unigene001216	281	gi|224493147	mpip1_bovin ame: full=m-phase inducer phosphatase 1 ame: full=dual specificity phosphatase cdc25a	1e-05	52	35.039	63
all-unigene001217	297	gi|82192787	mt12b_danre ame: full=monocarboxylate transporter 12-b short=mct 12-b ame: full=solute carrier family 16 member 12-b	1e-05	46	33.4982	86
all-unigene001218	458	gi|75100554	rl281_arath ame: full=60s ribosomal protein l28-1	5.21654e-46	82	182.956	136
all-unigene001219	401	gi|74657573	prp5_emeni ame: full=pre-mrna-processing atp-dependent rna helicase prp5	1e-05	49	34.6538	61
all-unigene001222	257	gi|363548411	fbd19_arath ame: full= fbd-associated f-box protein at5g50270	3.76242e-13	67	51.2174	49
all-unigene001223	248	gi|4309765	retroelement pol polyprotein	1.83867e-23	74	103.219	82
all-unigene001226	367	gi|75192354	nga3_arath ame: full=b3 domain-containing transcription factor nga3 ame: full=protein ngatha3	2.67011e-42	76	170.244	125
all-unigene001227	476	gi|15240177	protein	3.84997e-65	86	224.942	160
all-unigene001228	284	gi|75070443	grp78_ponab ame: full=78 kda glucose-regulated protein short=grp-78 ame: full=heat shock 70 kda protein 5 flags: precursor	7.17594e-48	100	188.734	94
all-unigene001230	511	gi|74861126	y8707_dicdi ame: full= uncharacterized protein ddb_g0272194	1e-05	39	33.8834	87
all-unigene001231	281	gi|41017238	glr37_arath ame: full=glutamate receptor ame: full=ionotropic glutamate receptor glr5 ame: full=ligand-gated ion channel flags: precursor	3.58121e-39	96	159.844	89
all-unigene001232	343	gi|75263138	hdg11_arath ame: full=homeobox-leucine zipper protein hdg11 ame: full=hd-zip protein hdg11 ame: full=homeodomain glabra 2-like protein 11 ame: full=homeodomain transcription factor hdg11 ame: full=protein homeodomain glabrous 11	1.11724e-32	97	138.272	68
all-unigene001233	252	gi|112717	21kd_dauca ame: full=21 kda protein ame: full= protein flags: precursor	1e-05	65	47.3654	46
all-unigene001234	410	gi|731973	tok1_yeast ame: full=outward-rectifier potassium channel tok1 ame: full=two-domain outward rectifier k(+) channel york	1e-05	52	33.4982	51
all-unigene001236	268	gi|482576306	phosphatidylinositol-4-phosphate 5-kinase	2.31793e-28	88	114.39	75
all-unigene001238	289	gi|75273243	aspg2_arath ame: full=protein aspartic protease in guard cell 2 short= 2 flags: precursor	5.52251e-08	47	56.225	97
all-unigene001239	335	gi|71159388	gpat6_arath ame: full=glycerol-3-phosphate 2-o-acyltransferase 6 short= 6 ame: full=glycerol-3-phosphate acyltransferase 6	3.27659e-40	93	163.31	94
all-unigene001240	329	gi|15228710	endonuclease or glycosyl hydrolase	5.99042e-12	65	68.1662	79
all-unigene001242	499	gi|48475029	yij1_schpo ame: full=uncharacterized protein	1e-05	44	41.9726	154
all-unigene001243	240	gi|482560619	homolog of anti-oxidant 1	1.84353e-16	97	71.633	37
all-unigene001245	290	gi|44889032	nu6m_arath ame: full=nadh-ubiquinone oxidoreductase chain 6 ame: full=nadh dehydrogenase subunit 6	1.49696e-21	79	101.293	72
all-unigene001246	230	gi|1729894	tegu_hhv7j ame: full=deneddylase u31	1e-05	61	34.6538	36
all-unigene001247	423	gi|38258172	pol5_drome ame: full=retrovirus-related pol polyprotein from transposon opus includes: ame: full=protease includes: ame: full=reverse transcriptase includes: ame: full=endonuclease	6.60324e-12	47	69.3218	151
all-unigene001251	347	gi|75072500	hs90a_bovin ame: full=heat shock protein hsp 90-alpha	4.79608e-60	100	229.18	115
all-unigene001252	381	gi|6174903	pgca_bovin ame: full=aggrecan core protein ame: full=cartilage-specific proteoglycan core protein short=cspcp flags: precursor	1e-05	49	40.0466	73
all-unigene001253	1281	gi|44888115	m310_arath ame: full=uncharacterized mitochondrial protein g00310 ame: full=orf154	3.45639e-15	68	74.3294	73
all-unigene001255	359	gi|117940144	erd6_arath ame: full=sugar transporter erd6 ame: full=early-responsive to dehydration protein 6 ame: full=sugar transporter-like protein 1	2.22275e-17	87	87.4261	57
all-unigene001256	510	gi|121949074	lonf3_human ame: full=lon peptidase n-terminal domain and ring finger protein 3 ame: full=ring finger protein 127	3.38574e-08	56	57.7658	98
all-unigene001257	296	gi|81790503	rl17_chlte ame: full=50s ribosomal protein l17	1e-05	54	33.4982	42
all-unigene001258	581	gi|548540	po11_scico ame: full=retrovirus-related pol polyprotein from type-1 retrotransposable element r1 ame: full=retrovirus-related pol polyprotein from type i retrotransposable element r1 includes: ame: full=reverse transcriptase includes: ame: full=endonuclease	1e-05	46	34.6538	63
all-unigene001261	285	gi|482551728	cw-type zinc isoform 1	6.62125e-35	78	136.346	95
all-unigene001266	451	gi|20141593	dgk1_arath ame: full=diacylglycerol kinase 1 short=dag kinase 1 ame: full=diglyceride kinase 1 short=dgk 1	2.17445e-33	57	140.969	146
all-unigene001267	481	gi|1169340	xero1_arath ame: full=dehydrin xero 1	1.19755e-06	35	52.373	126
all-unigene001268	334	gi|3915847	rs23_arath ame: full=40s ribosomal protein s2-3	6.58681e-49	90	192.2	109
all-unigene001271	428	gi|75023182	med1_caeel ame: full=mediator of rna polymerase ii transcription subunit ame: full=mediator complex subunit ame: full=suppressor of pal-1 protein 3	1e-05	56	33.4982	41
all-unigene001275	220	gi|482567275	ankyrin repeat-containing protein	1.15421e-17	82	82.0333	57
all-unigene001277	293	gi|146291076	yi31b_yeast ame: full=transposon ty3-i gag-pol polyprotein ame: full=gag3-pol3 ame: full=transposon ty3-2 tya-tyb polyprotein contains: ame: full=capsid protein short=ca ame: full=p24 contains: ame: full=spacer peptide p3 contains: ame: full=nucleocapsid protein p11 short=nc contains: ame: full=ty3 protease short=pr ame: full=p16 contains: ame: full=spacer peptide j contains: ame: full=reverse tr…	7.66312e-18	61	88.9669	94
all-unigene001296	326	gi|313471776	y1670_arath ame: full=probable receptor-like protein kinase at1g67000 flags: precursor	1e-05	54	48.1358	46
all-unigene001280	227	gi|75206070	mate5_arath ame: full=mate efflux family protein 5 ame: full=protein detoxification 1-like 1 ame: full=protein dtx3	3.20887e-08	60	56.9954	75
all-unigene001279	530	gi|81376848	drra_legph ame: full=multifunctional virulence effector protein ame: full=defects in rab1 recruitment protein a includes: ame: full=adenosine monophosphate-protein transferase short=ampylator ame: full=guanosine monophosphate-protein transferase short=gmpylator includes: ame: full=rab1 guanine nucleotide exchange factor	1e-05	44	35.8094	125
all-unigene001282	371	gi|46395647	drl1_arath ame: full=probable disease resistance protein at1g12280	4.71843e-23	66	106.301	93
all-unigene001285	424	gi|46395691	cap9_arath ame: full= clathrin assembly protein at1g14910	1e-05	39	32.7278	113
all-unigene001286	334	gi|125987635	rnhx1_arath ame: full= ribonuclease h protein at1g65750	1.28871e-41	86	167.933	108
all-unigene001291	302	gi|332321757	tias_metlz ame: full=trna 2-agmatinylcytidine synthetase short=trna -agm2c synthetase ame: full=trna agmatidine synthetase	1e-05	44	32.3426	52
all-unigene001292	254	gi|297812599	at5g24280	8.88545e-24	81	104.375	72
all-unigene001294	266	gi|125987635	rnhx1_arath ame: full= ribonuclease h protein at1g65750	2.25048e-06	51	40.0466	54
all-unigene001295	202	gi|21263649	gpa11_caeel ame: full=guanine nucleotide-binding protein alpha-11 subunit	1e-05	63	34.6538	41
all-unigene001300	362	gi|4760708	rna-directed dna polymerase (reverse transcriptase)-related family protein	1.61474e-19	68	89.7373	98
all-unigene001304	660	gi|45477070	m1250_arath ame: full=uncharacterized mitochondrial protein g01250 ame: full=orf102	1.15957e-08	56	60.077	65
all-unigene001301	457	gi|75313532	u74c1_arath ame: full=udp-glycosyltransferase 74c1	2.376e-35	84	147.517	95
all-unigene001302	634	gi|46577339	tmvrn_nicgu ame: full=tmv resistance protein n	9.58344e-18	51	90.1225	194
all-unigene001306	257	gi|75334459	cxe5_arath ame: full=probable carboxylesterase 5 ame: full= 5	7.38144e-37	92	152.14	85
all-unigene001307	213	gi|15237695	methyltransferase family protein namt1	1e-05	78	49.6766	38
all-unigene001309	205	gi|75324322	cdpkw_arath ame: full=calcium-dependent protein kinase 32	9.47083e-32	100	135.191	68
all-unigene001311	272	gi|126302590	rbl_horvu ame: full=ribulose bisphosphate carboxylase large chain short= isco large subunit flags: precursor	2.2596e-49	100	193.741	90
all-unigene001312	398	gi|75207269	dhqsd_arath ame: full=bifunctional 3-dehydroquinate dehydratase shikimate chloroplastic short=dhq-sdh protein ame: full=dhqase-sorase ame: full=protein embryo defective 3004 includes: ame: full=dehydroquinate dehydratase short=dhq includes: ame: full=shikimate dehydrogenase short=sdh flags: precursor	3.06906e-14	63	77.0258	92
all-unigene001313	465	gi|109892805	nthl1_bovin ame: full=endonuclease iii-like protein 1	3.59493e-10	73	63.929	41
all-unigene001315	254	gi|74997324	ltn1_dicdi ame: full=e3 ubiquitin-protein ligase listerin ame: full=ring finger protein 160	1e-05	55	33.8834	49
all-unigene001316	458	gi|310947294	pdi15_arath ame: full=protein disulfide isomerase-like 1-5 short= 1-5 ame: full=protein disulfide isomerase 3 short= 3 ame: full=protein disulfide isomerase-like 3-1 short= 3-1 flags: precursor	9.89803e-09	69	52.7582	43
all-unigene001319	250	gi|731871	tao3_yeast ame: full=cell morphogenesis protein pag1 ame: full=protein tao3	1e-05	48	32.3426	62
all-unigene001321	727	gi|76803833	wrk52_arath ame: full=probable wrky transcription factor 52 ame: full=disease resistance protein rrs1 ame: full=disease resistance protein slh1 ame: full=protein sensitive to low humidity 1 ame: full=resistance to ralstonia solanacearum 1 protein ame: full=wrky dna-binding protein 52	1.61348e-49	64	196.052	218
all-unigene001327	243	gi|312282595	myb-related protein 1	2.7951e-11	78	66.6254	47
all-unigene001330	411	gi|482568430	serine-rich protein	4.57164e-36	82	130.183	91
all-unigene001331	554	gi|67461440	spl9_arath ame: full=squamosa promoter-binding-like protein 9	8.89317e-24	56	109.768	111
all-unigene001332	228	gi|2194122	sterile alpha motif domain-containing protein	4.23753e-13	76	72.0182	63
all-unigene001333	238	gi|75207269	dhqsd_arath ame: full=bifunctional 3-dehydroquinate dehydratase shikimate chloroplastic short=dhq-sdh protein ame: full=dhqase-sorase ame: full=protein embryo defective 3004 includes: ame: full=dehydroquinate dehydratase short=dhq includes: ame: full=shikimate dehydrogenase short=sdh flags: precursor	3.49374e-34	97	143.28	79
all-unigene001334	229	gi|42572603	esterase lipase thioesterase family protein	5.46326e-25	77	103.605	79
all-unigene001335	360	gi|51316538	rha1a_arath ame: full=ring-h2 zinc finger protein rha1a	1.59293e-15	70	81.2629	65
all-unigene001338	323	gi|74859103	int3_dicdi ame: full=integrator complex subunit 3 homolog ame: full=soss complex subunit a homolog	1.88863e-24	72	110.923	105
all-unigene001339	370	gi|238054330	tcsb_emeni ame: full=two-component system protein b ame: full=protein nhk1 ame: full=sln1 homolog flags: precursor	1e-05	55	33.4982	56
all-unigene001340	436	gi|130582	polx_tobac ame: full=retrovirus-related pol polyprotein from transposon tnt 1-94 includes: ame: full=protease includes: ame: full=reverse transcriptase includes: ame: full=endonuclease	1e-05	43	41.5874	142
all-unigene001341	472	gi|75262680	p2b12_arath ame: full= f-box protein pp2-b12 ame: full=protein phloem protein 2-like b12 short= 2-b12	4.13419e-17	88	87.0409	50
all-unigene001342	715	gi|143454043	rh28_orysj ame: full=dead-box atp-dependent rna helicase 28	1e-05	52	34.6538	102
all-unigene001344	525	gi|126215682	cc104_human ame: full=coiled-coil domain-containing protein 104	1e-05	41	33.113	127
all-unigene001345	533	gi|75268203	fb52_arath ame: full= f-box protein at1g50870	2.83251e-08	62	58.151	62
all-unigene001348	203	gi|730640	rs19_human ame: full=40s ribosomal protein s19	1.62033e-31	100	134.42	67
all-unigene001349	406	gi|308197099	lor16_arath ame: full=protein lurp-one-related 16	1.26358e-44	90	177.948	102
all-unigene001350	305	gi|263505419	rch1_arath ame: full=lrr receptor-like serine threonine-protein kinase rch1 ame: full=protein root clavata-homolog1 1 flags: precursor	3.43423e-09	58	56.6102	90
all-unigene001351	409	gi|75248527	sumo5_arath ame: full=small ubiquitin-related modifier 5 short= 5	8.50339e-17	69	85.5001	89
all-unigene001352	366	gi|115502269	ab19i_arath ame: full=abc transporter i family member 19 short=abc transporter short= 19 ame: full=gcn-related protein 2 ame: full=non-intrinsic abc protein 4	5.38655e-51	92	199.134	109
all-unigene001355	405	gi|75338812	drp4c_arath ame: full=dynamin-related protein 4c	1.53962e-38	74	136.346	112
all-unigene001358	2202	gi|75317773	y4200_arath ame: full=uncharacterized protein at4g02000	1e-05	45	45.8246	140
all-unigene001360	781	gi|75206097	gdl32_arath ame: full=gdsl esterase lipase at2g03980 ame: full=extracellular lipase at2g03980 flags: precursor	5.78911e-112	85	403.675	260
all-unigene001362	475	gi|75154575	cle17_arath ame: full=clavata3 esr -related protein 17 contains: ame: full=cle17p flags: precursor	6.19903e-24	69	109.768	100
all-unigene001363	259	gi|74826449	rpob_neoca ame: full=dna-directed rna polymerase subunit beta ame: full=pep ame: full=plastid-encoded rna polymerase subunit beta short=rna polymerase subunit beta	1e-05	53	33.113	45
all-unigene001364	203	gi|75339093	y1461_arath ame: full=probable serine threonine-protein kinase at1g54610	2.68947e-10	69	63.929	62
all-unigene001366	212	gi|54040497	ymdb_salti ame: full=o-acetyl-adp-ribose deacetylase ame: full=regulator of rnase iii activity	9.47965e-08	77	55.4546	45
all-unigene001367	212	gi|6967112	nuclease harbi1-like	6.4022e-30	84	117.472	70
all-unigene001368	276	gi|22330342	swim zinc finger-like protein	4.22446e-20	97	93.2041	47
all-unigene001370	486	gi|13878378	c71bw_arath ame: full=cytochrome p450 71b35	2.04216e-09	91	61.6178	36
all-unigene001373	315	gi|62900892	serb_arath ame: full=phosphoserine chloroplastic short=psp short=pspase ame: full=o-phosphoserine phosphohydrolase flags: precursor	5.00868e-33	86	139.428	90
all-unigene001372	397	gi|482551246	elongation factor ts family protein	5.29141e-18	82	89.3521	62
all-unigene001374	293	gi|75174184	epfl1_arath ame: full=epidermal patterning factor-like protein 1 short=epf-like protein 1 flags: precursor	2.53333e-37	87	153.68	83
all-unigene001377	473	gi|297812869	hypothetical protein ARALYDRAFT_910732	7.21878e-09	71	59.6918	52
all-unigene001379	445	gi|68565176	atl28_arath ame: full=ring-h2 finger protein atl28	5.82229e-44	78	176.022	122
all-unigene001382	286	gi|75216655	ein4_arath ame: full=protein ein4 short= 4 ame: full=protein ethylene insensitive 4	1.07131e-35	98	148.288	77
all-unigene001385	593	gi|120523	fril_human ame: full=ferritin light chain short=ferritin l subunit	8.57571e-79	92	292.738	157
all-unigene001387	408	gi|334302883	pp148_arath ame: full=pentatricopeptide repeat-containing protein at2g04860	1.03226e-38	82	158.303	115
all-unigene001388	247	gi|81881346	grtp1_mouse ame: full=growth hormone-regulated tbc protein 1 ame: full=tbc1 domain family member 6	1e-05	64	39.2762	39
all-unigene001389	418	gi|127809	sl9a1_human ame: full=sodium hydrogen exchanger 1 ame: full=apnh ame: full=na(+) h(+) amiloride-sensitive ame: full=na(+) h(+) exchanger 1 short=nhe-1 ame: full=solute carrier family 9 member 1	1e-05	43	34.6538	110
all-unigene001394	661	gi|6166119	diap2_human ame: full=protein diaphanous homolog 2 ame: full=diaphanous-related formin-2 short=drf2	1e-05	55	41.9726	83
all-unigene001395	1233	gi|296439606	aly1_arath ame: full=protein always early 1 short= 1	1.37047e-141	79	503.056	386
all-unigene001397	362	gi|259016324	per48_arath ame: full= peroxidase 48 short=atperox p48 flags: precursor	2.27624e-38	83	157.147	119
all-unigene001399	258	gi|172044677	cslab_arath ame: full=probable mannan synthase 11 ame: full=cellulose synthase-like protein a11 short= sla11	2.54876e-21	85	100.523	62
all-unigene001400	243	gi|380876925	fkb43_arath ame: full=peptidyl-prolyl cis-trans isomerase fkbp43 short=ppiase fkbp43 ame: full=fk506-binding protein 43 short= 43 ame: full=immunophilin fkbp43 ame: full=rotamase	2.42129e-11	78	67.3958	52
all-unigene001401	762	gi|730753	smc2_yeast ame: full=structural maintenance of chromosomes protein 2 ame: full=da-box protein smc2	1e-05	46	36.965	123
all-unigene001403	207	gi|122248693	nltp3_orysj ame: full=non-specific lipid-transfer protein 3 short=ltp 3 flags: precursor	1.05199e-14	88	78.5666	50
all-unigene001410	390	gi|75337370	prs4b_arath ame: full=26s proteasome regulatory subunit 4 homolog b ame: full=26s proteasome aaa-atpase subunit rpt2b ame: full=26s proteasome subunit 4 homolog b ame: full=regulatory particle triple-a atpase subunit 2b	7.12507e-24	76	108.997	85
all-unigene001411	326	gi|1171822	nu5m_caeel ame: full=nadh-ubiquinone oxidoreductase chain 5 ame: full=nadh dehydrogenase subunit 5	1e-05	42	33.113	78
all-unigene001412	364	gi|134973	stmn1_human ame: full=stathmin ame: full=leukemia-associated phosphoprotein p18 ame: full=metablastin ame: full=oncoprotein 18 short=op18 ame: full=phosphoprotein p19 short=pp19 ame: full=prosolin ame: full=protein pr22 ame: full=pp17	2.58932e-45	100	180.259	91
all-unigene001414	216	gi|426018924	apy7_arath ame: full=probable apyrase 7 short= 7 ame: full=atp-diphosphatase ame: full=atp-diphosphohydrolase ame: full=adenosine diphosphatase short=adpase ame: full=ntpdase ame: full=nucleoside triphosphate diphosphohydrolase 7	7.92119e-31	88	132.109	76
all-unigene001415	206	gi|334302851	rlp12_arath ame: full=receptor-like protein 12 short= 12 flags: precursor	1e-05	55	35.039	36
all-unigene001417	883	gi|75273356	pr1f3_arath ame: full=pra1 family protein f3 short=	1.17873e-42	67	173.711	195
all-unigene001420	419	gi|81600480	lepa_thet8 ame: full=elongation factor 4 short=ef-4 ame: full=ribosomal back-translocase	1e-05	43	32.7278	126
all-unigene001422	309	gi|357529063	y1745_arath ame: full=uncharacterized protein at1g51745	2.04502e-26	96	117.472	64
all-unigene001424	518	gi|75101011	pp181_arath ame: full=pentatricopeptide repeat-containing protein at2g33680	4.26579e-59	87	226.868	144
all-unigene001426	307	gi|297825247	complete clone: rafl24-09-	4.49067e-44	98	103.605	52
all-unigene001428	433	gi|1709972	rl10a_mouse ame: full=60s ribosomal protein l10a ame: full=csa-19 ame: full=neural precursor cell expressed developmentally down-regulated protein 6 short=nedd-6	4.59395e-43	100	172.94	86
all-unigene001429	271	gi|45477070	m1250_arath ame: full=uncharacterized mitochondrial protein g01250 ame: full=orf102	4.78174e-07	53	53.1434	75
all-unigene001431	239	gi|186502305	kinase interacting (kip1-like) family protein	2.94918e-13	70	73.559	82
all-unigene001433	511	gi|75318691	nrx1_arath ame: full=probable nucleoredoxin 1 short= rx1	1e-05	46	39.2762	80
all-unigene001432	547	gi|75283542	cpna2_arath ame: full=chaperonin 60 subunit alpha chloroplastic short=cpn-60 alpha 2 ame: full=protein embryo defective 3007 flags: precursor	1.91428e-47	98	188.348	101
all-unigene001435	526	gi|74703510	sec23_ustma ame: full=protein transport protein sec23	4.23727e-15	59	43.5134	52
all-unigene001436	602	gi|6136084	tycc_brepa ame: full=tyrocidine synthase 3 ame: full=tyrocidine synthase iii includes: ame: full=atp-dependent asparagine adenylase short= ame: full=asparagine activase includes: ame: full=atp-dependent glutamine adenylase short= ame: full=glutamine activase includes: ame: full=atp-dependent tyrosine adenylase short= ame: full=tyrosine activase includes: ame: full=atp-dependent valine adenylase s…	1e-05	50	33.8834	67
all-unigene001438	347	gi|25090666	lyst_mouse ame: full=lysosomal-trafficking regulator ame: full=beige protein ame: full=chs1 homolog	1e-05	52	32.7278	57
all-unigene001439	259	gi|152013443	crk18_arath ame: full=cysteine-rich receptor-like protein kinase 18 short=cysteine-rich rlk18 flags: precursor	1.70422e-17	72	87.8113	70
all-unigene001441	277	gi|502158735	-1 protein	2.13581e-33	74	129.028	87
all-unigene001440	405	gi|75262617	pub52_arath ame: full=u-box domain-containing protein 52 ame: full=plant u-box protein 52 includes: ame: full=e3 ubiquitin ligase includes: ame: full=serine threonine-protein kinase	6.30876e-36	82	149.058	97
all-unigene001442	432	gi|465073	ve06_var67 ame: full=protein e6	1e-05	52	32.3426	61
all-unigene001443	218	gi|12585139	agm1_arath ame: full=phosphoacetylglucosamine mutase short=pagm ame: full=acetylglucosamine phosphomutase ame: full=dna-damage-repair toleration protein drt101 ame: full=n-acetylglucosamine-phosphate mutase	2.09422e-15	91	80.8777	47
all-unigene001444	218	gi|475583498	hypothetical protein F775_10766	1.69025e-11	89	67.0106	37
all-unigene001445	486	gi|45477199	rk16_wheat ame: full=50s ribosomal protein chloroplastic	4.03916e-74	100	276.559	136
all-unigene001449	511	gi|125987635	rnhx1_arath ame: full= ribonuclease h protein at1g65750	2.49929e-19	54	94.7449	156
all-unigene001453	222	gi|297794133	lmbr1 domain-containing protein 2 homolog a-like	2.70916e-22	100	98.9821	45
all-unigene001452	725	gi|229621709	c3h1_arath ame: full=zinc finger ccch domain-containing protein 1 short= 3h1	9.5473e-18	55	90.5077	120
all-unigene001456	204	gi|130582	polx_tobac ame: full=retrovirus-related pol polyprotein from transposon tnt 1-94 includes: ame: full=protease includes: ame: full=reverse transcriptase includes: ame: full=endonuclease	1.63165e-07	64	54.6842	67
all-unigene001458	272	gi|50401153	nac19_arath ame: full=nac domain-containing protein 19 short=anac019 ame: full=abscisic-acid-responsive nac short=anac	2.13463e-15	97	80.8777	38
all-unigene001459	457	gi|297818318	zinc finger family protein	2.49068e-08	86	61.2326	82
all-unigene001461	321	gi|108935889	rs2_bovin ame: full=40s ribosomal protein s2	2.06884e-55	100	213.772	107
all-unigene001462	226	gi|21537272	ring u-box domain-containing protein	5.13919e-32	92	123.635	68
all-unigene001465	329	gi|15223729	alpha-crystallin domain of heat shock protein-containing protein	1.26943e-19	92	89.3521	53
all-unigene001468	283	gi|74815317	y7014_plaf7 ame: full=leucine-rich repeat and coiled-coil domain-containing protein pf07_0014	1e-05	53	32.3426	60
all-unigene001469	348	gi|74582219	slpi_schpo ame: full=uncharacterized protein slp1 ame: full=sun-like protein 1 flags: precursor	8.03486e-07	47	52.373	118
all-unigene001472	229	gi|12323627	non-ltr retroelement reverse transcriptase	2.93277e-08	54	58.9214	75
all-unigene001474	452	gi|44888115	m310_arath ame: full=uncharacterized mitochondrial protein g00310 ame: full=orf154	2.03995e-23	63	107.842	115
all-unigene001477	740	gi|5262213	myosin heavy chain-like protein	1.98706e-19	49	96.6709	218
all-unigene001479	230	gi|75318568	crk23_arath ame: full= cysteine-rich receptor-like protein kinase 23 short=cysteine-rich rlk23 flags: precursor	5.82999e-10	52	62.7734	76
all-unigene001480	391	gi|482550928	kinesin light	2.66915e-15	57	80.8777	133
all-unigene001481	1049	gi|130582	polx_tobac ame: full=retrovirus-related pol polyprotein from transposon tnt 1-94 includes: ame: full=protease includes: ame: full=reverse transcriptase includes: ame: full=endonuclease	7.09965e-16	39	85.1149	356
all-unigene001486	362	gi|75180618	cle21_arath ame: full=clavata3 esr -related protein 21 contains: ame: full=cle21p flags: precursor	5.272e-19	62	92.8189	108
all-unigene001490	283	gi|13876509	polyprotein	1.00769e-24	73	107.457	93
all-unigene001491	446	gi|8777435	nucleosome assembly protein	1e-05	56	48.521	69
all-unigene001492	904	gi|93138709	postn_human ame: full=periostin short=pn ame: full=osteoblast-specific factor 2 short=osf-2 flags: precursor	8.79997e-33	100	140.969	71
all-unigene001493	994	gi|93138709	postn_human ame: full=periostin short=pn ame: full=osteoblast-specific factor 2 short=osf-2 flags: precursor	4.65581e-70	64	265.003	239
all-unigene001494	219	gi|1169524	emrb_haein ame: full=multidrug resistance protein b homolog	1e-05	58	32.3426	46
all-unigene001495	370	gi|338819811	y5738_arath ame: full=btb poz domain-containing protein at5g67385	1.51084e-37	79	154.451	124
all-unigene001496	364	gi|15223568	uncharacterized protein	1.59732e-19	89	86.2705	49
all-unigene001498	325	gi|482555195	uncharacterized loc101218481	8.26393e-38	87	142.51	91
all-unigene001500	242	gi|75325494	cdkf4_orysj ame: full=cyclin-dependent kinase f-4 short=cdkf 4 ame: full=serine threonine-protein kinase mhk-like protein 2	4.02468e-21	81	82.4185	59
all-unigene001501	259	gi|297839947	rna recognition motif -containing protein	2.99754e-14	62	75.485	100
all-unigene001502	350	gi|75116713	gdl62_arath ame: full=gdsl esterase lipase at4g10955	1e-05	48	44.2838	84
all-unigene001504	418	gi|166204139	myoj_dicdi ame: full=myosin-j heavy chain ame: full=myosin-5b	9.26174e-27	71	118.627	101
all-unigene001505	201	gi|75337836	nfxl1_arath ame: full=nf-x1-type zinc finger protein nfxl1 short= 1	1e-05	64	38.5058	48
all-unigene001509	308	gi|75179661	ppr94_arath ame: full=pentatricopeptide repeat-containing protein at1g62910	2.66735e-42	90	170.244	101
all-unigene001508	350	gi|51316126	arr3_arath ame: full=two-component response regulator arr3	1e-05	77	40.817	36
all-unigene001511	220	gi|75099392	subl_arath ame: full=subtilisin-like protease ame: full=cucumisin-like serine protease flags: precursor	7.91544e-23	79	105.531	73
all-unigene001512	355	gi|116241246	ank1_human ame: full=ankyrin-1 short=ank-1 ame: full=ankyrin-r ame: full=erythrocyte ankyrin	2.32166e-06	56	50.8322	79
all-unigene001515	292	gi|20138932	pldz1_arath ame: full=phospholipase d zeta short= zeta short=pld zeta	5.65678e-29	71	125.946	91
all-unigene001518	288	gi|29839687	wrk19_arath ame: full=probable wrky transcription factor 19 ame: full=wrky dna-binding protein 19	6.10585e-07	57	52.7582	76
all-unigene001517	251	gi|4388829	retroelement pol polyprotein	2.40358e-14	78	77.0258	47
all-unigene001519	345	gi|13124684	copia_drome ame: full=copia protein ame: full=gag-int-pol protein contains: ame: full=copia vlp protein contains: ame: full=copia protease	2.10954e-15	61	80.8777	105
all-unigene001520	601	gi|75339263	fb262_arath ame: full=f-box protein at5g25290	1.43342e-36	65	152.525	175
all-unigene001521	365	gi|482552577	protein	5.61066e-38	70	142.124	129
all-unigene001523	214	gi|300681233	msrb3_arath ame: full=peptide methionine sulfoxide reductase b3 short= 3 ame: full=peptide-methionine -s-oxide reductase flags: precursor	8.82537e-14	91	75.485	37
all-unigene001524	249	gi|122228104	acco1_orysj ame: full=1-aminocyclopropane-1-carboxylate oxidase 1 short=acc oxidase 1 ame: full=ethylene-forming enzyme short=efe	6.13315e-07	60	52.7582	64
all-unigene001528	275	gi|9743345	s65812rna-directed dna polymerase (ec ) (clone dw15) - arabidopsis thaliana retrotransposon ta11-1	2.43864e-14	62	77.411	86
all-unigene001527	825	gi|190411627	ured_sorc5 ame: full=urease accessory protein	9.71008e-12	58	70.8626	106
all-unigene001529	224	gi|30692271	protein	8.6574e-17	95	77.7962	41
all-unigene001532	331	gi|75200292	y1301_arath ame: full=btb poz domain-containing protein at1g03010	6.01411e-23	71	105.916	84
all-unigene001531	274	gi|465861	ylu2_pican ame: full=uncharacterized protein in leu2 3 region	1e-05	60	32.3426	64
all-unigene001533	279	gi|126296	lin1_nycco ame: full=line-1 reverse transcriptase homolog	1.16113e-21	65	101.679	90
all-unigene001535	811	gi|134034966	yg31b_yeast ame: full=transposon ty3-g gag-pol polyprotein ame: full=gag3-pol3 ame: full=transposon ty3-1 tya-tyb polyprotein contains: ame: full=capsid protein short=ca ame: full=p24 contains: ame: full=spacer peptide p3 contains: ame: full=nucleocapsid protein p11 short=nc contains: ame: full=ty3 protease short=pr ame: full=p16 contains: ame: full=spacer peptide j contains: ame: full=reverse tr…	7.15595e-12	47	71.2478	165
all-unigene001534	418	gi|1170600	k501_actdefruit protein pkiwi501	1e-05	45	35.039	81
all-unigene001537	263	gi|123276486	dnaj_sacd2 ame: full=chaperone protein	1e-05	48	34.2686	50
all-unigene001538	215	gi|75336898	rb45b_arath ame: full=polyadenylate-binding protein rbp45b short=poly -binding protein rbp45b ame: full=rna-binding protein 45b short= 45b	4.5116e-26	84	116.316	71
all-unigene001542	227	gi|78099098	porcn_mouse ame: full=protein-cysteine n-palmitoyltransferase porcupine short=mporc	1e-05	55	33.4982	58
all-unigene001546	263	gi|130398	pol2_drome ame: full=retrovirus-related pol polyprotein from transposon 297 includes: ame: full=protease includes: ame: full=reverse transcriptase includes: ame: full=endonuclease	1e-05	53	38.891	75
all-unigene001548	330	gi|12323627	rnase h domain-containing protein	2.70464e-30	68	124.02	108
all-unigene001550	214	gi|341941109	ep15r_mouse ame: full=epidermal growth factor receptor substrate 15-like 1 ame: full=epidermal growth factor receptor pathway substrate 15-related sequence short=eps15-rs ame: full=eps15-related protein short=eps15r	1e-05	60	34.2686	43
all-unigene001552	251	gi|322510008	ab24g_arath ame: full=abc transporter g family member 24 short=abc transporter short= 24 ame: full=probable white-brown complex homolog protein 25 short= 25	1.50366e-21	94	101.293	55
all-unigene001557	308	gi|254790755	recr_brebn ame: full=recombination protein	1e-05	60	33.113	35
all-unigene001558	369	gi|75337298	c3h18_arath ame: full=zinc finger ccch domain-containing protein 18 short= 3h18	3.63396e-15	93	80.1073	43
all-unigene001560	290	gi|193806497	ppr92_arath ame: full=pentatricopeptide repeat-containing protein mitochondrial flags: precursor	1.10247e-40	92	164.851	96
all-unigene001561	209	gi|539953	jc2022enhancer factor i chain a-d - rat	9.19483e-09	69	56.9954	55
all-unigene001563	379	gi|125987635	rnhx1_arath ame: full= ribonuclease h protein at1g65750	1e-05	57	41.2022	56
all-unigene001564	208	gi|156631014	aldoa_pantr ame: full=fructose-bisphosphate aldolase a ame: full=muscle-type aldolase	5.91433e-34	100	142.51	69
all-unigene001565	257	gi|297810561	ankyrin repeat family protein	6.64671e-28	75	114.775	88
all-unigene001566	446	gi|482567733	hypothetical protein CARUB_v10015161mg	2.22394e-29	87	101.679	65
all-unigene001568	489	gi|75262477	gstt3_arath ame: full=glutathione s-transferase t3 short= 3 ame: full=gst class-theta member 3 ame: full=glutathione s-transferase 10c	7.95638e-38	65	155.992	150
all-unigene001573	269	gi|30173108	ldox_arath ame: full=leucoanthocyanidin dioxygenase short=ldox short=leucocyanidin oxygenase ame: full=anthocyanidin synthase short=ans ame: full=leucoanthocyanidin hydroxylase ame: full=protein tannin deficient seed 4 short=tds4 ame: full=protein transparent testa 11 short=tt11 ame: full=protein transparent testa 17 short=tt17 ame: full=protein transparent testa 18 short=tt18	8.67405e-25	80	112.079	71
all-unigene001574	473	gi|141475	ytx2_xenla ame: full=transposon tx1 uncharacterized 149 kda protein ame: full=orf 2	3.57952e-08	49	57.3806	129
all-unigene001576	498	gi|300669710	finc_human ame: full=fibronectin short=fn ame: full=cold-insoluble globulin short=cig contains: ame: full=anastellin contains: ame: full=ugl-y1 contains: ame: full=ugl-y2 contains: ame: full=ugl-y3 flags: precursor	1.735e-67	80	254.603	161
all-unigene001578	316	gi|29839622	wrk49_arath ame: full=probable wrky transcription factor 49 ame: full=wrky dna-binding protein 49	7.01437e-11	78	65.855	47
all-unigene001579	847	gi|75169402	lacs3_arath ame: full=long chain acyl- synthetase 3	8.63491e-104	97	376.711	190
all-unigene001580	324	gi|482571314	at1g75770 f10a5_10	6.30976e-21	65	93.5893	112
all-unigene001581	215	gi|75220394	prot1_arath ame: full=proline transporter 1 short= 1	1.10867e-32	95	138.272	71
all-unigene001583	374	gi|131279	psbc_galsu ame: full=photosystem ii cp43 chlorophyll apoprotein ame: full=psii 43 kda protein ame: full=photosystem ii 44 kda reaction center protein ame: full=protein cp-43 ame: full=protein p6 flags: precursor	1e-05	49	37.7354	59
all-unigene001584	237	gi|251764762	lst2_danre ame: full=lateral signaling target protein 2 homolog ame: full=zinc finger fyve domain-containing protein 28	1e-05	44	33.8834	56
all-unigene001585	913	gi|75097884	snc1_arath ame: full=protein suppressor of npr1- constitutive 1 short= 1 ame: full=disease resistance rpp5-like protein	3.00797e-89	76	328.561	271
all-unigene001587	360	gi|357529538	drl29_arath ame: full=probable disease resistance protein at4g33300	7.14186e-08	77	55.8398	45
all-unigene001588	274	gi|482574748	helicase-like protein	2.20127e-11	74	67.781	90
all-unigene001589	423	gi|75169836	pp122_arath ame: full=pentatricopeptide repeat-containing protein at1g74630	9.48254e-48	82	188.348	127
all-unigene001592	460	gi|2506984	cald1_chick ame: full=caldesmon short=cdm	7.04232e-06	44	49.6766	149
all-unigene001593	801	gi|75309083	alc_arath ame: full=transcription factor alc ame: full=basic helix-loop-helix protein 73 short= 73 short=bhlh 73 ame: full=protein alcatraz ame: full=transcription factor en 98 ame: full=bhlh transcription factor bhlh073	3.09887e-68	73	258.455	216
all-unigene001594	210	gi|75265912	ppa10_arath ame: full=purple acid phosphatase 10 flags: precursor	6.14883e-15	91	79.337	37
all-unigene001596	407	gi|75100697	y4117_arath ame: full= disease resistance protein at4g11170	7.73732e-10	58	62.3882	140
all-unigene001598	333	gi|122169494	rl102_orysj ame: full=60s ribosomal protein l10-2 ame: full=protein qm1 ame: full= tumor suppressor sg12	9.51302e-53	96	204.912	110
all-unigene001601	466	gi|74849923	ctds_dicdi ame: full=probable c-terminal domain small phosphatase ame: full=developmental gene 1148 protein	1e-05	74	38.5058	35
all-unigene001602	201	gi|297788000	mitochondrial transcription termination factor family protein	4.50016e-15	67	75.8702	71
all-unigene001624	393	gi|482552463	atpase-related dna repair protein	1.53499e-15	87	80.8777	80
all-unigene001605	748	gi|75116771	ppr24_arath ame: full=pentatricopeptide repeat-containing protein mitochondrial flags: precursor	1.14127e-16	64	71.2478	81
all-unigene001609	420	gi|75273922	pp250_arath ame: full=pentatricopeptide repeat-containing protein at3g23020	3.47888e-66	96	249.595	139
all-unigene001611	254	gi|75274448	fao3_arath ame: full=long-chain-alcohol oxidase fao3 ame: full=long-chain fatty alcohol oxidase 3	5.30659e-35	92	145.976	84
all-unigene001612	381	gi|62511207	znhi3_pantr ame: full=zinc finger hit domain-containing protein 3 ame: full=thyroid hormone receptor interactor 3 ame: full=thyroid receptor-interacting protein 3 short=tr-interacting protein 3 short=trip-3	5.1855e-06	55	49.6766	52
all-unigene001614	554	gi|116241246	ank1_human ame: full=ankyrin-1 short=ank-1 ame: full=ankyrin-r ame: full=erythrocyte ankyrin	3.75374e-06	43	51.2174	175
all-unigene001616	250	gi|44888108	m120_arath ame: full=uncharacterized mitochondrial protein g00120 ame: full=orf143	1e-05	53	41.5874	69
all-unigene001617	439	gi|25090171	dot1l_human ame: full=histone-lysine n- h3 lysine-79 specific ame: full=dot1-like protein ame: full=histone h3-k79 methyltransferase short=h3-k79-hmtase ame: full=lysine n-methyltransferase 4	1e-05	39	33.8834	124
all-unigene001618	238	gi|75181128	pp378_arath ame: full=pentatricopeptide repeat-containing protein chloroplastic flags: precursor	3.51814e-10	68	63.5438	60
all-unigene001622	354	gi|223635621	pp325_arath ame: full=pentatricopeptide repeat-containing protein chloroplastic flags: precursor	1.07002e-46	97	169.859	87
all-unigene001625	1317	gi|130582	polx_tobac ame: full=retrovirus-related pol polyprotein from transposon tnt 1-94 includes: ame: full=protease includes: ame: full=reverse transcriptase includes: ame: full=endonuclease	1e-05	54	48.1358	74
all-unigene001629	399	gi|347595775	tmtc1_human ame: full=transmembrane and tpr repeat-containing protein 1	1e-05	47	35.8094	74
all-unigene001632	255	gi|75100656	pp175_arath ame: full=pentatricopeptide repeat-containing protein chloroplastic flags: precursor	4.98991e-17	83	86.2705	48
all-unigene001631	293	gi|75111159	mee12_arath ame: full=tata box-binding protein-associated factor rna polymerase i subunit b ame: full=central cell guidance protein ame: full=protein maternal effect embryo arrest 12 ame: full=tata box-binding protein-associated factor 1b short=tbp-associated factor 1b	5.32527e-07	51	44.669	70
all-unigene001634	311	gi|251764688	facr6_arath ame: full=fatty acyl- reductase chloroplastic flags: precursor	6.17168e-15	86	79.337	51
all-unigene001635	253	gi|297831676	predicted protein	1.97134e-08	62	56.6102	74
all-unigene001637	306	gi|75311616	hsfc1_arath ame: full=heat stress transcription factor c-1 short= sfc1 ame: full= sf-08	1e-05	55	45.8246	61
all-unigene001636	351	gi|308153552	srrm5_human ame: full=serine arginine repetitive matrix protein 5	1e-05	48	33.4982	47
all-unigene001638	300	gi|3183544	pabp1_human ame: full=polyadenylate-binding protein 1 short=pabp-1 short=poly -binding protein 1	1.79529e-51	100	200.675	99
all-unigene001639	286	gi|75076102	rl10a_macfa ame: full=60s ribosomal protein l10a	7.1527e-48	100	188.734	93
all-unigene001640	1528	gi|29336631	piga_mouse ame: full=n-acetylglucosaminyl-phosphatidylinositol biosynthetic protein ame: full= c-pi synthesis protein ame: full=phosphatidylinositol-glycan biosynthesis class a protein short=pig-a	5.26986e-124	75	275.404	222
all-unigene001641	1449	gi|74644194	gpi3_schpo ame: full=phosphatidylinositol n-acetylglucosaminyltransferase gpi3 subunit ame: full= c-pi synthesis protein	9.60016e-129	70	460.685	420
all-unigene001642	235	gi|75100697	y4117_arath ame: full= disease resistance protein at4g11170	1.29589e-12	58	71.633	78
all-unigene001644	235	gi|374095430	npl4_mago7 ame: full=nuclear protein localization protein 4	1e-05	54	33.4982	55
all-unigene001646	349	gi|264664537	y5487_arath ame: full=probable lrr receptor-like serine threonine-protein kinase at5g48740 flags: precursor	7.2336e-24	82	108.997	69
all-unigene001647	331	gi|20138785	ics1_arath ame: full=isochorismate synthase chloroplastic short= cs1 short= ame: full=enhanced disease susceptibility 16 short=eds16 ame: full=isochorismate mutase 1 ame: full=salicylic acid induction deficient 2 short=sid2 ame: full=menf-like protein 1 flags: precursor	4.93128e-17	89	86.2705	48
all-unigene001649	239	gi|75147159	pp345_arath ame: full=pentatricopeptide repeat-containing protein mitochondrial flags: precursor	1.91708e-32	92	137.502	79
all-unigene001650	242	gi|47606316	sycp1_arath ame: full=synaptonemal complex protein 1 ame: full=synaptonemal complex central region protein zyp1a	4.88261e-20	77	96.2857	80
all-unigene001654	425	gi|75266316	u76e5_arath ame: full=udp-glycosyltransferase 76e5	8.01594e-34	79	142.124	96
all-unigene001656	505	gi|75309250	dpb_arath ame: full=transcription factor-like protein dpb ame: full=dp-like protein b short= bb ame: full=e2f dimerization partner protein b	3.73147e-20	90	97.4413	55
all-unigene001655	245	gi|62900379	gh317_arath ame: full=indole-3-acetic acid-amido synthetase ame: full=auxin-responsive gh3-like protein 17 short= 3-17	1.37489e-06	62	51.6026	59
all-unigene001657	294	gi|482574994	ccr4-not transcription complex subunit 1-like	4.16277e-11	76	68.1662	50
all-unigene001658	1096	gi|75279075	u71c2_arath ame: full=udp-glycosyltransferase 71c2	1.45095e-83	80	310.071	233
all-unigene001659	336	gi|74996494	mrka_dicdi ame: full=probable serine threonine-protein kinase mark-a	1e-05	52	35.8094	68
all-unigene001660	764	gi|82232105	mul1a_danre ame: full=mitochondrial ubiquitin ligase activator of nfkb 1-a ame: full=e3 ubiquitin-protein ligase mul1-a	1e-05	51	46.595	100
all-unigene001661	293	gi|145327713	lyr family of fe s cluster biogenesis protein	7.08081e-09	75	57.3806	44
all-unigene001664	515	gi|31340450	tcpd_aedtr ame: full=t-complex protein 1 subunit delta short=tcp-1-delta ame: full=cct-delta	2.04156e-13	53	75.0998	137
all-unigene001665	225	gi|327478582	gilt_human ame: full=gamma-interferon-inducible lysosomal thiol reductase ame: full=gamma-interferon-inducible protein ip-30 ame: full=legumaturain flags: precursor	1e-05	60	45.8246	45
all-unigene001667	256	gi|9945082	non-ltr retroelement reverse transcriptase	2.83665e-16	70	82.4185	71
all-unigene001668	406	gi|3122858	sera_arath ame: full=d-3-phosphoglycerate chloroplastic short=3-pgdh flags: precursor	2.91979e-33	87	140.198	91
all-unigene001676	351	gi|55583929	dof47_arath ame: full=dof zinc finger protein short=	3.4532e-18	63	90.1225	86
all-unigene001678	381	gi|482553269	basic helix-loop-helix domain-containing protein	2.29596e-45	86	156.377	113
all-unigene001681	686	gi|75317773	y4200_arath ame: full=uncharacterized protein at4g02000	1e-05	47	37.7354	78
all-unigene001686	626	gi|75335311	nrpd1_arath ame: full=dna-directed rna polymerase d subunit 1 short= 1a short=nuclear rna polymerase d 1a ame: full=protein rna-directed dna methylation defective 3 ame: full=protein silencing defective 4 ame: full=protein silencing movement deficient 2 ame: full=rna polymerase iv subunit 1a short=pol iv 1a	6.13841e-102	92	369.777	208
all-unigene001687	672	gi|6226864	gar2_schpo ame: full=protein gar2	1e-05	38	35.8094	172
all-unigene001688	340	gi|264664489	y3475_arath ame: full=probable lrr receptor-like serine threonine-protein kinase at3g47570 flags: precursor	2.59939e-21	80	100.523	76
all-unigene001689	2695	gi|15218368	non-ltr retroelement reverse transcriptase	4.2335e-42	53	166.007	295
all-unigene001692	334	gi|21592602	ac007296_14 ests gb	3.039e-30	89	117.087	86
all-unigene001694	621	gi|357436143	nadh-ubiquinone oxidoreductase chain	5.33295e-25	92	108.997	56
all-unigene001697	436	gi|75181297	pcs1l_arath ame: full=aspartic proteinase pcs1 ame: full=aspartic protease 38 short= 38 ame: full=protein embryo defective 24 ame: full=protein promotion of cell survival 1 flags: precursor	6.9596e-79	100	291.967	145
all-unigene001704	234	gi|75333632	pub42_arath ame: full= u-box domain-containing protein 42 ame: full=plant u-box protein 42	3.64352e-15	70	80.1073	89
all-unigene001708	232	gi|257051052	fbd18_arath ame: full=fbd-associated f-box protein at5g44490	2.36895e-14	62	77.411	77
all-unigene001710	466	gi|482568086	gag-pol polyprotein	7.94164e-28	71	115.931	87
all-unigene001711	303	gi|75191439	y1143_arath ame: full=probable lrr receptor-like serine threonine-protein kinase at1g14390 flags: precursor	1.34187e-17	84	88.1965	64
all-unigene001729	315	gi|46396023	drl20_arath ame: full=probable disease resistance protein at1g63360	1.36577e-14	58	78.1814	106
all-unigene001712	293	gi|81659586	pdxh_rhoba ame: full=pyridoxine pyridoxamine 5 -phosphate oxidase ame: full=pnp pmp oxidase short=pnpox ame: full=pyridoxal 5 -phosphate synthase	1e-05	68	32.7278	44
all-unigene001713	322	gi|75206038	pp147_arath ame: full=pentatricopeptide repeat-containing protein mitochondrial flags: precursor	1.39238e-51	96	201.06	106
all-unigene001716	255	gi|297841625	hypothetical protein ARALYDRAFT_894678	2.53909e-17	78	83.1889	89
all-unigene001719	352	gi|442580990	tpx2_arath ame: full=protein tpx2 short= 2 ame: full=targeting protein for xklp2	2.47473e-16	72	83.9593	79
all-unigene001720	244	gi|42559318	nu2m_arath ame: full=nadh-ubiquinone oxidoreductase chain 2 ame: full=nadh dehydrogenase subunit 2	1.19984e-26	98	118.242	64
all-unigene001721	411	gi|172048008	rs4b_alkoo ame: full=30s ribosomal protein s4 b	1e-05	54	33.8834	57
all-unigene001722	286	gi|75206861	pp320_arath ame: full=pentatricopeptide repeat-containing protein chloroplastic flags: precursor	2.38111e-43	95	173.711	94
all-unigene001725	277	gi|75174733	fmo1_arath ame: full=probable flavin-containing monooxygenase 1	4.10113e-43	93	172.94	92
all-unigene001726	247	gi|75170788	gdl87_arath ame: full=gdsl esterase lipase at5g55050 ame: full=extracellular lipase at5g55050 flags: precursor	2.16801e-36	96	150.599	82
all-unigene001727	366	gi|75262699	fdl38_arath ame: full=f-box fbd lrr-repeat protein at5g56420	6.2469e-07	59	41.5874	62
all-unigene001728	516	gi|226706360	cinal_cyap8 ame: full= -like protein	1e-05	47	33.113	51
all-unigene001730	251	gi|6587849	non-ltr retroelement reverse transcriptase	7.8813e-12	70	69.707	51
all-unigene001731	208	gi|2498834	rbf1_canal ame: full=transcription factor rbf1 ame: full=rpg-box-binding factor ame: full=repressor-activator protein 1	1e-05	58	33.8834	55
all-unigene001734	228	gi|75313128	cp41b_arath ame: full=chloroplast stem-loop binding protein of 41 kda chloroplastic short=csp41-b ame: full=heteroglycan-interacting protein ame: full=protein chloroplast rna binding ame: full=protein gb5f flags: precursor	1.06575e-11	91	68.5514	36
all-unigene001735	215	gi|75220012	agd7_arath ame: full=adp-ribosylation factor gtpase-activating protein agd7 short=arf gap agd7 ame: full=protein arf-gap domain 7 short= 7 ame: full=protein pde1 suppressor 1	1.07883e-11	57	68.5514	71
all-unigene001738	306	gi|75333659	crk2_arath ame: full=cysteine-rich receptor-like protein kinase 2 short=cysteine-rich rlk2 flags: precursor	3.29426e-16	95	83.5741	41
all-unigene001739	220	gi|261865355	retrotransposon unclassified	4.95141e-15	75	75.0998	66
all-unigene001740	428	gi|75274055	pp244_arath ame: full=pentatricopeptide repeat-containing protein at3g20730	8.46651e-55	86	211.846	142
all-unigene001741	212	gi|482572220	myb transcription factor	1.96706e-29	91	114.775	62
all-unigene001743	277	gi|290894662	small uorf	1.02011e-14	100	71.633	34
all-unigene001742	336	gi|75100697	y4117_arath ame: full= disease resistance protein at4g11170	2.20803e-20	63	97.4413	111
all-unigene001744	237	gi|75155951	y4295_arath ame: full=upf0725 protein at4g29550	1.38346e-06	67	51.6026	61
all-unigene001745	257	gi|126296	lin1_nycco ame: full=line-1 reverse transcriptase homolog	1e-05	49	45.8246	73
all-unigene001746	664	gi|193806037	int9_nemve ame: full=integrator complex subunit 9 homolog	2.21742e-23	54	108.997	193
all-unigene001747	384	gi|6996258	non-ltr retroelement reverse transcriptase	1.05018e-12	70	73.559	62
all-unigene001750	511	gi|141475	ytx2_xenla ame: full=transposon tx1 uncharacterized 149 kda protein ame: full=orf 2	7.27182e-19	57	93.2041	166
all-unigene001751	218	gi|75174092	pp360_arath ame: full=pentatricopeptide repeat-containing protein at5g01110	1.07058e-27	91	121.709	74
all-unigene001752	466	gi|88913530	msi5_arath ame: full=wd-40 repeat-containing protein msi5	2.26259e-68	86	257.299	154
all-unigene001755	321	gi|218546751	pp143_arath ame: full= pentatricopeptide repeat-containing protein at2g02150	5.29103e-51	95	199.134	106
all-unigene001756	230	gi|12229670	hma5_arath ame: full= copper-transporting atpase hma5 ame: full=protein heavy metal atpase 5 ame: full= copper-transporting atpase 3	2.13091e-28	85	124.02	75
all-unigene001758	290	gi|152031718	ttf2_mouse ame: full=transcription termination factor 2 ame: full=rna polymerase ii termination factor ame: full=transcription release factor 2	1e-05	62	32.3426	40
all-unigene001760	253	gi|334186313	cysteine histidine-rich c1 domain-containing protein	3.16555e-25	72	107.071	83
all-unigene001761	1277	gi|75100697	y4117_arath ame: full= disease resistance protein at4g11170	5.04448e-54	53	212.231	422
all-unigene001762	657	gi|75265378	erf18_arath ame: full=ethylene-responsive transcription factor erf018	7.95611e-42	88	170.244	104
all-unigene001764	378	gi|21431838	rl182_arath ame: full=60s ribosomal protein l18-2	3.67792e-52	92	202.986	119
all-unigene001765	288	gi|55583983	xrcc3_arath ame: full=dna repair protein xrcc3 homolog ame: full=x-ray repair cross-complementing protein 3 homolog short= 3	9.65814e-37	80	151.754	96
all-unigene001766	320	gi|4512630	dnase i-like superfamily protein	6.63129e-28	68	117.087	106
all-unigene001767	324	gi|75171558	pp430_arath ame: full=pentatricopeptide repeat-containing protein chloroplastic flags: precursor	3.19918e-48	95	189.889	107
all-unigene001769	305	gi|75097079	y1719_arath ame: full=probable inactive receptor kinase at1g27190 flags: precursor	2.70113e-10	55	63.929	95
all-unigene001774	310	gi|82000189	dhcr7_mimiv ame: full=probable 7-dehydrocholesterol reductase short=7-dhc reductase ame: full=sterol delta -reductase	1e-05	56	33.113	57
all-unigene001771	301	gi|3805758	gag-protease polyprotein	7.97505e-08	60	58.151	60
all-unigene001773	257	gi|75171830	pp410_arath ame: full= pentatricopeptide repeat-containing protein at5g40405	2.46868e-16	71	83.9593	87
all-unigene001775	206	gi|223635616	pp323_arath ame: full=pentatricopeptide repeat-containing protein mitochondrial flags: precursor	3.73294e-20	94	96.6709	52
all-unigene001776	323	gi|75317981	myb12_arath ame: full=transcription factor myb12 ame: full=myb-related protein 12 short= 12	7.64998e-34	84	142.124	94
all-unigene001777	700	gi|114152840	morc2_human ame: full=morc family cw-type zinc finger protein 2 ame: full=zinc finger cw-type coiled-coil domain protein 1	1e-05	54	41.2022	46
all-unigene001778	222	gi|263549150	y1341_arath ame: full=probable lrr receptor-like serine threonine-protein kinase at1g34110 flags: precursor	6.71144e-06	54	49.2914	74
all-unigene001779	267	gi|75334958	nik1_arath ame: full=protein nsp-interacting kinase 1 ame: full=lrr receptor-like serine threonine-protein kinase nik1 flags: precursor	1.02975e-06	54	51.9878	75
all-unigene001782	421	gi|186492270	protein	3.78922e-22	89	85.5001	56
all-unigene001781	444	gi|229891805	vf113_asfk5 ame: full= atp-dependent rna helicase d1133l	1e-05	49	35.039	83
all-unigene001783	223	gi|52782786	col16_arath ame: full=zinc finger protein constans-like 16	2.7122e-23	85	107.071	76
all-unigene001787	277	gi|218546765	pp205_arath ame: full= pentatricopeptide repeat-containing protein at3g01580	1.51648e-21	88	101.293	61
all-unigene001785	311	gi|482561487	hypothetical protein CARUB_v10019029mg	2.12645e-22	69	97.4413	100
all-unigene001788	290	gi|75318500	y1747_arath ame: full=inactive serine threonine-protein kinase at1g67470	1.2702e-12	66	71.633	83
all-unigene001789	221	gi|240254091	cop1-interacting protein	3.10338e-19	73	90.5077	82
all-unigene001791	275	gi|50400819	mbd4_human ame: full=methyl- -binding domain protein 4 ame: full=methyl- -binding endonuclease 1 ame: full=methyl- -binding protein mbd4 ame: full=mismatch-specific dna n-glycosylase	1e-05	43	32.3426	85
all-unigene001792	489	gi|374095393	fbd29_arath ame: full= fbd-associated f-box protein at5g56820	1.84705e-10	57	65.0846	83
all-unigene001796	381	gi|81868408	luzp1_rat ame: full=leucine zipper protein 1 ame: full=leucine zipper motif-containing protein	1e-05	49	42.743	121
all-unigene001797	301	gi|147641194	def2_trikh ame: full=defensin tk-amp-d2	8.99298e-19	85	92.0485	49
all-unigene001798	262	gi|297817770	ubx domain-containing protein 6-like	2.37326e-14	74	75.8702	62
all-unigene001800	267	gi|75116713	gdl62_arath ame: full=gdsl esterase lipase at4g10955	1.29962e-09	55	61.6178	80
all-unigene001801	354	gi|75099062	sdd1_arath ame: full=subtilisin-like protease sdd1 ame: full=cucumisin-like serine protease sdd1 ame: full=protein stomatal density and distribution 1 flags: precursor	1.6078e-07	56	54.6842	85
all-unigene001802	343	gi|110287680	mpk8_arath ame: full=mitogen-activated protein kinase 8 short= 8 short=map kinase 8	4.3955e-15	52	68.9366	106
all-unigene001804	328	gi|75263871	dot3_arath ame: full= btb poz domain-containing protein dot3 ame: full=protein defectively organized tributaries 3	7.84493e-39	85	158.688	107
all-unigene001807	235	gi|51338834	clv1_arath ame: full=receptor protein kinase clavata1 flags: precursor	1e-05	60	32.3426	51
all-unigene001808	233	gi|77416680	cysi_blofl ame: full=sulfite reductase hemoprotein beta-component short= -hp short=	1e-05	56	32.3426	46
all-unigene001809	468	gi|75265626	fbd10_arath ame: full= fbd-associated f-box protein at3g50710	4.03108e-33	68	140.198	157
all-unigene001810	291	gi|75337597	pepr1_arath ame: full=leucine-rich repeat receptor-like protein kinase pepr1 ame: full=elicitor peptide 1 receptor 1 short=pep1 receptor 1 flags: precursor	5.29459e-27	87	119.398	70
all-unigene001811	316	gi|460425444	wtr5_arath ame: full=wat1-related protein at1g21890	5.20831e-17	59	67.0106	59
all-unigene001813	368	gi|75097079	y1719_arath ame: full=probable inactive receptor kinase at1g27190 flags: precursor	2.01629e-15	82	55.0694	41
all-unigene001814	210	gi|75311556	bh034_arath ame: full=transcription factor bhlh34 ame: full=basic helix-loop-helix protein 34 short= 34 short=bhlh 34 ame: full=transcription factor en 135 ame: full=bhlh transcription factor bhlh034	1.20002e-10	72	65.0846	61
all-unigene001816	264	gi|130582	polx_tobac ame: full=retrovirus-related pol polyprotein from transposon tnt 1-94 includes: ame: full=protease includes: ame: full=reverse transcriptase includes: ame: full=endonuclease	7.89133e-15	66	78.9518	87
all-unigene001817	274	gi|334302851	rlp12_arath ame: full=receptor-like protein 12 short= 12 flags: precursor	1e-05	50	48.521	97
all-unigene001820	362	gi|67460973	opt9_arath ame: full=oligopeptide transporter 9 short= 9	1.38095e-35	88	147.902	86
all-unigene001826	281	gi|81051964	conserved hypothetical protein	3.55501e-28	96	113.235	56
all-unigene001830	554	gi|20532307	y2124_anasp ame: full=uncharacterized wd repeat-containing protein all2124	1e-05	46	34.2686	45
all-unigene001829	216	gi|18202079	rad50_pyrho ame: full=dna double-strand break repair rad50 atpase	1e-05	65	35.8094	47
all-unigene001831	291	gi|13432029	myo1a_chick ame: full=unconventional myosin-ia ame: full=brush border myosin i short=bbm-i short=bbmi ame: full=myosin i heavy chain short=mihc	9.72557e-13	58	72.0182	85
all-unigene001832	305	gi|121531	gp1ba_human ame: full=platelet glycoprotein ib alpha chain short=gp-ib alpha short=gpib-alpha short=gp short=glycoprotein ibalpha ame: full=antigen cd42b-alpha ame: cd_antigen=cd42b contains: ame: full=glycocalicin flags: precursor	1e-05	43	36.965	55
all-unigene001833	272	gi|242095086	retrotransposon unclassified	1.33903e-09	85	58.5362	35
all-unigene001835	425	gi|75204605	pp218_arath ame: full=pentatricopeptide repeat-containing protein mitochondrial flags: precursor	5.17174e-49	76	192.586	161
all-unigene001836	460	gi|1175775	y1573_laclm ame: full=uncharacterized protein llmg_1573 ame: full=orf4	1e-05	49	33.113	61
all-unigene001840	240	gi|75151394	y3975_arath ame: full=fbd domain-containing protein at3g58975	8.39907e-07	79	50.8322	39
all-unigene001842	202	gi|122223702	clah1_arath ame: full=clathrin heavy chain 1	2.33976e-30	98	130.568	67
all-unigene001843	398	gi|334302851	rlp12_arath ame: full=receptor-like protein 12 short= 12 flags: precursor	1.79508e-22	64	104.375	131
all-unigene001844	615	gi|75213543	pp344_arath ame: full=pentatricopeptide repeat-containing protein chloroplastic ame: full=protein proton gradient regulation 3 flags: precursor	3.95646e-61	77	234.187	195
all-unigene001847	346	gi|75248498	fb254_arath ame: full=f-box protein at5g07670	9.10817e-35	90	145.206	83
all-unigene001850	388	gi|73919273	eapp_mouse ame: full=e2f-associated phosphoprotein short=eapp	7.91431e-07	46	52.373	90
all-unigene001855	539	gi|26454629	ggh_arath ame: full=gamma-glutamyl hydrolase ame: full=conjugase ame: full=gh ame: full=gamma-glu-x carboxypeptidase flags: precursor	3.10806e-18	63	91.2781	104
all-unigene001858	748	gi|75174733	fmo1_arath ame: full=probable flavin-containing monooxygenase 1	1.96108e-122	94	438.343	236
all-unigene001863	435	gi|75309222	c86b1_arath ame: full=cytochrome p450 86b1	4.33988e-09	44	60.077	143
all-unigene001865	231	gi|297799812	early-responsive to dehydration stress-related protein	6.62947e-20	100	92.0485	45
all-unigene001866	244	gi|482569175	mitochondrial transcription termination factor family protein	1.62944e-24	78	103.605	80
all-unigene001868	1007	gi|75210438	y4289_arath ame: full=upf0725 protein at4g28920	2.30113e-32	61	139.813	186
all-unigene001869	1097	gi|75210438	y4289_arath ame: full=upf0725 protein at4g28920	2.66271e-61	63	236.113	287
all-unigene001870	301	gi|218526158	pp296_arath ame: full=pentatricopeptide repeat-containing protein at3g63370	9.56371e-37	88	151.754	94
all-unigene001871	286	gi|14286045	ycxc_astlo ame: full=uncharacterized kda protein in rps4-rps11 intergenic region ame: full=orf426	1e-05	47	33.113	65
all-unigene001874	325	gi|51338727	h42_wheat ame: full=histone h4 variant th091	1.26255e-20	100	98.2117	48
all-unigene001877	245	gi|117020	cox2_human ame: full=cytochrome c oxidase subunit 2 ame: full=cytochrome c oxidase polypeptide ii	1.98074e-13	76	74.3294	51
all-unigene001878	466	gi|313471776	y1670_arath ame: full=probable receptor-like protein kinase at1g67000 flags: precursor	6.07539e-42	66	169.474	154
all-unigene001883	210	gi|297844524	phosphatidylinositol-glycan class	1.02183e-16	77	79.7221	61
all-unigene001884	351	gi|62901336	thyx_wolpm ame: full=thymidylate synthase short=ts short=tsase	1e-05	51	32.3426	72
all-unigene001886	221	gi|75171407	fla21_arath ame: full=fasciclin-like arabinogalactan protein 21 flags: precursor	6.70082e-22	81	102.449	75
all-unigene001887	362	gi|297803212	no pollen germination related 2 isoform 1	1.19909e-58	86	202.216	125
all-unigene001888	434	gi|125987635	rnhx1_arath ame: full= ribonuclease h protein at1g65750	1e-05	40	45.8246	122
all-unigene001889	211	gi|75328865	try_arath ame: full=transcription factor try ame: full=protein triptychon	2.84104e-20	97	97.0561	48
all-unigene001890	441	gi|75318808	sd18_arath ame: full=receptor-like serine threonine-protein kinase sd1-8 ame: full=arabidopsis thaliana receptor kinase 3 ame: full=s-domain-1 receptor kinase 8 short=sd1-8 flags: precursor	1.32747e-08	56	58.5362	81
all-unigene001891	367	gi|297802900	myosin heavy chain-related protein	4.26336e-65	90	213.772	122
all-unigene001893	344	gi|54035818	clpb_meiru ame: full=chaperone protein	1e-05	53	35.8094	71
all-unigene001894	722	gi|3913894	if2_aquae ame: full=translation initiation factor if-2	1e-05	42	34.2686	110
all-unigene001896	253	gi|75335653	y3565_arath ame: full=probable inactive receptor-like protein kinase at3g56050 flags: precursor	1.10649e-32	89	138.272	84
all-unigene001897	1626	gi|146291076	yi31b_yeast ame: full=transposon ty3-i gag-pol polyprotein ame: full=gag3-pol3 ame: full=transposon ty3-2 tya-tyb polyprotein contains: ame: full=capsid protein short=ca ame: full=p24 contains: ame: full=spacer peptide p3 contains: ame: full=nucleocapsid protein p11 short=nc contains: ame: full=ty3 protease short=pr ame: full=p16 contains: ame: full=spacer peptide j contains: ame: full=reverse tr…	1.29359e-60	52	234.572	441
all-unigene001902	994	gi|75170596	p2a08_arath ame: full=protein phloem protein 2-like a8 short= 2-a8	7.76376e-33	65	141.354	181
all-unigene001901	222	gi|75337460	y3463_arath ame: full= receptor-like protein kinase at3g46340 flags: precursor	4.66204e-07	64	53.1434	56
all-unigene001903	547	gi|112684	1433a_horvu ame: full=14-3-3-like protein a short=14-3-3a	3.69834e-91	100	333.569	168
all-unigene001904	345	gi|482563602	ring fyve phd zinc finger-containing protein	4.42266e-12	71	68.5514	77
all-unigene001905	227	gi|82182770	uxs1_xentr ame: full=udp-glucuronic acid decarboxylase 1 ame: full=udp-glucuronate decarboxylase 1 short=uxs-1	1e-05	48	46.595	81
all-unigene001906	1342	gi|75207690	pp269_arath ame: full=pentatricopeptide repeat-containing protein chloroplastic flags: precursor	0	93	738.028	415
all-unigene001907	688	gi|75222188	pp272_arath ame: full=pentatricopeptide repeat-containing protein chloroplastic ame: full=protein embryo defective 2261 flags: precursor	2.06783e-120	96	431.409	225
all-unigene001908	428	gi|125987635	rnhx1_arath ame: full= ribonuclease h protein at1g65750	1e-05	49	38.1206	59
all-unigene001910	238	gi|482565200	hypothetical protein CARUB_v10025678mg	5.1249e-11	84	64.3142	52
all-unigene001909	276	gi|122242333	ppr36_arath ame: full=pentatricopeptide repeat-containing protein mitochondrial flags: precursor	1e-05	68	47.3654	64
all-unigene001911	233	gi|13124800	plda1_arath ame: full=phospholipase d alpha 1 short= alpha1 short=pld alpha 1 ame: full=choline phosphatase 1 ame: full=pldalpha ame: full=phosphatidylcholine-hydrolyzing phospholipase d 1	3.76459e-28	91	123.25	70
all-unigene001912	567	gi|75220012	agd7_arath ame: full=adp-ribosylation factor gtpase-activating protein agd7 short=arf gap agd7 ame: full=protein arf-gap domain 7 short= 7 ame: full=protein pde1 suppressor 1	4.21752e-16	64	84.3445	71
all-unigene001915	367	gi|296439507	co1a2_human ame: full=collagen alpha-2 chain ame: full=alpha-2 type i collagen flags: precursor	1e-05	45	40.4318	46
all-unigene001916	319	gi|75315838	rhf2a_arath ame: full=e3 ubiquitin-protein ligase rhf2a ame: full=ring-h2 zinc finger protein rhf2a	5.01001e-09	51	59.6918	94
all-unigene001917	406	gi|75318755	lrk44_arath ame: full=l-type lectin-domain containing receptor kinase short= - flags: precursor	3.34067e-29	78	126.716	95
all-unigene001918	334	gi|182702259	ycf1_olipu ame: full= membrane protein ycf1	5.77033e-45	84	179.104	113
all-unigene001921	762	gi|6587849	non-ltr retroelement reverse transcriptase	1.41214e-30	52	110.153	177
all-unigene001922	455	gi|85541754	nmt1_arath ame: full=glycylpeptide n-tetradecanoyltransferase 1 ame: full=myristoyl- :protein n-myristoyltransferase 1 short=nmt 1 short=type i n-myristoyltransferase 1 ame: full=peptide n-myristoyltransferase 1	2.7122e-39	98	160.614	81
all-unigene001924	219	gi|302142281	chromosome-associated kinesin kif4a-like	9.34308e-07	59	54.299	67
all-unigene001926	350	gi|75207393	pub9_arath ame: full=u-box domain-containing protein 9 ame: full=plant u-box protein 9	5.32129e-35	81	145.976	99
all-unigene001927	548	gi|127733	myro_brana ame: full=myrosinase ame: full=sinigrinase ame: full=thioglucosidase flags: precursor	7.49284e-60	83	229.565	156
all-unigene001928	295	gi|75309253	nimi1_arath ame: full=protein nim1-interacting 1 short=protein nimin-1	1.82395e-19	66	94.3597	98
all-unigene001931	318	gi|226711456	ctu1_arath ame: full=cytoplasmic trna 2-thiolation protein 1 ame: full=cytoplasmic trna adenylyltransferase 1	1e-05	60	45.4394	46
all-unigene001932	335	gi|297821236	tic-like protein	1.20186e-13	65	55.4546	47
all-unigene001933	320	gi|79450170	armadillo beta-catenin-like repeat-containing protein	3.46976e-07	85	56.6102	48
all-unigene001936	823	gi|75333799	pub50_arath ame: full= u-box domain-containing protein 50 ame: full=plant u-box protein 50	3.58503e-67	68	254.988	222
all-unigene001937	390	gi|116270727	fla19_arath ame: full=fasciclin-like arabinogalactan protein 19 flags: precursor	1.77451e-29	84	83.1889	58
all-unigene001939	998	gi|1170468	iap1_npvac ame: full=apoptosis inhibitor 1 ame: full=iap-1	1e-05	58	45.8246	36
all-unigene001940	314	gi|166215962	cmtb_psep1 ame: full= -dihydroxy- -dihydro-p-cumate dehydrogenase ame: full=biphenyl- -dihydro- -diol dehydrogenase	1e-05	58	32.3426	50
all-unigene001942	247	gi|130708	pp1_brana ame: full=serine threonine-protein phosphatase pp1	2.39146e-43	98	173.711	82
all-unigene001941	603	gi|51338626	rl19_rat ame: full=60s ribosomal protein l19	1.12789e-57	88	222.631	124
all-unigene001943	480	gi|229807544	dor_arath ame: full=f-box protein dor ame: full=protein drought tolerance repressor	1.18649e-38	65	158.688	157
all-unigene001945	224	gi|75274407	lor12_arath ame: full=protein lurp-one-related 12	1.39294e-19	83	94.7449	61
all-unigene001944	618	gi|130582	polx_tobac ame: full=retrovirus-related pol polyprotein from transposon tnt 1-94 includes: ame: full=protease includes: ame: full=reverse transcriptase includes: ame: full=endonuclease	8.03287e-10	63	46.2098	68
all-unigene001946	312	gi|11994561	cysteine histidine-rich c1 domain-containing protein	3.08657e-23	68	101.293	97
all-unigene001949	286	gi|1169451	ea6_arath ame: full=probable glucan endo- -beta-glucosidase a6 ame: full=(1-	2.47551e-24	76	110.538	94
all-unigene001951	242	gi|166225922	blh4_arath ame: full=bel1-like homeodomain protein 4 short=bel1-like protein 4 ame: full=protein sawtooth 2	1.8468e-35	95	147.517	80
all-unigene001957	535	gi|129032	odba_rat ame: full=2-oxoisovalerate dehydrogenase subunit mitochondrial ame: full=branched-chain alpha-keto acid dehydrogenase e1 component alpha chain short=bckde1a short=bckdh e1-alpha flags: precursor	1e-05	50	36.965	63
all-unigene001958	507	gi|129032	odba_rat ame: full=2-oxoisovalerate dehydrogenase subunit mitochondrial ame: full=branched-chain alpha-keto acid dehydrogenase e1 component alpha chain short=bckde1a short=bckdh e1-alpha flags: precursor	1e-05	50	36.965	63
all-unigene001960	1237	gi|2498731	p1_arath ame: full=nadp-dependent alkenal double bond reductase p1 short=dbr1	4.3295e-111	75	401.749	345
all-unigene001959	557	gi|215273869	ppib_human ame: full=peptidyl-prolyl cis-trans isomerase b short=ppiase b ame: full=cyp-s1 ame: full=cyclophilin b ame: full=rotamase b ame: full=s-cyclophilin short=scylp flags: precursor	2.96591e-59	82	227.639	149
all-unigene001962	280	gi|22325518	beta-galactosidase related protein	4.04941e-06	65	51.9878	44
all-unigene001963	324	gi|75206004	ysl7_arath ame: full=probable metal-nicotianamine transporter ysl7 ame: full=protein yellow stripe like 7 short= 7	1.29447e-49	96	194.512	103
all-unigene001965	253	gi|89257585	inner membrane protein oxa1-related	4.58824e-14	72	73.559	86
all-unigene001966	520	gi|89257447	ribosomal protein	1.62613e-56	76	194.126	138
all-unigene001967	558	gi|378405175	e13b_vitvi ame: full=glucan endo- -beta-glucosidase ame: full=(1-	2.45457e-21	59	101.679	144
all-unigene001968	361	gi|585078	e13f_horvu ame: full= glucan endo- -beta-glucosidase gvi ame: full=(1-	1.29854e-17	65	88.1965	82
all-unigene001970	257	gi|114152156	sfgh_arath ame: full=s-formylglutathione hydrolase short= ame: full=esterase d	1.947e-29	91	127.487	69
all-unigene001971	354	gi|75098527	fah1_arath ame: full=fatty acid 2-hydroxylase 1 short= 1	4.80738e-28	98	122.865	58
all-unigene001973	341	gi|119368803	yo13a_yeast ame: full=uncharacterized protein yol013w-a	1e-05	66	36.965	36
all-unigene001975	339	gi|119368803	yo13a_yeast ame: full=uncharacterized protein yol013w-a	1e-05	62	38.5058	40
all-unigene001976	268	gi|75100697	y4117_arath ame: full= disease resistance protein at4g11170	7.86357e-18	68	88.9669	87
all-unigene001977	316	gi|224079045	protein	8.55266e-22	72	92.0485	74
all-unigene001978	304	gi|30685124	acyl hydrolase	8.53637e-06	88	51.9878	34
all-unigene001983	403	gi|122180059	y5547_arath ame: full=b3 domain-containing protein at5g25470	1.15507e-21	78	101.679	75
all-unigene001979	711	gi|75100697	y4117_arath ame: full= disease resistance protein at4g11170	8.76329e-61	74	233.417	204
all-unigene001980	314	gi|297804552	hypothetical protein ARALYDRAFT_329873	1.08939e-10	58	63.929	81
all-unigene001982	528	gi|15223769	sequence-specific dna binding transcription factor	5.47711e-23	59	102.449	129
all-unigene001986	361	gi|75164334	cspli_arath ame: full=casp-like protein at3g53850	1.06474e-11	94	68.5514	37
all-unigene001987	287	gi|75305763	bh137_arath ame: full=transcription factor bhlh137 ame: full=basic helix-loop-helix protein 137 short= 137 short=bhlh 137 ame: full=transcription factor en 89 ame: full=bhlh transcription factor bhlh137	1.76586e-38	91	157.532	94
all-unigene001990	558	gi|122214363	pp392_arath ame: full=pentatricopeptide repeat-containing protein at5g18475	4.20351e-53	91	207.223	122
all-unigene001992	472	gi|74730818	s35f5_human ame: full=solute carrier family 35 member f5 ame: full=hepatitis c virus ns5a-transactivated protein 3 short=hcv ns5a-transactivated protein 3	1e-05	62	43.5134	48
all-unigene001993	275	gi|24212017	mdn1_human ame: full=midasin ame: full=midas-containing protein	2.06095e-10	84	64.3142	38
all-unigene001998	601	gi|75308786	acch2_arath ame: full=1-aminocyclopropane-1-carboxylate oxidase homolog 2	2.32468e-95	90	347.821	199
all-unigene002000	459	gi|3687234	copia-like retroelement pol polyprotein	4.82164e-11	65	69.707	78
all-unigene002003	211	gi|117505	calr_rat ame: full=calreticulin ame: full=calbp ame: full=crp55 ame: full=calcium-binding protein 3 short=cabp3 ame: full=calregulin ame: full=endoplasmic reticulum resident protein 60 short=erp60 ame: full=hacbp flags: precursor	2.82789e-36	100	150.214	70
all-unigene002002	253	gi|62900604	kin11_arath ame: full=snf1-related protein kinase catalytic subunit alpha kin11 short=akin11 ame: full=akin alpha-1 short=akinalpha1	4.33101e-45	100	179.489	84
all-unigene002004	962	gi|46576532	arfq_arath ame: full=auxin response factor 17	3.00393e-18	44	92.8189	207
all-unigene002005	278	gi|75278861	aae4_arath ame: full=probable acyl-activating enzyme 4 ame: full=amp-binding protein 4 short= 4	7.5262e-21	94	98.9821	53
all-unigene002008	659	gi|75334877	ragp1_arath ame: full=ran gtpase-activating protein 1 short= angap1 short= 1	9.28991e-83	86	306.22	208
all-unigene002009	495	gi|7529250	retroelement pol polyprotein	8.75363e-06	71	53.1434	39
all-unigene002010	371	gi|75171788	mtbc_arath ame: full=probable bifunctional methylthioribulose-1-phosphate dehydratase enolase-phosphatase e1 includes: ame: full=methylthioribulose-1-phosphate dehydratase short=mtru-1-p dehydratase includes: ame: full=enolase-phosphatase e1 ame: full= -diketo-5-methylthio-1-phosphopentane phosphatase	1e-05	73	48.521	34
all-unigene002011	1120	gi|74608736	gsm1_canga ame: full=glucose starvation modulator protein 1	1e-05	52	37.3502	63
all-unigene002014	412	gi|238065083	ino80_arath ame: full=dna helicase ino80 short= 80 ame: full= dna helicase ino80 complex homolog 1	9.98448e-26	76	115.161	86
all-unigene002015	287	gi|75160514	pex16_arath ame: full=peroxisome biogenesis protein 16 ame: full=peroxin-16 short= 16 short= ex16p ame: full=protein shrunken seed 1	2.63873e-34	84	143.665	95
all-unigene002016	678	gi|6685597	chkb_mouse ame: full=choline ethanolamine kinase ame: full=choline kinase beta short=ck short=ckb ame: full=ethanolamine kinase short=ek ame: full=choline ethanolamine kinase beta short=ckekb	9.51385e-30	54	130.183	220
all-unigene002017	893	gi|73917651	capp3_arath ame: full=phosphoenolpyruvate carboxylase 3 short= 3 short=pepc 3 short=pepcase 3	4.25086e-165	98	580.482	298
all-unigene002019	202	gi|75332091	hdg2_arath ame: full=homeobox-leucine zipper protein hdg2 ame: full=hd-zip protein hdg2 ame: full=homeodomain glabra 2-like protein 2 ame: full=homeodomain transcription factor hdg2 ame: full=protein homeodomain glabrous 2	6.80765e-30	97	129.028	67
all-unigene002021	714	gi|238064987	hial1_bovin ame: full=hippocampus abundant transcript-like protein 1	2.8818e-11	49	68.9366	141
all-unigene002022	451	gi|109940222	anr35_human ame: full=ankyrin repeat domain-containing protein 35	1e-05	56	36.965	50
all-unigene002023	374	gi|75273386	c3h38_arath ame: full=zinc finger ccch domain-containing protein 38 short= 3h38	1.08142e-27	73	121.709	117
all-unigene002026	461	gi|231404	1b44_human ame: full=hla class i histocompatibility b-44 alpha chain ame: full=bw-44 ame: full=mhc class i antigen b*44 flags: precursor	1e-05	54	43.5134	51
all-unigene002027	469	gi|482557047	ring u-box domain-containing protein	1.87887e-22	89	99.7525	138
all-unigene002028	823	gi|44888996	syep_drome ame: full=bifunctional glutamate proline--trna ligase ame: full=bifunctional aminoacyl-trna synthetase includes: ame: full=glutamate--trna ligase ame: full=glutamyl-trna synthetase short= includes: ame: full=proline--trna ligase ame: full=prolyl-trna synthetase short=	6.55423e-29	66	97.4413	103
all-unigene002029	1161	gi|166201361	ubp12_arath ame: full=ubiquitin carboxyl-terminal hydrolase 12 ame: full=deubiquitinating enzyme 12 short= 12 ame: full=ubiquitin thioesterase 12 ame: full=ubiquitin-specific-processing protease 12	7.43789e-09	49	62.003	114
all-unigene002032	377	gi|75262730	fbl91_arath ame: full=f-box lrr-repeat protein at5g63520	5.5343e-24	78	109.383	80
all-unigene002036	461	gi|408360085	eya3_mouse ame: full=eyes absent homolog 3	1e-05	54	35.4242	51
all-unigene002037	276	gi|32699627	dip2_drome ame: full=disco-interacting protein 2	1e-05	63	34.6538	41
all-unigene002040	405	gi|15235439	catalytic pyridoxal phosphate binding protein	8.75384e-38	77	145.976	113
all-unigene002041	386	gi|20178285	dr100_arath ame: full=dna-damage-repair toleration protein drt100 flags: precursor	1e-05	56	44.2838	57
all-unigene002043	573	gi|150421517	aca9_arath ame: full=calcium-transporting atpase plasma membrane-type ame: full=ca(2+)-atpase isoform 9	3.29671e-32	54	137.887	190
all-unigene002042	446	gi|75220730	laml_arath ame: full=lamin-like protein flags: precursor	1.14157e-23	64	108.612	111
all-unigene002045	305	gi|334302784	drl25_arath ame: full= disease resistance protein at4g19050	1e-05	57	42.3578	63
all-unigene002044	278	gi|42560543	gr47b_drome ame: full= gustatory receptor 47b	1e-05	56	34.2686	60
all-unigene002046	456	gi|94707110	ashh2_arath ame: full=histone-lysine n-methyltransferase ashh2 ame: full=ash1 homolog 2 ame: full=h3-k4-hmtase ame: full=histone h3-k36 methyltransferase 8 short=h3-k36-hmtase 8 ame: full=protein early flowering in short days ame: full=protein set domain group 8	8.22323e-12	58	69.3218	110
all-unigene002049	218	gi|297853084	hypothetical protein ARALYDRAFT_892330	9.07917e-17	80	82.4185	61
all-unigene002052	434	gi|75172082	ku80_arath ame: full=atp-dependent dna helicase 2 subunit ku80 ame: full=atp-dependent dna helicase 2 subunit 2 ame: full=atp-dependent dna helicase ii 80 kda subunit	8.7041e-26	74	115.546	86
all-unigene002054	268	gi|254813736	mtnb_bacc7 ame: full=methylthioribulose-1-phosphate dehydratase short=mtru-1-p dehydratase	1e-05	52	37.7354	53
all-unigene002056	214	gi|1172704	ptr2_arath ame: full=peptide transporter ptr2 ame: full=histidine-transporting protein	1.96609e-13	85	74.3294	42
all-unigene002059	282	gi|75331078	aml5_arath ame: full=protein mei2-like 5 short=aml5 ame: full=mei2-like protein 5	1.73351e-09	87	61.2326	41
all-unigene002058	205	gi|281185495	tena_human ame: full=tenascin short=tn ame: full=cytotactin ame: full=gmem ame: full=gp 150-225 ame: full=glioma-associated-extracellular matrix antigen ame: full=hexabrachion ame: full=ji ame: full=myotendinous antigen ame: full=neuronectin ame: full=tenascin-c short=tn-c flags: precursor	2.10988e-31	98	134.035	68
all-unigene002060	496	gi|74960288	sre30_caeel ame: full=serpentine receptor class epsilon-30 short=protein sre-30	1e-05	51	33.113	56
all-unigene002063	418	gi|297791713	rna-directed dna polymerase (reverse transcriptase)-related family protein	9.15222e-38	70	142.124	129
all-unigene002065	247	gi|334302851	rlp12_arath ame: full=receptor-like protein 12 short= 12 flags: precursor	6.99043e-27	87	119.013	78
all-unigene002066	491	gi|334302851	rlp12_arath ame: full=receptor-like protein 12 short= 12 flags: precursor	1.02989e-16	82	85.8853	57
all-unigene002067	2087	gi|46396675	rps5_arath ame: full=disease resistance protein rps5 ame: full=resistance to pseudomonas syringae protein 5 ame: full=pnd3 pnd10	8.29037e-103	65	375.17	435
all-unigene002068	596	gi|482563897	argos	6.64259e-32	81	122.865	135
all-unigene002070	365	gi|75168993	ahk4_arath ame: full=histidine kinase 4 ame: full=arabidopsis histidine kinase 4 short= 4 ame: full=cytokinin receptor cytokinin response 1 short= 1 short=cytokinin receptor cre1 ame: full=phosphoprotein phosphatase ahk4 ame: full=protein authentic his-kinase 4 ame: full=protein root as in wol 1 ame: full=protein wooden leg	1.42032e-18	65	84.7297	83
all-unigene002071	691	gi|160358754	titin_mouse ame: full=titin ame: full=connectin	1e-05	42	36.965	138
all-unigene002074	492	gi|75171495	tcp6_arath ame: full=transcription factor tcp6	2.00065e-28	87	124.79	73
all-unigene002075	506	gi|482572304	hypothetical protein CARUB_v10011144mg	4.28438e-34	88	126.331	72
all-unigene002077	587	gi|75173863	utr4_arath ame: full=udp-galactose udp-glucose transporter 4 short= r4	1.67606e-103	98	374.785	195
all-unigene002083	318	gi|146291102	ak17a_human ame: full=a-kinase anchor protein 17a short=akap-17a ame: full=721p ame: full=b-lymphocyte antigen ame: full=protein xe7 ame: full=protein kinase a-anchoring protein 17a short=prka17a ame: full=splicing arginine serine-rich 17a	1e-05	61	33.8834	36
all-unigene002084	216	gi|75306367	gatp_arath ame: full=gamma-aminobutyrate transaminase mitochondrial short= -t ame: full=protein hexenal response 1 ame: full=protein pollen-pistil incompatibility 2 short= 2 flags: precursor	1.17305e-20	80	74.3294	42
all-unigene002085	302	gi|297828255	rna-directed dna polymerase (reverse transcriptase)-related family protein	2.91582e-06	79	53.1434	48
all-unigene002086	345	gi|84029371	nhx8_arath ame: full=sodium hydrogen exchanger 8 ame: full=na(+) h(+) exchanger 8 short=nhe-8 ame: full=protein salt overly sensitive 1b	1e-05	54	33.8834	61
all-unigene002088	428	gi|146345419	fbx31_human ame: full=f-box only protein 31	1e-05	59	32.3426	54
all-unigene002091	248	gi|75181119	gh312_arath ame: full=4-substituted benzoates-glutamate ligase ame: full=auxin-responsive gh3-like protein 12 short= 3-12 ame: full=protein gh3-like defense gene 1 ame: full=protein gretchen hagen ame: full=protein hopw1-1-interacting 3 ame: full=protein avrpphb susceptible 3	2.40816e-19	81	93.9745	65
all-unigene002092	591	gi|729775	hsf8_solpe ame: full=heat shock factor protein hsf8 ame: full=heat shock transcription factor 8 short=hstf 8 ame: full=heat stress transcription factor	2.59984e-11	62	68.5514	98
all-unigene002093	579	gi|729775	hsf8_solpe ame: full=heat shock factor protein hsf8 ame: full=heat shock transcription factor 8 short=hstf 8 ame: full=heat stress transcription factor	1e-05	58	48.9062	74
all-unigene002094	454	gi|75040209	strap_bovin ame: full=serine-threonine kinase receptor-associated protein	7.18721e-16	78	82.8037	52
all-unigene002095	259	gi|408360184	pdf1_schpo ame: full=palmitoyl-protein thioesterase-dolichyl pyrophosphate phosphatase fusion 1 contains: ame: full=palmitoyl-protein thioesterase short=ppt ame: full=palmitoyl-protein hydrolase contains: ame: full=dolichyldiphosphatase ame: full=dolichyl pyrophosphate phosphatase flags: precursor	1e-05	65	38.891	47
all-unigene002096	296	gi|30685302	ferredoxin 2	3.51304e-12	75	67.781	49
all-unigene002097	497	gi|297850040	ac006341_8contains a pf	4.98993e-13	70	48.9062	47
all-unigene002098	270	gi|118595720	ce290_mouse ame: full=centrosomal protein of 290 kda short=cep290 ame: full=bardet-biedl syndrome 14 protein homolog ame: full=nephrocystin-6	1e-05	63	32.3426	49
all-unigene002099	400	gi|75274201	nimi2_arath ame: full=protein nim1-interacting 2 short=protein nimin-2	3.84142e-33	72	139.813	113
all-unigene002100	345	gi|508781282	c-terminal cysteine residue is changed to a serine 1	3.28821e-07	82	53.5286	35
all-unigene002101	221	gi|297821240	mediator of aba-regulated dormancy 1	1.45766e-15	71	77.0258	67
all-unigene002104	453	gi|68565314	atl4_arath ame: full=e3 ubiquitin-protein ligase atl4 ame: full=protein arabidopsis toxicos en levadura 4 short=protein atl4 ame: full=ring-h2 finger protein atl4 ame: full=ring-h2 finger protein rhx1a	6.14213e-20	60	96.2857	107
all-unigene002108	498	gi|297807963	expressed protein	5.27301e-25	88	101.679	76
all-unigene002109	293	gi|46396675	rps5_arath ame: full=disease resistance protein rps5 ame: full=resistance to pseudomonas syringae protein 5 ame: full=pnd3 pnd10	1.02852e-38	86	158.303	97
all-unigene002110	356	gi|75168977	gdl20_arath ame: full=gdsl esterase lipase at1g54020 ame: full=extracellular lipase at1g54020 flags: precursor	6.01821e-47	86	185.652	118
all-unigene002111	360	gi|62900664	nol6_xentr ame: full=nucleolar protein 6	1e-05	63	34.2686	38
all-unigene002113	412	gi|296439505	ck5p2_human ame: full=cdk5 regulatory subunit-associated protein 2 ame: full=cdk5 activator-binding protein c48 ame: full=centrosome-associated protein 215	1e-05	52	32.3426	53
all-unigene002114	247	gi|482575462	hypothetical protein CARUB_v10008288mg, partial	1.18656e-09	76	63.1586	56
all-unigene002115	328	gi|482575462	hypothetical protein CARUB_v10008288mg, partial	6.22729e-08	60	58.9214	78
all-unigene002118	262	gi|482555179	lysosomal beta glucosidase-like	7.16113e-40	98	147.517	87
all-unigene002120	250	gi|482562927	hypothetical protein CARUB_v10023215mg	1.12687e-12	67	48.1358	37
all-unigene002123	593	gi|264664489	y3475_arath ame: full=probable lrr receptor-like serine threonine-protein kinase at3g47570 flags: precursor	1.53141e-35	73	149.058	130
all-unigene002126	366	gi|9945082	non-ltr retroelement reverse transcriptase	1.13275e-20	62	96.6709	120
all-unigene002128	457	gi|482565690	c2 domain-containing protein	1.79734e-12	95	73.559	46
all-unigene002133	266	gi|81892733	muc19_mouse ame: full=mucin-19 short=muc-19 ame: full=gel-forming secreted mucin-19 ame: full=sublingual apomucin flags: precursor	1e-05	53	34.6538	52
all-unigene002135	497	gi|297802416	hypothetical protein ARALYDRAFT_912841	2.75382e-07	68	57.7658	54
all-unigene002138	855	gi|193806279	pp103_arath ame: full=pentatricopeptide repeat-containing protein at1g64100	9.94655e-23	69	107.457	103
all-unigene002139	294	gi|75172412	geml4_arath ame: full=gem-like protein 4	1.59786e-15	92	81.2629	42
all-unigene002142	634	gi|313471776	y1670_arath ame: full=probable receptor-like protein kinase at1g67000 flags: precursor	2.96532e-35	66	148.288	148
all-unigene002144	390	gi|126296	lin1_nycco ame: full=line-1 reverse transcriptase homolog	7.09209e-40	77	162.155	129
all-unigene002148	288	gi|482553062	hypothetical protein CARUB_v10005530mg	2.2677e-10	91	63.1586	34
all-unigene002150	1136	gi|75278887	bh070_arath ame: full=transcription factor bhlh70 ame: full=basic helix-loop-helix protein 70 short= 70 short=bhlh 70 ame: full=transcription factor en 13 ame: full=bhlh transcription factor bhlh070	2.96694e-95	67	348.977	357
all-unigene002149	424	gi|193806502	ppr62_arath ame: full=pentatricopeptide repeat-containing protein mitochondrial flags: precursor	5.00481e-65	93	245.743	140
all-unigene002151	232	gi|55584006	dof16_arath ame: full=dof zinc finger protein short=	1e-05	55	48.1358	45
all-unigene002155	238	gi|482567854	alba dna rna-binding protein	5.97937e-14	82	71.633	45
all-unigene002156	1328	gi|44888115	m310_arath ame: full=uncharacterized mitochondrial protein g00310 ame: full=orf154	1.90739e-27	68	124.02	116
all-unigene002158	655	gi|29428218	pth2_mouse ame: full=peptidyl-trna hydrolase mitochondrial short=pth 2 flags: precursor	6.25959e-31	73	134.035	115
all-unigene002159	335	gi|75272176	fbl36_arath ame: full=f-box lrr-repeat protein at2g29930	1.37453e-17	81	67.0106	48
all-unigene002161	341	gi|30681041	spla ryanodine receptor domain-containing protein	8.40156e-23	77	100.138	76
all-unigene002163	293	gi|55584036	dof34_arath ame: full=dof zinc finger protein short= ame: full=obf-binding protein 1	5.10449e-38	81	155.992	106
all-unigene002165	368	gi|122244095	pp130_arath ame: full=pentatricopeptide repeat-containing protein at1g77405	1.32824e-33	92	141.354	78
all-unigene002166	289	gi|75120536	ycf46_gratl ame: full=uncharacterized aaa domain-containing protein ycf46	1e-05	54	32.7278	53
all-unigene002167	656	gi|4185148	non-ltr retroelement reverse transcriptase	1.97256e-23	47	67.781	121
all-unigene002168	332	gi|75169275	ago7_arath ame: full=protein argonaute 7 ame: full=protein zippy	5.64211e-13	70	72.7886	65
all-unigene002171	220	gi|297837377	s3 self-incompatibility locus-linked pollen protein isoform 2	2.70916e-23	96	101.293	51
all-unigene002173	737	gi|75097884	snc1_arath ame: full=protein suppressor of npr1- constitutive 1 short= 1 ame: full=disease resistance rpp5-like protein	2.96842e-55	56	128.257	153
all-unigene002174	234	gi|3641837	nonclathrin coat protein gamma-like protein	3.25853e-13	97	73.1738	34
all-unigene002175	476	gi|75311528	bh093_arath ame: full=transcription factor bhlh93 ame: full=basic helix-loop-helix protein 93 short= 93 short=bhlh 93 ame: full=transcription factor en 47 ame: full=bhlh transcription factor bhlh093	5.82909e-06	44	50.0618	161
all-unigene002179	640	gi|302595926	dar4_arath ame: full=protein da1-related 4	1.3814e-11	55	69.707	105
all-unigene002181	266	gi|75174038	lng1_arath ame: full=protein longifolia 1 ame: full=protein ton1 recruiting motif 2	1.02975e-06	62	51.9878	53
all-unigene002183	470	gi|75262377	fbd30_arath ame: full=fbd-associated f-box protein at5g60610	5.94213e-32	70	136.346	141
all-unigene002184	290	gi|121801	guna_celfi ame: full=endoglucanase a ame: full=cellulase a ame: full=endo- -beta-glucanase a flags: precursor	1e-05	50	33.4982	36
all-unigene002185	313	gi|195605042	transducin beta-like protein 2-like	2.0564e-40	98	147.902	71
all-unigene002186	561	gi|29428075	pskr1_arath ame: full=phytosulfokine receptor 1 short= 1 ame: full=phytosulfokine lrr receptor kinase 1 flags: precursor	2.24256e-78	88	291.197	172
all-unigene002187	205	gi|75332072	xb31_arath ame: full= e3 ubiquitin-protein ligase xbat31 ame: full=ankyrin repeat domain and ring finger-containing protein xbat31 ame: full=protein xb3 homolog 1	4.41982e-13	64	73.1738	76
all-unigene002188	355	gi|75332072	xb31_arath ame: full= e3 ubiquitin-protein ligase xbat31 ame: full=ankyrin repeat domain and ring finger-containing protein xbat31 ame: full=protein xb3 homolog 1	3.77832e-41	72	166.392	118
all-unigene002189	249	gi|75313880	cep3_arath ame: full=kdel-tailed cysteine endopeptidase cep3 flags: precursor	4.24095e-24	78	109.768	78
all-unigene002190	259	gi|306531056	apblc_arath ame: full=beta-adaptin-like protein c short=at-bc-ad short=at-betac-ad ame: full=ap complex subunit beta-c ame: full=adaptor protein complex ap subunit beta-c ame: full=beta-adaptin c ame: full=clathrin assembly protein complex beta large chain c	1.53071e-42	100	171.014	86
all-unigene002191	379	gi|312281503	protein	4.47967e-49	88	163.696	99
all-unigene002192	241	gi|27735259	vatb1_arath ame: full=v-type proton atpase subunit b1 short=v-atpase subunit b1 ame: full=v-atpase 57 kda subunit ame: full=vacuolar h(+)-atpase subunit b isoform 1 ame: full=vacuolar proton pump subunit b1	9.46293e-40	100	161.77	80
all-unigene002195	378	gi|1709767	prf1_sollc ame: full= kda proline-rich protein	3.35754e-21	75	100.138	81
all-unigene002196	572	gi|264664501	y2242_arath ame: full=probable lrr receptor-like serine threonine-protein kinase at2g24230 flags: precursor	1.96784e-85	87	314.694	187
all-unigene002197	1247	gi|75181168	med4_arath ame: full=mediator of rna polymerase ii transcription subunit 4	3.70267e-110	75	398.667	307
all-unigene002202	2246	gi|75318540	lrx1_arath ame: full=leucine-rich repeat extensin-like protein 1 short= 1 short=lrr extensin1 ame: full=cell wall hydroxyproline-rich glycoprotein flags: precursor	1e-05	60	44.2838	58
all-unigene002204	489	gi|75116576	y4141_arath ame: full=uncharacterized protein at4g14100 flags: precursor	3.67025e-59	92	226.868	118
all-unigene002207	255	gi|45477041	m810_arath ame: full=uncharacterized mitochondrial protein g00810 ame: full=orf240b	3.94131e-14	79	76.6406	53
all-unigene002210	621	gi|27151496	fbp24_pethy ame: full=mads-box protein fbp24 ame: full=floral-binding protein 24	1.22465e-19	72	71.633	65
all-unigene002209	974	gi|254777949	dnaj_cloce ame: full=chaperone protein	9.24421e-07	67	54.6842	56
all-unigene002211	343	gi|75335477	vcr_arath ame: full=varicose-related protein	2.04082e-26	64	117.472	124
all-unigene002212	423	gi|47117099	rl27_bovin ame: full=60s ribosomal protein l27	6.53648e-65	91	245.358	134
all-unigene002213	219	gi|68052840	phyll_tobac ame: full=phylloplanin ame: full=t-phylloplanin flags: precursor	1e-05	54	32.3426	51
all-unigene002216	415	gi|1710551	rl39_maize ame: full=60s ribosomal protein l39	5.45836e-24	98	109.383	51
all-unigene002217	237	gi|8920614	non-ltr retroelement reverse transcriptase	1.22109e-20	73	90.5077	78
all-unigene002218	227	gi|482551768	vacuolar sorting protein 39	5.78408e-14	94	75.485	36
all-unigene002219	788	gi|3219786	cyp1_bruma ame: full=peptidyl-prolyl cis-trans isomerase 1 short=ppiase 1 ame: full= -1 ame: full=cyclophilin ame: full=rotamase 1	1e-05	42	36.5798	112
all-unigene002221	369	gi|74761075	s26a8_human ame: full=testis anion transporter 1 ame: full=anion exchange transporter ame: full=solute carrier family 26 member 8	1e-05	58	37.3502	51
all-unigene002222	2728	gi|182702257	ycf1_nasof ame: full= membrane protein ycf1	0	95	644.04	342
all-unigene002223	552	gi|462417274	subtilisin-like protease	1.15308e-13	84	72.4034	46
all-unigene002224	755	gi|462417274	subtilisin-like protease	1.21384e-15	85	78.9518	49
all-unigene002226	220	gi|75149864	gsa_brana ame: full=glutamate-1-semialdehyde - chloroplastic short=gsa ame: full=glutamate-1-semialdehyde aminotransferase short=gsa-at flags: precursor	6.0466e-31	97	132.494	70
all-unigene002225	245	gi|482555815	enhancer of polycomb-like transcription factor protein	1.37124e-11	83	68.5514	56
all-unigene002227	758	gi|82582267	ssh1_human ame: full=protein phosphatase slingshot homolog 1 ame: full=ssh-like protein 1 short=ssh-1l short=hssh-1l	1e-05	70	35.8094	40
all-unigene002228	1701	gi|13635663	ru17_human ame: full=u1 small nuclear ribonucleoprotein 70 kda short=u1 snrnp 70 kda short=u1-70k short=snrnp70	1e-05	45	38.1206	88
all-unigene002229	457	gi|311033499	co6a3_human ame: full=collagen alpha-3 chain flags: precursor	3.22619e-16	100	83.9593	37
all-unigene002230	563	gi|482574895	hypothetical protein CARUB_v10011794mg	3.6983e-39	82	140.198	121
all-unigene002232	327	gi|11386956	nltp5_arath ame: full=non-specific lipid-transfer protein 5 short=ltp 5 flags: precursor	1.02458e-38	95	158.303	85
all-unigene002233	237	gi|5915832	c76c2_arath ame: full=cytochrome p450 76c2	1.62667e-23	76	107.842	78
all-unigene002234	439	gi|5915819	c75a6_camme ame: full=flavonoid 3 -hydroxylase short=f3 5 h ame: full=cytochrome p450 75a6	7.76432e-17	63	85.8853	91
all-unigene002235	345	gi|240256276	uncharacterized protein	1.76365e-13	92	72.7886	39
all-unigene002238	360	gi|18206245	def02_arath ame: full=defensin-like protein 2 ame: full=low-molecular-weight cysteine-rich protein 69 short=protein lcr69 ame: full=plant defensin flags: precursor	1.25923e-20	96	98.2117	51
all-unigene002239	301	gi|75273536	agp12_arath ame: full=arabinogalactan peptide 12 short=ag-peptide 12 flags: precursor	3.91331e-09	89	60.077	39
all-unigene002240	757	gi|61661521	protein trichome birefringence-like 26	9.69792e-110	97	334.339	196
all-unigene002241	344	gi|193806320	ycf2_oeneh ame: full=protein ycf2	1e-05	55	33.113	36
all-unigene002243	737	gi|11386956	nltp5_arath ame: full=non-specific lipid-transfer protein 5 short=ltp 5 flags: precursor	3.65607e-57	95	221.476	118
all-unigene002244	730	gi|22653808	lea5_citsi ame: full=late embryogenesis abundant protein lea5	1.75083e-11	52	69.707	102
all-unigene002245	1716	gi|75169720	pp116_arath ame: full=pentatricopeptide repeat-containing protein at1g71490	1.2086e-19	67	73.1738	77
all-unigene002250	240	gi|297842381	o-fucosyltransferase-like protein	7.09987e-13	94	72.0182	35
all-unigene002253	328	gi|73622119	akr2_arath ame: full=ankyrin repeat domain-containing protein 2 short= 2	7.3939e-13	95	72.4034	40
all-unigene002255	315	gi|75169477	agp21_arath ame: full=arabinogalactan peptide 21 short=ag-peptide 21 flags: precursor	1.08578e-11	90	68.5514	40
all-unigene002254	211	gi|482564803	chloroplast-targeted copper chaperone protein	8.0012e-15	68	74.7146	70
all-unigene002256	695	gi|62900024	dnaj_myxxa ame: full=chaperone protein	1e-05	51	42.743	62
all-unigene002257	249	gi|482555814	family transposase	2.9042e-27	84	90.1225	57
all-unigene002260	385	gi|461899	cp20c_arath ame: full=peptidyl-prolyl cis-trans isomerase cyp20- chloroplastic short=ppiase cyp20-3 ame: full=cyclophilin of 20 kda 3 ame: full=cyclosporin a-binding protein ame: full=rotamase cyp20-3 ame: full=rotamase cyclophilin-4 flags: precursor	1.7121e-17	75	87.8113	79
all-unigene002261	367	gi|46396677	rl352_arath ame: full=60s ribosomal protein l35-2	2.97277e-17	100	87.0409	43
all-unigene002263	582	gi|44888334	thn_brarp ame: full=thionin contains: ame: full=thionin contains: ame: full=acidic protein flags: precursor	1.49053e-19	52	95.9005	136
all-unigene002264	357	gi|44888334	thn_brarp ame: full=thionin contains: ame: full=thionin contains: ame: full=acidic protein flags: precursor	4.98063e-09	48	59.6918	103
all-unigene002265	258	gi|75102860	inva3_arath ame: full=acid beta-fructofuranosidase vacuolar short=at beta fruct3 short= 3 ame: full=acid invertase 3 short=ai 3 ame: full=acid sucrose hydrolase 3 ame: full=vacuolar invertase 3 short=inv-v3 short=vac-inv 3 short=vi 3 flags: precursor	2.54286e-29	79	127.102	93
all-unigene002267	407	gi|264675901	ypf14_plaf7 ame: full=uncharacterized protein pfb0315w	1e-05	46	38.1206	89
all-unigene002268	1614	gi|75274750	psbc_nepol ame: full=photosystem ii cp43 chlorophyll apoprotein ame: full=psii 43 kda protein ame: full=photosystem ii 44 kda reaction center protein ame: full=protein cp-43 ame: full=protein p6 flags: precursor	1e-05	42	37.7354	91
all-unigene002270	411	gi|223635327	mdn1_dicdi ame: full=midasin ame: full=midas-containing protein	1e-05	58	33.113	50
all-unigene002271	1058	gi|334302872	y5902_arath ame: full=uncharacterized protein at5g19025	1.8926e-16	49	87.0409	201
all-unigene002272	298	gi|82202372	actg_xentr ame: full= cytoplasmic 2 ame: full= type 5 ame: full=gamma-actin contains: ame: full= cytoplasmic n-terminally processed	8.0587e-52	100	201.83	99
all-unigene002273	412	gi|20532217	pks1_arath ame: full=protein phytochrome kinase substrate 1	7.94796e-07	62	52.373	58
all-unigene002275	425	gi|18206371	psbp1_arath ame: full=oxygen-evolving enhancer protein 2- chloroplastic short=oee2 ame: full=23 kda subunit of oxygen evolving system of photosystem ii ame: full=23 kda thylakoid membrane protein ame: full=oec 23 kda subunit short=oec23 flags: precursor	7.52011e-24	69	108.997	94
all-unigene002276	228	gi|75313342	mthr1_arath ame: full=methylenetetrahydrofolate reductase 1 short= 1	4.45353e-18	97	89.7373	44
all-unigene002277	223	gi|238479429	glycine-rich protein 23	1.70379e-14	86	73.1738	44
all-unigene002279	329	gi|75249591	idh5_arath ame: full=isocitrate dehydrogenase catalytic subunit mitochondrial ame: full=idh-v ame: full=isocitric dehydrogenase 5 ame: full=nad(+)-specific icdh 5 flags: precursor	6.03458e-23	80	105.916	78
all-unigene002283	290	gi|5915834	c76c4_arath ame: full=cytochrome p450 76c4	8.1761e-36	84	148.673	96
all-unigene002284	346	gi|115473	cahc_tobac ame: full=carbonic chloroplastic ame: full=carbonate dehydratase flags: precursor	6.35165e-12	71	69.3218	69
all-unigene002285	995	gi|115473	cahc_tobac ame: full=carbonic chloroplastic ame: full=carbonate dehydratase flags: precursor	1.39534e-82	78	306.605	241
all-unigene002286	434	gi|115473	cahc_tobac ame: full=carbonic chloroplastic ame: full=carbonate dehydratase flags: precursor	4.06201e-07	71	53.5286	49
all-unigene002287	356	gi|122278960	ftsx_strp2 ame: full=cell division protein	1e-05	51	36.1946	87
all-unigene002288	259	gi|73621224	rc3h2_mouse ame: full=ring finger and ccch-type zinc finger domain-containing protein 2 ame: full=membrane-associated nucleic acid-binding protein	1e-05	52	32.7278	48
all-unigene002289	369	gi|126296	lin1_nycco ame: full=line-1 reverse transcriptase homolog	7.72354e-50	88	195.282	123
all-unigene002290	359	gi|75170197	h2b10_arath ame: full=histone ame: full=htb2	2.89627e-25	100	113.62	58
all-unigene002291	1050	gi|297827031	uncharacterized loc101212292	2.39914e-37	54	142.124	220
all-unigene002292	906	gi|81881848	taf8_mouse ame: full=transcription initiation factor tfiid subunit 8 ame: full=protein taube nuss ame: full=tbp-associated factor 8	1e-05	43	35.4242	86
all-unigene002293	981	gi|297827031	uncharacterized loc101212292	5.22356e-43	60	156.377	197
all-unigene002294	1189	gi|297806893	vq motif-containing protein	2.18016e-66	84	219.55	178
all-unigene002295	368	gi|114834	bas1_yeast ame: full=myb-like dna-binding protein bas1	1e-05	45	35.039	84
all-unigene002296	1210	gi|75333556	srk2b_arath ame: full=serine threonine-protein kinase srk2b ame: full=ost1-kinase-like 6 ame: full=snf1-related kinase short=	1.38807e-13	67	77.7962	73
all-unigene002297	990	gi|75333556	srk2b_arath ame: full=serine threonine-protein kinase srk2b ame: full=ost1-kinase-like 6 ame: full=snf1-related kinase short=	1.56791e-09	64	63.929	62
all-unigene002302	615	gi|75315964	hs17b_arath ame: full= kda class i heat shock protein 2 ame: full= kda heat shock protein 2 short=	1.81829e-58	80	225.328	156
all-unigene002303	572	gi|74582853	yh5d_schpo ame: full=uncharacterized serine-rich protein flags: precursor	1e-05	43	49.6766	151
all-unigene002304	797	gi|75333522	pla17_arath ame: full=phospholipase a1- chloroplastic flags: precursor	2.18065e-106	79	385.185	256
all-unigene002306	448	gi|75337418	cxe13_arath ame: full=probable carboxylesterase 13 ame: full= 13	9.51675e-42	75	168.703	130
all-unigene002308	249	gi|81977721	b4_hhv6z ame: full=protein b4	1e-05	47	33.4982	57
all-unigene002310	378	gi|75273354	pp227_arath ame: full= pentatricopeptide repeat-containing protein mitochondrial flags: precursor	1.00159e-49	85	194.897	126
all-unigene002312	831	gi|138939	vns2_ahsv9 ame: full=non-structural protein ns2	1e-05	48	35.039	75
all-unigene002315	502	gi|1346758	pp14_arath ame: full=serine threonine-protein phosphatase pp1 isozyme 4	1.7005e-25	100	115.161	56
all-unigene002316	275	gi|313471423	pum12_arath ame: full=pumilio homolog 12 short=apum-12 short= 12	1.05602e-14	65	78.5666	92
all-unigene002317	1141	gi|160332302	ypja_ecoli ame: full=uncharacterized outer membrane protein flags: precursor	1e-05	38	35.8094	102
all-unigene002321	297	gi|334302851	rlp12_arath ame: full=receptor-like protein 12 short= 12 flags: precursor	5.09469e-22	71	102.834	89
all-unigene002322	215	gi|75220394	prot1_arath ame: full=proline transporter 1 short= 1	4.52208e-18	95	89.7373	49
all-unigene002325	549	gi|125991830	cyt4_arath ame: full=cysteine proteinase inhibitor 4 short= -4 flags: precursor	2.54664e-31	84	134.806	91
all-unigene002326	256	gi|75313130	arae1_arath ame: full=udp-arabinose 4-epimerase 1 ame: full=udp-d-xylose 4-epimerase 1	1.07083e-19	95	95.1301	49
all-unigene002327	233	gi|82081173	bud13_chick ame: full=bud13 homolog	1e-05	47	33.113	78
all-unigene002328	475	gi|156632597	narg2_mouse ame: full=nmda receptor-regulated protein 2	1e-05	40	32.7278	85
all-unigene002332	548	gi|75303266	bre1a_arath ame: full=e3 ubiquitin-protein ligase bre1-like 1 short= 1 ame: full=protein histone monoubiquitination 1 short= 1	5.98229e-60	87	142.895	88
all-unigene002331	410	gi|75262588	crf3_arath ame: full=ethylene-responsive transcription factor crf3 ame: full=protein cytokinin response factor 3	5.30154e-35	66	145.976	140
all-unigene002333	1091	gi|41018257	stip_soybn ame: full=heat shock protein sti short= ame: full=stress-inducible protein	5.39631e-14	51	78.9518	127
all-unigene002334	307	gi|6137319	zpr1_mouse ame: full=zinc finger protein zpr1 ame: full=zinc finger protein 259	1.33613e-09	65	61.6178	55
all-unigene002338	768	gi|75247616	fbx14_arath ame: full=f-box protein fbx14 ame: full=transport inhibitor response 1-like protein short=tir1-like protein	6.32644e-31	90	134.42	76
all-unigene002339	576	gi|227438203	ribonuclease h-like protein	3.68953e-39	58	153.295	187
all-unigene002341	307	gi|76803811	pal1_arath ame: full=phenylalanine ammonia-lyase 1	4.16725e-11	71	66.6254	56
all-unigene002343	736	gi|75154211	csplg_arath ame: full=casp-like protein at3g23200	1.81028e-64	86	245.743	151
all-unigene002346	534	gi|226693517	cxg1_human ame: full=gap junction gamma-1 protein ame: full=connexin-45 short=cx45 ame: full=gap junction alpha-7 protein	1e-05	43	35.039	81
all-unigene002347	493	gi|75163815	wsd1_arath ame: full=o-acyltransferase wsd1 ame: full=diacylglycerol o-acyltransferase short=dgat ame: full=long-chain-alcohol o-fatty-acyltransferase ame: full=wax synthase short=ws	5.07585e-40	70	163.31	157
all-unigene002348	462	gi|75163815	wsd1_arath ame: full=o-acyltransferase wsd1 ame: full=diacylglycerol o-acyltransferase short=dgat ame: full=long-chain-alcohol o-fatty-acyltransferase ame: full=wax synthase short=ws	1.61226e-26	84	118.242	79
all-unigene002349	1138	gi|75311523	c82g1_arath ame: full=cytochrome p450 82g1	3.13813e-145	85	514.998	332
all-unigene002350	257	gi|75311523	c82g1_arath ame: full=cytochrome p450 82g1	7.94146e-15	95	78.9518	40
all-unigene002352	311	gi|75099732	fpg_arath ame: full=formamidopyrimidine-dna glycosylase short=fapy-dna glycosylase ame: full=dna-(apurinic or apyrimidinic site) lyase fpg1 ame: full=formamidopyrimidine-dna glycosylase 1 short= -1 ame: full=formamidopyrimidine-dna glycosylase 2 short= -2 ame: full=protein homolog 1 short= -1 ame: full=protein homolog 2 short= -2	1e-05	70	38.891	37
all-unigene002354	303	gi|118872	dpol_hbvcp ame: full=protein p includes: ame: full=dna-directed dna polymerase includes: ame: full=rna-directed dna polymerase includes: ame: full=ribonuclease h	1e-05	50	32.7278	73
all-unigene002358	1105	gi|114443	atp6_human ame: full=atp synthase subunit a ame: full=f-atpase protein 6	4.13165e-70	69	265.388	226
all-unigene002359	452	gi|218511839	ssn2_debha ame: full=mediator of rna polymerase ii transcription subunit 13 ame: full=mediator complex subunit 13	1e-05	66	33.4982	39
all-unigene002361	402	gi|251764526	adda_helmi ame: full=atp-dependent helicase nuclease subunit a ame: full=atp-dependent helicase nuclease	1e-05	58	33.8834	50
all-unigene002363	365	gi|266762	pgs1_human ame: full=biglycan ame: full=bone cartilage proteoglycan i ame: full=pg-s1 flags: precursor	2.49057e-64	100	243.432	121
all-unigene002364	481	gi|60392921	pol2_mouse ame: full=retrovirus-related pol polyprotein line-1 ame: full=long interspersed element-1 short=l1 includes: ame: full=reverse transcriptase includes: ame: full=endonuclease	6.80347e-66	84	249.21	159
all-unigene002365	254	gi|75273478	pp243_arath ame: full=pentatricopeptide repeat-containing protein at3g18970	1.492e-37	92	154.451	84
all-unigene002367	248	gi|75273932	pub29_arath ame: full=u-box domain-containing protein 29 ame: full=plant u-box protein 29	3.59851e-15	68	80.1073	88
all-unigene002369	542	gi|75337836	nfxl1_arath ame: full=nf-x1-type zinc finger protein nfxl1 short= 1	1e-05	45	34.2686	74
all-unigene002370	305	gi|482558212	p-loop containing nucleoside triphosphate hydrolases superfamily protein	2.5625e-37	88	139.428	92
all-unigene002372	216	gi|209954711	UDP-glucose:glucosyltransferase	1e-05	73	50.0618	38
all-unigene002373	664	gi|297838571	ubiquitin-related protein	4.06288e-16	70	82.8037	91
all-unigene002374	841	gi|297838571	ubiquitin-related protein	7.85522e-16	70	82.8037	91
all-unigene002375	631	gi|74582853	yh5d_schpo ame: full=uncharacterized serine-rich protein flags: precursor	1e-05	50	35.039	117
all-unigene002376	219	gi|97180274	ab30g_arath ame: full=abc transporter g family member 30 short=abc transporter short= 30 ame: full=pleiotropic drug resistance protein 2	2.16215e-20	96	97.4413	52
all-unigene002378	394	gi|313471383	lacs7_arath ame: full=long chain acyl- synthetase peroxisomal	6.52423e-73	99	271.937	131
all-unigene002379	340	gi|186491866	kinesin-like protein	1.30631e-39	83	149.058	95
all-unigene002381	229	gi|391358189	h3c_mouse ame: full=histone ame: full=embryonic	5.24861e-27	100	119.398	60
all-unigene002383	240	gi|75267517	maop3_arath ame: full=nadp-dependent malic enzyme 3 short= -me3 short=nadp-malic enzyme 3	4.6964e-39	97	159.458	80
all-unigene002384	317	gi|297800270	hypothetical protein ARALYDRAFT_914894	1.41987e-07	74	57.3806	51
all-unigene002387	380	gi|24638008	lima_rhoer ame: full=limonene- -epoxide hydrolase	1e-05	57	33.8834	47
all-unigene002386	423	gi|75533347	paa_strcg ame: full=probable cell-surface antigen i ii flags: precursor	1e-05	55	35.4242	49
all-unigene002390	354	gi|130582	polx_tobac ame: full=retrovirus-related pol polyprotein from transposon tnt 1-94 includes: ame: full=protease includes: ame: full=reverse transcriptase includes: ame: full=endonuclease	6.04619e-31	73	132.494	115
all-unigene002392	784	gi|23396819	aco13_mouse ame: full=acyl-coenzyme a thioesterase 13 short=acyl- thioesterase 13 ame: full=thioesterase superfamily member 2	1e-05	50	50.447	110
all-unigene002393	348	gi|75100697	y4117_arath ame: full= disease resistance protein at4g11170	9.99754e-14	73	61.2326	64
all-unigene002397	333	gi|75333659	crk2_arath ame: full=cysteine-rich receptor-like protein kinase 2 short=cysteine-rich rlk2 flags: precursor	1.93019e-29	67	127.487	102
all-unigene002398	395	gi|68056748	ldha_pantr ame: full=l-lactate dehydrogenase a chain short=ldh-a ame: full=ldh muscle subunit short=ldh-m	4.37621e-69	99	259.225	131
all-unigene002401	249	gi|357435991	hypothetical protein MTR_1g005120	1.90869e-21	100	88.9669	45
all-unigene002404	291	gi|140550	ycf2_marpo ame: full=protein ycf2	1e-05	63	33.113	47
all-unigene002406	227	gi|75264101	psd11_arath ame: full=26s proteasome non-atpase regulatory subunit 11 ame: full=19s proteosome subunit 9 ame: full=26s proteasome regulatory subunit n6 ame: full=26s proteasome regulatory subunit rpn6a ame: full=26s proteasome regulatory subunit s9 short= 9	4.17152e-24	76	109.768	75
all-unigene002405	742	gi|75317773	y4200_arath ame: full=uncharacterized protein at4g02000	5.61138e-13	47	74.7146	135
all-unigene002409	375	gi|3334219	hppd_dauca ame: full=4-hydroxyphenylpyruvate dioxygenase ame: full=4-hydroxyphenylpyruvic acid oxidase short=4hppd short=hpd short=hppdase	1e-05	40	33.4982	91
all-unigene002410	278	gi|75273882	aspg1_arath ame: full=protein aspartic protease in guard cell 1 short= 1 flags: precursor	3.47182e-42	92	169.859	92
all-unigene002411	241	gi|11133276	gstz1_arath ame: full=glutathione s-transferase z1 short= 1 ame: full=gst class-zeta member 1 ame: full=glutathione s-transferase 18 ame: full=maleylacetone isomerase short=mai	6.56851e-33	90	139.043	80
all-unigene002412	223	gi|229891485	pme3_arath ame: full=pectinesterase pectinesterase inhibitor 3 includes: ame: full=pectinesterase inhibitor 3 ame: full=pectin methylesterase inhibitor 3 includes: ame: full=pectinesterase 3 short=pe 3 ame: full=pectin methylesterase 27 short= 27 ame: full=pectin methylesterase 3 flags: precursor	2.3705e-27	90	120.553	74
all-unigene002413	555	gi|189027644	alkb8_xentr ame: full=alkylated dna repair protein alkb homolog 8 ame: full=probable alpha-ketoglutarate-dependent dioxygenase abh8 ame: full=s-adenosyl-l-methionine-dependent trna methyltransferase abh8 ame: full=trna (carboxymethyluridine -5-o)-methyltransferase abh8	1.46248e-34	69	145.591	133
all-unigene002415	866	gi|12229670	hma5_arath ame: full= copper-transporting atpase hma5 ame: full=protein heavy metal atpase 5 ame: full= copper-transporting atpase 3	2.81044e-150	97	531.176	288
all-unigene002417	1103	gi|75326880	ab42g_arath ame: full=abc transporter g family member 42 short=abc transporter short= 42 ame: full=probable pleiotropic drug resistance protein 14	7.59568e-157	89	553.518	328
all-unigene002418	301	gi|125535446	uncharacterized loc101221954	1e-05	78	48.1358	37
all-unigene002419	627	gi|482565947	cysteine histidine-rich c1 domain-containing protein	1.50499e-10	80	68.9366	45
all-unigene002421	249	gi|122209128	ppd_rapsa ame: full=pheophorbidase short=	8.23841e-36	90	148.673	82
all-unigene002422	740	gi|75180383	pp445_arath ame: full=pentatricopeptide repeat-containing protein at5g65560	8.07488e-113	89	406.371	244
all-unigene002425	321	gi|75321844	y5576_arath ame: full=probable receptor-like serine threonine-protein kinase at5g57670	1e-05	70	34.6538	41
all-unigene002426	254	gi|482569661	serine protease aprx	3.5734e-39	93	147.132	83
all-unigene002428	423	gi|334302885	pmi15_arath ame: full=protein plastid movement impaired 15	2.19625e-28	64	124.02	122
all-unigene002431	869	gi|297830100	af380658_1 at1g53031	1.76762e-91	97	278.87	144
all-unigene002432	952	gi|297830100	af380658_1 at1g53031	4.19829e-91	97	279.256	144
all-unigene002433	329	gi|119628869	isoform cra_b	4.77264e-56	100	181.415	89
all-unigene002434	933	gi|122064956	ring2_arath ame: full=e3 ubiquitin-protein ligase at1g63170 ame: full=ring finger protein at1g63170	1.6787e-58	64	226.483	220
all-unigene002435	1025	gi|122064956	ring2_arath ame: full=e3 ubiquitin-protein ligase at1g63170 ame: full=ring finger protein at1g63170	1.92084e-58	64	226.483	220
all-unigene002436	936	gi|75170504	fla20_arath ame: full= fasciclin-like arabinogalactan protein 20	1e-05	70	50.0618	41
all-unigene002437	258	gi|21431812	polg_smsv1 ame: full=genome polyprotein contains: ame: full=protein p16 contains: ame: full=protein p32 contains: ame: full=ntpase ame: full=p39 contains: ame: full=protein p30 contains: ame: full=viral genome-linked protein ame: full=vpg ame: full=p13 contains: ame: full=protease-polymerase p76 short=pro-pol	1e-05	55	32.3426	40
all-unigene002441	1095	gi|25091401	tlp1_pyrpy ame: full=thaumatin-like protein 1 flags: precursor	1.08356e-54	59	214.157	247
all-unigene002443	365	gi|74761006	zfp3_human ame: full=zinc finger protein 3 homolog short=zfp-3 ame: full=zinc finger protein 752	1e-05	53	43.5134	77
all-unigene002444	413	gi|61211285	a4_pantr ame: full=amyloid beta a4 protein ame: full=abpp short=app ame: full=alzheimer disease amyloid a4 protein homolog contains: ame: full=n-app contains: ame: full=soluble app-alpha short=s-app-alpha contains: ame: full=soluble app-beta short=s-app-beta contains: ame: full=c99 contains: ame: full=beta-amyloid protein 42 ame: full=beta-app42 contains: ame: full=beta-amyloid protein 40 ame: fu…	5.29423e-27	78	119.398	78
all-unigene002446	410	gi|75042618	bcd1_ponab ame: full=box c d snorna protein 1 ame: full=zinc finger hit domain-containing protein 6	8.82007e-06	53	48.9062	62
all-unigene002453	319	gi|113950	anxa2_human ame: full=annexin a2 ame: full=annexin ii ame: full=annexin-2 ame: full=calpactin i heavy chain ame: full=calpactin-1 heavy chain ame: full=chromobindin-8 ame: full=lipocortin ii ame: full=placental anticoagulant protein iv short=pap-iv ame: full=protein i ame: full=p36	2.07581e-55	99	213.772	106
all-unigene002447	255	gi|56748734	cnbl5_arath ame: full=calcineurin b-like protein 5 ame: full=sos3-like calcium-binding protein 4	3.34705e-13	81	73.559	49
all-unigene002448	358	gi|110816408	rl30_wheat ame: full=60s ribosomal protein l30	1.05985e-51	98	201.445	100
all-unigene002450	328	gi|3319372	rna-directed dna polymerase (reverse transcriptase)-related family protein	5.63595e-24	63	105.916	105
all-unigene002451	220	gi|8885606	retroelement pol poly	1e-05	71	45.4394	35
all-unigene002454	419	gi|82061579	polg_pvcv1 ame: full=genome polyprotein contains: ame: full=movement protein short=mp contains: ame: full=capsid protein short=cp contains: ame: full=aspartic protease short=pr contains: ame: full=reverse transcriptase short=rt	3.28648e-32	64	136.732	139
all-unigene002456	298	gi|334302825	irt1_arath ame: full=fe(2+) transport protein 1 ame: full=fe transport protein 1 ame: full=iron-regulated transporter 1 flags: precursor	3.0803e-25	81	72.7886	49
all-unigene002458	391	gi|482554680	hypothetical protein CARUB_v10007496mg	3.72929e-18	85	65.855	42
all-unigene002459	650	gi|75317773	y4200_arath ame: full=uncharacterized protein at4g02000	3.9993e-14	46	78.1814	167
all-unigene002462	298	gi|482574040	af428444_1 at1g01240 f6f3_11	9.10473e-24	84	101.293	93
all-unigene002467	450	gi|75171405	y5694_arath ame: full=probably inactive leucine-rich repeat receptor-like protein kinase at5g06940 flags: precursor	1e-05	64	40.4318	39
all-unigene002468	365	gi|75171405	y5694_arath ame: full=probably inactive leucine-rich repeat receptor-like protein kinase at5g06940 flags: precursor	1e-05	64	40.4318	39
all-unigene002469	249	gi|18424024	uncharacterized protein	4.71758e-13	90	67.781	55
all-unigene002472	379	gi|75313135	hsp7q_arath ame: full=heat shock 70 kda protein 16 ame: full=heat shock protein 70-16 short= sp70-16	2.83221e-20	71	97.0561	78
all-unigene002473	337	gi|15214341	y4837_arath ame: full=kh domain-containing protein at4g18375	1.98784e-37	84	154.066	112
all-unigene002475	325	gi|259511408	srrt_drovi ame: full=serrate rna effector molecule homolog ame: full=arsenite-resistance protein 2 homolog	1e-05	52	33.113	61
all-unigene002476	294	gi|18421151	heparan-alpha-glucosaminide n-acetyltransferase-like	2.95175e-54	95	185.652	97
all-unigene002477	348	gi|730456	rs19_orysj ame: full=40s ribosomal protein s19	1.11598e-24	98	111.694	56
all-unigene002479	367	gi|122215262	pp128_arath ame: full=pentatricopeptide repeat-containing protein at1g77170	1.68804e-12	61	71.2478	78
all-unigene002480	410	gi|109891947	co1a1_bovin ame: full=collagen alpha-1 chain ame: full=alpha-1 type i collagen flags: precursor	4.48802e-34	64	142.895	114
all-unigene002482	292	gi|75334096	pskr2_arath ame: full=phytosulfokine receptor 2 short= 2 ame: full=phytosulfokine lrr receptor kinase 2 flags: precursor	6.72881e-06	73	49.2914	42
all-unigene002484	456	gi|75317777	stp7_arath ame: full=sugar transport protein 7 ame: full=hexose transporter 7	8.0908e-68	98	255.373	131
all-unigene002483	448	gi|112684	1433a_horvu ame: full=14-3-3-like protein a short=14-3-3a	1.8292e-21	70	72.0182	68
all-unigene002485	304	gi|75223237	pmtg_arath ame: full=probable methyltransferase pmt16	1.02405e-17	81	88.5817	59
all-unigene002486	470	gi|75333997	c3h59_arath ame: full=zinc finger ccch domain-containing protein 59 short= 3h59 ame: full=zinc finger ccch domain and wd40 repeat-containing protein 3	4.12461e-25	67	113.62	108
all-unigene002487	1299	gi|82055772	polg_pvcv2 ame: full=genome polyprotein contains: ame: full=movement protein short=mp contains: ame: full=capsid protein short=cp contains: ame: full=aspartic protease short=pr contains: ame: full=reverse transcriptase short=rt	6.03934e-87	56	321.627	450
all-unigene002490	509	gi|123908106	stpap_danre ame: full=speckle targeted pip5k1a-regulated poly polymerase short=star-pap ame: full=rna-binding motif protein 21 short=rna-binding protein 21 ame: full=u6 snrna-specific terminal uridylyltransferase 1 short=u6-tutase	1e-05	42	33.4982	73
all-unigene002491	371	gi|115502214	glpq3_arath ame: full=probable glycerophosphoryl diester phosphodiesterase 3 flags: precursor	8.46421e-41	91	105.531	62
all-unigene002492	578	gi|122168346	g11a_orysj ame: full=protein kinase g11a	3.13356e-62	74	237.654	189
all-unigene002495	416	gi|116256117	wak3_arath ame: full=wall-associated receptor kinase 3 flags: precursor	1.75997e-14	77	77.7962	59
all-unigene002497	280	gi|89257596	ulp1 protease family protein	1.19811e-32	89	128.257	84
all-unigene002499	395	gi|75330977	div_antma ame: full=transcription factor divaricata	6.86202e-14	74	75.8702	66
all-unigene002500	242	gi|142989615	fbd40_arath ame: full=fbd-associated f-box protein at4g10400	4.41614e-21	80	99.7525	76
all-unigene002502	267	gi|81883515	tm39a_rat ame: full=transmembrane protein 39a	1e-05	57	32.3426	47
all-unigene002503	481	gi|75169799	bpc3_arath ame: full=protein basic pentacysteine3 short= 3	1.18649e-38	69	158.688	143
all-unigene002504	421	gi|14286045	ycxc_astlo ame: full=uncharacterized kda protein in rps4-rps11 intergenic region ame: full=orf426	1e-05	41	45.0542	114
all-unigene002507	202	gi|28380167	syp42_arath ame: full=syntaxin-42 short= 42 short= 2b	2.19503e-20	91	97.4413	56
all-unigene002506	228	gi|45477035	m710_arath ame: full=uncharacterized mitochondrial protein g00710 ame: full=orf120	6.03765e-15	73	79.337	67
all-unigene002509	321	gi|212276830	m3k7_rat ame: full=mitogen-activated protein kinase kinase kinase 7	1e-05	49	43.5134	102
all-unigene002513	565	gi|297788253	kinesin motor family protein	3.71641e-09	64	59.3066	53
all-unigene002515	284	gi|6014904	dag_antma ame: full=dag chloroplastic flags: precursor	2.84155e-20	66	97.0561	95
all-unigene002517	349	gi|338817922	y8236_dicdi ame: full=tpr-containing protein ddb_g0280363	1e-05	42	34.6538	88
all-unigene002520	240	gi|466050	pcp5_caeel ame: full=prolyl carboxy peptidase like protein 5 flags: precursor	7.79521e-18	72	88.9669	87
all-unigene002521	398	gi|75337685	y4318_arath ame: full=uncharacterized protein at4g30180	2.42051e-27	84	120.553	83
all-unigene002525	257	gi|75164335	nfya9_arath ame: full=nuclear transcription factor y subunit a-9 short= -ya-9	1e-05	36	45.8246	117
all-unigene002526	279	gi|119368340	harb1_bovin ame: full= nuclease harbi1 ame: full=harbinger transposase-derived nuclease	1e-05	49	33.4982	79
all-unigene002537	221	gi|88941982	saps3_human ame: full=serine threonine-protein phosphatase 6 regulatory subunit 3 ame: full=saps domain family member 3 ame: full=sporulation-induced transcript 4-associated protein sapl	7.1925e-08	61	55.8398	68
all-unigene002528	250	gi|75334954	y5158_arath ame: full=probable receptor-like protein kinase at5g15080	1e-05	61	46.9802	54
all-unigene002529	331	gi|334302870	y5140_arath ame: full= inactive serine threonine-protein kinase at5g11400 flags: precursor	4.32467e-21	63	99.7525	102
all-unigene002530	225	gi|334302870	y5140_arath ame: full= inactive serine threonine-protein kinase at5g11400 flags: precursor	2.01608e-10	73	64.3142	49
all-unigene002527	340	gi|20137460	14312_arath ame: full=14-3-3-like protein gf14 iota ame: full=general regulatory factor 12	3.26185e-32	98	136.732	74
all-unigene002531	679	gi|75248477	ef105_arath ame: full=ethylene-responsive transcription factor erf105	9.70923e-75	91	279.641	167
all-unigene002532	615	gi|75338543	ab21i_arath ame: full=abc transporter i family member 21 short=abc transporter short= 21 ame: full=gcn-related protein 1 ame: full=non-intrinsic abc protein 2	1.76116e-53	80	208.764	138
all-unigene002533	220	gi|74674291	nst1_aspfu ame: full=stress response protein nst1	1e-05	53	32.3426	52
all-unigene002534	289	gi|62901052	rhm3_arath ame: full=probable rhamnose biosynthetic enzyme 3	9.94835e-50	98	194.897	96
all-unigene002536	455	gi|6623973	transposable element	7.33804e-24	69	70.0922	65
all-unigene002538	261	gi|226712603	rl35_acif2 ame: full=50s ribosomal protein l35	1e-05	52	32.7278	53
all-unigene002540	487	gi|89274220	hypothetical protein 23.t00036	1e-05	84	52.7582	38
all-unigene002542	322	gi|4335720	non-ltr retroelement reverse transcriptase	1e-05	53	51.6026	107
all-unigene002543	322	gi|549614	uip5_yeast ame: full=protein uip5 ame: full=ulp1-interacting protein 5 flags: precursor	1e-05	49	33.4982	73
all-unigene002544	529	gi|482548032	protein	1.3823e-28	83	86.2705	60
all-unigene002546	343	gi|75178969	ppr39_arath ame: full=pentatricopeptide repeat-containing protein mitochondrial flags: precursor	3.17404e-11	69	67.0106	73
all-unigene002550	252	gi|338819811	y5738_arath ame: full=btb poz domain-containing protein at5g67385	3.35758e-13	93	73.559	43
all-unigene002551	357	gi|74716283	muc16_human ame: full=mucin-16 short=muc-16 ame: full=ovarian cancer-related tumor marker ca125 short=ca-125 ame: full=ovarian carcinoma antigen ca125	1e-05	43	35.4242	60
all-unigene002553	877	gi|193806402	ppr15_arath ame: full=pentatricopeptide repeat-containing protein at1g06145 ame: full=protein embryo defective 1444	1.14938e-90	90	333.183	200
all-unigene002556	459	gi|264664528	y5169_arath ame: full=probable lrr receptor-like serine threonine-protein kinase at5g16900 flags: precursor	2.58894e-45	88	180.644	107
all-unigene002558	644	gi|75248497	zdh24_arath ame: full=probable s-acyltransferase at5g50020 ame: full=probable palmitoyltransferase at5g50020 ame: full=zinc finger dhhc domain-containing protein at5g50020	5.41014e-56	83	217.238	149
all-unigene002559	338	gi|2496086	y630_metja ame: full= phosphate permease mj0630	1e-05	49	35.039	89
all-unigene002560	218	gi|20138463	hy5_arath ame: full=transcription factor hy5 ame: full=protein long hypocotyl 5 ame: full=bzip transcription factor 56 short= 56	1e-05	57	41.5874	42
all-unigene002561	242	gi|482559174	hypothetical protein CARUB_v10019578mg, partial	1.52928e-22	76	99.3673	77
all-unigene002562	698	gi|29839627	wrk16_arath ame: full=probable wrky transcription factor 16 ame: full=wrky dna-binding protein 16	1e-05	45	48.1358	187
all-unigene002563	752	gi|75097884	snc1_arath ame: full=protein suppressor of npr1- constitutive 1 short= 1 ame: full=disease resistance rpp5-like protein	1e-05	50	47.7506	130
all-unigene002564	228	gi|317373419	mmp14_human ame: full=matrix metalloproteinase-14 short=mmp-14 ame: full=mmp-x1 ame: full=membrane-type matrix metalloproteinase 1 short=mt-mmp 1 short=mtmmp1 ame: full=membrane-type-1 matrix metalloproteinase short=mt1-mmp short=mt1mmp flags: precursor	5.42296e-40	100	162.54	74
all-unigene002565	382	gi|75070555	hs90b_ponab ame: full=heat shock protein hsp 90-beta	8.24047e-20	74	95.5153	67
all-unigene002567	207	gi|482548867	nucleic acid binding protein	2.55831e-15	69	78.5666	72
all-unigene002568	209	gi|294958217	pks3_arath ame: full=protein phytochrome kinase substrate 3	8.5601e-25	89	112.079	69
all-unigene002569	376	gi|45477041	m810_arath ame: full=uncharacterized mitochondrial protein g00810 ame: full=orf240b	1.61397e-15	59	81.2629	123
all-unigene002572	314	gi|118585329	retol_arath ame: full=reticuline oxidase-like protein flags: precursor	9.10682e-43	91	171.785	100
all-unigene002574	378	gi|74842664	ypf01_plaf7 ame: full=uncharacterized protein pf13_0277	1e-05	58	34.2686	39
all-unigene002576	368	gi|240255391	uncharacterized protein	1.67519e-08	75	56.6102	52
all-unigene002577	274	gi|82000432	yr878_mimiv ame: full= -n domain-containing protein r878	1e-05	57	32.3426	40
all-unigene002578	399	gi|136125	tra1_maize ame: full= ac transposase ame: full=orfa	2.77217e-07	74	53.9138	51
all-unigene002579	606	gi|166230613	syl_braso ame: full=leucine--trna ligase ame: full=leucyl-trna synthetase short=	1e-05	43	34.6538	99
all-unigene002581	219	gi|75309222	c86b1_arath ame: full=cytochrome p450 86b1	5.5239e-08	81	56.225	37
all-unigene002583	336	gi|334302851	rlp12_arath ame: full=receptor-like protein 12 short= 12 flags: precursor	2.14362e-07	46	54.299	143
all-unigene002586	441	gi|75072500	hs90a_bovin ame: full=heat shock protein hsp 90-alpha	5.65228e-76	99	282.337	146
all-unigene002587	435	gi|130582	polx_tobac ame: full=retrovirus-related pol polyprotein from transposon tnt 1-94 includes: ame: full=protease includes: ame: full=reverse transcriptase includes: ame: full=endonuclease	1e-05	40	35.039	144
all-unigene002589	235	gi|17065294	transcription factor iia large subunit	2.07483e-26	87	105.916	86
all-unigene002588	283	gi|125987635	rnhx1_arath ame: full= ribonuclease h protein at1g65750	1e-05	54	41.9726	61
all-unigene002590	420	gi|264664489	y3475_arath ame: full=probable lrr receptor-like serine threonine-protein kinase at3g47570 flags: precursor	4.69523e-55	83	212.616	143
all-unigene002591	423	gi|264664489	y3475_arath ame: full=probable lrr receptor-like serine threonine-protein kinase at3g47570 flags: precursor	1.49778e-64	90	244.202	144
all-unigene002592	529	gi|229488102	atxr3_arath ame: full=probable histone-lysine n-methyltransferase atxr3 ame: full=protein set domain group 2 ame: full=trithorax-related protein 3 short=trx-related protein 3	3.9559e-71	78	266.929	192
all-unigene002593	330	gi|123659610	y2139_stahj ame: full=uncharacterized protein sh2139	1e-05	46	33.8834	94
all-unigene002595	1502	gi|89257639	hypothetical protein 31.t00044	2.41472e-25	84	110.923	69
all-unigene002597	309	gi|75248497	zdh24_arath ame: full=probable s-acyltransferase at5g50020 ame: full=probable palmitoyltransferase at5g50020 ame: full=zinc finger dhhc domain-containing protein at5g50020	4.26839e-32	68	136.346	102
all-unigene002598	224	gi|22331043	nol1 nop2 sun family protein antitermination domain-containing protein	1.36547e-26	90	109.768	62
all-unigene002599	498	gi|130836	prp33_dauca ame: full=proline-rich 33 kda extensin-related protein flags: precursor	1e-05	53	40.0466	43
all-unigene002600	472	gi|482549154	envelope-like protein	2.84053e-23	60	103.219	153
all-unigene002601	214	gi|74750399	cn165_human ame: full= uncharacterized protein encoded by linc00596	1.23808e-07	63	55.0694	44
all-unigene002603	601	gi|122064902	perq2_danre ame: full=perq amino acid-rich with gyf domain-containing protein 2 ame: full=trinucleotide repeat-containing gene 15 protein	1e-05	43	36.5798	92
all-unigene002604	259	gi|226697526	gdl91_arath ame: full=gdsl esterase lipase at1g28640 ame: full=extracellular lipase at1g28640 flags: precursor	1.03152e-22	82	105.145	70
all-unigene002605	237	gi|46396675	rps5_arath ame: full=disease resistance protein rps5 ame: full=resistance to pseudomonas syringae protein 5 ame: full=pnd3 pnd10	2.35437e-14	82	77.411	56
all-unigene002608	421	gi|75206301	pp187_arath ame: full=pentatricopeptide repeat-containing protein at2g36240	5.6189e-24	90	109.383	62
all-unigene002610	323	gi|75264505	erf43_arath ame: full=ethylene-responsive transcription factor erf043	2.31405e-14	82	77.411	64
all-unigene002611	262	gi|474396577	r40g3 protein	1.55899e-40	89	146.747	78
all-unigene002614	650	gi|75274971	ndr1_arath ame: full=protein ndr1 ame: full=non-race specific disease resistance protein 1 short= 1 flags: precursor	1.42243e-11	45	69.707	179
all-unigene002616	211	gi|20260244	denn (aex-3) domain-containing protein	1.08687e-34	92	131.339	70
all-unigene002617	299	gi|482563750	hypothetical protein CARUB_v10024110mg	1.20787e-15	95	77.411	69
all-unigene002618	448	gi|4056484	hypothetical protein	5.59061e-08	75	56.6102	53
all-unigene002620	976	gi|141475	ytx2_xenla ame: full=transposon tx1 uncharacterized 149 kda protein ame: full=orf 2	3.07792e-18	45	92.8189	324
all-unigene002622	226	gi|125568	kpk1_phavu ame: full=protein kinase pvpk-1	2.9023e-09	57	60.4622	75
all-unigene002627	316	gi|264664459	y1743_arath ame: full=probable lrr receptor-like serine threonine-protein kinase at1g74360 flags: precursor	2.55194e-45	91	180.259	104
all-unigene002624	363	gi|24418488	lea1_cicar ame: full=late embryogenesis abundant protein 1 ame: full= -1	1e-05	49	33.113	77
all-unigene002625	242	gi|75246109	pp332_arath ame: full=pentatricopeptide repeat-containing protein at4g21190 ame: full=protein embryo defective 1417	7.81331e-10	58	62.3882	82
all-unigene002626	229	gi|75327654	nrx12_orysj ame: full=probable nucleoredoxin 1-2 short= rx1-2	1e-05	50	36.5798	51
all-unigene002628	279	gi|74853037	mlh1_dicdi ame: full=dna mismatch repair protein mlh1 ame: full= protein homolog 1	1e-05	56	33.4982	37
all-unigene002630	350	gi|109940157	rs20_orysj ame: full=40s ribosomal protein s20	1.76733e-38	97	157.532	82
all-unigene002632	418	gi|75274240	pp249_arath ame: full=pentatricopeptide repeat-containing protein at3g22690	1.46161e-64	90	244.202	142
all-unigene002633	518	gi|13124684	copia_drome ame: full=copia protein ame: full=gag-int-pol protein contains: ame: full=copia vlp protein contains: ame: full=copia protease	3.66181e-10	66	64.3142	59
all-unigene002635	353	gi|11135450	tonb_helpj ame: full=protein	1e-05	55	33.113	45
all-unigene002637	325	gi|6094290	gemi2_xenla ame: full=gem-associated protein 2 short=gemin-2 ame: full=component of gems 2 ame: full=survival of motor neuron protein-interacting protein 1 short=smn-interacting protein 1	1e-05	51	41.9726	95
all-unigene002636	463	gi|109891947	co1a1_bovin ame: full=collagen alpha-1 chain ame: full=alpha-1 type i collagen flags: precursor	1.36607e-09	32	62.003	154
all-unigene002638	541	gi|46577339	tmvrn_nicgu ame: full=tmv resistance protein n	7.7468e-25	57	113.235	177
all-unigene002640	207	gi|75309247	lox4_arath ame: full=lipoxygenase chloroplastic short= 4 ame: full=lox3-like protein flags: precursor	4.56321e-18	90	89.7373	53
all-unigene002642	268	gi|130582	polx_tobac ame: full=retrovirus-related pol polyprotein from transposon tnt 1-94 includes: ame: full=protease includes: ame: full=reverse transcriptase includes: ame: full=endonuclease	5.62236e-24	75	109.383	89
all-unigene002643	221	gi|75163689	bor3_arath ame: full=probable boron transporter 3	5.68576e-13	100	72.7886	34
all-unigene002644	215	gi|75220747	srg1_arath ame: full=protein srg1 short= 1 ame: full=protein senescence-related gene 1	1.83594e-19	84	94.3597	63
all-unigene002647	554	gi|259016256	ip5p3_arath ame: full=type i inositol -trisphosphate 5-phosphatase cvp2 ame: full=protein cotyledon vascular pattern 2	7.56352e-07	82	53.5286	34
all-unigene002651	298	gi|10720313	trx_drovi ame: full=histone-lysine n-methyltransferase trithorax	1e-05	58	33.113	55
all-unigene002653	545	gi|134034173	mtg1_bovin ame: full=mitochondrial gtpase 1 flags: precursor	1.25713e-14	61	79.337	106
all-unigene002655	444	gi|193806398	pp129_arath ame: full=pentatricopeptide repeat-containing protein mitochondrial flags: precursor	4.07319e-42	82	169.859	119
all-unigene002657	565	gi|130582	polx_tobac ame: full=retrovirus-related pol polyprotein from transposon tnt 1-94 includes: ame: full=protease includes: ame: full=reverse transcriptase includes: ame: full=endonuclease	1e-05	51	45.8246	97
all-unigene002658	501	gi|130582	polx_tobac ame: full=retrovirus-related pol polyprotein from transposon tnt 1-94 includes: ame: full=protease includes: ame: full=reverse transcriptase includes: ame: full=endonuclease	8.71326e-30	64	129.413	148
all-unigene002659	210	gi|171769861	murc_xenla ame: full=muscle-related coiled-coil protein ame: full=muscle-restricted coiled-coil protein	1e-05	59	33.113	42
all-unigene002660	363	gi|119530	pdia4_human ame: full=protein disulfide-isomerase a4 ame: full=endoplasmic reticulum resident protein 70 short=er protein 70 short=erp70 ame: full=endoplasmic reticulum resident protein 72 short=er protein 72 short=erp-72 short=erp72 flags: precursor	1.73479e-54	87	210.69	120
all-unigene002662	299	gi|313471383	lacs7_arath ame: full=long chain acyl- synthetase peroxisomal	8.73063e-06	85	48.9062	35
all-unigene002663	325	gi|22329840	une1-like protein	1.82885e-25	88	107.457	71
all-unigene002665	360	gi|264664506	y4312_arath ame: full=probable lrr receptor-like serine threonine-protein kinase at4g31250 flags: precursor	1.472e-45	92	181.03	105
all-unigene002668	254	gi|1709997	smc6_schpo ame: full=structural maintenance of chromosomes protein 6 ame: full=dna repair protein rad18	1e-05	50	35.4242	68
all-unigene002669	846	gi|363548502	y4211_arath ame: full=brct domain-containing protein at4g02110	1.49007e-63	55	243.047	369
all-unigene002672	473	gi|75173061	ppr84_arath ame: full=pentatricopeptide repeat-containing protein mitochondrial flags: precursor	8.65459e-71	89	265.388	157
all-unigene002673	258	gi|6015065	ef2_betvu ame: full=elongation factor 2 short=ef-2	1.69776e-41	96	167.548	85
all-unigene002675	875	gi|12229659	aca12_arath ame: full=calcium-transporting atpase plasma membrane-type ame: full=ca(2+)-atpase isoform 12	2.09245e-76	77	285.804	202
all-unigene002676	475	gi|223635634	pp315_arath ame: full=pentatricopeptide repeat-containing protein at4g16470	4.66417e-16	58	83.5741	113
all-unigene002680	451	gi|82081010	nhlc2_chick ame: full=nhl repeat-containing protein 2	7.04381e-08	53	56.225	125
all-unigene002681	381	gi|215275614	phrf1_rat ame: full=phd and ring finger domain-containing protein 1 ame: full=ctd-binding sr-like protein ra9	1e-05	41	37.3502	85
all-unigene002682	272	gi|75162430	y1491_arath ame: full=uncharacterized protein at1g04910	2.209e-12	64	70.8626	84
all-unigene002683	319	gi|221222728	smal1_rat ame: full=swi snf-related matrix-associated actin-dependent regulator of chromatin subfamily a-like protein 1 ame: full= -related protein ame: full=sucrose nonfermenting protein 2-like 1	1e-05	80	42.743	35
all-unigene002685	480	gi|482563137	probable actin-related protein 2 3 complex subunit 2-like	7.56805e-66	91	216.083	127
all-unigene002686	374	gi|118585329	retol_arath ame: full=reticuline oxidase-like protein flags: precursor	1.56519e-18	66	91.2781	92
all-unigene002688	521	gi|12229667	hma7_arath ame: full=copper-transporting atpase ran1 ame: full=protein heavy metal atpase 7 ame: full=protein responsive to antagonist 1	1.32307e-07	82	55.8398	41
all-unigene002689	256	gi|12229667	hma7_arath ame: full=copper-transporting atpase ran1 ame: full=protein heavy metal atpase 7 ame: full=protein responsive to antagonist 1	8.16678e-13	82	55.8398	41
all-unigene002690	298	gi|75335804	ab4f_arath ame: full=abc transporter f family member 4 short=abc transporter short= 4 ame: full=gcn20-type atp-binding cassette protein gcn4	2.13057e-36	86	150.599	99
all-unigene002693	370	gi|9294362	athila retroelement orf1 protein	5.69248e-13	56	73.9442	94
all-unigene002692	206	gi|308153453	herc2_human ame: full=e3 ubiquitin-protein ligase herc2 ame: full=hect domain and rcc1-like domain-containing protein 2	1e-05	63	42.743	68
all-unigene002697	589	gi|482572068	hypothetical protein CARUB_v10010341mg	2.03462e-91	90	276.944	184
all-unigene002699	254	gi|75308838	cca11_arath ame: full=cyclin-a1-1 ame: full=g2 mitotic-specific cyclin-a1-1 short= 1 1	1.14504e-29	92	128.257	68
all-unigene002700	235	gi|297794351	hypothetical protein ARALYDRAFT_496951	1e-05	77	49.2914	40
all-unigene002701	237	gi|416642	arg7_phaau ame: full=indole-3-acetic acid-induced protein arg7	6.87138e-14	85	75.8702	56
all-unigene002702	324	gi|121707603	y996_metst ame: full=upf0179 protein msp_0996	1e-05	48	34.2686	43
all-unigene002705	317	gi|584929	chi4_brana ame: full=basic endochitinase chb4 flags: precursor	3.82222e-33	70	139.813	113
all-unigene002704	228	gi|297789526	protein trichome birefringence-like 6	2.02302e-22	87	97.8265	56
all-unigene002706	692	gi|75339056	ab33g_arath ame: full=abc transporter g family member 33 short=abc transporter short= 33 ame: full=probable pleiotropic drug resistance protein 5	8.20158e-117	93	419.468	230
all-unigene002707	447	gi|62900384	ksa_arath ame: full=ent-copalyl diphosphate chloroplastic short= short=ent-cdp synthase ame: full=ent-kaurene synthase a short=ksa ame: full=protein ga requiring 1 flags: precursor	1.16502e-68	87	258.07	148
all-unigene002709	281	gi|81884639	tm109_rat ame: full=transmembrane protein 109 ame: full=mitsugumin-23 short=mg23 flags: precursor	1e-05	53	36.1946	52
all-unigene002710	452	gi|232274	hs176_arath ame: full= kda class ii heat shock protein ame: full= kda heat shock protein short=	2.91848e-54	96	210.305	113
all-unigene002711	343	gi|18417439	protein embryo defective 2752	2.28372e-13	97	70.4774	34
all-unigene002712	301	gi|75167720	y5838_arath ame: full=probably inactive leucine-rich repeat receptor-like protein kinase at5g48380 flags: precursor	1e-05	70	44.669	37
all-unigene002713	587	gi|223635599	pglr_vitvi ame: full=probable polygalacturonase short=pg ame: full=pectinase	2.09692e-21	57	102.064	147
all-unigene002715	249	gi|110739557	reverse transcriptase	3.47905e-06	61	52.7582	67
all-unigene002718	468	gi|2506877	muc2_human ame: full=mucin-2 short=muc-2 ame: full=intestinal mucin-2 flags: precursor	1e-05	55	32.7278	40
all-unigene002719	842	gi|75100697	y4117_arath ame: full= disease resistance protein at4g11170	4.9352e-35	52	148.288	284
all-unigene002720	420	gi|75075845	vime_macfa ame: full=vimentin	8.68885e-17	100	85.5001	41
all-unigene002723	470	gi|75262625	ubp17_arath ame: full=ubiquitin carboxyl-terminal hydrolase 17 ame: full=deubiquitinating enzyme 17 short= 17 ame: full=ubiquitin thioesterase 17 ame: full=ubiquitin-specific-processing protease 17	1.04646e-36	68	152.14	146
all-unigene002725	353	gi|227438217	retroelement pol polyprotein	3.44542e-56	90	199.134	117
all-unigene002728	318	gi|508716340	transducin wd40 repeat-like superfamily protein isoform 1	1.84745e-08	43	59.3066	107
all-unigene002729	258	gi|75268246	p2b13_arath ame: full=f-box protein pp2-b13 ame: full=protein phloem protein 2-like b13 short= 2-b13	1.54628e-18	87	91.2781	54
all-unigene002730	414	gi|75337207	hsl1_arath ame: full=receptor-like protein kinase hsl1 ame: full=protein haesa-like1 flags: precursor	1.25138e-52	83	204.527	137
all-unigene002731	312	gi|125987635	rnhx1_arath ame: full= ribonuclease h protein at1g65750	1e-05	64	35.4242	39
all-unigene002733	351	gi|145559478	gogb1_human ame: full=golgin subfamily b member 1 ame: full=372 kda golgi complex-associated protein short=gcp372 ame: full=giantin ame: full=macrogolgin	1e-05	43	33.4982	114
all-unigene002734	360	gi|122165742	anm6_arath ame: full=probable protein arginine n-methyltransferase 6	9.91953e-26	78	115.161	91
all-unigene002736	478	gi|7769854	calcium-binding ef-hand domain-containing protein	8.52172e-11	62	68.5514	80
all-unigene002737	506	gi|7769854	calcium-binding ef-hand domain-containing protein	4.23203e-17	61	63.5438	80
all-unigene002741	367	gi|75206174	y2262_arath ame: full=upf0725 protein at2g20620	2.695e-10	71	63.929	60
all-unigene002742	208	gi|46395984	drl42_arath ame: full=probable disease resistance protein at5g66900	5.39035e-19	77	92.8189	66
all-unigene002745	764	gi|223635762	pp380_arath ame: full=pentatricopeptide repeat-containing protein at5g14080	3.03899e-118	92	424.476	254
all-unigene002744	442	gi|62286916	kprs4_arath ame: full=ribose-phosphate pyrophosphokinase 4 ame: full=phosphoribosyl pyrophosphate synthase 4	4.38221e-20	94	96.6709	50
all-unigene002748	310	gi|124053368	pgsa_rhos4 ame: full=cdp-diacylglycerol--glycerol-3-phosphate 3-phosphatidyltransferase ame: full=phosphatidylglycerophosphate synthase short=pgp synthase	1e-05	58	34.2686	50
all-unigene002749	233	gi|117667936	zinc finger family protein	1.10283e-47	100	160.229	77
all-unigene002750	252	gi|46395758	bcs1_danre ame: full=mitochondrial chaperone bcs1 ame: full=bcs1-like protein	2.66037e-10	63	63.929	73
all-unigene002751	276	gi|75334109	y5596_arath ame: full=probable lrr receptor-like serine threonine-protein kinase at5g59680 flags: precursor	1.85542e-27	76	120.939	91
all-unigene002752	643	gi|75097884	snc1_arath ame: full=protein suppressor of npr1- constitutive 1 short= 1 ame: full=disease resistance rpp5-like protein	3.88617e-46	70	184.496	185
all-unigene002754	477	gi|31340430	srr1_arath ame: full=protein sensitivity to red light reduced 1	1.381e-23	68	108.612	98
all-unigene002755	306	gi|122214701	bh060_arath ame: full=transcription factor bhlh60 ame: full=basic helix-loop-helix protein 60 short= 60 short=bhlh 60 ame: full=transcription factor en 91 ame: full=bhlh transcription factor bhlh060	6.65312e-09	81	59.3066	49
all-unigene002756	419	gi|229891754	rtel1_mouse ame: full=regulator of telomere elongation helicase 1	1.33739e-25	66	114.775	104
all-unigene002757	265	gi|297824431	af428414_1 at2g44240	4.0891e-35	80	132.494	87
all-unigene002758	337	gi|297825681	af428414_1 at2g44240	2.43672e-47	84	166.392	103
all-unigene002761	417	gi|226711456	ctu1_arath ame: full=cytoplasmic trna 2-thiolation protein 1 ame: full=cytoplasmic trna adenylyltransferase 1	5.26239e-35	91	145.976	83
all-unigene002762	363	gi|75324925	erl2_arath ame: full=lrr receptor-like serine threonine-protein kinase erl2 ame: full=protein erecta-like kinase 2 flags: precursor	1.13101e-24	66	111.694	114
all-unigene002763	264	gi|71153409	xcp2_arath ame: full=xylem cysteine proteinase 2 short= 2 flags: precursor	3.09598e-19	66	93.5893	92
all-unigene002766	344	gi|148887452	vin3_arath ame: full=protein vernalization insensitive 3	4.13123e-11	63	66.6254	73
all-unigene002767	606	gi|12323422	AC016972_4hypothetical protein; 43000-45608	4.71908e-24	60	107.457	138
all-unigene002772	255	gi|281312217	bgl47_arath ame: full=beta-glucosidase 47 short= 47 flags: precursor	1.18669e-10	82	65.0846	45
all-unigene002769	289	gi|482565396	mutator transposase	1.97827e-43	95	147.517	70
all-unigene002771	591	gi|123362	hmen_trigr ame: full=homeobox protein engrailed ame: full=su-hb-en	1e-05	52	35.039	69
all-unigene002775	529	gi|125987635	rnhx1_arath ame: full= ribonuclease h protein at1g65750	1.15237e-14	58	79.337	105
all-unigene002776	523	gi|238065083	ino80_arath ame: full=dna helicase ino80 short= 80 ame: full= dna helicase ino80 complex homolog 1	1.55813e-72	85	271.552	174
all-unigene002777	939	gi|75337810	osb1_arath ame: full=protein mitochondrial ame: full=organellar single-stranded dna-binding protein 1 flags: precursor	1.43836e-33	71	143.665	121
all-unigene002778	422	gi|75318791	plrx4_arath ame: full=pollen-specific leucine-rich repeat extensin-like protein 4 short= 4 short=pollen-specific lrr extensin4 ame: full=cell wall hydroxyproline-rich glycoprotein flags: precursor	4.1037e-59	90	226.098	125
all-unigene002781	570	gi|74582987	gyp2_schpo ame: full=gtpase-activating protein gyp2	1e-05	60	33.4982	41
all-unigene002783	358	gi|297802354	protein rotundifolia like 6	1.47461e-13	97	70.0922	34
all-unigene002784	582	gi|75333969	m2k6_arath ame: full=mitogen-activated protein kinase kinase 6 short= 6 short=map kinase kinase 6 ame: full=protein arabidopsis nqk1 homolog	2.75295e-90	86	330.872	204
all-unigene002786	474	gi|118582508	dll1_human ame: full=delta-like protein 1 ame: full=drosophila delta homolog 1 short=delta1 short=h-delta-1 flags: precursor	1e-05	37	32.7278	75
all-unigene002789	585	gi|264664501	y2242_arath ame: full=probable lrr receptor-like serine threonine-protein kinase at2g24230 flags: precursor	1.11861e-75	91	282.337	162
all-unigene002790	241	gi|130582	polx_tobac ame: full=retrovirus-related pol polyprotein from transposon tnt 1-94 includes: ame: full=protease includes: ame: full=reverse transcriptase includes: ame: full=endonuclease	1e-05	58	42.3578	72
all-unigene002791	276	gi|75317972	y2232_arath ame: full=probable receptor-like protein kinase at2g23200 flags: precursor	8.08566e-15	82	78.9518	51
all-unigene002793	294	gi|46395907	drl40_arath ame: full=probable disease resistance protein at5g63020 ame: full=pnd11	2.29663e-30	80	130.568	87
all-unigene002794	358	gi|1346645	nu116_yeast ame: full=nucleoporin nup116 nsp116 ame: full=nuclear pore protein nup116 nsp116	1e-05	48	35.4242	60
all-unigene002795	309	gi|1346645	nu116_yeast ame: full=nucleoporin nup116 nsp116 ame: full=nuclear pore protein nup116 nsp116	1e-05	48	36.5798	66
all-unigene002796	304	gi|75183447	lcb2b_arath ame: full=long chain base biosynthesis protein 2b short= 2b ame: full=serine palmitoyltransferase 1 short= 1	1.13222e-16	93	85.1149	48
all-unigene002797	249	gi|75180412	lcb2a_arath ame: full=long chain base biosynthesis protein 2a short= 2a ame: full=long chain base biosynthesis protein 2 short= 2	4.81471e-36	93	149.443	83
all-unigene002800	291	gi|482557886	hypothetical protein CARUB_v10002618mg	8.94951e-12	75	69.707	88
all-unigene002801	338	gi|75191236	bh150_arath ame: full=transcription factor bhlh150 ame: full=atbs1 interacting factor 1 ame: full=basic helix-loop-helix protein 150 short= 150 short=bhlh 150 ame: full=transcription factor en 145 ame: full=bhlh transcription factor bhlh150	8.08046e-23	59	105.531	118
all-unigene002802	201	gi|75268056	fb100_arath ame: full=f-box protein at2g07140	1e-05	59	33.113	57
all-unigene002805	215	gi|62510956	sas6_caeel ame: full=spindle assembly abnormal protein 6	1e-05	48	35.4242	82
all-unigene002806	286	gi|74852554	ccz1_dicdi ame: full=vacuolar fusion protein ccz1 homolog	1e-05	63	42.743	41
all-unigene002809	268	gi|74751722	tm40l_human ame: full=mitochondrial import receptor subunit tom40b ame: full=protein tomm40-like	1e-05	50	33.8834	48
all-unigene002812	556	gi|147766544	retroelement pol poly	1.85377e-26	51	115.931	183
all-unigene002816	278	gi|74582973	tas3_schpo ame: full=rna-induced transcriptional silencing complex protein tas3 short=rits protein tas3	1e-05	47	32.7278	61
all-unigene002814	534	gi|310947334	ptr26_arath ame: full=probable peptide nitrate transporter at2g02020	6.0927e-57	93	187.963	105
all-unigene002815	402	gi|75272176	fbl36_arath ame: full=f-box lrr-repeat protein at2g29930	3.72936e-20	63	96.6709	126
all-unigene002818	341	gi|74716283	muc16_human ame: full=mucin-16 short=muc-16 ame: full=ovarian cancer-related tumor marker ca125 short=ca-125 ame: full=ovarian carcinoma antigen ca125	1e-05	44	33.113	100
all-unigene002820	242	gi|297851542	protein binding protein	4.23145e-14	87	75.8702	48
all-unigene002822	339	gi|3123215	dnaj2_thet8 ame: full=chaperone protein 2	1.4744e-08	80	58.151	41
all-unigene002824	220	gi|297791713	hypothetical protein ARALYDRAFT_917455	6.9546e-09	66	59.6918	56
all-unigene002826	236	gi|45477041	m810_arath ame: full=uncharacterized mitochondrial protein g00810 ame: full=orf240b	2.69583e-18	81	90.5077	55
all-unigene002827	392	gi|29839286	comt2_poptm ame: full=caffeic acid 3-o-methyltransferase 2 short=caomt-2 short=comt-2 ame: full=s-adenosysl-l-methionine:caffeic acid 3-o-methyltransferase 2	4.0406e-11	62	66.6254	81
all-unigene002828	669	gi|75100697	y4117_arath ame: full= disease resistance protein at4g11170	4.56049e-16	47	84.7297	219
all-unigene002830	779	gi|1351624	nst1_schpo ame: full=stress response protein nst1	1e-05	39	47.3654	189
all-unigene002833	361	gi|193806639	y1295_arath ame: full=uncharacterized pkhd-type hydroxylase at1g22950	1e-05	67	41.5874	37
all-unigene002832	369	gi|12323542	ac068667_33reverse 100033-105622	1e-05	68	49.2914	38
all-unigene002834	399	gi|229891488	pks33_dicdi ame: full=probable polyketide synthase 33 short=dipks33	1e-05	53	33.4982	41
all-unigene002836	237	gi|7682800	copia-type pol poly	1.01208e-17	88	86.2705	53
all-unigene002835	333	gi|1345972	fad3d_arath ame: full=temperature-sensitive omega-3 fatty acid chloroplastic flags: precursor	2.04283e-58	93	223.787	111
all-unigene002837	401	gi|75333473	ab13b_arath ame: full=abc transporter b family member 13 short=abc transporter short= 13 ame: full=p-glycoprotein 13 ame: full= multidrug resistance protein 15	2.1712e-44	79	177.178	131
all-unigene002839	397	gi|223635599	pglr_vitvi ame: full=probable polygalacturonase short=pg ame: full=pectinase	1e-05	77	46.2098	36
all-unigene002840	317	gi|75169245	ap3d_arath ame: full=ap-3 complex subunit delta ame: full=adapter-related protein complex 3 subunit delta ame: full=delta-adaptin short=at-d-ad short=at-delta-ad	1.23448e-23	95	82.4185	46
all-unigene002841	402	gi|141475	ytx2_xenla ame: full=transposon tx1 uncharacterized 149 kda protein ame: full=orf 2	1e-05	54	35.039	55
all-unigene002843	365	gi|75216084	sot13_arath ame: full=cytosolic sulfotransferase 13 short= 13	1e-05	42	32.3426	106
all-unigene002845	677	gi|75309106	thad_arath ame: full=cytochrome p450 705a5 ame: full=thalian-diol desaturase short=	4.69982e-45	60	181.03	205
all-unigene002846	226	gi|482566366	major facilitator protein	1.70879e-07	85	55.8398	35
all-unigene002849	510	gi|1169735	mtor_human ame: full=serine threonine-protein kinase mtor ame: full=fk506-binding protein 12-rapamycin complex-associated protein 1 ame: full=fkbp12-rapamycin complex-associated protein ame: full=mammalian target of rapamycin short=mtor ame: full=mechanistic target of rapamycin ame: full=rapamycin and fkbp12 target 1 ame: full=rapamycin target protein 1	1e-05	47	33.8834	73
all-unigene002851	338	gi|75216847	pp192_arath ame: full=pentatricopeptide repeat-containing protein at2g37320	1.08453e-43	83	174.866	112
all-unigene002853	336	gi|482548903	g2484-1 isoform 3	9.2219e-58	90	197.978	111
all-unigene002856	342	gi|75206861	pp320_arath ame: full=pentatricopeptide repeat-containing protein chloroplastic flags: precursor	1.22954e-47	90	187.963	114
all-unigene002858	207	gi|264664499	y4245_arath ame: full=probable lrr receptor-like serine threonine-protein kinase at4g20450 flags: precursor	1.72081e-33	98	140.969	69
all-unigene002859	491	gi|205830840	wap_arath ame: full=wpp domain-associated protein	2.35236e-45	77	181.03	163
all-unigene002860	266	gi|205830840	wap_arath ame: full=wpp domain-associated protein	3.78132e-09	94	60.077	35
all-unigene002861	545	gi|75164918	fb251_arath ame: full=f-box protein at5g03970	1.9387e-35	67	107.842	95
all-unigene002863	772	gi|32363198	mkl2_mouse ame: full=mkl myocardin-like protein 2 ame: full=myocardin-related transcription factor b short=mrtf-b	1e-05	58	39.2762	56
all-unigene002869	244	gi|44888115	m310_arath ame: full=uncharacterized mitochondrial protein g00310 ame: full=orf154	1.38301e-13	70	68.9366	62
all-unigene002865	352	gi|297853608	predicted protein	1.45986e-15	91	75.0998	57
all-unigene002866	261	gi|75311783	org3_arath ame: full=transcription factor org3 ame: full=basic helix-loop-helix protein 39 short= 39 short=bhlh 39 ame: full=obp3-responsive gene 3 ame: full=transcription factor en 9 ame: full=bhlh transcription factor bhlh039	4.97003e-09	74	59.6918	43
all-unigene002867	764	gi|51316421	nac78_arath ame: full=nac domain-containing protein 78 short=anac078	3.0959e-54	75	211.846	153
all-unigene002868	347	gi|75216707	ppr76_arath ame: full=pentatricopeptide repeat-containing protein mitochondrial flags: precursor	1.65605e-44	84	177.563	115
all-unigene002870	416	gi|29839627	wrk16_arath ame: full=probable wrky transcription factor 16 ame: full=wrky dna-binding protein 16	1e-05	56	39.6614	44
all-unigene002871	434	gi|75337316	rax2_arath ame: full=transcription factor rax2 ame: full=myb-related protein 38 short= 38 ame: full=protein regulator of axillary meristems 2	3.06008e-63	83	239.965	146
all-unigene002872	260	gi|75330727	sd25_arath ame: full=g-type lectin s-receptor-like serine threonine-protein kinase sd2-5 ame: full=s-domain-2 receptor kinase 5 short=sd2-5 flags: precursor	9.63235e-29	78	125.176	85
all-unigene002873	550	gi|75181297	pcs1l_arath ame: full=aspartic proteinase pcs1 ame: full=aspartic protease 38 short= 38 ame: full=protein embryo defective 24 ame: full=protein promotion of cell survival 1 flags: precursor	2.89352e-51	67	201.06	176
all-unigene002875	298	gi|229891481	pme44_arath ame: full=probable pectinesterase pectinesterase inhibitor 44 includes: ame: full=pectinesterase inhibitor 44 ame: full=pectin methylesterase inhibitor 44 includes: ame: full=pectinesterase 44 short=pe 44 ame: full=pectin methylesterase 44 short= 44 flags: precursor	2.29221e-14	69	77.411	66
all-unigene002877	631	gi|62287490	ptcd1_ponab ame: full=pentatricopeptide repeat-containing protein mitochondrial	1e-05	52	35.039	69
all-unigene002879	372	gi|384950751	sp13a_arath ame: full=squamosa promoter-binding-like protein 13a	6.75048e-54	84	208.764	125
all-unigene002880	208	gi|51316421	nac78_arath ame: full=nac domain-containing protein 78 short=anac078	7.77828e-10	69	62.3882	46
all-unigene002881	243	gi|297827271	hypothetical protein ARALYDRAFT_345496	1.94089e-15	84	75.8702	50
all-unigene002882	337	gi|223590203	ep300_human ame: full=histone acetyltransferase p300 short=p300 hat ame: full=e1a-associated protein p300	1e-05	43	33.4982	103
all-unigene002884	235	gi|41017241	glr35_arath ame: full=glutamate receptor ame: full=ionotropic glutamate receptor glr6 ame: full=ligand-gated ion channel flags: precursor	2.27159e-33	91	140.584	78
all-unigene002883	402	gi|74896814	rs14_dicdi ame: full=40s ribosomal protein s14	7.31241e-45	96	107.071	58
all-unigene002886	430	gi|482560883	myb domain protein 17	2.58079e-46	77	162.54	141
all-unigene002887	343	gi|75273780	crr18_arath ame: full=cysteine-rich repeat secretory protein 18 flags: precursor	2.95378e-17	78	87.0409	66
all-unigene002889	263	gi|20139278	pldg1_arath ame: full=phospholipase d gamma 1 short= gamma1 short=pld gamma 1 ame: full=choline phosphatase ame: full=lecithinase d ame: full=lipophosphodiesterase ii	9.27861e-32	86	135.191	87
all-unigene002891	841	gi|125987635	rnhx1_arath ame: full= ribonuclease h protein at1g65750	2.83601e-83	67	308.531	283
all-unigene002892	263	gi|75181645	fb223_arath ame: full= f-box protein at4g09190	1e-05	53	45.8246	65
all-unigene002893	870	gi|75171850	pp366_arath ame: full= pentatricopeptide repeat-containing protein mitochondrial flags: precursor	2.85313e-118	80	424.861	307
all-unigene002894	655	gi|75335303	y1061_arath ame: full=probably inactive leucine-rich repeat receptor-like protein kinase at1g50610 flags: precursor	2.29324e-41	69	168.703	163
all-unigene002895	382	gi|12643760	gale1_arath ame: full=udp-glucose 4-epimerase 1 ame: full=galactowaldenase 1 ame: full=udp-galactose 4-epimerase 1	8.4488e-49	94	191.815	97
all-unigene002896	343	gi|482573323	ta11-like non-ltr retroelement protein	4.28445e-09	67	60.8474	58
all-unigene002899	340	gi|160011430	irs4_aspnc ame: full=increased rdna silencing protein 4	1e-05	38	33.4982	67
all-unigene002902	216	gi|297839589	wound-responsive protein	8.21706e-20	77	91.6633	71
all-unigene002904	379	gi|116717	capsd_camvc ame: full=capsid protein short=cp ame: full=coat protein	1e-05	46	34.2686	58
all-unigene002906	959	gi|292630785	glyt5_arath ame: full=probable glycosyltransferase at5g20260	2.07853e-120	79	432.18	305
all-unigene002907	336	gi|75337294	cadh3_arath ame: full=cinnamyl alcohol dehydrogenase 3 short= 3	6.57156e-57	97	218.779	110
all-unigene002908	218	gi|75427337	aglb_thene ame: full=cyclomaltodextrinase ame: full=maltodextrin glucosidase	1e-05	56	33.4982	46
all-unigene002909	337	gi|75251251	atxr2_arath ame: full=histone-lysine n-methyltransferase atxr2 ame: full=protein set domain group 36 ame: full=trithorax-related protein 2 short=trx-related protein 2	1.99246e-29	64	127.487	106
all-unigene002910	201	gi|297824789	af439832_1 at2g47010	1.19212e-23	98	100.908	50
all-unigene002912	311	gi|115660	casb_bovin ame: full=beta-casein contains: ame: full=casoparan contains: ame: full=antioxidant peptide contains: ame: full=casohypotensin flags: precursor	1e-05	58	37.3502	67
all-unigene002914	284	gi|82570059	mads-box family protein	3.42519e-19	92	86.2705	53
all-unigene002915	272	gi|109940187	caes_arath ame: full=probable carbohydrate esterase at4g34215	3.89021e-17	72	86.6557	80
all-unigene002916	692	gi|254763340	gid8_dicdi ame: full=glucose-induced degradation protein 8 homolog	2.90513e-13	50	75.485	206
all-unigene002917	745	gi|46577339	tmvrn_nicgu ame: full=tmv resistance protein n	1.81027e-27	50	122.865	253
all-unigene002918	234	gi|126215	leuk_rat ame: full=leukosialin ame: full=leukocyte sialoglycoprotein ame: full=sialophorin ame: full=w3 13 antigen ame: cd_antigen=cd43 flags: precursor	1e-05	43	32.7278	71
all-unigene002921	629	gi|122205675	brxl5_orysj ame: full= protein brevis radix-like 5 short= 5	1e-05	56	37.3502	53
all-unigene002919	458	gi|75274199	cle27_arath ame: full=clavata3 esr -related protein 27 contains: ame: full=cle27p flags: precursor	4.02205e-22	67	103.605	97
all-unigene002923	336	gi|130582	polx_tobac ame: full=retrovirus-related pol polyprotein from transposon tnt 1-94 includes: ame: full=protease includes: ame: full=reverse transcriptase includes: ame: full=endonuclease	1e-05	56	36.965	48
all-unigene002924	473	gi|84028234	orc6_arath ame: full=origin recognition complex subunit 6	1.52931e-20	84	80.8777	59
all-unigene002925	309	gi|75100697	y4117_arath ame: full= disease resistance protein at4g11170	9.86309e-21	74	98.5969	85
all-unigene002927	732	gi|83305680	ddps5_arath ame: full=dehydrodolichyl diphosphate synthase 5 short=dedol-pp synthase 5	5.63222e-10	84	64.6994	44
all-unigene002928	273	gi|75247676	y5436_arath ame: full=math domain-containing protein at5g43560	1e-05	58	33.113	43
all-unigene002930	588	gi|75264381	dreb3_arath ame: full=dehydration-responsive element-binding protein 3 ame: full=protein tiny 2	1.93553e-67	81	254.988	170
all-unigene002931	885	gi|1170660	kime_arath ame: full=mevalonate kinase short=mk	1.27632e-113	90	409.453	245
all-unigene002932	482	gi|75265492	fbx15_arath ame: full= f-box only protein 15	8.70679e-21	60	99.3673	120
all-unigene002934	237	gi|73921131	y4466_arath ame: full=zf-hd homeobox protein at4g24660 short= -22	1.62793e-31	87	134.42	79
all-unigene002936	327	gi|75272176	fbl36_arath ame: full=f-box lrr-repeat protein at2g29930	2.45832e-24	85	110.538	70
all-unigene002937	403	gi|75272176	fbl36_arath ame: full=f-box lrr-repeat protein at2g29930	9.4272e-32	74	135.191	112
all-unigene002935	376	gi|172046820	s10a7_human ame: full=protein s100-a7 ame: full=psoriasin ame: full=s100 calcium-binding protein a7	1.76798e-46	91	184.111	101
all-unigene002938	227	gi|56748564	atm_arath ame: full=serine threonine-protein kinase atm ame: full=ataxia telangiectasia mutated homolog short=	2.1474e-12	85	70.8626	48
all-unigene002939	511	gi|75278047	bh004_arath ame: full=transcription factor myc4 short= 4 ame: full=basic helix-loop-helix protein 4 short= 4 short=bhlh 4 ame: full=transcription factor en 37 ame: full=bhlh transcription factor bhlh004	5.09174e-41	61	166.777	185
all-unigene002940	604	gi|21542466	y2979_arath ame: full=uncharacterized protein mitochondrial flags: precursor	1.45965e-12	67	72.7886	78
all-unigene002941	239	gi|42567636	pectate lyase family protein	2.37072e-14	81	75.8702	53
all-unigene002942	399	gi|267199	ul07_shv21 ame: full=gene 42 protein	1e-05	55	35.8094	56
all-unigene002943	249	gi|297834994	predicted protein	2.25004e-15	77	78.9518	62
all-unigene002946	318	gi|59798920	sera_plaf7 ame: full=serine-repeat antigen protein ame: full=111 kda antigen ame: full=p126 flags: precursor	1e-05	47	35.8094	69
all-unigene002949	441	gi|15238273	ankyrin repeat family protein	2.62932e-60	95	207.223	131
all-unigene002959	688	gi|75127070	f8h_arath ame: full=probable glucuronoxylan glucuronosyltransferase f8h ame: full=fra8 homolog ame: full=protein fragile fiber 8 homolog	1.83689e-68	93	258.84	144
all-unigene002955	479	gi|193806611	da1_arath ame: full=protein da1 ame: full=protein suppressor of large seed and organ phenotypes of da1-1 1	5.54995e-12	54	70.0922	88
all-unigene002960	345	gi|297807453	rubisco methyltransferase family protein	5.19966e-14	64	76.2554	78
all-unigene002961	294	gi|49036485	robo4_mouse ame: full=roundabout homolog 4 flags: precursor	1e-05	47	32.7278	80
all-unigene002962	232	gi|482569350	golgi-body localisation and rna pol ii promoter fmp27 domain-containing protein	9.48466e-12	77	69.3218	48
all-unigene002965	247	gi|482549817	protein agamous-like 42	3.17571e-11	85	64.6994	41
all-unigene002966	253	gi|263415884	coq4_picgu ame: full=ubiquinone biosynthesis protein mitochondrial ame: full=coenzyme q biosynthesis protein 4 flags: precursor	1e-05	45	33.4982	59
all-unigene002967	265	gi|75276320	mcmbp_arath ame: full=mini-chromosome maintenance complex-binding protein short=mcm-bp short=mcm-binding protein ame: full=protein e2f target gene 1	2.87518e-33	95	140.198	70
all-unigene002969	538	gi|75311227	brtl1_arath ame: full=probable mitochondrial adenine nucleotide transporter btl1 ame: full=adenine nucleotide transporter bt1-like protein 1	1.34506e-29	76	129.028	96
all-unigene002974	399	gi|8777565	athila retroelement orf1 protein	2.27383e-16	75	83.9593	69
all-unigene002973	253	gi|334302922	chmu_arath ame: full=chorismate chloroplastic ame: full=cm-1 flags: precursor	1e-05	55	32.3426	56
all-unigene002977	380	gi|9296990	klk13_human ame: full=kallikrein-13 ame: full=kallikrein-like protein 4 short=klk-l4 flags: precursor	1e-05	56	32.7278	37
all-unigene002980	1077	gi|46396675	rps5_arath ame: full=disease resistance protein rps5 ame: full=resistance to pseudomonas syringae protein 5 ame: full=pnd3 pnd10	2.5515e-109	73	395.586	358
all-unigene002981	260	gi|259511398	slx1_dromo ame: full=structure-specific endonuclease subunit slx1 homolog	1e-05	50	33.113	53
all-unigene002983	555	gi|27805508	matk_brohe ame: full=maturase k ame: full=intron maturase	1e-05	49	34.6538	59
all-unigene002984	618	gi|482569640	zinc knuckle (cchc-type) family protein	2.01319e-23	83	105.916	68
all-unigene002985	798	gi|75097884	snc1_arath ame: full=protein suppressor of npr1- constitutive 1 short= 1 ame: full=disease resistance rpp5-like protein	2.80281e-69	71	261.922	269
all-unigene002989	244	gi|75100697	y4117_arath ame: full= disease resistance protein at4g11170	2.05614e-10	72	64.3142	61
all-unigene002990	716	gi|297827685	hypothetical protein ARALYDRAFT_903340	1.30302e-20	78	95.1301	129
all-unigene002991	365	gi|9989049	ac018460_6 retroelement polyprotein	2.22569e-20	75	95.9005	107
all-unigene002992	880	gi|229890388	hsdd2_arath ame: full=3beta-hydroxysteroid-dehydrogenase decarboxylase isoform 2 short=at3betahsd d2 ame: full=4alpha-carboxysterol-c3-dehydrogenase c4-decarboxylase isoform 1-2 ame: full=reticulon-like protein b19 short= 19 ame: full=sterol-4-alpha-carboxylate 3-dehydrogenase decarboxylating	2.91234e-126	94	451.44	257
all-unigene002993	487	gi|264664489	y3475_arath ame: full=probable lrr receptor-like serine threonine-protein kinase at3g47570 flags: precursor	1e-05	41	46.595	148
all-unigene002994	297	gi|9665114	retroelement pol polyprotein	5.11747e-42	86	150.984	97
all-unigene002995	275	gi|334188161	tbp-associated factor 4	1.78449e-23	79	103.219	73
all-unigene002996	355	gi|75262477	gstt3_arath ame: full=glutathione s-transferase t3 short= 3 ame: full=gst class-theta member 3 ame: full=glutathione s-transferase 10c	1.65419e-12	77	71.2478	45
all-unigene002999	313	gi|261277764	rrf2m_aspfn ame: full=ribosome-releasing factor mitochondrial short=rrf2mt ame: full=elongation factor g mitochondrial short=ef-g2mt short=mef-g 2 flags: precursor	1e-05	50	33.4982	69
all-unigene003000	295	gi|584929	chi4_brana ame: full=basic endochitinase chb4 flags: precursor	6.86044e-43	84	172.17	98
all-unigene003001	614	gi|75070555	hs90b_ponab ame: full=heat shock protein hsp 90-beta	1.25338e-75	72	282.337	204
all-unigene003003	818	gi|146291076	yi31b_yeast ame: full=transposon ty3-i gag-pol polyprotein ame: full=gag3-pol3 ame: full=transposon ty3-2 tya-tyb polyprotein contains: ame: full=capsid protein short=ca ame: full=p24 contains: ame: full=spacer peptide p3 contains: ame: full=nucleocapsid protein p11 short=nc contains: ame: full=ty3 protease short=pr ame: full=p16 contains: ame: full=spacer peptide j contains: ame: full=reverse tr…	1.19694e-30	47	133.65	256
all-unigene003002	507	gi|75274280	pp238_arath ame: full= pentatricopeptide repeat-containing protein mitochondrial flags: precursor	1.8812e-80	93	297.745	168
all-unigene003004	445	gi|122242336	pp105_arath ame: full=pentatricopeptide repeat-containing protein at1g64580	1.64461e-30	63	131.339	146
all-unigene003005	325	gi|166201361	ubp12_arath ame: full=ubiquitin carboxyl-terminal hydrolase 12 ame: full=deubiquitinating enzyme 12 short= 12 ame: full=ubiquitin thioesterase 12 ame: full=ubiquitin-specific-processing protease 12	1e-05	52	38.1206	51
all-unigene003007	318	gi|75025221	myoi_dicdi ame: full=myosin-i heavy chain ame: full=class vii unconventional myosin ame: full= short= 7	6.10228e-31	78	132.494	100
all-unigene003008	301	gi|226711456	ctu1_arath ame: full=cytoplasmic trna 2-thiolation protein 1 ame: full=cytoplasmic trna adenylyltransferase 1	2.06063e-34	100	144.05	68
all-unigene003009	247	gi|297791713	rna-directed dna polymerase (reverse transcriptase)-related family protein	8.68144e-19	70	87.4261	81
all-unigene003010	208	gi|75333904	y5393_arath ame: full=probable receptor-like protein kinase at5g39030 flags: precursor	2.18188e-20	93	97.4413	62
all-unigene003011	263	gi|482576054	ac013427_3 a myb family transcription factor gene gi	6.21402e-10	68	63.5438	48
all-unigene003013	352	gi|374095396	fbk16_arath ame: full= f-box kelch-repeat protein at1g27420	1.64463e-44	93	177.563	92
all-unigene003016	691	gi|118572471	gse1_danre ame: full=genetic suppressor element 1	1e-05	50	34.6538	71
all-unigene003014	660	gi|75335729	lrk63_arath ame: full=lectin-domain containing receptor kinase short= - ame: full=lectin receptor kinase flags: precursor	4.91452e-92	86	337.035	222
all-unigene003018	250	gi|297797079	remorin family protein	4.78028e-24	96	100.908	58
all-unigene003019	626	gi|172044094	nst1_picst ame: full=stress response protein nst1	1e-05	54	38.891	81
all-unigene003020	344	gi|20139209	mraz_bachd ame: full=protein	1e-05	55	32.7278	36
all-unigene003021	382	gi|338817595	atg26_crynj ame: full=sterol 3-beta-glucosyltransferase ame: full=autophagy-related protein 26	1e-05	54	32.7278	44
all-unigene003022	334	gi|75042437	rtel1_ponab ame: full=regulator of telomere elongation helicase 1	5.86843e-14	85	56.9954	42
all-unigene003025	371	gi|23503044	pde8a_human ame: full=high affinity camp-specific and ibmx-insensitive 3 -cyclic phosphodiesterase 8a	1e-05	46	33.4982	58
all-unigene003026	492	gi|74996834	sylc_dicdi ame: full=leucine--trna cytoplasmic ame: full=leucyl-trna synthetase short=	1.27001e-46	75	185.267	158
all-unigene003028	283	gi|75216815	fb113_arath ame: full= f-box protein at2g19630	1e-05	71	35.8094	35
all-unigene003030	240	gi|42558925	dioxl_arath ame: full= -dopa dioxygenase extradiol-like protein	2.41949e-35	96	147.132	79
all-unigene003031	525	gi|8928408	tba_wheat ame: full=tubulin alpha chain	1.78687e-60	100	231.491	110
all-unigene003032	493	gi|75274294	fb151_arath ame: full= f-box protein at3g17400	9.97528e-12	77	69.3218	45
all-unigene003033	254	gi|263419056	erl1_arath ame: full=lrr receptor-like serine threonine-protein kinase erl1 ame: full=protein erecta-like kinase 1 flags: precursor	6.07153e-31	83	132.494	84
all-unigene003034	666	gi|89257624	hypothetical protein 31.t00014	3.54524e-28	55	113.235	129
all-unigene003035	346	gi|62286640	aco12_arath ame: full= peroxisomal acyl-coenzyme a oxidase	9.06602e-51	100	198.364	96
all-unigene003037	289	gi|75322747	zat5_arath ame: full=zinc finger protein zat5	1.45803e-08	60	58.151	91
all-unigene003040	391	gi|166201360	ubp11_arath ame: full= ubiquitin carboxyl-terminal hydrolase 11 ame: full=deubiquitinating enzyme 11 short= 11 ame: full=ubiquitin thioesterase 11 ame: full=ubiquitin-specific-processing protease 11	1e-05	57	32.7278	35
all-unigene003042	342	gi|297798182	uncharacterized loc101208336	8.67703e-16	88	78.5666	51
all-unigene003043	409	gi|586783	ymf40_marpo ame: full=uncharacterized mitochondrial protein ymf40 ame: full=orf502	1e-05	58	46.9802	84
all-unigene003044	787	gi|75303682	atb17_arath ame: full=homeobox-leucine zipper protein athb-17 ame: full=hd-zip protein athb-17 ame: full=homeodomain transcription factor athb-17	4.24478e-78	75	291.197	224
all-unigene003045	317	gi|62900392	lgt_staeq ame: full=prolipoprotein diacylglyceryl transferase	1e-05	53	33.4982	47
all-unigene003046	294	gi|38502834	pot1_arath ame: full=potassium transporter 1 short= 1 short= 1 short= 1	8.69863e-30	98	128.642	68
all-unigene003049	462	gi|31076854	nltp3_arath ame: full=non-specific lipid-transfer protein 3 short=ltp 3 flags: precursor	4.84315e-31	77	133.265	100
all-unigene003051	212	gi|75313793	caat7_arath ame: full=cationic amino acid transporter chloroplastic flags: precursor	5.72449e-21	96	99.3673	52
all-unigene003052	201	gi|123354667	dnlj_cyth3 ame: full=dna ligase ame: full=polydeoxyribonucleotide synthase	1e-05	59	32.3426	59
all-unigene003054	555	gi|341941023	lats1_mouse ame: full=serine threonine-protein kinase lats1 ame: full=large tumor suppressor homolog 1 ame: full=warts protein kinase	1e-05	53	34.6538	52
all-unigene003055	909	gi|47117664	abce1_human ame: full=atp-binding cassette sub-family e member 1 ame: full=2 -5 -oligoadenylate-binding protein ame: full= 68 ame: full=rnase l inhibitor ame: full=ribonuclease 4 inhibitor short=rns4i	1.12962e-61	69	189.119	215
all-unigene003056	281	gi|56404951	trpm6_human ame: full=transient receptor potential cation channel subfamily m member 6 ame: full=channel kinase 2 ame: full=melastatin-related trp cation channel 6	1e-05	49	33.4982	71
all-unigene003057	362	gi|297796849	hypothetical protein ARALYDRAFT_496030	1.43632e-42	78	157.918	129
all-unigene003062	237	gi|166198578	dgtp_klep7 ame: full=deoxyguanosinetriphosphate triphosphohydrolase short=dgtp triphosphohydrolase short=dgtpase	1e-05	52	32.7278	42
all-unigene003064	293	gi|9945082	non-ltr retroelement reverse transcriptase	6.09694e-09	62	61.6178	77
all-unigene003065	395	gi|264664533	y5457_arath ame: full=probable lrr receptor-like serine threonine-protein kinase at5g45780 flags: precursor	7.46468e-69	99	258.455	131
all-unigene003066	397	gi|85540956	aspg2_arath ame: full=probable isoaspartyl peptidase l-asparaginase 2 ame: full=l-asparagine amidohydrolase 2 contains: ame: full=isoaspartyl peptidase l-asparaginase 2 subunit alpha contains: ame: full=isoaspartyl peptidase l-asparaginase 2 subunit beta flags: precursor	8.60899e-25	95	112.079	60
all-unigene003067	310	gi|334302867	xth11_arath ame: full=probable xyloglucan endotransglucosylase hydrolase protein 11 short=at-xth11 short=xth-11 flags: precursor	2.59555e-21	84	100.523	64
all-unigene003068	411	gi|46577339	tmvrn_nicgu ame: full=tmv resistance protein n	1.11058e-16	57	85.1149	140
all-unigene003069	647	gi|75263039	gatb_arath ame: full=glutamyl-trna amidotransferase subunit chloroplastic mitochondrial short=glu- subunit b flags: precursor	1.07583e-12	62	70.4774	87
all-unigene003073	313	gi|2191144	glycosyl transferase family 1 protein	8.63305e-56	92	195.282	104
all-unigene003074	483	gi|122102665	samkc_dicdi ame: full=probable serine threonine-protein kinase samkc ame: full=sam domain-containing protein kinase c	1e-05	56	33.8834	55
all-unigene003075	320	gi|82183719	mxc_danre ame: full=interferon-induced gtp-binding protein ame: full=ifn-inducible antiviral protein ame: full=interferon-inducible protein	1e-05	57	32.3426	47
all-unigene003077	404	gi|75263847	p2a15_arath ame: full=f-box protein pp2-a15 ame: full=protein phloem protein 2-like a15 short= 2-a15	2.41406e-11	91	67.3958	34
all-unigene003078	435	gi|160370002	cd2_human ame: full=t-cell surface antigen cd2 ame: full=erythrocyte receptor ame: full=lfa-2 ame: full=lfa-3 receptor ame: full=rosette receptor ame: full=t-cell surface antigen t11 leu-5 ame: cd_antigen=cd2 flags: precursor	1e-05	39	33.113	56
all-unigene003079	537	gi|81986455	iap3_oshvf ame: full= apoptosis inhibitor orf99	1e-05	49	34.6538	59
all-unigene003081	474	gi|81897583	ptn7_mouse ame: full=tyrosine-protein phosphatase non-receptor type 7 ame: full=hematopoietic protein-tyrosine phosphatase short=heptp	1e-05	46	33.113	79
all-unigene003082	329	gi|74599076	yth1_emeni ame: full=mrna 3 -end-processing protein yth1	1e-05	60	33.113	38
all-unigene003083	373	gi|313471776	y1670_arath ame: full=probable receptor-like protein kinase at1g67000 flags: precursor	4.53294e-34	88	142.895	93
all-unigene003084	202	gi|68565642	pcp_mouse ame: full=lysosomal pro-x carboxypeptidase ame: full=proline carboxypeptidase ame: full=prolylcarboxypeptidase short=prcp flags: precursor	2.131e-07	58	54.299	65
all-unigene003085	255	gi|47605918	mic1_human ame: full=uncharacterized protein c18orf8 ame: full=colon cancer-associated protein mic1 short=mic-1	1e-05	56	32.3426	57
all-unigene003086	261	gi|75220260	crf1_arath ame: full=ethylene-responsive transcription factor crf1 ame: full=protein cytokinin response factor 1	2.44741e-24	86	110.538	67
all-unigene003089	543	gi|334302842	p2b15_arath ame: full=f-box protein pp2-b15 ame: full=protein phloem protein 2-like b15 short= 2-b15	6.32305e-83	87	306.22	186
all-unigene003088	364	gi|75318481	aur3_arath ame: full=serine threonine-protein kinase aurora-3 short= ur3 ame: full=aurora-like kinase 3	1.38095e-35	87	147.902	90
all-unigene003090	309	gi|75168920	ari16_arath ame: full=probable e3 ubiquitin-protein ligase ari16 ame: full=ariadne-like protein ari16 ame: full=protein ariadne homolog 16	1e-05	45	41.5874	48
all-unigene003094	622	gi|395406783	med6_arath ame: full=mediator of rna polymerase ii transcription subunit 6	3.00694e-08	68	58.5362	60
all-unigene003095	206	gi|82082519	vps53_chick ame: full=vacuolar protein sorting-associated protein 53 homolog	3.06793e-06	74	50.447	50
all-unigene003096	468	gi|1351152	syfb_mycge ame: full=phenylalanine--trna ligase beta subunit ame: full=phenylalanyl-trna synthetase beta subunit short=	1e-05	46	36.965	93
all-unigene003101	1081	gi|75132343	crs1_orysj ame: full=chloroplastic group iia intron splicing facilitator chloroplastic ame: full=chloroplastic rna splicing factor 1 ame: full=protein chloroplast rna splicing 1 flags: precursor	1e-05	47	35.4242	61
all-unigene003102	212	gi|122244095	pp130_arath ame: full=pentatricopeptide repeat-containing protein at1g77405	2.9332e-25	66	113.62	96
all-unigene003103	331	gi|75165198	csp3_arath ame: full=cold shock domain-containing protein 3 short= 3	1e-05	55	40.0466	40
all-unigene003105	332	gi|75040155	gbp1_cerae ame: full=interferon-induced guanylate-binding protein 1 ame: full=gtp-binding protein 1 short=gbp-1 ame: full=guanine nucleotide-binding protein 1 flags: precursor	1e-05	64	34.2686	37
all-unigene003106	311	gi|75338812	drp4c_arath ame: full=dynamin-related protein 4c	4.25425e-32	89	136.346	86
all-unigene003107	560	gi|84029610	aef1_gibze ame: full=chromatin modification-related protein eaf1 ame: full=esa1-associated factor 1 ame: full=vacuolar import and degradation protein 21	1e-05	56	34.2686	67
all-unigene003108	596	gi|75169898	y1385_arath ame: full=btb poz domain-containing protein at1g63850	2.90144e-58	95	224.557	115
all-unigene003110	322	gi|482562751	cell division control 6	7.01554e-18	65	87.0409	85
all-unigene003111	834	gi|116247766	tng2_bovin ame: full=transport and golgi organization 2 homolog	1e-05	50	50.8322	132
all-unigene003114	221	gi|14916992	h1_wheat ame: full=histone h1	8.45692e-25	98	112.079	59
all-unigene003115	233	gi|482565551	transducin wd-40 repeat-containing protein	1.03049e-46	97	169.474	77
all-unigene003117	311	gi|75313290	u73d1_arath ame: full=udp-glycosyltransferase 73d1	1.5061e-45	91	181.03	103
all-unigene003122	348	gi|729738	hmgl_wheat ame: full=hmg1 2-like protein	2.16042e-36	76	150.599	106
all-unigene003123	268	gi|29839687	wrk19_arath ame: full=probable wrky transcription factor 19 ame: full=wrky dna-binding protein 19	5.44757e-16	64	82.8037	96
all-unigene003125	381	gi|338819811	y5738_arath ame: full=btb poz domain-containing protein at5g67385	1e-05	53	33.4982	58
all-unigene003126	294	gi|4432794	transposon en spm sub-class	1.51217e-28	85	80.1073	55
all-unigene003128	369	gi|21952510	rna-directed dna polymerase (reverse transcriptase)-related family protein	2.52649e-16	63	84.3445	97
all-unigene003129	283	gi|357453959	pleckstrin and lipid-binding start domains-containing protein isoform 1	1.01276e-07	76	57.7658	38
all-unigene003130	227	gi|357453959	pleckstrin homology and lipid-binding start domain-containing protein	5.95377e-08	82	57.7658	34
all-unigene003132	510	gi|75171613	pp431_arath ame: full=pentatricopeptide repeat-containing protein chloroplastic ame: full=protein chlororespiratory reduction 21 flags: precursor	2.08171e-74	91	277.715	168
all-unigene003133	444	gi|75174769	ppr42_arath ame: full= pentatricopeptide repeat-containing protein at1g13800	1.07688e-26	64	118.627	138
all-unigene003134	525	gi|60392921	pol2_mouse ame: full=retrovirus-related pol polyprotein line-1 ame: full=long interspersed element-1 short=l1 includes: ame: full=reverse transcriptase includes: ame: full=endonuclease	1.61616e-61	81	234.958	175
all-unigene003135	509	gi|281185489	y1518_arath ame: full=probable lrr receptor-like serine threonine-protein kinase at1g51860 flags: precursor	4.45025e-45	73	180.259	154
all-unigene003136	258	gi|34395718	glpq1_arath ame: full=probable glycerophosphoryl diester phosphodiesterase 1 flags: precursor	3.68895e-12	80	70.0922	41
all-unigene003137	313	gi|334302851	rlp12_arath ame: full=receptor-like protein 12 short= 12 flags: precursor	1.67512e-12	58	71.2478	97
all-unigene003139	292	gi|62286891	kasm_arath ame: full=3-oxoacyl- mitochondrial ame: full=beta-ketoacyl-acp synthase ame: full=mtkas flags: precursor	2.01661e-18	76	90.8929	68
all-unigene003140	535	gi|27923894	zfp1_arath ame: full=zinc finger protein 1	2.55771e-65	79	247.669	179
all-unigene003141	526	gi|75318353	skp2b_arath ame: full=f-box protein skp2b ame: full=f-box lrr-repeat protein 5 short= 5 ame: full=skp2-like protein 2 short= 2 2	1e-05	47	46.9802	106
all-unigene003142	463	gi|82082659	wls_chick ame: full=protein wntless homolog ame: full=integral membrane protein gpr177 flags: precursor	1e-05	38	38.891	127
all-unigene003143	251	gi|89274223	hypothetical protein 23.t00068	1.33203e-10	59	63.1586	81
all-unigene003144	297	gi|224072669	predicted protein	7.53579e-09	88	60.8474	34
all-unigene003145	538	gi|30172982	cnd3_xenla ame: full=condensin complex subunit 3 ame: full=chromosome assembly protein xcap-g ame: full=chromosome-associated protein g ame: full=condensin subunit cap-g ame: full=non-smc condensin i complex subunit g	1e-05	68	41.9726	48
all-unigene003146	377	gi|74690321	yd156_klula ame: full=wd repeat-containing protein klla0c16533g	1e-05	47	41.9726	85
all-unigene003149	318	gi|3540192	ribonuclease h-like protein	1.62509e-07	47	56.6102	89
all-unigene003150	248	gi|125987635	rnhx1_arath ame: full= ribonuclease h protein at1g65750	1e-05	52	41.9726	59
all-unigene003151	450	gi|20138030	exp13_arath ame: full=expansin-a13 short= 13 ame: full=alpha-expansin-13 short=at-exp13 short= x13 ame: full=ath- lpha- flags: precursor	3.98909e-48	100	189.889	95
all-unigene003152	306	gi|75262243	c3h14_arath ame: full=zinc finger ccch domain-containing protein 14 short= 3h14	2.66735e-42	91	170.244	90
all-unigene003153	211	gi|482558161	gamma-tubulin complex component 3 homolog	4.18071e-18	95	87.0409	68
all-unigene003155	503	gi|15241484	uncharacterized protein	7.32734e-30	73	119.398	123
all-unigene003156	309	gi|119712	extn_maize ame: full=extensin ame: full=proline-rich glycoprotein flags: precursor	1e-05	49	37.3502	57
all-unigene003158	208	gi|74842561	y13p2_plaf7 ame: full=uncharacterized protein	1e-05	56	34.2686	48
all-unigene003159	362	gi|296439819	snl2_arath ame: full=paired amphipathic helix protein sin3-like 2	1e-05	53	33.113	43
all-unigene003161	581	gi|75171127	dar6_arath ame: full=protein da1-related 6	4.4156e-72	78	270.396	201
all-unigene003162	457	gi|28380156	syp61_arath ame: full=syntaxin-61 short= 61 ame: full=osmotic stress-sensitive mutant 1	6.19077e-31	91	132.88	72
all-unigene003163	277	gi|75264545	sus3_arath ame: full=sucrose synthase 3 short= 3 ame: full=sucrose-udp glucosyltransferase 3	3.05833e-30	77	130.183	92
all-unigene003165	294	gi|334302851	rlp12_arath ame: full=receptor-like protein 12 short= 12 flags: precursor	1.77074e-06	61	51.2174	67
all-unigene003166	261	gi|75098809	pp350_arath ame: full=pentatricopeptide repeat-containing protein chloroplastic flags: precursor	6.91904e-19	97	92.4337	43
all-unigene003167	484	gi|387169508	pol polyprotein	1.96589e-20	58	61.2326	97
all-unigene003168	726	gi|83287833	lpat5_arath ame: full=probable 1-acyl-sn-glycerol-3-phosphate acyltransferase 5 ame: full=lysophosphatidyl acyltransferase 5	7.61359e-27	86	75.8702	45
all-unigene003169	649	gi|83287833	lpat5_arath ame: full=probable 1-acyl-sn-glycerol-3-phosphate acyltransferase 5 ame: full=lysophosphatidyl acyltransferase 5	7.88206e-27	86	75.8702	45
all-unigene003170	468	gi|46577494	zbtb6_mouse ame: full=zinc finger and btb domain-containing protein 6 ame: full=zinc finger protein 482	1e-05	54	33.4982	64
all-unigene003172	606	gi|146286094	copg_arath ame: full=coatomer subunit gamma ame: full=gamma-coat protein short=gamma-cop	8.52468e-15	75	69.707	57
all-unigene003178	284	gi|75223263	hs147_arath ame: full= kda heat shock protein short=	1e-05	51	34.2686	62
all-unigene003180	468	gi|317373559	cd11a_human ame: full=cyclin-dependent kinase 11a ame: full=cell division cycle 2-like protein kinase 2 ame: full=cell division protein kinase 11a ame: full=galactosyltransferase-associated protein kinase p58 gta ame: full=pitslre serine threonine-protein kinase cdc2l2	1e-05	44	35.4242	129
all-unigene003182	366	gi|334302815	ha22g_arath ame: full= hva22-like protein g short= 22g	3.3777e-37	91	153.295	94
all-unigene003183	719	gi|75331123	waklj_arath ame: full=wall-associated receptor kinase-like 10 flags: precursor	5.81874e-60	68	230.72	210
all-unigene003184	381	gi|75162482	qsox1_arath ame: full=sulfhydryl oxidase 1 ame: full=quiescin-sulfhydryl oxidase 1 short= 1 flags: precursor	5.67314e-29	92	125.946	76
all-unigene003185	605	gi|29337243	mth7_drome ame: full=probable g-protein coupled receptor mth-like 7 ame: full=protein methuselah-like 7 flags: precursor	1e-05	63	35.039	41
all-unigene003186	930	gi|29337243	mth7_drome ame: full=probable g-protein coupled receptor mth-like 7 ame: full=protein methuselah-like 7 flags: precursor	1e-05	63	35.039	41
all-unigene003187	815	gi|29337243	mth7_drome ame: full=probable g-protein coupled receptor mth-like 7 ame: full=protein methuselah-like 7 flags: precursor	1e-05	63	35.039	41
all-unigene003193	260	gi|46395964	drl19_arath ame: full= disease resistance protein at1g63350	1.48606e-29	79	127.872	86
all-unigene003194	262	gi|15236287	glycosylation enzyme	5.73941e-13	75	72.0182	53
all-unigene003195	669	gi|82061579	polg_pvcv1 ame: full=genome polyprotein contains: ame: full=movement protein short=mp contains: ame: full=capsid protein short=cp contains: ame: full=aspartic protease short=pr contains: ame: full=reverse transcriptase short=rt	3.24634e-06	41	51.9878	153
all-unigene003196	668	gi|81991105	capsd_cylcv ame: full=capsid protein short=cp ame: full=coat protein	1e-05	56	41.9726	65
all-unigene003198	303	gi|186495296	leucine-rich repeat family protein	5.02813e-21	80	96.6709	60
all-unigene003200	229	gi|117765	cy11_soltu ame: full=cytochrome c1- heme mitochondrial ame: full=complex iii subunit 4-1 ame: full=complex iii subunit iv-1 ame: full=cytochrome b-c1 complex subunit 4-1 ame: full=ubiquinol-cytochrome-c reductase complex cytochrome c1 subunit 1 short=cytochrome c-1-1 flags: precursor	7.12668e-08	61	55.8398	47
all-unigene003203	247	gi|74628362	swf1_neucr ame: full=palmitoyltransferase swf1	1e-05	56	33.8834	48
all-unigene003204	204	gi|56749666	rir1_arath ame: full=ribonucleoside-diphosphate reductase large subunit ame: full=ribonucleoside-diphosphate reductase r1 subunit short= 1	2.41402e-27	94	120.553	68
all-unigene003205	221	gi|357485203	hypothetical protein MTR_5g030170	6.98066e-08	56	54.6842	69
all-unigene003209	304	gi|68052837	matk_partt ame: full=maturase k ame: full=intron maturase	1e-05	50	33.113	54
all-unigene003212	208	gi|75332091	hdg2_arath ame: full=homeobox-leucine zipper protein hdg2 ame: full=hd-zip protein hdg2 ame: full=homeodomain glabra 2-like protein 2 ame: full=homeodomain transcription factor hdg2 ame: full=protein homeodomain glabrous 2	2.49639e-16	75	83.9593	66
all-unigene003215	715	gi|75308849	y3236_arath ame: full=ankyrin repeat-containing protein at3g12360	1e-05	41	44.2838	174
all-unigene003216	754	gi|75313899	al2b4_arath ame: full=aldehyde dehydrogenase family 2 member mitochondrial short=aldh2a flags: precursor	1e-05	77	44.2838	40
all-unigene003218	217	gi|57012586	ha22k_arath ame: full=hva22-like protein k short= 22k	8.23526e-12	92	68.9366	39
all-unigene003219	568	gi|75099847	pp195_arath ame: full=pentatricopeptide repeat-containing protein at2g39620	1.14188e-77	85	288.886	189
all-unigene003220	325	gi|296439504	co1a1_human ame: full=collagen alpha-1 chain ame: full=alpha-1 type i collagen flags: precursor	9.3416e-24	80	108.612	65
all-unigene003223	215	gi|158578531	copia-like pol polyprotein	4.36419e-15	84	78.1814	58
all-unigene003224	304	gi|75171549	fro5_arath ame: full=ferric reduction oxidase 5 short= 5 ame: full=ferric-chelate reductase 5	5.04708e-41	86	166.007	99
all-unigene003225	415	gi|75173189	sps2_arath ame: full=probable sucrose-phosphate synthase 2 ame: full=protein kaonashi 2 ame: full=sucrose-phosphate synthase 2f short= 2f ame: full=sucrose-phosphate synthase short= ame: full=udp-glucose-fructose-phosphate glucosyltransferase	9.626e-37	81	151.754	92
all-unigene003230	216	gi|75311178	f6h1_arath ame: full=feruloyl ortho-hydroxylase 1	3.03106e-06	76	50.447	38
all-unigene003229	401	gi|83288431	pxk_rat ame: full=px domain-containing protein kinase-like protein ame: full=modulator of -atpase short=mo	1e-05	40	32.3426	54
all-unigene003231	392	gi|229891460	pp220_asfm2 ame: full=polyprotein pp220 ame: full=220 kda polyprotein contains: ame: full=p34 contains: ame: full=p14 contains: ame: full=p37 contains: ame: full=p150 flags: precursor	1e-05	59	33.113	52
all-unigene003232	476	gi|15238266	enhancer of polycomb-like transcription factor protein	5.20874e-07	80	56.9954	41
all-unigene003237	240	gi|297820602	c2h2 and c2hc zinc finger-containing protein	2.42925e-23	86	98.5969	81
all-unigene003235	543	gi|75207492	cx5b2_arath ame: full=cytochrome c oxidase subunit 5b- mitochondrial short= 5b-2 flags: precursor	9.79973e-20	60	96.2857	113
all-unigene003238	528	gi|75170994	rs33_arath ame: full=40s ribosomal protein s3-3	9.3616e-41	87	166.007	97
all-unigene003241	548	gi|3123127	yf1m_caeel ame: full=uncharacterized protein flags: precursor	1e-05	57	34.2686	71
all-unigene003243	621	gi|1723247	fkbph_schpo ame: full=probable peptidyl-prolyl cis-trans isomerase short=ppiase ame: full=rotamase	1e-05	45	42.3578	142
all-unigene003244	312	gi|75334139	rbg3_arath ame: full=glycine-rich rna-binding protein mitochondrial short= -rbp3 ame: full= 3 ame: full=mitochondrial rna-binding protein 2a short=at-mrbp2a flags: precursor	1e-05	62	45.0542	50
all-unigene003245	272	gi|297836190	calmodulin-binding protein	4.45247e-09	83	60.4622	36
all-unigene003250	499	gi|130582	polx_tobac ame: full=retrovirus-related pol polyprotein from transposon tnt 1-94 includes: ame: full=protease includes: ame: full=reverse transcriptase includes: ame: full=endonuclease	8.23892e-49	73	192.586	163
all-unigene003254	315	gi|75264246	sne_arath ame: full=f-box protein sne ame: full=protein sneezy ame: full=sleepy protein 2	2.66546e-10	67	63.929	55
all-unigene003255	452	gi|75264246	sne_arath ame: full=f-box protein sne ame: full=protein sneezy ame: full=sleepy protein 2	5.69577e-50	95	196.052	104
all-unigene003251	503	gi|75304717	inv4_arath ame: full=beta- insoluble isoenzyme cwinv4 ame: full=beta-fructofuranosidase 6 short= ruct6 ame: full=cell wall beta-fructosidase 4 ame: full=cell wall invertase 4 short= 4 ame: full=sucrose hydrolase 4 flags: precursor	6.12955e-92	95	335.88	166
all-unigene003253	345	gi|374095396	fbk16_arath ame: full= f-box kelch-repeat protein at1g27420	5.02671e-25	89	112.849	57
all-unigene003256	326	gi|75107724	pub21_arath ame: full=u-box domain-containing protein 21 ame: full=plant u-box protein 21	3.21066e-24	81	110.153	72
all-unigene003257	281	gi|81879853	mfsd5_mouse ame: full=major facilitator superfamily domain-containing protein 5	1.04925e-14	64	78.5666	74
all-unigene003259	264	gi|334302851	rlp12_arath ame: full=receptor-like protein 12 short= 12 flags: precursor	1e-05	48	37.7354	45
all-unigene003260	285	gi|482553770	probable mitochondrial chaperone bcs1-b-like	6.99395e-32	96	125.176	61
all-unigene003266	326	gi|172045742	pub3_arath ame: full=u-box domain-containing protein 3 ame: full=plant u-box protein 3	1.3458e-30	100	131.339	66
all-unigene003262	237	gi|126565	lv301_human ame: full=ig lambda chain v-iii region sh	9.89926e-21	96	98.5969	51
all-unigene003265	410	gi|73921222	nipa_ponab ame: full=nuclear-interacting partner of alk ame: full=nuclear-interacting partner of anaplastic lymphoma kinase ame: full=zinc finger c3hc-type protein 1	1e-05	43	38.1206	55
all-unigene003267	519	gi|89257690	uncharacterized loc101222282	1.96445e-27	74	112.849	95
all-unigene003268	349	gi|332278189	ky_human ame: full=kyphoscoliosis peptidase	1e-05	46	32.7278	62
all-unigene003270	448	gi|544358	kdsr_human ame: full=3-ketodihydrosphingosine reductase short=kds reductase ame: full=3-dehydrosphinganine reductase ame: full=follicular variant translocation protein 1 short=fvt-1 flags: precursor	6.13827e-14	58	55.0694	78
all-unigene003271	256	gi|75165124	sps1_arath ame: full=sucrose-phosphate synthase 1 ame: full=sucrose-phosphate synthase 1f short= 1f ame: full=sucrose-phosphate synthase short= ame: full=udp-glucose-fructose-phosphate glucosyltransferase	4.19144e-32	84	136.346	85
all-unigene003275	363	gi|11994683	hat dimerization domain-containing protein	1.0565e-08	79	61.6178	44
all-unigene003277	257	gi|75337836	nfxl1_arath ame: full=nf-x1-type zinc finger protein nfxl1 short= 1	1e-05	53	38.891	66
all-unigene003278	350	gi|152126068	6pgl2_arath ame: full=probable 6-phosphogluconolactonase 2 short=6pgl 2	1.44913e-32	93	137.887	73
all-unigene003279	346	gi|482551694	tetratricopeptide repeat domain-containing protein	3.94566e-44	93	164.466	86
all-unigene003280	284	gi|9294245	tnp2-like transposon protein	3.6837e-27	95	95.9005	46
all-unigene003281	240	gi|15219407	uncharacterized protein	5.42046e-25	87	103.605	58
all-unigene003282	958	gi|75180186	ppr20_arath ame: full=pentatricopeptide repeat-containing protein mitochondrial flags: precursor	1.86793e-28	91	126.716	70
all-unigene003283	272	gi|141475	ytx2_xenla ame: full=transposon tx1 uncharacterized 149 kda protein ame: full=orf 2	8.98924e-06	65	48.9062	61
all-unigene003284	260	gi|190360103	r1ab_brv1 ame: full=replicase polyprotein 1ab short=pp1ab ame: full=orf1ab polyprotein contains: ame: full=non-structural protein 1 short=nsp1 ame: full=papain-like proteinase short=pl-pro contains: ame: full=non-structural protein 2 short=nsp2 contains: ame: full=3c-like serine proteinase short=3clsp ame: full=m-pro ame: full=nsp3 ame: full=p27 contains: ame: full=non-structural protein 4 short=…	1e-05	60	33.113	50
all-unigene003286	336	gi|75247687	fb121_arath ame: full=f-box protein at2g32560	1e-05	42	32.3426	49
all-unigene003287	296	gi|119368340	harb1_bovin ame: full= nuclease harbi1 ame: full=harbinger transposase-derived nuclease	1e-05	48	36.965	87
all-unigene003288	383	gi|81869923	pmfbp_mouse ame: full=polyamine-modulated factor 1-binding protein 1 short=pmf-1-binding protein ame: full=sperm tail-associated protein	1e-05	49	39.2762	121
all-unigene003290	289	gi|218512104	atm_debha ame: full=serine threonine-protein kinase tel1 ame: full=atm homolog ame: full=dna-damage checkpoint kinase tel1 ame: full=telomere length regulation protein 1	1e-05	53	38.5058	63
all-unigene003291	440	gi|68565924	nudt2_arath ame: full=nudix hydrolase 2 short= 2 ame: full=adp-ribose pyrophosphatase ame: full=nadh pyrophosphatase	4.56244e-09	80	60.077	47
all-unigene003294	212	gi|141475	ytx2_xenla ame: full=transposon tx1 uncharacterized 149 kda protein ame: full=orf 2	1e-05	57	38.5058	68
all-unigene003293	429	gi|297821767	protein	8.15036e-27	52	112.079	191
all-unigene003297	393	gi|74625017	yli2_schpo ame: full=uncharacterized protein	1e-05	64	32.3426	53
all-unigene003302	865	gi|75171768	uvr8_arath ame: full=ultraviolet-b receptor uvr8 ame: full=protein uv-b resistance 8 ame: full=rcc1 domain-containing protein uvr8	9.38268e-21	43	100.908	234
all-unigene003301	381	gi|22655202	retroelement pol polyprotein	1.37384e-17	62	87.8113	128
all-unigene003305	371	gi|187653897	tcp18_arath ame: full=transcription factor tcp18 ame: full=protein branched 1 ame: full=protein teosinte branched 1-like 1	4.12397e-27	82	119.783	74
all-unigene003306	366	gi|2464914	probable polyol transporter 3-like	6.09888e-33	84	123.25	97
all-unigene003310	661	gi|134034966	yg31b_yeast ame: full=transposon ty3-g gag-pol polyprotein ame: full=gag3-pol3 ame: full=transposon ty3-1 tya-tyb polyprotein contains: ame: full=capsid protein short=ca ame: full=p24 contains: ame: full=spacer peptide p3 contains: ame: full=nucleocapsid protein p11 short=nc contains: ame: full=ty3 protease short=pr ame: full=p16 contains: ame: full=spacer peptide j contains: ame: full=reverse tr…	1e-05	62	38.5058	37
all-unigene003309	444	gi|119139	ef1a3_muccl ame: full=elongation factor 1-alpha short=ef-1-alpha	1e-05	46	33.113	67
all-unigene003311	450	gi|75098688	pp127_arath ame: full= pentatricopeptide repeat-containing protein mitochondrial flags: precursor	7.74916e-60	81	228.794	152
all-unigene003312	1081	gi|109893656	rh31_arath ame: full=dead-box atp-dependent rna helicase 31	0	94	660.218	359
all-unigene003313	242	gi|297810745	polyketide cyclase dehydrase and lipid transport superfamily protein	3.5753e-10	94	63.929	36
all-unigene003314	203	gi|482573862	hypothetical protein CARUB_v10009518mg	3.99001e-08	85	56.9954	35
all-unigene003315	444	gi|341942108	srrm2_mouse ame: full=serine arginine repetitive matrix protein 2	1e-05	44	36.1946	96
all-unigene003316	403	gi|44888535	rpgr1_mouse ame: full=x-linked retinitis pigmentosa gtpase regulator-interacting protein 1 short=rpgr-interacting protein 1	1e-05	51	39.6614	90
all-unigene003318	286	gi|297797371	hypothetical protein ARALYDRAFT_919665	2.48978e-08	86	56.6102	36
all-unigene003319	346	gi|130582	polx_tobac ame: full=retrovirus-related pol polyprotein from transposon tnt 1-94 includes: ame: full=protease includes: ame: full=reverse transcriptase includes: ame: full=endonuclease	3.14853e-27	64	120.168	110
all-unigene003320	512	gi|75337277	pla13_arath ame: full=phospholipase a1- chloroplastic flags: precursor	6.0428e-82	91	302.753	169
all-unigene003321	285	gi|75171557	makr5_arath ame: full=probable membrane-associated kinase regulator 5	3.7198e-12	71	70.0922	64
all-unigene003323	403	gi|108935889	rs2_bovin ame: full=40s ribosomal protein s2	7.66873e-66	100	248.44	120
all-unigene003324	416	gi|297820390	pap oas1 substrate-binding domain-containing protein	1.27289e-11	90	70.4774	61
all-unigene003325	535	gi|27735258	sytm_arath ame: full=threonine--trna mitochondrial ame: full=threonyl-trna synthetase short= flags: precursor	1.8122e-56	79	127.487	87
all-unigene003326	459	gi|27735258	sytm_arath ame: full=threonine--trna mitochondrial ame: full=threonyl-trna synthetase short= flags: precursor	4.39563e-61	81	233.032	152
all-unigene003327	335	gi|67461582	spl15_arath ame: full=squamosa promoter-binding-like protein 15	4.75339e-23	65	106.301	90
all-unigene003328	256	gi|122167221	psbq_orysj ame: full=oxygen-evolving enhancer protein chloroplastic short=oee3 ame: full=lp02 flags: precursor	6.06648e-23	73	105.916	84
all-unigene003330	207	gi|297793051	hypothetical protein ARALYDRAFT_357817	3.38638e-15	94	78.9518	39
all-unigene003331	241	gi|75299756	rgs1_arath ame: full=regulator of g-protein signaling 1 short= 1 ame: full= uncharacterized protein at3g26090	1.6254e-15	69	81.2629	56
[truncated: 117,028 more rows]

## Sheet: 2
Additional file 5.2: Complete list of all-unigenes with PlanTFDB annotations
Query ID	Query length	Subject ID	Subject annotation	E-value	Similarity	Score	Alignment length
all-unigene000454	312	Ath017239	Ath017239|Arabidopsis_thaliana|bHLH|AT2G31220.1;NM_128678	1e-14	82.42	75.5	312
all-unigene000489	785	Ath008809	Ath008809|Arabidopsis_thaliana|NAC|AT1G64100.2;NM_001084301	2.50001e-11	28.0787	100.375	785
all-unigene013765	376	Zma029771	Zma029771|Zea_mays|MYB_related|GRMZM2G101806_T01	5e-09	26.5	56.6	376
all-unigene015141	225	Mgu011804	Mgu011804|Mimulus_guttatus|S1Fa-like|mgf019748m	3.25e-07	38.7	51.4	225
all-unigene015442	233	Bna017752	Bna017752|Brassica_napus|HB-other|PUT-173a-Brassica_napus-79730	3e-41	100	163	233
all-unigene015591	1464	Osj032659	Osj032659|Oryza_sativa_subsp._japonica|bZIP|NM_001072729	8e-59	30.035	121.9	1464
all-unigene000220	440	Ath020877	Ath020877|Arabidopsis_thaliana|bHLH|AT5G53210.1;NM_124700	2e-41	75.54	164	440
all-unigene000265	378	Bdi014787	Bdi014787|Brachypodium_distachyon|G2-like|Bradi1g36240.1	8e-22	43.55	99	378
all-unigene000816	617	Osj032659	Osj032659|Oryza_sativa_subsp._japonica|bZIP|NM_001072729	2e-36	38.05	149	617
all-unigene000965	286	Vvi022854	Vvi022854|Vitis_vinifera|M-type|GSVIVT00006101001	1e-22	58.7	101	286
all-unigene001158	525	Ath008809	Ath008809|Arabidopsis_thaliana|NAC|AT1G64100.2;NM_001084301	1.11111e-10	30.0578	90.1556	525
all-unigene001304	660	Osj032659	Osj032659|Oryza_sativa_subsp._japonica|bZIP|NM_001072729	1e-29	31.6	127	660
all-unigene001509	308	Ath008809	Ath008809|Arabidopsis_thaliana|NAC|AT1G64100.2;NM_001084301	6.90015e-07	34.698	66.69	308
all-unigene001535	811	Osj032489	Osj032489|Oryza_sativa_subsp._japonica|WRKY|NM_001075009	6e-41	39.57	164	811
all-unigene001563	379	Osj032659	Osj032659|Oryza_sativa_subsp._japonica|bZIP|NM_001072729	5e-14	32.76	73.2	379
all-unigene001983	403	Rsa002016	Rsa002016|Raphanus_sativus|B3|PUT-163a-Raphanus_sativus-4894;gnl|UG|Rsa#S42044253	3e-24	49.62	107	403
all-unigene002627	316	Mtr023905	Mtr023905|Medicago_truncatula|WRKY|IMGA|AC202489_11.1	9e-13	41.49	68.9	316
all-unigene002869	244	Osj032659	Osj032659|Oryza_sativa_subsp._japonica|bZIP|NM_001072729	8e-16	50.78	49.65	244
all-unigene003237	240	Aly025522	Aly025522|Arabidopsis_lyrata|C2H2|fgenesh2_kg.5__2251__AT3G58070.1	2e-23	66.67	103	240
all-unigene003733	214	Ath021330	Ath021330|Arabidopsis_thaliana|NAC|AT1G25580.1;NM_102369	4e-08	55.56	53.5	214
all-unigene003947	305	Osj050499	Osj050499|Oryza_sativa_subsp._japonica|NF-YA|NM_001054820	8e-09	33.65	55.8	305
all-unigene004663	265	Ath025767	Ath025767|Arabidopsis_thaliana|bHLH|AT3G21330.1;NM_113028	6e-41	97.65	162	265
all-unigene005087	348	Osi034216	Osi034216|Oryza_sativa_subsp._indica|C3H|BGIOSGA023566-TA	8e-11	34.65	62.4	348
all-unigene005699	382	Aly008698	Aly008698|Arabidopsis_lyrata|Dof|Al_scaffold_0001_706	2e-28	67.14	120	382
all-unigene005721	380	Osj032659	Osj032659|Oryza_sativa_subsp._japonica|bZIP|NM_001072729	2e-13	36.175	45.65	380
all-unigene005790	210	Zma010212	Zma010212|Zea_mays|ZF-HD|GRMZM2G462417_T01	6e-06	38.46	46.2	210
all-unigene005991	259	Zma013210	Zma013210|Zea_mays|NAC|GRMZM2G312201_T01	2e-10	37.8	61.2	259
all-unigene006537	330	Zma013210	Zma013210|Zea_mays|NAC|GRMZM2G312201_T01	3.43333e-11	35.0833	70.8667	330
all-unigene006598	375	Vvi022854	Vvi022854|Vitis_vinifera|M-type|GSVIVT00006101001	8e-20	39.68	92.4	375
all-unigene006599	246	Vvi022780	Vvi022780|Vitis_vinifera|Trihelix|GSVIVT00038528001	2e-17	48.05	84.3	246
all-unigene007224	223	Bdi016129	Bdi016129|Brachypodium_distachyon|MYB_related|Bradi2g00420.1	2e-10	40.54	61.2	223
all-unigene007829	288	Mgu011804	Mgu011804|Mimulus_guttatus|S1Fa-like|mgf019748m	1.12505e-06	37.84	52.45	288
all-unigene008039	501	Ath019034	Ath019034|Arabidopsis_thaliana|ERF|AT1G71520.1;NM_105820	2e-56	78.72	215	501
all-unigene009537	267	Aly013463	Aly013463|Arabidopsis_lyrata|MYB|fgenesh2_kg.7__2173__AT4G21440.1	2e-23	63.64	103	267
all-unigene010683	312	Osj055517	Osj055517|Oryza_sativa_subsp._japonica|Nin-like|LOC_Os06g12360.1	4e-14	37.5	73.6	312
all-unigene011827	698	Osj032489	Osj032489|Oryza_sativa_subsp._japonica|WRKY|NM_001075009	8e-17	30.41	84.3	698
all-unigene013573	307	Vvi022854	Vvi022854|Vitis_vinifera|M-type|GSVIVT00006101001	4e-16	44.66	80.1	307
all-unigene014387	235	Osj032659	Osj032659|Oryza_sativa_subsp._japonica|bZIP|NM_001072729	2e-12	48.53	68.2	235
all-unigene014523	218	Aly012302	Aly012302|Arabidopsis_lyrata|G2-like|fgenesh1_pm.C_scaffold_4001775	3e-16	71.43	80.5	218
all-unigene014799	277	Osj032659	Osj032659|Oryza_sativa_subsp._japonica|bZIP|NM_001072729	9e-15	37.93	75.5	277
all-unigene014848	519	Zma013210	Zma013210|Zea_mays|NAC|GRMZM2G312201_T01	2.25e-08	31.045	74.725	519
all-unigene014889	236	Zma013210	Zma013210|Zea_mays|NAC|GRMZM2G312201_T01	3.525e-06	34.3725	48.125	236
all-unigene014991	510	Ath030085	Ath030085|Arabidopsis_thaliana|WRKY|AT4G12020.2;NM_001125496	5e-22	34.08	100	510
all-unigene015016	375	Vvi009945	Vvi009945|Vitis_vinifera|C2H2|XM_002275364	1e-12	31.62	68.6	375
all-unigene015087	280	Vvi004072	Vvi004072|Vitis_vinifera|GRAS|XM_002267520	3e-13	40.86	70.5	280
all-unigene015095	442	Zma010212	Zma010212|Zea_mays|ZF-HD|GRMZM2G462417_T01	1.06667e-09	36.54	86.4667	442
all-unigene015211	448	Osj050499	Osj050499|Oryza_sativa_subsp._japonica|NF-YA|NM_001054820	2e-30	45.67	128	448
all-unigene015225	216	Rsa002102	Rsa002102|Raphanus_sativus|C2H2|PUT-163a-Raphanus_sativus-7507;gnl|UG|Rsa#S42000156	6e-27	75	115	216
all-unigene015266	442	Vvi004072	Vvi004072|Vitis_vinifera|GRAS|XM_002267520	3e-14	40.29	74.3	442
all-unigene015281	824	Osj032659	Osj032659|Oryza_sativa_subsp._japonica|bZIP|NM_001072729	1e-34	38.57	61.1	824
all-unigene015289	401	Ath028097	Ath028097|Arabidopsis_thaliana|C2H2|AT4G02670.1;NM_116501	5e-40	74.64	159	401
all-unigene015309	206	Zma055439	Zma055439|Zea_mays|MYB_related|NM_001138118	4e-06	32.84	47	206
all-unigene015310	340	Osj032659	Osj032659|Oryza_sativa_subsp._japonica|bZIP|NM_001072729	5e-11	34.69	63.2	340
all-unigene015319	320	Bdi016129	Bdi016129|Brachypodium_distachyon|MYB_related|Bradi2g00420.1	7e-10	32.04	59.3	320
all-unigene015354	291	Vvi022780	Vvi022780|Vitis_vinifera|Trihelix|GSVIVT00038528001	2e-17	43.3	84.3	291
all-unigene015390	359	Vvi010570	Vvi010570|Vitis_vinifera|LBD|GSVIVT00020863001	1e-10	28.93	62	359
all-unigene015403	414	Zma013210	Zma013210|Zea_mays|NAC|GRMZM2G312201_T01	5e-08	40.13	66.45	414
all-unigene015421	380	Bna022637	Bna022637|Brassica_napus|NAC|PUT-173a-Brassica_napus-21608	2e-67	91.47	250	380
all-unigene015475	302	Bdi015813	Bdi015813|Brachypodium_distachyon|C2H2|Bradi3g01490.1	1.001e-06	30.21	52.95	302
all-unigene015486	666	Bdi010526	Bdi010526|Brachypodium_distachyon|Nin-like|Bradi1g45170.1	1.50002e-14	32.21	84.15	666
all-unigene015617	363	Ath030085	Ath030085|Arabidopsis_thaliana|WRKY|AT4G12020.2;NM_001125496	1e-50	82.35	194	363
all-unigene000018	1463	Bna001714	Bna001714|Brassica_napus|bZIP|PUT-173a-Brassica_napus-78947;PUT-173a-Brassica_napus-65264;gnl|UG|Bna#S38992949	0	96.46	661	1463
all-unigene000094	323	Mgu011804	Mgu011804|Mimulus_guttatus|S1Fa-like|mgf019748m	3e-09	40.15	58.7667	323
all-unigene000112	348	Osj032659	Osj032659|Oryza_sativa_subsp._japonica|bZIP|NM_001072729	2e-10	31.13	61.2	348
all-unigene000152	281	Vvi004072	Vvi004072|Vitis_vinifera|GRAS|XM_002267520	3e-17	42.86	84	281
all-unigene000157	427	Osj032489	Osj032489|Oryza_sativa_subsp._japonica|WRKY|NM_001075009	4e-24	43.85	107	427
all-unigene000165	352	Zma010212	Zma010212|Zea_mays|ZF-HD|GRMZM2G462417_T01	6e-15	37.17	76.3	352
all-unigene000178	203	Aly004053	Aly004053|Arabidopsis_lyrata|C2H2|fgenesh2_kg.5__1410__AT3G50700.1	5e-09	78.57	56.6	203
all-unigene000320	1029	Zma010212	Zma010212|Zea_mays|ZF-HD|GRMZM2G462417_T01	6.66668e-12	26.0233	103.567	1029
all-unigene000345	671	Ath028521	Ath028521|Arabidopsis_thaliana|FAR1|AT2G32250.2;AT2G32250.4;NM_001124959;NM_201851	3e-103	81.9	371	671
all-unigene000370	265	Tae001339	Tae001339|Triticum_aestivum|NAC|gnl|UG|Ta#S52543988	2e-10	33.33	61.2	265
all-unigene000509	262	Vvi022854	Vvi022854|Vitis_vinifera|M-type|GSVIVT00006101001	3e-21	60.27	97.1	262
all-unigene000513	324	Zma010212	Zma010212|Zea_mays|ZF-HD|GRMZM2G462417_T01	3.5e-08	35.8	66.05	324
all-unigene000549	324	Osj000843	Osj000843|Oryza_sativa_subsp._japonica|G2-like|NM_001057333	3e-06	35.71	47.4	324
all-unigene000611	244	Vvi022854	Vvi022854|Vitis_vinifera|M-type|GSVIVT00006101001	5e-16	48.78	79.7	244
all-unigene000678	246	Ath008809	Ath008809|Arabidopsis_thaliana|NAC|AT1G64100.2;NM_001084301	1.23969e-06	32.7442	53.5917	246
all-unigene000679	275	Cpa019405	Cpa019405|Carica_papaya|ERF|evm.TU.contig_30133.1	6e-18	72.5	53.35	275
all-unigene000680	339	Osj050499	Osj050499|Oryza_sativa_subsp._japonica|NF-YA|NM_001054820	7e-07	33.04	49.3	339
all-unigene000782	403	Mtr005217	Mtr005217|Medicago_truncatula|MYB_related|IMGA|MEDTR3G163370.1	9e-10	33.87	59.3	403
all-unigene000879	346	Bna006164	Bna006164|Brassica_napus|bHLH|PUT-173a-Brassica_napus-134853;gnl|UG|Bna#S39172678	1e-42	75.65	167	346
all-unigene000900	395	Osj032489	Osj032489|Oryza_sativa_subsp._japonica|WRKY|NM_001075009	1e-17	36.66	54.1	395
all-unigene000925	226	Tae001339	Tae001339|Triticum_aestivum|NAC|gnl|UG|Ta#S52543988	1e-16	48.65	81.6	226
all-unigene000930	428	Osj032659	Osj032659|Oryza_sativa_subsp._japonica|bZIP|NM_001072729	2e-19	34.33	91.3	428
all-unigene001005	302	Osj055517	Osj055517|Oryza_sativa_subsp._japonica|Nin-like|LOC_Os06g12360.1	3.005e-06	31.23	50.65	302
all-unigene001063	452	Vvi018326	Vvi018326|Vitis_vinifera|bZIP|GSVIVT00038115001	3e-07	27.82	51.2	452
all-unigene001103	341	Zma010212	Zma010212|Zea_mays|ZF-HD|GRMZM2G462417_T01	2.00007e-09	34.71	78.1333	341
all-unigene001130	321	Osj032659	Osj032659|Oryza_sativa_subsp._japonica|bZIP|NM_001072729	9e-21	42.72	95.5	321
all-unigene001135	272	Bra006527	Bra006527|Brassica_rapa|MIKC|PUT-171a-Brassica_rapa-37226;gnl|UG|Bra#S52583812	1e-40	98.78	161	272
all-unigene001140	1491	Osj032659	Osj032659|Oryza_sativa_subsp._japonica|bZIP|NM_001072729	3e-47	29.38	186	1491
all-unigene001141	1389	Osj032659	Osj032659|Oryza_sativa_subsp._japonica|bZIP|NM_001072729	2e-39	27.67	160	1389
all-unigene001153	371	Osj032659	Osj032659|Oryza_sativa_subsp._japonica|bZIP|NM_001072729	3e-21	37.9	97.1	371
all-unigene001178	304	Vvi022854	Vvi022854|Vitis_vinifera|M-type|GSVIVT00006101001	5e-21	46.23	96.3	304
all-unigene001286	334	Gma027432	Gma027432|Glycine_max|C3H|Glyma03g02020.1	1e-07	36.52	52	334
all-unigene001321	727	Aly009701	Aly009701|Arabidopsis_lyrata|WRKY|Al_scaffold_0008_414	4e-54	49.12	208	727
all-unigene001350	305	Mgu011804	Mgu011804|Mimulus_guttatus|S1Fa-like|mgf019748m	4e-07	47.705	34.85	305
all-unigene001395	1233	Cpa022412	Cpa022412|Carica_papaya|MYB_related|evm.TU.supercontig_48.68	5e-88	47.98	322	1233
all-unigene001511	220	Bdi014787	Bdi014787|Brachypodium_distachyon|G2-like|Bradi1g36240.1	2e-06	41.79	47.8	220
all-unigene001560	290	Ath008809	Ath008809|Arabidopsis_thaliana|NAC|AT1G64100.2;NM_001084301	1.0993e-07	32.958	66.09	290
all-unigene001564	208	Aly002635	Aly002635|Arabidopsis_lyrata|ERF|scaffold_400172.1	2e-07	44.62	51.2	208
all-unigene001568	489	Zma029771	Zma029771|Zea_mays|MYB_related|GRMZM2G101806_T01	6e-14	29.49	73.9	489
all-unigene001585	913	Ath026453	Ath026453|Arabidopsis_thaliana|WRKY|AT5G45050.2;NM_123873	4e-16	24.8	82.4	913
all-unigene001593	801	Bna008984	Bna008984|Brassica_napus|bHLH|PUT-173a-Brassica_napus-103867;gnl|UG|Bna#S39051456	6e-114	99.56	407	801
all-unigene001609	420	Vvi010570	Vvi010570|Vitis_vinifera|LBD|GSVIVT00020863001	7e-11	29.37	63.2	420
all-unigene001616	250	Osj033711	Osj033711|Oryza_sativa_subsp._japonica|NAC|NM_001068747	7e-07	25.68	49.3	250
all-unigene001649	239	Zma010212	Zma010212|Zea_mays|ZF-HD|GRMZM2G462417_T01	8e-09	36	55.8	239
all-unigene001656	505	Bra008217	Bra008217|Brassica_rapa|E2F/DP|gnl|UG|Bra#S40760880	1e-50	92.03	196	505
all-unigene001713	322	Zma013210	Zma013210|Zea_mays|NAC|GRMZM2G312201_T01	6.002e-10	37.274	76.42	322
all-unigene001722	286	Zma013210	Zma013210|Zea_mays|NAC|GRMZM2G312201_T01	1.6208e-06	33.596	63.38	286
all-unigene001728	516	Osj032659	Osj032659|Oryza_sativa_subsp._japonica|bZIP|NM_001072729	1e-09	27.4	59.7	516
all-unigene001740	428	Zma013210	Zma013210|Zea_mays|NAC|GRMZM2G312201_T01	3.33467e-08	31.0367	64.2	428
all-unigene001742	336	Aly009748	Aly009748|Arabidopsis_lyrata|WRKY|Al_scaffold_0008_399	8e-08	36.27	52.4	336
all-unigene001745	257	Osj032659	Osj032659|Oryza_sativa_subsp._japonica|bZIP|NM_001072729	7e-13	39.29	69.3	257
all-unigene001750	511	Osj032659	Osj032659|Oryza_sativa_subsp._japonica|bZIP|NM_001072729	2e-35	42.94	145	511
all-unigene001755	321	Ath008809	Ath008809|Arabidopsis_thaliana|NAC|AT1G64100.2;NM_001084301	2.5e-06	28.455	47.6	321
all-unigene001767	324	Zma013210	Zma013210|Zea_mays|NAC|GRMZM2G312201_T01	1.34e-06	35.574	69.36	324
all-unigene001773	257	Bdi020164	Bdi020164|Brachypodium_distachyon|bHLH|Bradi4g32930.1	3e-12	38.37	67.4	257
all-unigene001776	323	Ath011148	Ath011148|Arabidopsis_thaliana|MYB|AT2G47460.1;NM_130314	8e-35	73.4	142	323
all-unigene001902	994	Sbi021369	Sbi021369|Sorghum_bicolor|FAR1|Sb02g005860;XM_002461595	2.54e-06	33.975	52.2	994
all-unigene001906	1342	Ath008809	Ath008809|Arabidopsis_thaliana|NAC|AT1G64100.2;NM_001084301	1.06045e-11	23.97	75.72	1342
all-unigene001951	242	Bna016078	Bna016078|Brassica_napus|TALE|PUT-173a-Brassica_napus-72781	5e-38	97.5	152	242
all-unigene002002	253	Vvi012188	Vvi012188|Vitis_vinifera|bZIP|XM_002281039	3e-08	41.67	53.9	253
all-unigene002019	202	Ath012000	Ath012000|Arabidopsis_thaliana|HD-ZIP|AT1G05230.3;NM_001123759	7e-31	91.04	129	202
all-unigene002023	374	Aly016663	Aly016663|Arabidopsis_lyrata|C3H|Al_scaffold_0001_4187	7e-21	44.6	95.9	374
all-unigene002065	247	Ghi013563	Ghi013563|Gossypium_hirsutum|S1Fa-like|PUT-165a-Gossypium_hirsutum-55482	5e-07	36.36	49.7	247
all-unigene002113	412	Aly019194	Aly019194|Arabidopsis_lyrata|MYB|fgenesh2_kg.6__1513__AT5G15310.1	3e-44	67.65	174	412
all-unigene002173	737	Ath030085	Ath030085|Arabidopsis_thaliana|WRKY|AT4G12020.2;NM_001125496	6e-09	42.338	58.84	737
all-unigene002321	297	Mtr023905	Mtr023905|Medicago_truncatula|WRKY|IMGA|AC202489_11.1	1e-10	35.05	62	297
all-unigene002529	331	Aly027950	Aly027950|Arabidopsis_lyrata|bHLH|fgenesh1_pm.C_scaffold_1001571	1e-11	37.5	65.5	331
all-unigene002556	459	Aly027950	Aly027950|Arabidopsis_lyrata|bHLH|fgenesh1_pm.C_scaffold_1001571	1e-16	49.15	51.25	459
all-unigene002590	420	Vvi022780	Vvi022780|Vitis_vinifera|Trihelix|GSVIVT00038528001	4e-23	41.43	103	420
all-unigene002591	423	Vvi022780	Vvi022780|Vitis_vinifera|Trihelix|GSVIVT00038528001	3e-22	38.19	100	423
all-unigene002620	976	Osj032659	Osj032659|Oryza_sativa_subsp._japonica|bZIP|NM_001072729	4e-44	34.42	175	976
all-unigene002658	501	Gma043725	Gma043725|Glycine_max|MYB|Glyma20g36600.1	2e-31	47.22	132	501
all-unigene002668	254	Ath021924	Ath021924|Arabidopsis_thaliana|G2-like|AT2G03500.1;NM_126400	1e-36	88.1	148	254
all-unigene002673	258	Csi000059	Csi000059|Citrus_sinensis|C2H2|PUT-167a-Citrus_sinensis-35658;PUT-167a-Citrus_sinensis-3380;gnl|UG|Csi#S22594184;PUT-167a-Citrus_sinensis-35660;PUT-167a-Citrus_sinensis-85106189	9e-42	94.12	165	258
all-unigene002719	842	Aly013445	Aly013445|Arabidopsis_lyrata|WRKY|Al_scaffold_0008_337	3e-12	34.215	95.8	842
all-unigene002745	764	Ath008809	Ath008809|Arabidopsis_thaliana|NAC|AT1G64100.2;NM_001084301	6e-12	21.255	68.55	764
all-unigene002762	363	Mtr023905	Mtr023905|Medicago_truncatula|WRKY|IMGA|AC202489_11.1	3e-18	44.44	87	363
all-unigene002793	294	Mtr027012	Mtr027012|Medicago_truncatula|LBD|IMGA|MEDTR5G092860.1	3e-08	31.91	53.9	294
all-unigene002828	669	Aly009701	Aly009701|Arabidopsis_lyrata|WRKY|Al_scaffold_0008_414	5e-13	34.65	71.6	669
all-unigene002851	338	Bdi015813	Bdi015813|Brachypodium_distachyon|C2H2|Bradi3g01490.1	2e-15	44.64	77.8	338
all-unigene002856	342	Zma040512	Zma040512|Zea_mays|NAC|GRMZM2G312201_T02	1.00015e-11	37.09	70.85	342
all-unigene002858	207	Aly027950	Aly027950|Arabidopsis_lyrata|bHLH|fgenesh1_pm.C_scaffold_1001571	1e-16	57.97	82	207
all-unigene002867	764	Ath006027	Ath006027|Arabidopsis_thaliana|NAC|AT3G17730.1;NM_112654	1e-121	91.87	432	764
all-unigene002871	434	Bna016573	Bna016573|Brassica_napus|MYB|PUT-173a-Brassica_napus-14047	7e-67	86.81	249	434
all-unigene002879	372	Ath005712	Ath005712|Arabidopsis_thaliana|SBP|AT5G50570.1;AT5G50570.2;AT5G50670.1;NM_124435;NM_124445;NM_180830	7e-55	80.8	208	372
all-unigene002880	208	Bna015200	Bna015200|Brassica_napus|NAC|PUT-173a-Brassica_napus-86406	2e-17	71.1	52.35	208
all-unigene002886	430	Bna017880	Bna017880|Brassica_napus|MYB_related|PUT-173a-Brassica_napus-38873	5e-53	79.58	203	430
all-unigene002912	311	Osj032659	Osj032659|Oryza_sativa_subsp._japonica|bZIP|NM_001072729	2e-08	34.95	54.7	311
all-unigene002917	745	Aly013445	Aly013445|Arabidopsis_lyrata|WRKY|Al_scaffold_0008_337	1e-25	32.77	114	745
all-unigene002925	309	Ath030085	Ath030085|Arabidopsis_thaliana|WRKY|AT4G12020.2;NM_001125496	3e-13	43.01	70.5	309
all-unigene002930	588	Aly023027	Aly023027|Arabidopsis_lyrata|ERF|fgenesh2_kg.6__1130__AT5G11590.1	1e-68	84.62	255	588
all-unigene002939	511	Aly019053	Aly019053|Arabidopsis_lyrata|bHLH|fgenesh2_kg.7__2520__AT4G17880.1	4e-43	58.6	171	511
all-unigene002985	798	Ath008275	Ath008275|Arabidopsis_thaliana|WRKY|AT5G45260.1;NM_123894	2.5e-08	34.725	91.75	798
all-unigene003004	445	Ath008809	Ath008809|Arabidopsis_thaliana|NAC|AT1G64100.2;NM_001084301	6.15463e-07	32.4277	82.0846	445
all-unigene003033	254	Mgu011804	Mgu011804|Mimulus_guttatus|S1Fa-like|mgf019748m	3.751e-06	42.9375	49.3	254
all-unigene003065	395	Vvi022780	Vvi022780|Vitis_vinifera|Trihelix|GSVIVT00038528001	2e-35	51.15	144	395
all-unigene003068	411	Ath026453	Ath026453|Arabidopsis_thaliana|WRKY|AT5G45050.2;NM_123873	2e-10	33.04	61.6	411
all-unigene003123	268	Ath030085	Ath030085|Arabidopsis_thaliana|WRKY|AT4G12020.2;NM_001125496	6e-17	43.75	82.8	268
all-unigene003133	444	Ath008809	Ath008809|Arabidopsis_thaliana|NAC|AT1G64100.2;NM_001084301	6.76685e-07	27.9417	60.1667	444
all-unigene003135	509	Vvi004072	Vvi004072|Vitis_vinifera|GRAS|XM_002267520	3e-25	40	111	509
all-unigene003137	313	Ghi013563	Ghi013563|Gossypium_hirsutum|S1Fa-like|PUT-165a-Gossypium_hirsutum-55482	5.001e-07	37.41	54.85	313
all-unigene003140	535	Pth003302	Pth003302|Populus_trichocarpa|C2H2|POPTR_0003s17900.1	6e-26	46.07	114	535
all-unigene003150	248	Osj032659	Osj032659|Oryza_sativa_subsp._japonica|bZIP|NM_001072729	5e-07	30	49.7	248
all-unigene003152	306	Aly013620	Aly013620|Arabidopsis_lyrata|C3H|fgenesh2_kg.2__907__AT1G66810.1	3e-44	90.7	173	306
all-unigene003250	499	Osj050499	Osj050499|Oryza_sativa_subsp._japonica|NF-YA|NM_001054820	4e-51	59.04	197	499
all-unigene003311	450	Zma013210	Zma013210|Zea_mays|NAC|GRMZM2G312201_T01	5.00026e-10	33.2	76.25	450
all-unigene003333	264	Osi036020	Osi036020|Oryza_sativa_subsp._indica|MYB|BGIOSGA030830-TA	2e-17	70.51	52.75	264
all-unigene003381	215	Osj032659	Osj032659|Oryza_sativa_subsp._japonica|bZIP|NM_001072729	5e-11	44.62	63.2	215
all-unigene003501	387	Ath026453	Ath026453|Arabidopsis_thaliana|WRKY|AT5G45050.2;NM_123873	3e-10	31.11	60.8	387
all-unigene003542	330	Osj055517	Osj055517|Oryza_sativa_subsp._japonica|Nin-like|LOC_Os06g12360.1	4e-14	37.74	73.6	330
all-unigene003585	537	Ath008809	Ath008809|Arabidopsis_thaliana|NAC|AT1G64100.2;NM_001084301	2.01022e-11	28.452	81.43	537
all-unigene003635	375	Zma013210	Zma013210|Zea_mays|NAC|GRMZM2G312201_T01	1.003e-08	28.6767	63.8	375
all-unigene003637	400	Osj050499	Osj050499|Oryza_sativa_subsp._japonica|NF-YA|NM_001054820	2e-09	29.92	58.2	400
all-unigene003678	336	Zma024686	Zma024686|Zea_mays|bHLH|GRMZM2G057260_T01	2e-07	24.3	50.8	336
all-unigene003712	275	Vvi004072	Vvi004072|Vitis_vinifera|GRAS|XM_002267520	2e-29	58.7	124	275
all-unigene003802	244	Ath030103	Ath030103|Arabidopsis_thaliana|C2H2|AT5G15280.1;NM_121532	3e-22	51.82	100	244
all-unigene003810	648	Zma013210	Zma013210|Zea_mays|NAC|GRMZM2G312201_T01	9e-12	29.9417	84.1167	648
all-unigene003825	455	Osj055517	Osj055517|Oryza_sativa_subsp._japonica|Nin-like|LOC_Os06g12360.1	1.0015e-06	31.1375	67.25	455
all-unigene003872	964	Osj032659	Osj032659|Oryza_sativa_subsp._japonica|bZIP|NM_001072729	2e-37	28.53	153	964
all-unigene003875	363	Aly000364	Aly000364|Arabidopsis_lyrata|GATA|fgenesh2_kg.7__409__AT4G36620.1	2e-32	71.43	134	363
all-unigene003881	333	Bna014190	Bna014190|Brassica_napus|bHLH|PUT-173a-Brassica_napus-113582	4e-34	77.48	139	333
all-unigene003901	434	Vvi022854	Vvi022854|Vitis_vinifera|M-type|GSVIVT00006101001	2e-26	44.52	115	434
all-unigene003926	533	Vvi038228	Vvi038228|Vitis_vinifera|bHLH|XM_002273771	3e-23	37.08	104	533
all-unigene003934	737	Ath029021	Ath029021|Arabidopsis_thaliana|C3H|AT3G19360.1;NM_112823	4.5e-06	62.825	184.9	737
all-unigene003939	219	Aly029873	Aly029873|Arabidopsis_lyrata|bHLH|scaffold_600819.1	3e-26	73.42	113	219
all-unigene003966	521	Osj032659	Osj032659|Oryza_sativa_subsp._japonica|bZIP|NM_001072729	1e-26	39.02	116	521
all-unigene003994	1072	Bna015373	Bna015373|Brassica_napus|NAC|PUT-173a-Brassica_napus-120154	4e-143	100	504	1072
all-unigene003995	303	Aly017075	Aly017075|Arabidopsis_lyrata|NAC|fgenesh2_kg.7__450__AT4G36160.1	4e-35	77.17	143	303
all-unigene003997	345	Osj050499	Osj050499|Oryza_sativa_subsp._japonica|NF-YA|NM_001054820	5e-13	39.09	69.7	345
all-unigene004005	767	Ath014852	Ath014852|Arabidopsis_thaliana|NAC|AT3G03200.1;NM_111190	7e-136	96.22	479	767
all-unigene004052	205	Bna009568	Bna009568|Brassica_napus|B3|PUT-173a-Brassica_napus-36966;gnl|UG|Bna#S39251506	5e-35	95.65	142	205
all-unigene004076	314	Mgu011804	Mgu011804|Mimulus_guttatus|S1Fa-like|mgf019748m	2e-10	43.3	60.8	314
all-unigene004085	451	Pth030298	Pth030298|Populus_trichocarpa|GRF|POPTR_0002s11590.1	5e-08	35.915	36.35	451
all-unigene004161	667	Zma013210	Zma013210|Zea_mays|NAC|GRMZM2G312201_T01	1.00014e-11	31.006	85.78	667
all-unigene004171	307	Mgu011804	Mgu011804|Mimulus_guttatus|S1Fa-like|mgf019748m	1.30015e-08	42.4925	58.025	307
all-unigene004185	1146	Ath026453	Ath026453|Arabidopsis_thaliana|WRKY|AT5G45050.2;NM_123873	1e-38	27.6	157	1146
all-unigene004243	498	Aly000206	Aly000206|Arabidopsis_lyrata|B3|scaffold_401535.1	5e-56	74.56	213	498
all-unigene004244	971	Ath003302	Ath003302|Arabidopsis_thaliana|ARF|AT1G77850.1;NM_106434	1e-83	70.49	162.9	971
all-unigene004304	292	Ath030153	Ath030153|Arabidopsis_thaliana|MIKC|AT5G62165.1;AT5G62165.2;AT5G62165.3;NM_001037046;NM_125610;NM_180916	2e-35	88.46	144	292
all-unigene004336	559	Bna011122	Bna011122|Brassica_napus|WRKY|gnl|UG|Bna#S39085831;PUT-173a-Brassica_napus-19275	1e-69	93.59	259	559
all-unigene004360	372	Ath016474	Ath016474|Arabidopsis_thaliana|GRAS|AT1G50600.1;NM_103942	3e-36	62.22	147	372
all-unigene004367	908	Aly008578	Aly008578|Arabidopsis_lyrata|bZIP|Al_scaffold_0007_453	7e-75	75.27	277	908
all-unigene004425	372	Cnc009691	Cnc009691|Chlorella_sp._NC64A|MYB_related|estExt_fgenesh3_pg.C_240053	5e-08	35.04	53.1	372
all-unigene004499	710	Ath012957	Ath012957|Arabidopsis_thaliana|G2-like|AT3G12730.1;NM_112109	1.00015e-26	84.65	122.5	710
all-unigene004703	255	Osj032659	Osj032659|Oryza_sativa_subsp._japonica|bZIP|NM_001072729	7e-10	36.9	59.3	255
all-unigene004737	393	Bdi017962	Bdi017962|Brachypodium_distachyon|bHLH|Bradi2g44120.1	5e-08	28.7	53.5	393
all-unigene004781	406	Aly022517	Aly022517|Arabidopsis_lyrata|GRAS|fgenesh2_kg.4__2711__AT2G45160.1	1e-24	65.87	108	406
all-unigene004788	351	Ath008809	Ath008809|Arabidopsis_thaliana|NAC|AT1G64100.2;NM_001084301	1.63333e-06	31.5667	64.7	351
all-unigene004802	418	Mgu011804	Mgu011804|Mimulus_guttatus|S1Fa-like|mgf019748m	5e-08	38.855	64.15	418
all-unigene004803	676	Mgu011804	Mgu011804|Mimulus_guttatus|S1Fa-like|mgf019748m	1.33667e-07	33.8567	66.3667	676
all-unigene004854	310	Rsa010910	Rsa010910|Raphanus_sativus|bHLH|gnl|UG|Rsa#S43007379	2e-40	84.31	160	310
all-unigene004939	389	Ath030085	Ath030085|Arabidopsis_thaliana|WRKY|AT4G12020.2;NM_001125496	9e-09	34.82	55.8	389
all-unigene004955	1470	Vvi038204	Vvi038204|Vitis_vinifera|C3H|XM_002281419	9e-68	34.74	254	1470
all-unigene005004	281	Aly027950	Aly027950|Arabidopsis_lyrata|bHLH|fgenesh1_pm.C_scaffold_1001571	2e-06	31.52	48.1	281
all-unigene005009	318	Ath011142	Ath011142|Arabidopsis_thaliana|Dof|AT5G39660.1;AT5G39660.2;NM_123328;NM_180775	4e-16	59.7433	40.6667	318
all-unigene005058	537	Ath020947	Ath020947|Arabidopsis_thaliana|MYB|AT5G61420.2;NM_125535	4e-56	68.6	214	537
all-unigene005064	514	Mgu011804	Mgu011804|Mimulus_guttatus|S1Fa-like|mgf019748m	2.00667e-08	32.7867	57.7667	514
all-unigene005096	913	Vvi004072	Vvi004072|Vitis_vinifera|GRAS|XM_002267520	1e-27	32.16	120	913
all-unigene005145	419	Mtr027012	Mtr027012|Medicago_truncatula|LBD|IMGA|MEDTR5G092860.1	5e-14	32.76	73.6	419
all-unigene005146	401	Ath008809	Ath008809|Arabidopsis_thaliana|NAC|AT1G64100.2;NM_001084301	1.167e-06	29.3625	67.9833	401
all-unigene005170	630	Osj055517	Osj055517|Oryza_sativa_subsp._japonica|Nin-like|LOC_Os06g12360.1	1.5e-08	30.08	99.25	630
all-unigene005205	296	Mgu011804	Mgu011804|Mimulus_guttatus|S1Fa-like|mgf019748m	1.20333e-06	35.1433	50.7333	296
all-unigene005208	284	Ath008809	Ath008809|Arabidopsis_thaliana|NAC|AT1G64100.2;NM_001084301	9.45543e-07	30.0133	53.6583	284
all-unigene005221	557	Mtr042321	Mtr042321|Medicago_truncatula|bZIP|IMGA|AC225518_34.1	2e-15	35.43	79	557
all-unigene005259	928	Aly022940	Aly022940|Arabidopsis_lyrata|STAT|fgenesh2_kg.7__3481__AT1G17040.1	8e-140	87.27	493	928
all-unigene005260	1104	Cnc009691	Cnc009691|Chlorella_sp._NC64A|MYB_related|estExt_fgenesh3_pg.C_240053	1.5e-19	29.78	94.35	1104
all-unigene005274	634	Bna023124	Bna023124|Brassica_napus|G2-like|PUT-173a-Brassica_napus-125250	1e-73	92.84	146.55	634
all-unigene005308	318	Ath008809	Ath008809|Arabidopsis_thaliana|NAC|AT1G64100.2;NM_001084301	1.01331e-07	28.864	59.3	318
all-unigene005332	811	Aly023910	Aly023910|Arabidopsis_lyrata|G2-like|scaffold_304362.1	1e-47	52.78	186	811
all-unigene005347	232	Vvi022780	Vvi022780|Vitis_vinifera|Trihelix|GSVIVT00038528001	1e-16	54.79	82	232
all-unigene005360	270	Vvi004072	Vvi004072|Vitis_vinifera|GRAS|XM_002267520	6e-10	66.015	39.65	270
all-unigene005382	732	Ath030085	Ath030085|Arabidopsis_thaliana|WRKY|AT4G12020.2;NM_001125496	4e-30	35.29	128	732
all-unigene005442	457	Nta000199	Nta000199|Nicotiana_tabacum|WRKY|PUT-173a-Nicotiana_tabacum-98455;gnl|UG|Nta#S33577616;gnl|UG|Nta#S33577742;PUT-173a-Nicotiana_tabacum-49962	1e-26	40.41	115	457
all-unigene005475	769	Bdi014787	Bdi014787|Brachypodium_distachyon|G2-like|Bradi1g36240.1	6e-37	37.01	151	769
all-unigene005485	700	Aly016275	Aly016275|Arabidopsis_lyrata|GeBP|Al_scaffold_0006_1329	1e-61	56.48	233	700
all-unigene005538	411	Aly014492	Aly014492|Arabidopsis_lyrata|bHLH|Al_scaffold_0002_1806	1e-40	69.7	162	411
all-unigene005646	501	Bna020409	Bna020409|Brassica_napus|BES1|PUT-173a-Brassica_napus-78065	2e-46	95.56	181	501
all-unigene005700	1423	Vvi004072	Vvi004072|Vitis_vinifera|GRAS|XM_002267520	3e-97	47.11	352	1423
all-unigene005734	899	Vvi010570	Vvi010570|Vitis_vinifera|LBD|GSVIVT00020863001	2.28571e-07	26.6157	78.5143	899
all-unigene005779	576	Ath003182	Ath003182|Arabidopsis_thaliana|bHLH|AT2G40200.1;NM_129578	7e-62	72.93	233	576
all-unigene005804	376	Bra004327	Bra004327|Brassica_rapa|LBD|gnl|UG|Bra#S40777804;PUT-171a-Brassica_rapa-2153	2e-16	64.705	51.4	376
all-unigene005817	729	Zma013210	Zma013210|Zea_mays|NAC|GRMZM2G312201_T01	1.015e-11	28.52	72.575	729
all-unigene005923	554	Bna020688	Bna020688|Brassica_napus|Whirly|PUT-173a-Brassica_napus-67297	6e-84	97.65	306	554
all-unigene005932	521	Zma010212	Zma010212|Zea_mays|ZF-HD|GRMZM2G462417_T01	1.265e-08	33.1975	89.125	521
all-unigene005959	358	Vvi022780	Vvi022780|Vitis_vinifera|Trihelix|GSVIVT00038528001	6e-16	34.45	79.3	358
all-unigene005962	713	Ath011301	Ath011301|Arabidopsis_thaliana|FAR1|AT4G19990.1;NM_118118	2e-42	69.54	95.65	713
all-unigene005983	405	Ath024739	Ath024739|Arabidopsis_thaliana|C3H|AT4G25440.1;NM_118676	2e-50	97.915	108.15	405
all-unigene006031	727	Bdi016129	Bdi016129|Brachypodium_distachyon|MYB_related|Bradi2g00420.1	3e-17	28.33	85.9	727
all-unigene006052	622	Ath010406	Ath010406|Arabidopsis_thaliana|bHLH|AT1G72210.1;NM_105880	8e-65	80.84	243	622
all-unigene006162	499	Vvi012188	Vvi012188|Vitis_vinifera|bZIP|XM_002281039	5e-16	80.92	146.65	499
all-unigene006175	1230	Ath003175	Ath003175|Arabidopsis_thaliana|NAC|AT1G01010.1;NM_099983	1e-100	55.58	363	1230
all-unigene006194	309	Zma040512	Zma040512|Zea_mays|NAC|GRMZM2G312201_T02	1e-22	47.47	101	309
all-unigene006218	670	Aly002511	Aly002511|Arabidopsis_lyrata|G2-like|scaffold_800366.1	1.00001e-08	31.23	64.7	670
all-unigene006222	703	Ath017618	Ath017618|Arabidopsis_thaliana|HD-ZIP|AT5G06710.1;NM_120754	4e-51	71.56	198	703
all-unigene006293	245	Bna016005	Bna016005|Brassica_napus|BBR/BPC|PUT-173a-Brassica_napus-37742	3.5e-07	92.31	70.5	245
all-unigene006314	409	Ath012350	Ath012350|Arabidopsis_thaliana|Dof|AT1G26790.1;NM_102442	2e-26	65.12	114	409
all-unigene006324	710	Zma013210	Zma013210|Zea_mays|NAC|GRMZM2G312201_T01	1.00008e-11	29.848	115.94	710
all-unigene006331	673	Ath014775	Ath014775|Arabidopsis_thaliana|bHLH|AT1G22490.1;NM_102098	1e-71	77.11	266	673
all-unigene006342	223	Bra010592	Bra010592|Brassica_rapa|bHLH|PUT-171a-Brassica_rapa-23224	7e-34	94.59	139	223
all-unigene006430	726	Bra004434	Bra004434|Brassica_rapa|MYB|PUT-171a-Brassica_rapa-22426;gnl|UG|Bra#S40788096	4e-97	85.44	351	726
all-unigene006474	858	Gma029816	Gma029816|Glycine_max|MYB_related|Glyma18g31990.1	3e-09	24.73	59.7	858
all-unigene006495	882	Aly027950	Aly027950|Arabidopsis_lyrata|bHLH|fgenesh1_pm.C_scaffold_1001571	5e-27	30.77	118	882
all-unigene006501	1221	Aly003364	Aly003364|Arabidopsis_lyrata|CO-like|scaffold_104551.1	2e-117	81.555	221.1	1221
all-unigene006512	560	Ath008809	Ath008809|Arabidopsis_thaliana|NAC|AT1G64100.2;NM_001084301	8.00128e-07	27.602	60.92	560
all-unigene006542	1795	Ath020147	Ath020147|Arabidopsis_thaliana|FAR1|AT1G52520.1;NM_104130	0	73.82	841	1795
all-unigene006556	841	Ath014191	Ath014191|Arabidopsis_thaliana|C3H|AT5G18550.1;NM_121860	7.50015e-11	56.4025	149.45	841
all-unigene006564	754	Bna022886	Bna022886|Brassica_napus|ERF|gnl|UG|Bna#S25480062	4e-99	96.59	357	754
all-unigene006570	598	Osi018905	Osi018905|Oryza_sativa_subsp._indica|MYB_related|BGIOSGA022099-TA	2e-14	28.07	75.9	598
all-unigene006592	324	Pth038798	Pth038798|Populus_trichocarpa|bHLH|POPTR_0002s10030.1	1e-50	92.45	194	324
all-unigene006601	216	Bra002311	Bra002311|Brassica_rapa|NAC|PUT-171a-Brassica_rapa-25057;gnl|UG|Bra#S40794948	4e-28	88.06	119	216
all-unigene006623	809	Ath022184	Ath022184|Arabidopsis_thaliana|ERF|AT4G13620.1;NM_117436	2e-83	69.47	306	809
all-unigene006627	268	Ath026453	Ath026453|Arabidopsis_thaliana|WRKY|AT5G45050.2;NM_123873	2e-14	45.57	74.3	268
all-unigene006628	615	Aly002511	Aly002511|Arabidopsis_lyrata|G2-like|scaffold_800366.1	4.5e-08	38.51	67.4	615
all-unigene006757	202	Bra010199	Bra010199|Brassica_rapa|MYB_related|PUT-171a-Brassica_rapa-41255	3e-32	86.57	133	202
all-unigene006825	458	Ath001165	Ath001165|Arabidopsis_thaliana|GRF|AT4G37740.1;NM_119936	2e-38	66.06	155	458
all-unigene006844	861	Ath030177	Ath030177|Arabidopsis_thaliana|NAC|AT4G28500.1;NM_118992	4e-109	85.65	391	861
all-unigene006865	241	Bra011158	Bra011158|Brassica_rapa|bHLH|PUT-171a-Brassica_rapa-18051	5e-17	95.65	51.8	241
all-unigene006933	1071	Bra001283	Bra001283|Brassica_rapa|MYB_related|PUT-171a-Brassica_rapa-20983;gnl|UG|Bra#S40802109	2e-104	80.13	375	1071
all-unigene007070	1139	Ath006788	Ath006788|Arabidopsis_thaliana|C2H2|AT5G52010.1;NM_124580	2e-167	86.89	585	1139
all-unigene007106	433	Osj031905	Osj031905|Oryza_sativa_subsp._japonica|B3|LOC_Os07g17230.1	2.50005e-08	41.3575	68.075	433
all-unigene007153	413	Bna004069	Bna004069|Brassica_napus|bHLH|PUT-173a-Brassica_napus-99354;gnl|UG|Bna#S39255104	1e-51	97.48	198	413
all-unigene007277	1381	Ath023689	Ath023689|Arabidopsis_thaliana|B3|AT2G24690.1;NM_128030	1e-55	49.35	339.5	1381
all-unigene007278	1598	Ath023689	Ath023689|Arabidopsis_thaliana|B3|AT2G24690.1;NM_128030	4e-39	45.75	301	1598
all-unigene007288	334	Bna022345	Bna022345|Brassica_napus|ERF|PUT-173a-Brassica_napus-74118	5e-46	87	179	334
all-unigene007331	955	Mgu011804	Mgu011804|Mimulus_guttatus|S1Fa-like|mgf019748m	4.57429e-09	31.2857	67.1571	955
all-unigene007332	271	Mgu011804	Mgu011804|Mimulus_guttatus|S1Fa-like|mgf019748m	2.0001e-07	37.11	57.2	271
all-unigene007410	1588	Ath024723	Ath024723|Arabidopsis_thaliana|MYB|AT3G18100.1;NM_112692	0	65.79	661	1588
all-unigene007428	664	Rsa009478	Rsa009478|Raphanus_sativus|MYB_related|gnl|UG|Rsa#S43016038	3e-98	91.71	354	664
all-unigene007484	1505	Bna004579	Bna004579|Brassica_napus|M-type|PUT-173a-Brassica_napus-103401;gnl|UG|Bna#S38993259	0	96.155	337.95	1505
all-unigene007497	982	Aly013603	Aly013603|Arabidopsis_lyrata|G2-like|fgenesh2_kg.7__2541__AT4G17695.1	5e-98	69.66	354	982
all-unigene007509	1731	Zma009794	Zma009794|Zea_mays|FAR1|GRMZM2G083374_T01	1e-122	43.91	437	1731
all-unigene007602	1006	Aly009701	Aly009701|Arabidopsis_lyrata|WRKY|Al_scaffold_0008_414	3e-15	25	79.7	1006
all-unigene007614	1305	Aly012302	Aly012302|Arabidopsis_lyrata|G2-like|fgenesh1_pm.C_scaffold_4001775	1e-152	80.32	536	1305
all-unigene007615	1631	Ath015375	Ath015375|Arabidopsis_thaliana|FAR1|AT1G10240.1;NM_100898	0	95.185	435	1631
all-unigene007623	878	Ath008275	Ath008275|Arabidopsis_thaliana|WRKY|AT5G45260.1;NM_123894	5e-10	52.725	245.4	878
all-unigene007624	978	Aly013445	Aly013445|Arabidopsis_lyrata|WRKY|Al_scaffold_0008_337	4.5e-07	50.66	241.3	978
all-unigene007625	1076	Aly009701	Aly009701|Arabidopsis_lyrata|WRKY|Al_scaffold_0008_414	4.5e-06	44.425	208.75	1076
all-unigene007626	458	Ath026453	Ath026453|Arabidopsis_thaliana|WRKY|AT5G45050.2;NM_123873	7e-45	62.66	176	458
all-unigene007631	723	Aly002511	Aly002511|Arabidopsis_lyrata|G2-like|scaffold_800366.1	1.2e-08	35.6133	74.3333	723
all-unigene007632	873	Ath030085	Ath030085|Arabidopsis_thaliana|WRKY|AT4G12020.2;NM_001125496	7e-45	36.59	177	873
all-unigene007698	492	Vvi012188	Vvi012188|Vitis_vinifera|bZIP|XM_002281039	6e-11	28.85	63.9	492
all-unigene007738	841	Aly012929	Aly012929|Arabidopsis_lyrata|TCP|fgenesh2_kg.8__2066__AT5G60970.1	1e-106	80.99	383	841
all-unigene007783	1097	Aly024027	Aly024027|Arabidopsis_lyrata|C3H|scaffold_302603.1	2e-102	74.16	369	1097
all-unigene007807	325	Bdi017962	Bdi017962|Brachypodium_distachyon|bHLH|Bradi2g44120.1	3e-25	52.53	110	325
all-unigene007819	553	Aly013240	Aly013240|Arabidopsis_lyrata|E2F/DP|fgenesh2_kg.4__1634__AT2G36010.3	6e-77	83.23	283	553
all-unigene007847	596	Rsa001975	Rsa001975|Raphanus_sativus|bHLH|PUT-163a-Raphanus_sativus-5772;gnl|UG|Rsa#S42014963	2e-94	95.45	341	596
all-unigene007856	783	Bna007405	Bna007405|Brassica_napus|GATA|PUT-173a-Brassica_napus-104450;gnl|UG|Bna#S25417666	7e-129	97.86	456	783
all-unigene007872	783	Ath019821	Ath019821|Arabidopsis_thaliana|bHLH|AT1G61660.1;NM_104847	7e-73	69.44	270	783
all-unigene007932	663	Ath031433	Ath031433|Arabidopsis_thaliana|B3|gnl|UG|At#S11736347	2.52013e-10	44.875	94.4375	663
all-unigene007933	1022	Ath031433	Ath031433|Arabidopsis_thaliana|B3|gnl|UG|At#S11736347	1.25e-12	37.6587	135.1	1022
all-unigene007934	596	Ath031433	Ath031433|Arabidopsis_thaliana|B3|gnl|UG|At#S11736347	1.01e-09	40.8025	102.45	596
all-unigene007947	1048	Bna014860	Bna014860|Brassica_napus|MYB|PUT-173a-Brassica_napus-18025	4e-135	96.23	478	1048
all-unigene007956	998	Ath030085	Ath030085|Arabidopsis_thaliana|WRKY|AT4G12020.2;NM_001125496	1e-40	34.64	164	998
all-unigene007961	898	Zma013210	Zma013210|Zea_mays|NAC|GRMZM2G312201_T01	8.0001e-07	27.394	72.94	898
all-unigene007984	537	Bra010516	Bra010516|Brassica_rapa|MYB|PUT-171a-Brassica_rapa-20924	3e-76	86	281	537
all-unigene008033	1191	Aly006469	Aly006469|Arabidopsis_lyrata|HD-ZIP|fgenesh2_kg.1__3231__AT1G30490.1	0	93.09	632	1191
all-unigene008111	1199	Bna005062	Bna005062|Brassica_napus|GATA|PUT-173a-Brassica_napus-110581;gnl|UG|Bna#S39269778	2e-164	100	575	1199
all-unigene008146	1680	Osi002845	Osi002845|Oryza_sativa_subsp._indica|MYB_related|BGIOSGA035841-TA	4e-40	28.6	163	1680
all-unigene008208	266	Vvi038228	Vvi038228|Vitis_vinifera|bHLH|XM_002273771	2e-10	36.47	61.2	266
all-unigene008212	756	Ath031507	Ath031507|Arabidopsis_thaliana|HD-ZIP|gnl|UG|At#S11705699	5e-107	80.56	384	756
all-unigene008305	889	Osi002845	Osi002845|Oryza_sativa_subsp._indica|MYB_related|BGIOSGA035841-TA	2e-39	44.14	159	889
all-unigene008377	969	Aly009911	Aly009911|Arabidopsis_lyrata|ARR-B|scaffold_201596.1	4e-96	72.66	348	969
all-unigene008379	1240	Aly012633	Aly012633|Arabidopsis_lyrata|GATA|scaffold_401176.1	3e-84	57.97	309	1240
all-unigene008381	454	Osi022117	Osi022117|Oryza_sativa_subsp._indica|bZIP|BGIOSGA034759-TA	4.5e-10	55.015	77.05	454
all-unigene008437	1003	Aly023553	Aly023553|Arabidopsis_lyrata|WRKY|scaffold_701634.1	4.5e-16	56.32	216.8	1003
all-unigene008442	3011	Mgu011804	Mgu011804|Mimulus_guttatus|S1Fa-like|mgf019748m	2.50773e-09	31.92	93.725	3011
all-unigene008499	208	Ath012637	Ath012637|Arabidopsis_thaliana|SBP|AT1G76580.1;NM_106308	1e-17	74.67	85.1	208
all-unigene008605	1005	Ath029526	Ath029526|Arabidopsis_thaliana|ERF|AT2G44940.1;NM_130059	3e-84	68.71	309	1005
all-unigene008764	504	Ath031507	Ath031507|Arabidopsis_thaliana|HD-ZIP|gnl|UG|At#S11705699	2e-77	84.15	284	504
all-unigene008800	740	Bna001306	Bna001306|Brassica_napus|WRKY|PUT-173a-Brassica_napus-66797;gnl|UG|Bna#S52623228;gnl|UG|Bna#S52434878	3e-120	84	427	740
all-unigene008857	795	Ath004650	Ath004650|Arabidopsis_thaliana|C3H|AT1G10320.1;NM_100906	3e-75	71.0967	106.4	795
all-unigene008904	930	Ath003752	Ath003752|Arabidopsis_thaliana|bHLH|AT5G46690.1;NM_124039	3e-89	79.18	325	930
all-unigene008970	662	Sbi021369	Sbi021369|Sorghum_bicolor|FAR1|Sb02g005860;XM_002461595	7e-07	26.42	51.2	662
all-unigene008971	560	Ath030085	Ath030085|Arabidopsis_thaliana|WRKY|AT4G12020.2;NM_001125496	7e-15	29.79	77.4	560
all-unigene008973	553	Bna015714	Bna015714|Brassica_napus|Dof|PUT-173a-Brassica_napus-44167	1.5e-14	93.18	198.55	553
all-unigene008981	312	Mgu011804	Mgu011804|Mimulus_guttatus|S1Fa-like|mgf019748m	1.545e-06	31.835	49.9	312
all-unigene008988	269	Vvi004072	Vvi004072|Vitis_vinifera|GRAS|XM_002267520	6e-15	40.45	76.3	269
all-unigene008989	978	Vvi004072	Vvi004072|Vitis_vinifera|GRAS|XM_002267520	2e-58	37.74	223	978
all-unigene009118	213	Vvi010119	Vvi010119|Vitis_vinifera|bZIP|XM_002270142	3e-12	41.43	67.4	213
all-unigene009135	1602	Zma013210	Zma013210|Zea_mays|NAC|GRMZM2G312201_T01	5.00008e-29	24.225	151.75	1602
all-unigene009186	673	Bna008755	Bna008755|Brassica_napus|bHLH|PUT-173a-Brassica_napus-82988;gnl|UG|Bna#S38913413	2e-14	35.575	48.75	673
all-unigene009230	819	Rsa005940	Rsa005940|Raphanus_sativus|Trihelix|gnl|UG|Rsa#S41980456	2e-97	78.76	352	819
all-unigene009241	2622	Ath030085	Ath030085|Arabidopsis_thaliana|WRKY|AT4G12020.2;NM_001125496	1e-70	27.88	265	2622
all-unigene009246	1546	Bna001604	Bna001604|Brassica_napus|Dof|PUT-173a-Brassica_napus-131913;PUT-173a-Brassica_napus-131915;PUT-173a-Brassica_napus-131914	0	97.67	724	1546
all-unigene009285	1112	Aly027950	Aly027950|Arabidopsis_lyrata|bHLH|fgenesh1_pm.C_scaffold_1001571	3e-40	47.63	217	1112
all-unigene009293	280	Bna022651	Bna022651|Brassica_napus|HB-other|PUT-173a-Brassica_napus-41323	7e-39	97.89	155	280
all-unigene009425	1103	Aly005957	Aly005957|Arabidopsis_lyrata|NAC|fgenesh2_kg.8__2118__AT5G61430.1	2e-163	85.63	572	1103
all-unigene009426	534	Bna007676	Bna007676|Brassica_napus|NAC|PUT-173a-Brassica_napus-92891;gnl|UG|Bna#S39175787	1e-78	86.05	288	534
all-unigene009469	1560	Gma029171	Gma029171|Glycine_max|C2H2|Glyma06g41530.1	3e-147	60.59	519	1560
all-unigene009470	1509	Gma029171	Gma029171|Glycine_max|C2H2|Glyma06g41530.1	1e-158	67.19	556	1509
all-unigene009471	1461	Gma029171	Gma029171|Glycine_max|C2H2|Glyma06g41530.1	2e-152	65.15	536	1461
all-unigene009499	872	Bna007162	Bna007162|Brassica_napus|HSF|PUT-173a-Brassica_napus-64416;gnl|UG|Bna#S38999615	4e-108	96.69	388	872
all-unigene009514	492	Bdi001982	Bdi001982|Brachypodium_distachyon|MYB|Bradi1g30250.1	2.525e-10	47.915	64.1	492
all-unigene009513	536	Bdi001982	Bdi001982|Brachypodium_distachyon|MYB|Bradi1g30250.1	1.3e-11	46.445	66.65	536
all-unigene009516	1021	Bna005956	Bna005956|Brassica_napus|MYB_related|PUT-173a-Brassica_napus-74750;gnl|UG|Bna#S39179382	5e-94	68.52	341	1021
all-unigene009517	487	Bra004503	Bra004503|Brassica_rapa|MYB_related|gnl|UG|Bra#S40759719;PUT-171a-Brassica_rapa-20190	3e-48	85.62	187	487
all-unigene009565	1070	Bna006680	Bna006680|Brassica_napus|C2H2|PUT-173a-Brassica_napus-112509;gnl|UG|Bna#S39004346	3e-100	99.31	362	1070
all-unigene009674	613	Bna003917	Bna003917|Brassica_napus|WRKY|PUT-173a-Brassica_napus-87591;gnl|UG|Bna#S52434859	3e-69	85.96	258	613
all-unigene009675	507	Bna020125	Bna020125|Brassica_napus|WRKY|PUT-173a-Brassica_napus-148583	5e-18	76.9	133.15	507
all-unigene009727	215	Ath024210	Ath024210|Arabidopsis_thaliana|WRKY|AT2G30590.1;NM_128611	8e-15	100	47.95	215
all-unigene009763	340	Vvi022854	Vvi022854|Vitis_vinifera|M-type|GSVIVT00006101001	4e-21	47.57	96.7	340
all-unigene009764	526	Tae001339	Tae001339|Triticum_aestivum|NAC|gnl|UG|Ta#S52543988	1e-30	43.79	129	526
all-unigene009840	1672	Ath023130	Ath023130|Arabidopsis_thaliana|ARF|AT2G33860.1;NM_128946	0	84.02	742	1672
all-unigene009842	1258	Aly001361	Aly001361|Arabidopsis_lyrata|bHLH|fgenesh2_kg.1__2794__AT1G25350.1	0	84.56	723	1258
all-unigene010023	1315	Mes044731	Mes044731|Manihot_esculenta|HD-ZIP|cassava36876.valid.m1	5e-145	71.2	511	1315
all-unigene010043	222	Bra008819	Bra008819|Brassica_rapa|bHLH|gnl|UG|Bra#S40760002	1e-23	87.6333	49.6667	222
all-unigene010064	989	Bna001984	Bna001984|Brassica_napus|WRKY|PUT-173a-Brassica_napus-28698;gnl|UG|Bna#S52434847;PUT-173a-Brassica_napus-28697	6e-133	82.54	470	989
all-unigene010090	201	Bna002308	Bna002308|Brassica_napus|G2-like|PUT-173a-Brassica_napus-317148615;PUT-173a-Brassica_napus-317148616;gnl|UG|Bna#S38956759	1e-18	92.98	88.2	201
all-unigene010254	1020	Bna001659	Bna001659|Brassica_napus|bZIP|PUT-173a-Brassica_napus-78888;gnl|UG|Bna#S39196147;PUT-173a-Brassica_napus-52623	2e-147	99.68	518	1020
all-unigene010261	1766	Ath020540	Ath020540|Arabidopsis_thaliana|MYB|AT4G32730.2;NM_202989	0	70.15	791	1766
all-unigene010262	881	Ath020540	Ath020540|Arabidopsis_thaliana|MYB|AT4G32730.2;NM_202989	1e-90	64.06	330	881
all-unigene010263	1352	Aly002511	Aly002511|Arabidopsis_lyrata|G2-like|scaffold_800366.1	6e-151	61.1	531	1352
all-unigene010266	823	Osi019833	Osi019833|Oryza_sativa_subsp._indica|ERF|BGIOSGA029071-TA	2e-120	73.72	429	823
all-unigene010273	1259	Ath024969	Ath024969|Arabidopsis_thaliana|C3H|AT2G16485.1;NM_127202	3e-35	27.61	146	1259
all-unigene010311	923	Ath009805	Ath009805|Arabidopsis_thaliana|bHLH|AT3G24140.1;NM_113319	3e-92	84.64	335	923
all-unigene010318	1324	Bna013639	Bna013639|Brassica_napus|bHLH|PUT-173a-Brassica_napus-108641	6e-175	97.8	610	1324
all-unigene010325	976	Bra003402	Bra003402|Brassica_rapa|NAC|gnl|UG|Bra#S40801969;PUT-171a-Brassica_rapa-13680	2e-152	97.37	535	976
all-unigene010329	1313	Ath013231	Ath013231|Arabidopsis_thaliana|FAR1|AT4G15090.1;NM_117596	0	87.39	354.95	1313
all-unigene010333	1124	Bna002059	Bna002059|Brassica_napus|WRKY|gnl|UG|Bna#S52623231;PUT-173a-Brassica_napus-133721;PUT-173a-Brassica_napus-133722	1e-156	98.48	549	1124
all-unigene010344	2668	Mgu011804	Mgu011804|Mimulus_guttatus|S1Fa-like|mgf019748m	8.33333e-11	37.4867	92.9833	2668
all-unigene010346	657	Ath001183	Ath001183|Arabidopsis_thaliana|HD-ZIP|AT4G04890.1;NM_116727	8e-112	92.24	399	657
all-unigene010354	699	Bra003145	Bra003145|Brassica_rapa|Nin-like|PUT-171a-Brassica_rapa-9241;gnl|UG|Bra#S40769042	1e-51	72.77	199	699
all-unigene010437	1029	Bna005647	Bna005647|Brassica_napus|DBB|PUT-173a-Brassica_napus-56535;gnl|UG|Bna#S52584694	2e-137	89.54	485	1029
all-unigene010445	1608	Ath029385	Ath029385|Arabidopsis_thaliana|bHLH|AT2G46510.1;NM_130216	5e-63	76.11	315	1608
all-unigene010457	519	Bna014231	Bna014231|Brassica_napus|MYB_related|PUT-173a-Brassica_napus-51210	2e-54	79.62	208	519
all-unigene010501	232	Bra007212	Bra007212|Brassica_rapa|GRAS|PUT-171a-Brassica_rapa-23010	1e-37	94.74	151	232
all-unigene010502	801	Bra007212	Bra007212|Brassica_rapa|GRAS|PUT-171a-Brassica_rapa-23010	1e-113	96.28	405	801
all-unigene010521	268	Bna020713	Bna020713|Brassica_napus|B3|gnl|UG|Bna#S39242482	4e-34	87.18	139	268
all-unigene010527	256	Bdi014787	Bdi014787|Brachypodium_distachyon|G2-like|Bradi1g36240.1	7e-15	38.82	75.9	256
all-unigene010570	1805	Ath022931	Ath022931|Arabidopsis_thaliana|GRAS|AT3G60630.1;NM_115927	0	68.25	643	1805
all-unigene010571	1556	Aly022517	Aly022517|Arabidopsis_lyrata|GRAS|fgenesh2_kg.4__2711__AT2G45160.1	2e-152	67.85	536	1556
all-unigene010710	273	Bna007325	Bna007325|Brassica_napus|MYB_related|gnl|UG|Bna#S38883357;PUT-173a-Brassica_napus-116753	2e-34	80	140	273
all-unigene010711	961	Rsa001786	Rsa001786|Raphanus_sativus|BBR/BPC|PUT-163a-Raphanus_sativus-12087;gnl|UG|Rsa#S42043100	1e-119	88.15	426	961
all-unigene010739	723	Bna001580	Bna001580|Brassica_napus|C3H|PUT-173a-Brassica_napus-137430;PUT-173a-Brassica_napus-137431;gnl|UG|Bna#S38992788	1e-114	95.19	409	723
all-unigene010851	558	Bra008461	Bra008461|Brassica_rapa|MYB_related|gnl|UG|Bra#S40769483	4e-50	95.82	107.05	558
all-unigene010864	1011	Rsa001505	Rsa001505|Raphanus_sativus|B3|PUT-163a-Raphanus_sativus-6903;gnl|UG|Rsa#S42023325	2e-115	91.51	412	1011
all-unigene010885	362	Osi024694	Osi024694|Oryza_sativa_subsp._indica|LBD|BGIOSGA000185-TA	1e-35	58.33	145	362
all-unigene010934	742	Bdi016129	Bdi016129|Brachypodium_distachyon|MYB_related|Bradi2g00420.1	4.5e-14	31.89	98.15	742
all-unigene010965	1154	Vvi038228	Vvi038228|Vitis_vinifera|bHLH|XM_002273771	5e-15	23.69	79.3	1154
all-unigene010982	496	Mgu011804	Mgu011804|Mimulus_guttatus|S1Fa-like|mgf019748m	1.0003e-10	29.785	68.15	496
all-unigene011011	240	Ath028260	Ath028260|Arabidopsis_thaliana|HB-PHD|AT3G19510.1;NM_112838	1e-18	54.55	88.2	240
all-unigene011035	1141	Bna001782	Bna001782|Brassica_napus|GATA|PUT-173a-Brassica_napus-3148621;gnl|UG|Bna#S39228518;PUT-173a-Brassica_napus-106980	6e-149	94.67	524	1141
all-unigene011080	312	Aly003634	Aly003634|Arabidopsis_lyrata|SBP|scaffold_601959.1	2e-44	87.23	174	312
all-unigene011081	2686	Mgu011804	Mgu011804|Mimulus_guttatus|S1Fa-like|mgf019748m	1e-72	29.81	271	2686
all-unigene011083	1244	Cvu007478	Cvu007478|Coccomyxa_sp._C-169|MYB_related|fgeneshCV_pg.C_scaffold_12000172	3e-40	35.61	163	1244
all-unigene011103	759	Ath026709	Ath026709|Arabidopsis_thaliana|G2-like|AT5G29000.1;AT5G29000.3;NM_001085160;NM_180759	3e-96	76.69	348	759
all-unigene011148	640	Ath003257	Ath003257|Arabidopsis_thaliana|MYB|AT4G09460.1;NM_117014	3e-90	74.67	328	640
all-unigene011170	539	Ath027948	Ath027948|Arabidopsis_thaliana|C3H|AT2G47850.1;AT2G47850.3;NM_001084609;NM_130352	5.33333e-07	65.7267	118.967	539
all-unigene011205	1907	Osi002845	Osi002845|Oryza_sativa_subsp._indica|MYB_related|BGIOSGA035841-TA	4e-107	41.55	386	1907
all-unigene011236	605	Bdi004511	Bdi004511|Brachypodium_distachyon|MYB|Bradi2g42930.1	9e-45	57.14	176	605
all-unigene011266	1119	Bna005725	Bna005725|Brassica_napus|BES1|PUT-173a-Brassica_napus-22298;gnl|UG|Bna#S38910290	9e-121	90.06	430	1119
all-unigene011289	3208	Pth028528	Pth028528|Populus_trichocarpa|GRAS|POPTR_0016s02770.1	4e-12	31.705	143.25	3208
all-unigene011397	1181	Aly015333	Aly015333|Arabidopsis_lyrata|bZIP|scaffold_402899.1	1e-154	76.78	543	1181
all-unigene011447	540	Bna015833	Bna015833|Brassica_napus|BES1|PUT-173a-Brassica_napus-132853	5e-100	97.77	360	540
all-unigene011466	1448	Ath008197	Ath008197|Arabidopsis_thaliana|Trihelix|AT1G33240.1;NM_103052	1.00001e-12	61.57	161.525	1448
all-unigene011519	250	Bna016799	Bna016799|Brassica_napus|HB-other|PUT-173a-Brassica_napus-64082	4e-16	90.15	51.75	250
all-unigene011563	2150	Vvi029095	Vvi029095|Vitis_vinifera|GRAS|GSVIVT00034603001	8e-47	28.42	186	2150
all-unigene011571	2203	Zma055439	Zma055439|Zea_mays|MYB_related|NM_001138118	3.33333e-07	39.4167	71.1333	2203
all-unigene011576	439	Bna006721	Bna006721|Brassica_napus|Dof|PUT-173a-Brassica_napus-93416;gnl|UG|Bna#S44669138	2e-56	85.71	214	439
all-unigene011601	689	Bna006381	Bna006381|Brassica_napus|NF-YC|PUT-173a-Brassica_napus-14780;gnl|UG|Bna#S52594564	2e-65	93.6267	96.8	689
all-unigene011603	626	Bna006381	Bna006381|Brassica_napus|NF-YC|PUT-173a-Brassica_napus-14780;gnl|UG|Bna#S52594564	1e-67	98.02	98.4667	626
all-unigene011602	710	Bna009738	Bna009738|Brassica_napus|NF-YC|PUT-173a-Brassica_napus-100124;gnl|UG|Bna#S38948935	3.5e-08	100	141.35	710
all-unigene011745	861	Ath008280	Ath008280|Arabidopsis_thaliana|TALE|AT4G36870.1;AT4G36870.2;NM_001036720;NM_119851	1e-74	87.64	276	861
all-unigene011746	329	Bna014417	Bna014417|Brassica_napus|TALE|PUT-173a-Brassica_napus-140402	4e-49	98.17	189	329
all-unigene011747	1084	Aly006242	Aly006242|Arabidopsis_lyrata|MYB_related|fgenesh2_kg.2__1530__AT1G72650.2	1e-110	63.22	396	1084
all-unigene011792	264	Ath014191	Ath014191|Arabidopsis_thaliana|C3H|AT5G18550.1;NM_121860	2e-06	54.5167	96.3667	264
all-unigene011807	1077	Aly006531	Aly006531|Arabidopsis_lyrata|Dof|scaffold_403629.1	1e-109	74.77	393	1077
all-unigene011854	3488	Osi035857	Osi035857|Oryza_sativa_subsp._indica|HD-ZIP|BGIOSGA000239-TA	0	52.81	1036	3488
all-unigene011882	2106	Vvi010570	Vvi010570|Vitis_vinifera|LBD|GSVIVT00020863001	7.33333e-26	22.2967	138.667	2106
all-unigene011884	202	Ath030085	Ath030085|Arabidopsis_thaliana|WRKY|AT4G12020.2;NM_001125496	5e-16	71.52	51.4	202
all-unigene011906	704	Ath026270	Ath026270|Arabidopsis_thaliana|HD-ZIP|AT4G21750.1;AT4G21750.2;NM_001036615;NM_118295	3e-121	95.95	431	704
all-unigene011929	1314	Bdi017962	Bdi017962|Brachypodium_distachyon|bHLH|Bradi2g44120.1	9e-51	32.82	198	1314
all-unigene012000	2597	Mgu011804	Mgu011804|Mimulus_guttatus|S1Fa-like|mgf019748m	1.25008e-17	29.7975	125.6	2597
all-unigene012023	1019	Bna005058	Bna005058|Brassica_napus|AP2|PUT-173a-Brassica_napus-102198;gnl|UG|Bna#S38996048	6e-114	92.735	213.5	1019
all-unigene012026	1055	Bna005058	Bna005058|Brassica_napus|AP2|PUT-173a-Brassica_napus-102198;gnl|UG|Bna#S38996048	1e-107	86.945	204	1055
all-unigene012024	245	Ath028461	Ath028461|Arabidopsis_thaliana|AP2|AT5G60120.1;NM_125405	8e-11	70.37	62.4	245
all-unigene012025	963	Bna005058	Bna005058|Brassica_napus|AP2|PUT-173a-Brassica_napus-102198;gnl|UG|Bna#S38996048	5e-111	89.8	397	963
all-unigene012032	546	Cnc007634	Cnc007634|Chlorella_sp._NC64A|Whirly|IGS.gm_12_00206	1e-25	44.155	67.25	546
all-unigene012049	1444	Sbi031465	Sbi031465|Sorghum_bicolor|C2H2|Sb04g020490;XM_002452093	4e-150	75	528	1444
all-unigene012071	258	Ath019544	Ath019544|Arabidopsis_thaliana|G2-like|AT3G04030.1;NM_111274	2e-37	80.65	150	258
all-unigene012075	962	Ath022960	Ath022960|Arabidopsis_thaliana|Dof|AT5G62940.1;NM_125688	7e-102	78.34	367	962
all-unigene012124	1209	Bna002017	Bna002017|Brassica_napus|GATA|PUT-173a-Brassica_napus-132837;PUT-173a-Brassica_napus-132838;gnl|UG|Bna#S38945344	6e-161	99.41	564	1209
all-unigene012125	1802	Ath006017	Ath006017|Arabidopsis_thaliana|C3H|AT5G58620.1;NM_125249	0	69.5	711	1802
all-unigene012147	341	Ath002175	Ath002175|Arabidopsis_thaliana|TALE|AT5G11060.1;NM_121144	7e-60	98.23	225	341
all-unigene012216	939	Aly022249	Aly022249|Arabidopsis_lyrata|CAMTA|fgenesh1_pm.C_scaffold_2000778	9e-116	64.91	413	939
all-unigene012240	485	Bna005489	Bna005489|Brassica_napus|NAC|PUT-173a-Brassica_napus-360148614;gnl|UG|Bna#S25479766	2e-89	98.7	324	485
all-unigene012291	539	Ath012986	Ath012986|Arabidopsis_thaliana|MYB|AT3G52250.1;NM_115085	1e-09	64.27	121.45	539
all-unigene012292	936	Bra001087	Bra001087|Brassica_rapa|bZIP|PUT-171a-Brassica_rapa-27113;gnl|UG|Bra#S40717835	3e-45	74.89	99.15	936
all-unigene012294	1013	Bra001087	Bra001087|Brassica_rapa|bZIP|PUT-171a-Brassica_rapa-27113;gnl|UG|Bra#S40717835	6e-45	78.035	98.6	1013
all-unigene012295	1219	Bra001087	Bra001087|Brassica_rapa|bZIP|PUT-171a-Brassica_rapa-27113;gnl|UG|Bra#S40717835	2e-98	79.25	188.1	1219
all-unigene012304	442	Ghi013563	Ghi013563|Gossypium_hirsutum|S1Fa-like|PUT-165a-Gossypium_hirsutum-55482	2e-15	38.02	78.6	442
all-unigene012305	2197	Mtr023905	Mtr023905|Medicago_truncatula|WRKY|IMGA|AC202489_11.1	3.16667e-06	40.9533	71.5333	2197
all-unigene012306	779	Mgu011804	Mgu011804|Mimulus_guttatus|S1Fa-like|mgf019748m	2.00008e-08	34.3625	80.175	779
all-unigene012312	417	Osi022117	Osi022117|Oryza_sativa_subsp._indica|bZIP|BGIOSGA034759-TA	6e-09	33.05	56.6	417
all-unigene012324	3722	Bdi016129	Bdi016129|Brachypodium_distachyon|MYB_related|Bradi2g00420.1	0	41.62	821	3722
all-unigene012354	905	Bna004769	Bna004769|Brassica_napus|WRKY|PUT-173a-Brassica_napus-122463;gnl|UG|Bna#S52434865	1e-13	79.1	140.35	905
all-unigene012365	402	Ghi013563	Ghi013563|Gossypium_hirsutum|S1Fa-like|PUT-165a-Gossypium_hirsutum-55482	1e-10	35.16	62	402
all-unigene012374	987	Ath018777	Ath018777|Arabidopsis_thaliana|ARF|AT1G19220.1;NM_101780	3e-145	98.19	511	987
all-unigene012389	1559	Bna003809	Bna003809|Brassica_napus|WRKY|gnl|UG|Bna#S52623226;PUT-173a-Brassica_napus-65555	1e-06	48.89	253.6	1559
all-unigene012390	1356	Aly002658	Aly002658|Arabidopsis_lyrata|WRKY|fgenesh2_kg.1__1511__AT1G13960.1	1e-16	52.71	257.65	1356
all-unigene012387	1353	Bna003809	Bna003809|Brassica_napus|WRKY|gnl|UG|Bna#S52623226;PUT-173a-Brassica_napus-65555	5e-10	56.115	273.8	1353
all-unigene012398	1732	Aly024344	Aly024344|Arabidopsis_lyrata|C2H2|scaffold_500136.1	0	80.44	734	1732
all-unigene012399	377	Bna012642	Bna012642|Brassica_napus|C2H2|PUT-173a-Brassica_napus-127272	4e-31	73.58	129	377
all-unigene012400	1377	Ath022709	Ath022709|Arabidopsis_thaliana|C2H2|AT1G14580.1;NM_101325	0	83.12	640	1377
all-unigene012397	1464	Bna012642	Bna012642|Brassica_napus|C2H2|PUT-173a-Brassica_napus-127272	0	91.79	752	1464
all-unigene012451	1628	Ath012548	Ath012548|Arabidopsis_thaliana|ARF|AT5G20730.2;NM_180716	0	97.24	831	1628
all-unigene012493	1453	Bna003893	Bna003893|Brassica_napus|C2H2|PUT-173a-Brassica_napus-56742;PUT-173a-Brassica_napus-56741	0	91.29	701	1453
all-unigene012517	696	Ath021347	Ath021347|Arabidopsis_thaliana|NF-X1|AT5G05660.1;NM_120648	2e-70	81.16	262	696
all-unigene012533	1391	Ath030085	Ath030085|Arabidopsis_thaliana|WRKY|AT4G12020.2;NM_001125496	2e-134	70.41	476	1391
all-unigene012572	1849	Mgu011804	Mgu011804|Mimulus_guttatus|S1Fa-like|mgf019748m	4.2861e-16	33.4329	100.7	1849
all-unigene012598	1558	Vvi038228	Vvi038228|Vitis_vinifera|bHLH|XM_002273771	6e-44	29.12	176	1558
all-unigene012602	1472	Zma013210	Zma013210|Zea_mays|NAC|GRMZM2G312201_T01	4.28657e-18	23.8471	116.486	1472
all-unigene012697	746	Mgu011804	Mgu011804|Mimulus_guttatus|S1Fa-like|mgf019748m	4.02004e-07	35.052	74.66	746
all-unigene012698	238	Mgu011804	Mgu011804|Mimulus_guttatus|S1Fa-like|mgf019748m	2.06604e-06	39.684	51.74	238
all-unigene012699	324	Vvi022854	Vvi022854|Vitis_vinifera|M-type|GSVIVT00006101001	3e-25	61.7	110	324
all-unigene012727	1214	Ath021673	Ath021673|Arabidopsis_thaliana|HB-other|AT1G28420.1;NM_102610	1e-122	65.02	436	1214
all-unigene012744	579	Aly027950	Aly027950|Arabidopsis_lyrata|bHLH|fgenesh1_pm.C_scaffold_1001571	3e-42	49.2	168	579
all-unigene012755	571	Aly029824	Aly029824|Arabidopsis_lyrata|bHLH|scaffold_403077.1	6e-73	86.025	146.15	571
all-unigene012769	1061	Ath016815	Ath016815|Arabidopsis_thaliana|bZIP|AT3G19290.1;NM_112816	1e-85	68.58	313	1061
all-unigene012795	1026	Ath003797	Ath003797|Arabidopsis_thaliana|WRKY|AT5G45050.1;NM_180802	1e-31	29.8	76.25	1026
all-unigene012825	2533	Mtr023905	Mtr023905|Medicago_truncatula|WRKY|IMGA|AC202489_11.1	3.025e-07	38.98	76.875	2533
all-unigene012855	567	Zma043663	Zma043663|Zea_mays|ERF|NM_001147035	4e-12	32.16	68.2	567
all-unigene012922	1094	Rco022349	Rco022349|Ricinus_communis|NF-X1|27791.m000083;XM_002533803	7e-41	32.72	165	1094
all-unigene012978	697	Aly020560	Aly020560|Arabidopsis_lyrata|bHLH|scaffold_701344.1	1e-56	84.74	216	697
all-unigene012986	204	Vvi033786	Vvi033786|Vitis_vinifera|C2H2|XM_002266705	2e-11	49.21	64.3	204
all-unigene012991	1168	Mgu011804	Mgu011804|Mimulus_guttatus|S1Fa-like|mgf019748m	1.75e-17	32.1	88.05	1168
all-unigene012992	260	Mtr023905	Mtr023905|Medicago_truncatula|WRKY|IMGA|AC202489_11.1	1.7e-09	44.41	58.55	260
all-unigene013053	248	Osj031905	Osj031905|Oryza_sativa_subsp._japonica|B3|LOC_Os07g17230.1	2.5e-06	40.57	47.75	248
all-unigene013059	463	Bdi017962	Bdi017962|Brachypodium_distachyon|bHLH|Bradi2g44120.1	1e-46	56.33	182	463
all-unigene013060	1562	Bdi017962	Bdi017962|Brachypodium_distachyon|bHLH|Bradi2g44120.1	4e-132	51.53	468	1562
all-unigene013057	592	Bdi017962	Bdi017962|Brachypodium_distachyon|bHLH|Bradi2g44120.1	8e-49	52.04	190	592
all-unigene013075	628	Vvi029095	Vvi029095|Vitis_vinifera|GRAS|GSVIVT00034603001	3e-08	26.98	55.5	628
all-unigene013102	338	Vvi038228	Vvi038228|Vitis_vinifera|bHLH|XM_002273771	3e-11	36.11	63.9	338
all-unigene013101	363	Mtr027012	Mtr027012|Medicago_truncatula|LBD|IMGA|MEDTR5G092860.1	2e-10	36.29	60.8	363
all-unigene013108	823	Osi018905	Osi018905|Oryza_sativa_subsp._indica|MYB_related|BGIOSGA022099-TA	2e-08	29.11	38.15	823
all-unigene013131	212	Cpa019405	Cpa019405|Carica_papaya|ERF|evm.TU.contig_30133.1	7e-10	49.32	59.3	212
all-unigene013160	2825	Aly018366	Aly018366|Arabidopsis_lyrata|NF-X1|fgenesh2_kg.1__1086__AT1G10170.1	0	87.29	1662	2825
all-unigene013214	416	Cre014454	Cre014454|Chlamydomonas_reinhardtii|C3H|XM_001701240	1e-08	30.83	55.5	416
all-unigene013258	668	Mgu011804	Mgu011804|Mimulus_guttatus|S1Fa-like|mgf019748m	1e-06	33.16	69.0667	668
all-unigene013259	2258	Aly016856	Aly016856|Arabidopsis_lyrata|bHLH|Al_scaffold_0004_1585	1e-87	76.215	483.5	2258
all-unigene013266	974	Mgu011804	Mgu011804|Mimulus_guttatus|S1Fa-like|mgf019748m	9e-14	29.06	74.9	974
all-unigene013280	1900	Bra000935	Bra000935|Brassica_rapa|EIL|PUT-171a-Brassica_rapa-19606;gnl|UG|Bra#S40807462	0	82.56	844	1900
all-unigene013281	346	Bna012448	Bna012448|Brassica_napus|EIL|PUT-173a-Brassica_napus-25858	2e-60	91.3	227	346
all-unigene013305	861	Rsa001751	Rsa001751|Raphanus_sativus|AP2|PUT-163a-Raphanus_sativus-3190;gnl|UG|Rsa#S41998313	2e-116	80.93	415	861
all-unigene013331	334	Aly027195	Aly027195|Arabidopsis_lyrata|GATA|fgenesh2_kg.8__1592__AT5G56860.1	4e-37	81.98	149	334
all-unigene013347	1699	Ath016405	Ath016405|Arabidopsis_thaliana|HD-ZIP|AT5G60690.1;NM_125462	0	89.44	856	1699
all-unigene013390	696	Bna018919	Bna018919|Brassica_napus|B3|PUT-173a-Brassica_napus-36387	1e-82	84.74	302	696
all-unigene013396	1686	Mgu011804	Mgu011804|Mimulus_guttatus|S1Fa-like|mgf019748m	1.5e-09	35.48	133.4	1686
all-unigene013394	711	Mgu011804	Mgu011804|Mimulus_guttatus|S1Fa-like|mgf019748m	5.00253e-10	32.5	71.65	711
all-unigene013413	285	Bdi014787	Bdi014787|Brachypodium_distachyon|G2-like|Bradi1g36240.1	4e-19	50.54	90.1	285
all-unigene013434	462	Bna003391	Bna003391|Brassica_napus|SBP|gnl|UG|Bna#S39209731;PUT-173a-Brassica_napus-67934;PUT-173a-Brassica_napus-67935	3e-45	96.45	177	462
all-unigene013505	248	Nta000199	Nta000199|Nicotiana_tabacum|WRKY|PUT-173a-Nicotiana_tabacum-98455;gnl|UG|Nta#S33577616;gnl|UG|Nta#S33577742;PUT-173a-Nicotiana_tabacum-49962	1e-18	53.66	88.2	248
all-unigene013536	3267	Zma009794	Zma009794|Zea_mays|FAR1|GRMZM2G083374_T01	0	64.96	1249	3267
all-unigene013539	2878	Ath003797	Ath003797|Arabidopsis_thaliana|WRKY|AT5G45050.1;NM_180802	8e-67	27.56	253	2878
all-unigene013540	621	Ath030085	Ath030085|Arabidopsis_thaliana|WRKY|AT4G12020.2;NM_001125496	2.66733e-09	35.5	76.7	621
all-unigene013538	333	Osj031905	Osj031905|Oryza_sativa_subsp._japonica|B3|LOC_Os07g17230.1	1.08002e-06	38.372	59.7	333
all-unigene013551	927	Smo016421	Smo016421|Selaginella_moellendorffii|C3H|estExt_Genewise1.C_730078	5e-10	25.37	62.4	927
all-unigene013630	948	Ath031159	Ath031159|Arabidopsis_thaliana|FAR1|AT3G22170.1;AT3G22170.2;NM_001125201;NM_113114	7e-145	80.56	510	948
all-unigene013737	1842	Bdi014787	Bdi014787|Brachypodium_distachyon|G2-like|Bradi1g36240.1	3e-73	34.15	273	1842
all-unigene013738	2124	Rco022349	Rco022349|Ricinus_communis|NF-X1|27791.m000083;XM_002533803	2e-119	38.95	427	2124
all-unigene013771	237	Osi037465	Osi037465|Oryza_sativa_subsp._indica|FAR1|BGIOSGA019720-TA	5e-15	48.15	76.3	237
all-unigene013860	350	Vvi010570	Vvi010570|Vitis_vinifera|LBD|GSVIVT00020863001	5e-08	25	53.1	350
all-unigene013895	309	Cnc009691	Cnc009691|Chlorella_sp._NC64A|MYB_related|estExt_fgenesh3_pg.C_240053	3e-14	40.22	73.9	309
all-unigene013914	2612	Bdi014787	Bdi014787|Brachypodium_distachyon|G2-like|Bradi1g36240.1	8e-132	41.97	468	2612
all-unigene013933	793	Aly027950	Aly027950|Arabidopsis_lyrata|bHLH|fgenesh1_pm.C_scaffold_1001571	2e-42	43.89	169	793
all-unigene013934	579	Aly027950	Aly027950|Arabidopsis_lyrata|bHLH|fgenesh1_pm.C_scaffold_1001571	1e-36	49.38	149	579
all-unigene013951	1185	Ath024427	Ath024427|Arabidopsis_thaliana|Nin-like|AT4G24020.1;NM_118534	9e-175	92.65	610	1185
all-unigene013961	888	Bna012901	Bna012901|Brassica_napus|MYB_related|PUT-173a-Brassica_napus-339148613	3e-110	76.49	209	888
all-unigene014050	330	Ath024427	Ath024427|Arabidopsis_thaliana|Nin-like|AT4G24020.1;NM_118534	2e-56	91.82	213	330
all-unigene014065	293	Ghi013563	Ghi013563|Gossypium_hirsutum|S1Fa-like|PUT-165a-Gossypium_hirsutum-55482	1.15e-10	38.42	62.35	293
all-unigene014085	815	Aly023237	Aly023237|Arabidopsis_lyrata|C3H|scaffold_502165.1	3e-124	88.54	441	815
all-unigene014086	343	Aly023237	Aly023237|Arabidopsis_lyrata|C3H|scaffold_502165.1	3e-35	74.14	143	343
all-unigene014087	396	Vvi012188	Vvi012188|Vitis_vinifera|bZIP|XM_002281039	4e-06	28.21	47	396
all-unigene014129	980	Mgu011804	Mgu011804|Mimulus_guttatus|S1Fa-like|mgf019748m	1.737e-16	36.4833	91.4167	980
all-unigene014135	992	Osj032489	Osj032489|Oryza_sativa_subsp._japonica|WRKY|NM_001075009	6e-33	31.91	138	992
all-unigene014175	582	Aly016775	Aly016775|Arabidopsis_lyrata|MYB|scaffold_502292.1	3e-54	59.51	207	582
all-unigene014238	437	Aly017825	Aly017825|Arabidopsis_lyrata|TALE|fgenesh2_kg.4__1624__AT2G35940.3	7e-54	91.34	206	437
all-unigene014236	357	Bna004249	Bna004249|Brassica_napus|TALE|PUT-173a-Brassica_napus-52849;gnl|UG|Bna#S39272952	8e-40	99.03	158	357
all-unigene014293	878	Smo020844	Smo020844|Selaginella_moellendorffii|Trihelix|fgenesh2_pg.C_scaffold_45000092	1e-08	50	57.4	878
all-unigene014328	235	Bdi016129	Bdi016129|Brachypodium_distachyon|MYB_related|Bradi2g00420.1	3e-07	34.85	50.4	235
all-unigene014337	477	Aly010076	Aly010076|Arabidopsis_lyrata|B3|scaffold_700860.1	2e-07	27.27	52	477
all-unigene014915	467	Bna024633	Bna024633|Brassica_napus|MIKC|gnl|UG|Bna#S25485462	3e-55	100	210	467
all-unigene014989	288	Aly022817	Aly022817|Arabidopsis_lyrata|CO-like|fgenesh2_kg.3__173__AT3G02380.1	9e-31	65.74	128	288
all-unigene015557	268	Tae001339	Tae001339|Triticum_aestivum|NAC|gnl|UG|Ta#S52543988	2e-06	34.41	47.8	268
all-unigene015571	256	Osi035857	Osi035857|Oryza_sativa_subsp._indica|HD-ZIP|BGIOSGA000239-TA	9e-34	77.11	138	256
all-unigene000176	641	Zma029771	Zma029771|Zea_mays|MYB_related|GRMZM2G101806_T01	8e-18	31.11	87.4	641
all-unigene000181	1095	Osj032659	Osj032659|Oryza_sativa_subsp._japonica|bZIP|NM_001072729	2e-61	35.47	233	1095
all-unigene000254	256	Aly002511	Aly002511|Arabidopsis_lyrata|G2-like|scaffold_800366.1	8e-09	39.24	55.8	256
all-unigene000372	678	Vvi026524	Vvi026524|Vitis_vinifera|GRAS|GSVIVT00001296001	2e-19	29.38	92.8	678
all-unigene000475	623	Osj050499	Osj050499|Oryza_sativa_subsp._japonica|NF-YA|NM_001054820	2e-48	52.17	188	623
all-unigene000484	356	Osj032489	Osj032489|Oryza_sativa_subsp._japonica|WRKY|NM_001075009	1e-19	45.19	92	356
all-unigene000495	358	Bna015669	Bna015669|Brassica_napus|bHLH|PUT-173a-Brassica_napus-54272	7e-18	45.86	85.9	358
all-unigene000527	421	Vvi009945	Vvi009945|Vitis_vinifera|C2H2|XM_002275364	1e-06	27.82	48.9	421
all-unigene000603	205	Vvi022854	Vvi022854|Vitis_vinifera|M-type|GSVIVT00006101001	5e-06	40.68	46.6	205
all-unigene000750	365	Rsa001609	Rsa001609|Raphanus_sativus|M-type|PUT-163a-Raphanus_sativus-18770;gnl|UG|Rsa#S42023150	2e-56	97.25	214	365
all-unigene000835	468	Rco022349	Rco022349|Ricinus_communis|NF-X1|27791.m000083;XM_002533803	5e-35	46.1	143	468
all-unigene000865	448	Osj032659	Osj032659|Oryza_sativa_subsp._japonica|bZIP|NM_001072729	5e-30	59.665	73.3	448
all-unigene000868	702	Osj033711	Osj033711|Oryza_sativa_subsp._japonica|NAC|NM_001068747	3e-09	24.31	59.3	702
all-unigene000877	962	Osj032659	Osj032659|Oryza_sativa_subsp._japonica|bZIP|NM_001072729	6e-62	37.19	234	962
all-unigene000902	329	Ghi013563	Ghi013563|Gossypium_hirsutum|S1Fa-like|PUT-165a-Gossypium_hirsutum-55482	1e-07	34.02	52	329
all-unigene001011	620	Ath012000	Ath012000|Arabidopsis_thaliana|HD-ZIP|AT1G05230.3;NM_001123759	1e-59	53.17	226	620
all-unigene001023	241	Cpa019405	Cpa019405|Carica_papaya|ERF|evm.TU.contig_30133.1	2e-12	73.51	44.3	241
all-unigene001092	318	Ghi013563	Ghi013563|Gossypium_hirsutum|S1Fa-like|PUT-165a-Gossypium_hirsutum-55482	3e-06	41.925	47.4	318
all-unigene001100	565	Osj032659	Osj032659|Oryza_sativa_subsp._japonica|bZIP|NM_001072729	2e-07	24.42	52.4	565
all-unigene001226	367	Aly007850	Aly007850|Arabidopsis_lyrata|B3|fgenesh2_kg.1__134__AT1G01030.1	3e-44	82.4	173	367
all-unigene001429	271	Osj032659	Osj032659|Oryza_sativa_subsp._japonica|bZIP|NM_001072729	1e-08	36.9	55.5	271
all-unigene001449	511	Vvi028174	Vvi028174|Vitis_vinifera|MYB_related|GSVIVT00014609001	1e-12	30.26	69.7	511
all-unigene001458	272	Bra002311	Bra002311|Brassica_rapa|NAC|PUT-171a-Brassica_rapa-25057;gnl|UG|Bra#S40794948	1e-13	94.68	88.1	272
all-unigene001490	283	Vvi009945	Vvi009945|Vitis_vinifera|C2H2|XM_002275364	1e-21	48.39	98.6	283
all-unigene001574	473	Osj032659	Osj032659|Oryza_sativa_subsp._japonica|bZIP|NM_001072729	3e-17	34.81	84.7	473
all-unigene001596	407	Ath030085	Ath030085|Arabidopsis_thaliana|WRKY|AT4G12020.2;NM_001125496	2e-06	27.43	48.1	407
all-unigene001741	212	Bna014470	Bna014470|Brassica_napus|MYB_related|PUT-173a-Brassica_napus-106710	7e-28	82.86	119	212
all-unigene001783	223	Aly007797	Aly007797|Arabidopsis_lyrata|CO-like|fgenesh2_kg.1__2783__AT1G25440.1	5e-25	73.68	109	223
all-unigene001814	210	Bna005225	Bna005225|Brassica_napus|bHLH|PUT-173a-Brassica_napus-86021;gnl|UG|Bna#S38994897	2e-36	100	147	210
all-unigene001816	264	Gma043725	Gma043725|Glycine_max|MYB|Glyma20g36600.1	7e-16	43.53	79.3	264
all-unigene001843	398	Ghi013563	Ghi013563|Gossypium_hirsutum|S1Fa-like|PUT-165a-Gossypium_hirsutum-55482	5.00001e-08	38.12	62.1	398
all-unigene001870	301	Zma013210	Zma013210|Zea_mays|NAC|GRMZM2G312201_T01	5.0575e-08	34.505	57.075	301
all-unigene001888	434	Osj032659	Osj032659|Oryza_sativa_subsp._japonica|bZIP|NM_001072729	2e-12	37.9	68.6	434
all-unigene001987	287	Bna005405	Bna005405|Brassica_napus|bHLH|PUT-173a-Brassica_napus-33265;gnl|UG|Bna#S39070701	9e-48	97.89	185	287
all-unigene002109	293	Mtr027012	Mtr027012|Medicago_truncatula|LBD|IMGA|MEDTR5G092860.1	7e-13	38.78	69.3	293
all-unigene002110	356	Pth041082	Pth041082|Populus_trichocarpa|FAR1|POPTR_0012s13550.1	2e-07	27.12	50.8	356
all-unigene002126	366	Osj032659	Osj032659|Oryza_sativa_subsp._japonica|bZIP|NM_001072729	2e-06	25.86	47.8	366
all-unigene002149	424	Zma013210	Zma013210|Zea_mays|NAC|GRMZM2G312201_T01	2.51251e-07	30.3875	65.775	424
all-unigene002163	293	Bra009400	Bra009400|Brassica_rapa|Dof|PUT-171a-Brassica_rapa-14636	3e-46	88.66	180	293
all-unigene002175	476	Gma023991	Gma023991|Glycine_max|bHLH|Glyma18g02560.1	7e-37	55.1	149	476
all-unigene002186	561	Ghi013563	Ghi013563|Gossypium_hirsutum|S1Fa-like|PUT-165a-Gossypium_hirsutum-55482	6.667e-07	37.14	54.2	561
all-unigene002196	572	Vvi022854	Vvi022854|Vitis_vinifera|M-type|GSVIVT00006101001	4e-24	39.88	108	572
all-unigene002217	237	Osj033711	Osj033711|Oryza_sativa_subsp._japonica|NAC|NM_001068747	8e-09	33.8	55.8	237
all-unigene002289	369	Osj032659	Osj032659|Oryza_sativa_subsp._japonica|bZIP|NM_001072729	8e-06	25.21	45.8	369
all-unigene002331	410	Aly010512	Aly010512|Arabidopsis_lyrata|ERF|scaffold_801806.1	6e-38	72.99	152	410
all-unigene002365	254	Bdi015813	Bdi015813|Brachypodium_distachyon|C2H2|Bradi3g01490.1	1e-06	36.71	48.5	254
all-unigene002381	229	Pth038798	Pth038798|Populus_trichocarpa|bHLH|POPTR_0002s10030.1	4e-16	66.67	80.1	229
all-unigene002390	354	Osj050499	Osj050499|Oryza_sativa_subsp._japonica|NF-YA|NM_001054820	3e-37	60.18	150	354
all-unigene002393	348	Aly002511	Aly002511|Arabidopsis_lyrata|G2-like|scaffold_800366.1	5e-08	40	36.4	348
all-unigene002422	740	Ath008809	Ath008809|Arabidopsis_thaliana|NAC|AT1G64100.2;NM_001084301	7.50075e-14	31.4375	116.75	740
all-unigene002531	679	Bna019577	Bna019577|Brassica_napus|ERF|PUT-173a-Brassica_napus-129232	6e-102	95.81	367	679
all-unigene002569	376	Osj050499	Osj050499|Oryza_sativa_subsp._japonica|NF-YA|NM_001054820	1e-09	30.23	58.5	376
all-unigene002610	323	Bra004616	Bra004616|Brassica_rapa|ERF|PUT-171a-Brassica_rapa-18198;gnl|UG|Bra#S40767625	7e-28	69.31	119	323
all-unigene002642	268	Osj050499	Osj050499|Oryza_sativa_subsp._japonica|NF-YA|NM_001054820	5e-23	55.06	102	268
all-unigene002682	272	Osj045859	Osj045859|Oryza_sativa_subsp._japonica|ERF|LOC_Os08g42550.1;NM_001068903	8e-11	32.14	62.4	272
all-unigene002731	312	Osj032659	Osj032659|Oryza_sativa_subsp._japonica|bZIP|NM_001072729	6e-12	33.98	66.2	312
all-unigene002775	529	Vvi045514	Vvi045514|Vitis_vinifera|G2-like|XM_002266153	5e-17	31.79	84.3	529
all-unigene002891	841	Osj032659	Osj032659|Oryza_sativa_subsp._japonica|bZIP|NM_001072729	4e-27	30.88	119	841
all-unigene002934	237	Bna009087	Bna009087|Brassica_napus|ZF-HD|PUT-173a-Brassica_napus-51075;PUT-173a-Brassica_napus-51076	2e-43	100	170	237
all-unigene003002	507	Ath008809	Ath008809|Arabidopsis_thaliana|NAC|AT1G64100.2;NM_001084301	2.0101e-07	30.136	82.33	507
all-unigene003014	660	Vvi004072	Vvi004072|Vitis_vinifera|GRAS|XM_002267520	2e-49	45.91	192	660
all-unigene003114	221	Ppa021061	Ppa021061|Physcomitrella_patens_subsp._patens|MYB_related|XM_001774353	2e-09	47.46	58.2	221
all-unigene003212	208	Hvu001460	Hvu001460|Hordeum_vulgare|HD-ZIP|gnl|UG|Hv#S39523205;PUT-169a-Hordeum_vulgare-82273	7e-18	68.25	85.9	208
all-unigene003219	568	Zma013210	Zma013210|Zea_mays|NAC|GRMZM2G312201_T01	5.15144e-11	27.5557	78.2857	568
all-unigene003271	256	Osi035857	Osi035857|Oryza_sativa_subsp._indica|HD-ZIP|BGIOSGA000239-TA	2e-29	85.88	124	256
all-unigene003319	346	Osj050499	Osj050499|Oryza_sativa_subsp._japonica|NF-YA|NM_001054820	2e-30	58.59	127	346
all-unigene003359	404	Osi037645	Osi037645|Oryza_sativa_subsp._indica|NAC|BGIOSGA015018-TA	2e-31	54.26	130	404
all-unigene003413	457	Pth028528	Pth028528|Populus_trichocarpa|GRAS|POPTR_0016s02770.1	1e-11	32.03	66.2	457
all-unigene003480	268	Aly017509	Aly017509|Arabidopsis_lyrata|WRKY|fgenesh1_pm.C_scaffold_7000774	2e-19	51.64	90.9	268
all-unigene003522	319	Ath008809	Ath008809|Arabidopsis_thaliana|NAC|AT1G64100.2;NM_001084301	2.6701e-06	32.57	53.9333	319
all-unigene003551	209	Bna009293	Bna009293|Brassica_napus|B3|gnl|UG|Bna#S44683047;PUT-173a-Brassica_napus-38284	3e-34	100	140	209
all-unigene003564	280	Osj032659	Osj032659|Oryza_sativa_subsp._japonica|bZIP|NM_001072729	4e-09	28.57	57	280
all-unigene003620	284	Mtr023905	Mtr023905|Medicago_truncatula|WRKY|IMGA|AC202489_11.1	5e-08	38.46	53.1	284
all-unigene003723	424	Ath026854	Ath026854|Arabidopsis_thaliana|TCP|AT3G18550.1;NM_112741	7e-19	43.48	89.7	424
all-unigene003744	443	Mtr027012	Mtr027012|Medicago_truncatula|LBD|IMGA|MEDTR5G092860.1	3e-15	27.78	77.8	443
all-unigene003902	389	Vvi010570	Vvi010570|Vitis_vinifera|LBD|GSVIVT00020863001	3.2e-07	26.1	51.6	389
all-unigene004022	312	Ath008174	Ath008174|Arabidopsis_thaliana|WRKY|AT5G49520.1;NM_124329	8e-36	80.2	145	312
all-unigene004043	530	Osj032659	Osj032659|Oryza_sativa_subsp._japonica|bZIP|NM_001072729	3e-09	30.32	58.5	530
all-unigene004134	467	Zma010212	Zma010212|Zea_mays|ZF-HD|GRMZM2G462417_T01	1.00001e-08	34.1567	76.8667	467
all-unigene004184	310	Osj033711	Osj033711|Oryza_sativa_subsp._japonica|NAC|NM_001068747	5e-11	40.66	63.2	310
all-unigene004493	318	Zma013210	Zma013210|Zea_mays|NAC|GRMZM2G312201_T01	7.55e-09	42.5625	80.425	318
all-unigene004524	541	Bdi010526	Bdi010526|Brachypodium_distachyon|Nin-like|Bradi1g45170.1	8.37001e-09	27.8233	72.2333	541
all-unigene004529	226	Osj032489	Osj032489|Oryza_sativa_subsp._japonica|WRKY|NM_001075009	4e-06	42.62	47	226
all-unigene004553	466	Osj050499	Osj050499|Oryza_sativa_subsp._japonica|NF-YA|NM_001054820	8e-12	28.66	66.6	466
all-unigene004654	269	Gma043725	Gma043725|Glycine_max|MYB|Glyma20g36600.1	1e-14	46.67	75.1	269
all-unigene004674	288	Zma040512	Zma040512|Zea_mays|NAC|GRMZM2G312201_T02	3e-20	45.16	93.6	288
all-unigene004711	212	Osj032659	Osj032659|Oryza_sativa_subsp._japonica|bZIP|NM_001072729	1e-15	48.57	78.6	212
all-unigene004729	278	Ath003979	Ath003979|Arabidopsis_thaliana|TALE|AT5G02030.1;NM_120281	4e-42	86.17	166	278
all-unigene004755	457	Vvi038204	Vvi038204|Vitis_vinifera|C3H|XM_002281419	1e-16	40.655	51.25	457
all-unigene004774	205	Ath012850	Ath012850|Arabidopsis_thaliana|CPP|AT4G29000.1;NM_119044	1e-20	71.64	95.1	205
all-unigene004777	220	Aly025952	Aly025952|Arabidopsis_lyrata|CPP|fgenesh2_kg.7__1291__AT4G29000.1	4e-26	85.07	113	220
all-unigene004778	346	Zma010212	Zma010212|Zea_mays|ZF-HD|GRMZM2G462417_T01	1.50003e-10	28.99	68.4	346
all-unigene004981	255	Osj050499	Osj050499|Oryza_sativa_subsp._japonica|NF-YA|NM_001054820	6e-14	41.67	72.8	255
all-unigene004994	248	Ath026285	Ath026285|Arabidopsis_thaliana|B3|AT4G01500.1;NM_116380	5e-22	71.95	99.8	248
all-unigene005002	202	Aly022322	Aly022322|Arabidopsis_lyrata|TALE|fgenesh2_kg.7__829__AT4G32980.1	6e-19	74.55	89.4	202
all-unigene005124	545	Ath008809	Ath008809|Arabidopsis_thaliana|NAC|AT1G64100.2;NM_001084301	1.01003e-13	30.197	91.77	545
all-unigene005167	365	Aly002899	Aly002899|Arabidopsis_lyrata|B3|scaffold_400834.1	4e-34	60.98	139	365
all-unigene005183	270	Osj055517	Osj055517|Oryza_sativa_subsp._japonica|Nin-like|LOC_Os06g12360.1	9.8763e-08	43.7025	73.025	270
all-unigene005185	310	Bna005307	Bna005307|Brassica_napus|HSF|PUT-173a-Brassica_napus-465148613;gnl|UG|Bna#S39097620	1e-33	75.25	138	310
all-unigene005267	339	Osj032489	Osj032489|Oryza_sativa_subsp._japonica|WRKY|NM_001075009	5e-06	31.91	46.6	339
all-unigene005419	261	Aly028815	Aly028815|Arabidopsis_lyrata|C2H2|fgenesh1_pg.C_scaffold_6003159	5e-35	82.76	142	261
all-unigene005644	284	Mgu011804	Mgu011804|Mimulus_guttatus|S1Fa-like|mgf019748m	7e-07	35.8	49.3	284
all-unigene005716	594	Osj032659	Osj032659|Oryza_sativa_subsp._japonica|bZIP|NM_001072729	8e-38	41.76	153	594
all-unigene005762	255	Osj032659	Osj032659|Oryza_sativa_subsp._japonica|bZIP|NM_001072729	3e-17	47.5	84	255
all-unigene005789	323	Osj050499	Osj050499|Oryza_sativa_subsp._japonica|NF-YA|NM_001054820	1e-09	31.25	58.5	323
all-unigene005975	255	Bna015200	Bna015200|Brassica_napus|NAC|PUT-173a-Brassica_napus-86406	1e-08	78.845	37.55	255
all-unigene006012	229	Zma013210	Zma013210|Zea_mays|NAC|GRMZM2G312201_T01	2.03333e-06	33.21	50.9667	229
all-unigene006246	214	Bna025637	Bna025637|Brassica_napus|B3|gnl|UG|Bna#S38941335	2e-21	85.92	97.4	214
all-unigene006334	281	Zma013210	Zma013210|Zea_mays|NAC|GRMZM2G312201_T01	5e-11	37.5	63.2	281
all-unigene006559	216	Zma013210	Zma013210|Zea_mays|NAC|GRMZM2G312201_T01	3.63333e-07	33.4933	51.7333	216
all-unigene006654	296	Osj032659	Osj032659|Oryza_sativa_subsp._japonica|bZIP|NM_001072729	1e-07	31.96	51.6	296
all-unigene006752	213	Ath014399	Ath014399|Arabidopsis_thaliana|HD-ZIP|AT4G25530.1;NM_118685	5e-13	56.94	69.7	213
all-unigene006765	329	Osj032659	Osj032659|Oryza_sativa_subsp._japonica|bZIP|NM_001072729	1e-10	34.91	62	329
all-unigene006916	238	Aly012074	Aly012074|Arabidopsis_lyrata|MYB|fgenesh2_kg.6__2630__AT5G26660.1	2e-15	59.14	77.8	238
all-unigene006981	307	Osj032659	Osj032659|Oryza_sativa_subsp._japonica|bZIP|NM_001072729	8e-06	41.13	32.5	307
all-unigene007028	302	Osj050499	Osj050499|Oryza_sativa_subsp._japonica|NF-YA|NM_001054820	8e-32	62.37	132	302
all-unigene007036	249	Ath007483	Ath007483|Arabidopsis_thaliana|bHLH|AT2G22750.1;NM_127840	1e-26	74.42	115	249
all-unigene007198	317	Osj032659	Osj032659|Oryza_sativa_subsp._japonica|bZIP|NM_001072729	3e-24	47.57	107	317
all-unigene007217	408	Bdi015813	Bdi015813|Brachypodium_distachyon|C2H2|Bradi3g01490.1	1e-09	36.545	91.1	408
all-unigene007218	262	Ath009360	Ath009360|Arabidopsis_thaliana|HD-ZIP|AT1G34650.1;NM_103188	5e-27	72.86	116	262
all-unigene007223	258	Bdi015813	Bdi015813|Brachypodium_distachyon|C2H2|Bradi3g01490.1	1.502e-08	33.295	58.7	258
all-unigene007225	336	Ath026453	Ath026453|Arabidopsis_thaliana|WRKY|AT5G45050.2;NM_123873	1e-11	36.79	65.1	336
all-unigene007389	299	Lja018734	Lja018734|Lotus_japonicus|Dof|chr4.CM0087.940.nd	3e-15	60.26	48.75	299
all-unigene007496	280	Zma010212	Zma010212|Zea_mays|ZF-HD|GRMZM2G462417_T01	3.00267e-06	26.5533	50.0333	280
all-unigene007538	237	Mgu011804	Mgu011804|Mimulus_guttatus|S1Fa-like|mgf019748m	1.505e-06	35.085	51.25	237
all-unigene007706	296	Zma010212	Zma010212|Zea_mays|ZF-HD|GRMZM2G462417_T01	3.501e-07	27.515	55.25	296
all-unigene007740	326	Osj032659	Osj032659|Oryza_sativa_subsp._japonica|bZIP|NM_001072729	8e-25	46.73	108	326
all-unigene007795	265	Bna014470	Bna014470|Brassica_napus|MYB_related|PUT-173a-Brassica_napus-106710	2e-42	90.8	167	265
all-unigene007949	255	Osj050499	Osj050499|Oryza_sativa_subsp._japonica|NF-YA|NM_001054820	1e-15	46.91	78.6	255
all-unigene007969	222	Ghi013563	Ghi013563|Gossypium_hirsutum|S1Fa-like|PUT-165a-Gossypium_hirsutum-55482	3e-07	45.45	50.4	222
all-unigene008056	257	Vvi014438	Vvi014438|Vitis_vinifera|C2H2|GSVIVT00023678001	6e-11	38.1	62.8	257
all-unigene008085	426	Vvi003579	Vvi003579|Vitis_vinifera|BES1|XM_002264315	2e-07	25.53	51.6	426
all-unigene008093	308	Aly019296	Aly019296|Arabidopsis_lyrata|C3H|fgenesh2_kg.3__2831__AT2G05160.1	1e-35	87.38	145	308
all-unigene008101	324	Zma010212	Zma010212|Zea_mays|ZF-HD|GRMZM2G462417_T01	4e-09	31.775	73.15	324
all-unigene008250	273	Zma010212	Zma010212|Zea_mays|ZF-HD|GRMZM2G462417_T01	6.66967e-10	41.18	66.2333	273
all-unigene008453	259	Osj032659	Osj032659|Oryza_sativa_subsp._japonica|bZIP|NM_001072729	2e-12	43.02	67.8	259
all-unigene008485	251	Aly013445	Aly013445|Arabidopsis_lyrata|WRKY|Al_scaffold_0008_337	8e-11	40.28	62.4	251
all-unigene008645	246	Osj055517	Osj055517|Oryza_sativa_subsp._japonica|Nin-like|LOC_Os06g12360.1	2.18501e-06	42.2717	51.6667	246
all-unigene008980	506	Osj032659	Osj032659|Oryza_sativa_subsp._japonica|bZIP|NM_001072729	5e-19	34.52	90.9	506
all-unigene009106	296	Osj032489	Osj032489|Oryza_sativa_subsp._japonica|WRKY|NM_001075009	1e-14	46.88	75.1	296
all-unigene009390	264	Osj032489	Osj032489|Oryza_sativa_subsp._japonica|WRKY|NM_001075009	3e-15	45.78	77	264
all-unigene010083	335	Osj032659	Osj032659|Oryza_sativa_subsp._japonica|bZIP|NM_001072729	5e-15	34.55	76.3	335
all-unigene011404	314	Osj055517	Osj055517|Oryza_sativa_subsp._japonica|Nin-like|LOC_Os06g12360.1	3e-20	44.76	93.6	314
all-unigene011894	303	Osj032489	Osj032489|Oryza_sativa_subsp._japonica|WRKY|NM_001075009	2e-07	27.2	51.2	303
all-unigene012459	275	Zma013210	Zma013210|Zea_mays|NAC|GRMZM2G312201_T01	3e-07	29.07	50.4	275
all-unigene014362	387	Osj050499	Osj050499|Oryza_sativa_subsp._japonica|NF-YA|NM_001054820	6e-26	43.55	112	387
all-unigene014404	270	Osj050499	Osj050499|Oryza_sativa_subsp._japonica|NF-YA|NM_001054820	6e-28	60.67	119	270
all-unigene014417	232	Ath008809	Ath008809|Arabidopsis_thaliana|NAC|AT1G64100.2;NM_001084301	5.1125e-07	37.6625	57.875	232
all-unigene014458	399	Aly002643	Aly002643|Arabidopsis_lyrata|CPP|scaffold_302728.1	6e-30	62.93	126	399
all-unigene014464	253	Osj032659	Osj032659|Oryza_sativa_subsp._japonica|bZIP|NM_001072729	5e-10	34.88	59.7	253
all-unigene014469	429	Osj032659	Osj032659|Oryza_sativa_subsp._japonica|bZIP|NM_001072729	1e-13	32.56	72.4	429
all-unigene014472	227	Bdi020164	Bdi020164|Brachypodium_distachyon|bHLH|Bradi4g32930.1	3e-12	39.19	67.4	227
all-unigene014629	496	Aly027950	Aly027950|Arabidopsis_lyrata|bHLH|fgenesh1_pm.C_scaffold_1001571	9e-31	44.72	129	496
all-unigene014653	363	Osj032489	Osj032489|Oryza_sativa_subsp._japonica|WRKY|NM_001075009	3e-18	41.53	87	363
all-unigene014661	255	Osj032659	Osj032659|Oryza_sativa_subsp._japonica|bZIP|NM_001072729	8e-06	29.17	45.8	255
all-unigene014667	302	Osi010612	Osi010612|Oryza_sativa_subsp._indica|C2H2|BGIOSGA028421-TA	2e-16	43	81.3	302
all-unigene014668	309	Bdi015813	Bdi015813|Brachypodium_distachyon|C2H2|Bradi3g01490.1	2e-08	32.63	54.7	309
all-unigene014669	256	Ath005721	Ath005721|Arabidopsis_thaliana|HD-ZIP|AT4G17710.1;NM_117880	4e-28	75.29	119	256
all-unigene014704	310	Zma010212	Zma010212|Zea_mays|ZF-HD|GRMZM2G462417_T01	1e-11	34	65.1	310
all-unigene014820	247	Nta000199	Nta000199|Nicotiana_tabacum|WRKY|PUT-173a-Nicotiana_tabacum-98455;gnl|UG|Nta#S33577616;gnl|UG|Nta#S33577742;PUT-173a-Nicotiana_tabacum-49962	5e-08	31.11	53.1	247
all-unigene014862	215	Zma013210	Zma013210|Zea_mays|NAC|GRMZM2G312201_T01	9e-07	44.355	34.25	215
all-unigene014866	267	Vvi022854	Vvi022854|Vitis_vinifera|M-type|GSVIVT00006101001	2e-11	45.78	64.7	267
all-unigene014923	273	Ghi013563	Ghi013563|Gossypium_hirsutum|S1Fa-like|PUT-165a-Gossypium_hirsutum-55482	2e-08	36.9	54.3	273
all-unigene014993	207	Osj032489	Osj032489|Oryza_sativa_subsp._japonica|WRKY|NM_001075009	2e-10	48.39	60.8	207
all-unigene015001	220	Osj032659	Osj032659|Oryza_sativa_subsp._japonica|bZIP|NM_001072729	1e-15	47.825	49.5	220
all-unigene015047	252	Osi034216	Osi034216|Oryza_sativa_subsp._indica|C3H|BGIOSGA023566-TA	5e-08	42.5	53.1	252
all-unigene015051	236	Osj032659	Osj032659|Oryza_sativa_subsp._japonica|bZIP|NM_001072729	2e-16	47.44	81.3	236
all-unigene015096	206	Tae001339	Tae001339|Triticum_aestivum|NAC|gnl|UG|Ta#S52543988	7e-07	44.64	49.3	206
all-unigene015248	216	Osj050499	Osj050499|Oryza_sativa_subsp._japonica|NF-YA|NM_001054820	2e-12	45.59	67.8	216
all-unigene018743	313	Aly005194	Aly005194|Arabidopsis_lyrata|WRKY|fgenesh2_kg.97__1__AT5G43290.1	1e-22	55.34	102	313
all-unigene021025	335	Ath030085	Ath030085|Arabidopsis_thaliana|WRKY|AT4G12020.2;NM_001125496	2e-11	37.27	64.3	335
all-unigene031246	256	Osj032489	Osj032489|Oryza_sativa_subsp._japonica|WRKY|NM_001075009	2e-20	51.19	94.4	256
all-unigene031473	204	Mgu011804	Mgu011804|Mimulus_guttatus|S1Fa-like|mgf019748m	3.025e-06	40.785	49.65	204
all-unigene031510	348	Ath019290	Ath019290|Arabidopsis_thaliana|bHLH|AT1G10610.1;NM_100937	4e-36	68.55	146	348
all-unigene031742	816	Bdi010526	Bdi010526|Brachypodium_distachyon|Nin-like|Bradi1g45170.1	2e-06	28.63	105	816
all-unigene016024	364	Ath001804	Ath001804|Arabidopsis_thaliana|NF-X1|AT1G10170.1;NM_100891	9e-50	75	191	364
all-unigene016121	211	Osi026251	Osi026251|Oryza_sativa_subsp._indica|WRKY|BGIOSGA022298-TA	2e-07	44.93	51.2	211
all-unigene016596	575	Vvi028174	Vvi028174|Vitis_vinifera|MYB_related|GSVIVT00014609001	2e-09	30.43	59.3	575
all-unigene016597	477	Osj032659	Osj032659|Oryza_sativa_subsp._japonica|bZIP|NM_001072729	4e-14	31.08	74.3	477
all-unigene016622	437	Mgu011804	Mgu011804|Mimulus_guttatus|S1Fa-like|mgf019748m	3.5e-12	31.935	67.6	437
all-unigene016758	922	Mgu011804	Mgu011804|Mimulus_guttatus|S1Fa-like|mgf019748m	6.00006e-08	31.944	68.02	922
all-unigene016809	318	Zma013210	Zma013210|Zea_mays|NAC|GRMZM2G312201_T01	1.38012e-07	33.2	62.02	318
all-unigene016831	579	Osj032659	Osj032659|Oryza_sativa_subsp._japonica|bZIP|NM_001072729	2e-12	28.26	69.3	579
all-unigene017015	368	Ath030085	Ath030085|Arabidopsis_thaliana|WRKY|AT4G12020.2;NM_001125496	3e-07	39.56	35.05	368
all-unigene018785	424	Rsa002016	Rsa002016|Raphanus_sativus|B3|PUT-163a-Raphanus_sativus-4894;gnl|UG|Rsa#S42044253	3e-33	58.87	137	424
all-unigene018926	405	Zma013210	Zma013210|Zea_mays|NAC|GRMZM2G312201_T01	1.83383e-06	35.29	64.2	405
all-unigene019479	295	Ghi013563	Ghi013563|Gossypium_hirsutum|S1Fa-like|PUT-165a-Gossypium_hirsutum-55482	2e-11	44.44	64.3	295
all-unigene019975	224	Zma013210	Zma013210|Zea_mays|NAC|GRMZM2G312201_T01	6.595e-07	31.615	51.8	224
all-unigene020664	323	Vvi001751	Vvi001751|Vitis_vinifera|Trihelix|GSVIVT00021711001	2e-07	31.46	51.2	323
all-unigene030880	299	Osj050499	Osj050499|Oryza_sativa_subsp._japonica|NF-YA|NM_001054820	6e-06	26.67	46.2	299
all-unigene031008	249	Bna019577	Bna019577|Brassica_napus|ERF|PUT-173a-Brassica_napus-129232	2.65e-16	100	81.65	249
all-unigene031289	454	Vvi004072	Vvi004072|Vitis_vinifera|GRAS|XM_002267520	2e-12	35.76	68.6	454
all-unigene031410	256	Ath005721	Ath005721|Arabidopsis_thaliana|HD-ZIP|AT4G17710.1;NM_117880	4e-31	76.47	129	256
all-unigene031526	234	Zma040512	Zma040512|Zea_mays|NAC|GRMZM2G312201_T02	6e-19	50	89.4	234
all-unigene031529	330	Vvi004072	Vvi004072|Vitis_vinifera|GRAS|XM_002267520	4e-16	40.74	80.1	330
all-unigene031551	391	Ath020877	Ath020877|Arabidopsis_thaliana|bHLH|AT5G53210.1;NM_124700	5e-28	74.05	119	391
all-unigene031576	642	Osj032659	Osj032659|Oryza_sativa_subsp._japonica|bZIP|NM_001072729	2e-29	36.13	126	642
all-unigene031659	204	Bna000619	Bna000619|Brassica_napus|MIKC|PUT-173a-Brassica_napus-59256;PUT-173a-Brassica_napus-59255;PUT-173a-Brassica_napus-18866;gnl|UG|Bna#S52588601;PUT-173a-Brassica_napus-18865	3e-33	100	136	204
all-unigene031668	210	Osj032659	Osj032659|Oryza_sativa_subsp._japonica|bZIP|NM_001072729	3e-09	38.24	57	210
all-unigene031726	252	Osj050499	Osj050499|Oryza_sativa_subsp._japonica|NF-YA|NM_001054820	4e-08	46.05	53.5	252
all-unigene031808	290	Zma010212	Zma010212|Zea_mays|ZF-HD|GRMZM2G462417_T01	3.5e-08	32.025	63.2	290
all-unigene031851	351	Bra010845	Bra010845|Brassica_rapa|ZF-HD|gnl|UG|Bra#S40761231	5e-55	92.31	209	351
all-unigene031895	327	Ath007842	Ath007842|Arabidopsis_thaliana|HD-ZIP|AT5G46880.1;NM_124059	3e-37	77.78	150	327
all-unigene031905	226	Osj033711	Osj033711|Oryza_sativa_subsp._japonica|NAC|NM_001068747	7e-07	30.56	49.3	226
all-unigene031952	835	Vvi004072	Vvi004072|Vitis_vinifera|GRAS|XM_002267520	2e-40	36.78	162	835
all-unigene031957	613	Osj050499	Osj050499|Oryza_sativa_subsp._japonica|NF-YA|NM_001054820	3e-39	37.56	158	613
all-unigene031990	619	Mgu011804	Mgu011804|Mimulus_guttatus|S1Fa-like|mgf019748m	1.2e-08	32.36	57.35	619
all-unigene015641	340	Osj032659	Osj032659|Oryza_sativa_subsp._japonica|bZIP|NM_001072729	4e-06	33.68	47	340
all-unigene015701	344	Ath030085	Ath030085|Arabidopsis_thaliana|WRKY|AT4G12020.2;NM_001125496	1e-12	37.17	68.6	344
all-unigene015728	205	Zma010212	Zma010212|Zea_mays|ZF-HD|GRMZM2G462417_T01	1e-06	35.71	48.5	205
all-unigene015730	215	Rsa005516	Rsa005516|Raphanus_sativus|WRKY|PUT-163a-Raphanus_sativus-2065	2e-26	93.22	114	215
all-unigene015747	225	Osj050499	Osj050499|Oryza_sativa_subsp._japonica|NF-YA|NM_001054820	6e-23	58.9	102	225
all-unigene015805	204	Ath008809	Ath008809|Arabidopsis_thaliana|NAC|AT1G64100.2;NM_001084301	6e-06	48.39	46.2	204
all-unigene015809	252	Bna021839	Bna021839|Brassica_napus|G2-like|PUT-173a-Brassica_napus-44090	5e-35	100	142	252
all-unigene015814	235	Vvi004072	Vvi004072|Vitis_vinifera|GRAS|XM_002267520	3e-06	45.33	47.4	235
all-unigene015819	221	Zma010212	Zma010212|Zea_mays|ZF-HD|GRMZM2G462417_T01	2e-07	34.25	51.2	221
all-unigene015837	215	Gma043725	Gma043725|Glycine_max|MYB|Glyma20g36600.1	5e-14	48.57	73.2	215
all-unigene015856	282	Bra008695	Bra008695|Brassica_rapa|ZF-HD|PUT-171a-Brassica_rapa-5916	5e-19	72.32	119.1	282
all-unigene015918	495	Aly002511	Aly002511|Arabidopsis_lyrata|G2-like|scaffold_800366.1	2e-17	34.38	85.1	495
all-unigene015922	210	Osj032659	Osj032659|Oryza_sativa_subsp._japonica|bZIP|NM_001072729	2e-06	34.29	48.1	210
all-unigene015967	256	Osj032659	Osj032659|Oryza_sativa_subsp._japonica|bZIP|NM_001072729	6e-17	40.48	82.8	256
all-unigene015986	202	Ghi013563	Ghi013563|Gossypium_hirsutum|S1Fa-like|PUT-165a-Gossypium_hirsutum-55482	4e-06	36.92	47	202
all-unigene015995	213	Osj050499	Osj050499|Oryza_sativa_subsp._japonica|NF-YA|NM_001054820	3e-06	38.6	47.4	213
all-unigene016000	205	Zma013210	Zma013210|Zea_mays|NAC|GRMZM2G312201_T01	1.504e-13	50.745	74.75	205
all-unigene016033	258	Vvi004072	Vvi004072|Vitis_vinifera|GRAS|XM_002267520	1e-15	41.86	78.2	258
all-unigene016101	365	Aly015089	Aly015089|Arabidopsis_lyrata|NAC|fgenesh2_kg.8__135__AT5G46590.1	3e-66	94.21	246	365
all-unigene016112	269	Bdi014787	Bdi014787|Brachypodium_distachyon|G2-like|Bradi1g36240.1	1e-07	33.68	52	269
all-unigene016119	274	Bdi015813	Bdi015813|Brachypodium_distachyon|C2H2|Bradi3g01490.1	7e-10	35.56	59.3	274
all-unigene016156	276	Mrc003971	Mrc003971|Micromonas_sp._RCC299|C3H|EuGene.0900010205;XM_002504493	3e-15	43.96	77	276
all-unigene016171	236	Ath008809	Ath008809|Arabidopsis_thaliana|NAC|AT1G64100.2;NM_001084301	1.15011e-06	37.93	54.575	236
all-unigene016203	202	Ghi013563	Ghi013563|Gossypium_hirsutum|S1Fa-like|PUT-165a-Gossypium_hirsutum-55482	4e-06	44.83	47	202
all-unigene016212	299	Zma021478	Zma021478|Zea_mays|HB-other|GRMZM2G021475_T01	3e-14	42.86	73.9	299
all-unigene016213	257	Vvi009945	Vvi009945|Vitis_vinifera|C2H2|XM_002275364	2e-20	48.15	94.4	257
all-unigene016221	209	Ath027941	Ath027941|Arabidopsis_thaliana|Trihelix|AT3G24860.1;NM_113398	3e-12	74.65	43.7	209
all-unigene016284	248	Osj050499	Osj050499|Oryza_sativa_subsp._japonica|NF-YA|NM_001054820	9e-07	44.3	34.3	248
all-unigene016300	285	Tae001339	Tae001339|Triticum_aestivum|NAC|gnl|UG|Ta#S52543988	3e-11	38.3	63.9	285
all-unigene016418	317	Ath008809	Ath008809|Arabidopsis_thaliana|NAC|AT1G64100.2;NM_001084301	1.28955e-07	34.2362	65.7	317
all-unigene016450	314	Zma010212	Zma010212|Zea_mays|ZF-HD|GRMZM2G462417_T01	1.005e-09	30.77	61.65	314
all-unigene016464	296	Ath008809	Ath008809|Arabidopsis_thaliana|NAC|AT1G64100.2;NM_001084301	4.78758e-07	32.2137	60.2375	296
all-unigene016491	438	Aly029554	Aly029554|Arabidopsis_lyrata|LBD|fgenesh2_kg.2__796__AT1G65620.2	4e-76	95.86	280	438
all-unigene016580	668	Mtr031684	Mtr031684|Medicago_truncatula|MYB_related|IMGA|MEDTR1G106300.1	1e-64	68.83	132	668
all-unigene016644	403	Osi011490	Osi011490|Oryza_sativa_subsp._indica|NAC|BGIOSGA034756-TA	2e-11	31.39	65.1	403
all-unigene016705	497	Gma043725	Gma043725|Glycine_max|MYB|Glyma20g36600.1	1e-23	40.29	105	497
all-unigene016715	339	Ath030085	Ath030085|Arabidopsis_thaliana|WRKY|AT4G12020.2;NM_001125496	3e-09	36.19	57	339
all-unigene016992	560	Osi019833	Osi019833|Oryza_sativa_subsp._indica|ERF|BGIOSGA029071-TA	3e-19	34.68	91.7	560
all-unigene017023	699	Osj032489	Osj032489|Oryza_sativa_subsp._japonica|WRKY|NM_001075009	1e-37	37.07	153	699
all-unigene017055	544	Vvi026524	Vvi026524|Vitis_vinifera|GRAS|GSVIVT00001296001	6e-12	22.92	67.4	544
all-unigene017064	1390	Ath026453	Ath026453|Arabidopsis_thaliana|WRKY|AT5G45050.2;NM_123873	1e-123	54.24	440	1390
all-unigene017070	933	Ath007486	Ath007486|Arabidopsis_thaliana|CO-like|AT5G15840.1;NM_121589	4e-105	69.06	378	933
all-unigene017165	400	Bna013376	Bna013376|Brassica_napus|C3H|PUT-173a-Brassica_napus-66133	9e-52	87.29	198	400
all-unigene017166	371	Bna013313	Bna013313|Brassica_napus|C3H|PUT-173a-Brassica_napus-16642	7e-47	86.36	182	371
all-unigene017192	207	Bna009675	Bna009675|Brassica_napus|MYB|PUT-173a-Brassica_napus-78127;PUT-173a-Brassica_napus-78128	2e-28	79.73	120	207
all-unigene017225	665	Bna025306	Bna025306|Brassica_napus|ERF|PUT-173a-Brassica_napus-50720	8e-90	99.47	326	665
all-unigene017251	718	Osj032659	Osj032659|Oryza_sativa_subsp._japonica|bZIP|NM_001072729	1e-10	26.77	41.05	718
all-unigene017412	417	Mgu011804	Mgu011804|Mimulus_guttatus|S1Fa-like|mgf019748m	3.51e-13	37.785	74.15	417
all-unigene017463	487	Ath030085	Ath030085|Arabidopsis_thaliana|WRKY|AT4G12020.2;NM_001125496	5e-12	30.64	67.4	487
all-unigene017481	258	Bna018898	Bna018898|Brassica_napus|MIKC|PUT-173a-Brassica_napus-18247	3e-40	94.05	160	258
all-unigene017486	624	Osi026251	Osi026251|Oryza_sativa_subsp._indica|WRKY|BGIOSGA022298-TA	7e-08	28.23	54.3	624
all-unigene017491	316	Mgu011804	Mgu011804|Mimulus_guttatus|S1Fa-like|mgf019748m	4.5e-11	41.305	63.95	316
all-unigene017553	712	Aly027950	Aly027950|Arabidopsis_lyrata|bHLH|fgenesh1_pm.C_scaffold_1001571	7e-10	23.01	61.2	712
all-unigene017589	632	Aly028259	Aly028259|Arabidopsis_lyrata|Trihelix|Al_scaffold_0004_2382	1e-53	76.56	206	632
all-unigene017624	343	Vvi004072	Vvi004072|Vitis_vinifera|GRAS|XM_002267520	2e-35	60	144	343
all-unigene017627	943	Aly027950	Aly027950|Arabidopsis_lyrata|bHLH|fgenesh1_pm.C_scaffold_1001571	1.5005e-11	27.08	72.2	943
all-unigene017658	263	Vvi004072	Vvi004072|Vitis_vinifera|GRAS|XM_002267520	3e-16	46.59	80.5	263
all-unigene017675	630	Vvi009945	Vvi009945|Vitis_vinifera|C2H2|XM_002275364	2e-39	37.8	159	630
all-unigene017695	556	Zma013210	Zma013210|Zea_mays|NAC|GRMZM2G312201_T01	6.73857e-09	27.9471	67.9286	556
all-unigene017741	571	Aly011196	Aly011196|Arabidopsis_lyrata|Nin-like|Al_scaffold_0005_2880	2e-76	80.88	281	571
all-unigene017803	680	Ath030085	Ath030085|Arabidopsis_thaliana|WRKY|AT4G12020.2;NM_001125496	4e-38	37.34	154	680
all-unigene017832	374	Bdi017962	Bdi017962|Brachypodium_distachyon|bHLH|Bradi2g44120.1	4e-06	27.2	47	374
all-unigene017894	278	Vvi022780	Vvi022780|Vitis_vinifera|Trihelix|GSVIVT00038528001	4e-17	40.22	83.2	278
all-unigene017914	2787	Ath004778	Ath004778|Arabidopsis_thaliana|bHLH|AT1G12860.1;NM_101157	4e-37	33.64	154	2787
all-unigene017926	555	Zma010212	Zma010212|Zea_mays|ZF-HD|GRMZM2G462417_T01	1e-11	35.6933	102.367	555
all-unigene018032	1071	Osj050499	Osj050499|Oryza_sativa_subsp._japonica|NF-YA|NM_001054820	1e-57	33.98	220	1071
all-unigene018057	754	Ath028434	Ath028434|Arabidopsis_thaliana|MYB_related|AT1G07540.1;NM_100628	2e-115	81.3	411	754
all-unigene018149	325	Aly031281	Aly031281|Arabidopsis_lyrata|MYB_related|Al_scaffold_0001_698	1e-28	57.66	121	325
all-unigene018160	234	Ghi013563	Ghi013563|Gossypium_hirsutum|S1Fa-like|PUT-165a-Gossypium_hirsutum-55482	1.55e-07	37.47	52.75	234
all-unigene018226	206	Zma013210	Zma013210|Zea_mays|NAC|GRMZM2G312201_T01	1.0004e-07	40.7367	59.0333	206
all-unigene018233	607	Ath003752	Ath003752|Arabidopsis_thaliana|bHLH|AT5G46690.1;NM_124039	7e-51	80.86	197	607
all-unigene018246	1226	Vvi022854	Vvi022854|Vitis_vinifera|M-type|GSVIVT00006101001	1e-50	37.46	197	1226
all-unigene018261	298	Mtr023905	Mtr023905|Medicago_truncatula|WRKY|IMGA|AC202489_11.1	2e-10	38.71	60.8	298
all-unigene018284	241	Vvi033786	Vvi033786|Vitis_vinifera|C2H2|XM_002266705	1e-07	39.24	51.6	241
all-unigene018285	297	Vvi033786	Vvi033786|Vitis_vinifera|C2H2|XM_002266705	4e-06	34.04	47	297
all-unigene018295	295	Osj032659	Osj032659|Oryza_sativa_subsp._japonica|bZIP|NM_001072729	1e-23	49.48	105	295
all-unigene018300	827	Osj032659	Osj032659|Oryza_sativa_subsp._japonica|bZIP|NM_001072729	4e-37	33.93	85.15	827
all-unigene018330	232	Aly022249	Aly022249|Arabidopsis_lyrata|CAMTA|fgenesh1_pm.C_scaffold_2000778	6e-36	92.5	145	232
all-unigene018341	619	Aly004395	Aly004395|Arabidopsis_lyrata|ERF|fgenesh2_kg.8__388__AT5G44210.1	1e-54	69.73	209	619
all-unigene018415	1417	Mgu011804	Mgu011804|Mimulus_guttatus|S1Fa-like|mgf019748m	6.402e-11	33.18	78.58	1417
all-unigene018444	656	Vvi028174	Vvi028174|Vitis_vinifera|MYB_related|GSVIVT00014609001	3e-09	23.18	58.9	656
all-unigene018458	574	Osj033711	Osj033711|Oryza_sativa_subsp._japonica|NAC|NM_001068747	2e-09	28.26	59.3	574
all-unigene018471	218	Ath008809	Ath008809|Arabidopsis_thaliana|NAC|AT1G64100.2;NM_001084301	3.07182e-07	35.2255	55.1364	218
all-unigene018518	745	Osj050499	Osj050499|Oryza_sativa_subsp._japonica|NF-YA|NM_001054820	9e-54	41.02	207	745
all-unigene018521	231	Aly022698	Aly022698|Arabidopsis_lyrata|MYB_related|fgenesh2_kg.1__1907__AT1G17460.1	7e-23	64.29	102	231
all-unigene018545	224	Zma013210	Zma013210|Zea_mays|NAC|GRMZM2G312201_T01	1.55013e-07	43.555	59.525	224
all-unigene018548	558	Vvi022854	Vvi022854|Vitis_vinifera|M-type|GSVIVT00006101001	1e-25	35.84	113	558
all-unigene018549	402	Vvi022854	Vvi022854|Vitis_vinifera|M-type|GSVIVT00006101001	4e-11	30.63	63.9	402
all-unigene018595	251	Bdi001982	Bdi001982|Brachypodium_distachyon|MYB|Bradi1g30250.1	3e-12	45.83	67.4	251
all-unigene018679	682	Ath009360	Ath009360|Arabidopsis_thaliana|HD-ZIP|AT1G34650.1;NM_103188	2e-76	65.04	282	682
all-unigene018681	423	Ath008809	Ath008809|Arabidopsis_thaliana|NAC|AT1G64100.2;NM_001084301	2e-06	25	48.1	423
all-unigene018710	390	Aly027950	Aly027950|Arabidopsis_lyrata|bHLH|fgenesh1_pm.C_scaffold_1001571	5e-09	29.37	56.6	390
all-unigene018727	421	Osj032659	Osj032659|Oryza_sativa_subsp._japonica|bZIP|NM_001072729	8e-15	32.61	76.3	421
all-unigene018763	309	Bna013121	Bna013121|Brassica_napus|AP2|PUT-173a-Brassica_napus-4817	8e-25	74.29	108	309
all-unigene018769	277	Bra012760	Bra012760|Brassica_rapa|WRKY|gnl|UG|Bra#S39414144	3e-34	93.59	140	277
all-unigene018776	428	Ath011066	Ath011066|Arabidopsis_thaliana|bHLH|AT3G57800.1;NM_115642	3e-37	68.42	150	428
all-unigene018809	608	Vvi014438	Vvi014438|Vitis_vinifera|C2H2|GSVIVT00023678001	9e-35	43.55	143	608
all-unigene018814	374	Osj050499	Osj050499|Oryza_sativa_subsp._japonica|NF-YA|NM_001054820	1e-25	46.15	111	374
all-unigene018877	307	Osj050499	Osj050499|Oryza_sativa_subsp._japonica|NF-YA|NM_001054820	1e-12	40.66	68.2	307
all-unigene018911	298	Rsa004087	Rsa004087|Raphanus_sativus|WRKY|PUT-163a-Raphanus_sativus-3183;gnl|UG|Rsa#S42021259	4e-41	91	162	298
all-unigene018925	1015	Aly007913	Aly007913|Arabidopsis_lyrata|HSF|Al_scaffold_0002_1461	1e-109	72.79	393	1015
all-unigene018961	1130	Sbi024712	Sbi024712|Sorghum_bicolor|WRKY|Sb02g008880;XM_002459646	8e-10	23.85	62	1130
all-unigene018962	211	Bra002576	Bra002576|Brassica_rapa|ERF|PUT-171a-Brassica_rapa-38439;gnl|UG|Bra#S40718755	2e-15	91.43	77.4	211
all-unigene018979	388	Osj032659	Osj032659|Oryza_sativa_subsp._japonica|bZIP|NM_001072729	2e-28	47.2	121	388
all-unigene018983	594	Aly029345	Aly029345|Arabidopsis_lyrata|bHLH|fgenesh2_kg.1__1138__AT1G10610.1	1.33333e-16	66.7833	70.4333	594
all-unigene019022	333	Bdi014787	Bdi014787|Brachypodium_distachyon|G2-like|Bradi1g36240.1	2e-13	36.84	71.2	333
all-unigene019058	226	Aly029824	Aly029824|Arabidopsis_lyrata|bHLH|scaffold_403077.1	3e-24	69.32	107	226
all-unigene019059	305	Osi002845	Osi002845|Oryza_sativa_subsp._indica|MYB_related|BGIOSGA035841-TA	4e-09	34.62	56.6	305
all-unigene019072	361	Osj032659	Osj032659|Oryza_sativa_subsp._japonica|bZIP|NM_001072729	1e-22	43.86	101	361
all-unigene019073	364	Osj032659	Osj032659|Oryza_sativa_subsp._japonica|bZIP|NM_001072729	3e-25	45	110	364
all-unigene019079	372	Ath020341	Ath020341|Arabidopsis_thaliana|MYB|AT5G07690.1;NM_120851	3e-25	68.33	110	372
[truncated: 6,795 more rows]

## Sheet: 3
Additional file 5.3: Complete list of all-unigenes with TCDB annotations
[truncated: 2,564 more rows]
