# Supplementary material for: Comparative Transcriptome Analysis of Leaves and Roots in Response to Sudden Increase in Salinity in Brassica napus by RNA-seq
Source: Biomed Res Int. 2014 Aug 7;2014:467395. doi: 10.1155/2014/467395 (PMC4142189; doi:10.1155/2014/467395)
Supplement: Supplementary file 1 — is primer pair for qRT-PCR analysis. Supplementary file 2 indicates expression fold change of salt responsive gene markers in B. napus. Supplementary file 3 and 4 are tables indicating summary of sequencing output and statistics for the unigene of B. napus assembled by SOAPdenovo, respectively. Supplementary file 5 reveals annotations of all-unigenes. Supplementary file 6 is a graph depicting length distribution of the all-unigenes with SwissProt or NR annotations. Supplementary file 7 and 8 are GO and KEGG ontology classifications of all-unigenes, respectively. Supplementary file 9 shows comparison of transcription factor families between B. napus, Arabidopsis and B. rapa. Supplementary file 10 indicates log2 fold-changes of DEGs in the leaves and the roots at 1h and 12h. Supplementary file 11 shows Venn diagrams depicting number of DEGs regulated in the leaves and the roots of B. napus. Supplementary file 12 shows the result of validation of DEGs by semi-qRT-PCR. Supplementary file 13 shows the comparison of expression fold-change for DEGs between N119 and Kirariboshi. Supplementary file 14 lists all over-represented GO terms in DEGs. Supplementary file 15, 16 and 17 indicate comparison of over-represented GO terms of “Biological Process”, “Molecular Function”, and “Cellular Component”, respectively in the leaves and the roots at 1h and 12h after stress. Supplementary file 18 lists all over-represented KEGG ontology in DEGs. [file 467395.f1.zip › 467395.f1/Additional file 9.xlsx]

## Sheet: Sheet1
Additional file 9: Comparison of transcription factor families between B. napus, Arabidopsis and B. rapa.
Transcription factor family	Brassica napus		Arabidopsis thaliana		Brassica rapa
	No. of gene	%	No. of gene	%	No. of gene	%
NAC	935	12.2079	135	6.67656	44	6.08575
WRKY	854	11.1503	89	4.40158	40	5.5325
bZIP	573	7.48139	101	4.99505	39	5.39419
bHLH	527	6.88079	194	9.59446	53	7.33057
MYB_related	409	5.34012	85	4.20376	48	6.639
S1Fa-like	377	4.92231	4	0.197824	3	0.414938
MYB	360	4.70035	159	7.8635	26	3.59613
C2H2	348	4.54367	104	5.14342	32	4.426
GRAS	310	4.04753	36	1.78042	18	2.48963
G2-like	246	3.21191	55	2.72008	20	2.76625
NF-YA	245	3.19885	15	0.74184	10	1.38313
C3H	240	3.13357	56	2.76954	23	3.18119
Nin-like	194	2.53297	14	0.692384	3	0.414938
ERF	192	2.50685	132	6.52819	79	10.9267
ZF-HD	181	2.36323	17	0.840752	9	1.24481
B3	143	1.86708	71	3.51137	22	3.04288
HD-ZIP	139	1.81486	56	2.76954	16	2.213
Trihelix	139	1.81486	33	1.63205	18	2.48963
M-type	119	1.55373	73	3.61029	2	0.276625
FAR1	93	1.21426	20	0.98912	3	0.414938
LBD	77	1.00535	43	2.12661	12	1.65975
ARF	73	0.953127	32	1.58259	3	0.414938
Dof	69	0.900901	43	2.12661	11	1.52144
HB-other	64	0.835618	8	0.395648	6	0.829876
GATA	54	0.705053	31	1.53314	17	2.35131
AP2	51	0.665883	25	1.2364	10	1.38313
SBP	51	0.665883	18	0.890208	4	0.55325
NF-X1	50	0.652827	2	0.098912		0
HSF	47	0.613657	25	1.2364	12	1.65975
TALE	47	0.613657	23	1.13749	5	0.691563
MIKC	41	0.535318	66	3.26409	26	3.59613
CAMTA	36	0.470035	7	0.346192		0
GRF	34	0.443922	9	0.445104	1	0.138313
TCP	31	0.404753	28	1.38477	16	2.213
CPP	29	0.37864	10	0.49456		0
ARR-B	26	0.33947	16	0.791296	3	0.414938
GeBP	26	0.33947	23	1.13749	9	1.24481
NF-YC	24	0.313357	15	0.74184	7	0.968188
EIL	22	0.287244	6	0.296736	3	0.414938
BES1	21	0.274187	8	0.395648	7	0.968188
SRS	21	0.274187	12	0.593472	6	0.829876
CO-like	20	0.261131	19	0.939664	6	0.829876
WOX	19	0.248074	17	0.840752	3	0.414938
DBB	13	0.169735	12	0.593472	12	1.65975
NF-YB	13	0.169735	19	0.939664	12	1.65975
E2F/DP	12	0.156678	12	0.593472	3	0.414938
BBR/BPC	11	0.143622	11	0.544016	7	0.968188
HB-PHD	11	0.143622	2	0.098912		0
Whirly	8	0.104452	4	0.197824	2	0.276625
RAV	7	0.0913957	6	0.296736	4	0.55325
SAP	7	0.0913957	1	0.049456		0
LSD	5	0.0652827	6	0.296736	2	0.276625
STAT	4	0.0522261	2	0.098912		0
HRT-like	3	0.0391696	2	0.098912		0
NZZ/SPL	3	0.0391696	1	0.049456		0
YABBY	3	0.0391696	7	0.346192	5	0.691563
VOZ	2	0.0261131	2	0.098912	1	0.138313
Total	7659	100	2022	100	723	100
