# Supplementary material for: Comparative Transcriptome Analysis of Leaves and Roots in Response to Sudden Increase in Salinity in Brassica napus by RNA-seq
Source: Biomed Res Int. 2014 Aug 7;2014:467395. doi: 10.1155/2014/467395 (PMC4142189; doi:10.1155/2014/467395)
Supplement: Supplementary file 1 — is primer pair for qRT-PCR analysis. Supplementary file 2 indicates expression fold change of salt responsive gene markers in B. napus. Supplementary file 3 and 4 are tables indicating summary of sequencing output and statistics for the unigene of B. napus assembled by SOAPdenovo, respectively. Supplementary file 5 reveals annotations of all-unigenes. Supplementary file 6 is a graph depicting length distribution of the all-unigenes with SwissProt or NR annotations. Supplementary file 7 and 8 are GO and KEGG ontology classifications of all-unigenes, respectively. Supplementary file 9 shows comparison of transcription factor families between B. napus, Arabidopsis and B. rapa. Supplementary file 10 indicates log2 fold-changes of DEGs in the leaves and the roots at 1h and 12h. Supplementary file 11 shows Venn diagrams depicting number of DEGs regulated in the leaves and the roots of B. napus. Supplementary file 12 shows the result of validation of DEGs by semi-qRT-PCR. Supplementary file 13 shows the comparison of expression fold-change for DEGs between N119 and Kirariboshi. Supplementary file 14 lists all over-represented GO terms in DEGs. Supplementary file 15, 16 and 17 indicate comparison of over-represented GO terms of “Biological Process”, “Molecular Function”, and “Cellular Component”, respectively in the leaves and the roots at 1h and 12h after stress. Supplementary file 18 lists all over-represented KEGG ontology in DEGs. [file 467395.f1.zip › 467395.f1/Additional file 10.xlsx]

## Sheet: Sheet1
Additional file 10: Log2 fold-changes of DEGs in the leaves and the roots of B. napus at 1 h and 12 h
Gene_ID	Fold change (Leaf_1hour_200mM/Leaf_1hour_0mM)		Fold change (Leaf_12hour_200mM/Leaf_12hour_0mM)		Fold change (Root_1hour_200mM/Root_1hour_0mM)		Fold change (Root_12hour_200mM/Root_12hour_0mM)
	log2FC	FDR	log2FC	FDR	log2FC	FDR	log2FC	FDR
all-unigene000001	#N/A	#N/A	#N/A	#N/A	#N/A	#N/A	#N/A	#N/A
all-unigene000002	-7.62922	0.739393	-6.67935	0.86949	#N/A	#N/A	#N/A	#N/A
all-unigene000003	0.388638	0.992605	-0.236248	0.993293	0.811096	0.946112	-0.95051	0.871606
all-unigene000004	-0.785534	0.857092	-0.457292	0.911565	#N/A	#N/A	#N/A	#N/A
all-unigene000005	-8.21175	0.615021	-7.67229	0.778479	6.68271	0.857739	#N/A	#N/A
all-unigene000006	-1.54024	0.570683	0.442543	0.929584	-13.1271	4.83e-11	1.8003	0.205744
all-unigene000007	-1.73231	0.507007	0.608682	0.899632	#N/A	#N/A	#N/A	#N/A
all-unigene000008	0.405935	0.88439	-2.3529	0.734334	1.36917	0.793903	#N/A	#N/A
all-unigene000009	0.52908	0.904542	-0.608678	0.902119	0.219284	0.93264	1.11949	0.796978
all-unigene000010	0.0437902	0.884607	-0.527674	0.909167	-6.63371	0.861595	#N/A	#N/A
all-unigene000011	#N/A	#N/A	7.32751	0.823505	-6.63371	0.861595	#N/A	#N/A
all-unigene000012	-1.17588	0.814652	-1.61782	0.865467	#N/A	#N/A	#N/A	#N/A
all-unigene000013	-1.25149	0.724718	-0.993425	0.844497	#N/A	#N/A	#N/A	#N/A
all-unigene000014	-6.63649	0.862996	-6.67935	0.889583	#N/A	#N/A	#N/A	#N/A
all-unigene000015	-1.32023	0.788319	-0.241671	0.987548	#N/A	#N/A	#N/A	#N/A
all-unigene000016	#N/A	#N/A	12.3865	1.08e-07	#N/A	#N/A	#N/A	#N/A
all-unigene000017	-9.03339	0.317075	#N/A	#N/A	-1.0755	0.878375	1.42705	0.834333
all-unigene000018	-0.365639	0.9858	-1.07662	0.905022	-0.503096	0.989154	0.07144	0.994729
all-unigene000019	-6.63649	0.866885	#N/A	#N/A	#N/A	#N/A	#N/A	#N/A
all-unigene000020	-7.62922	0.739393	#N/A	#N/A	#N/A	#N/A	#N/A	#N/A
all-unigene000021	-1.13529	0.854049	-0.584441	0.965878	-0.23919	0.99839	0.47258	0.997612
all-unigene000022	-1.2405	0.739792	#N/A	#N/A	#N/A	#N/A	7.34917	0.803807
all-unigene000023	#N/A	#N/A	#N/A	#N/A	#N/A	#N/A	#N/A	#N/A
all-unigene000024	-0.632514	0.867069	7.51793	0.837771	7.77282	0.799398	1.32171	0.874484
all-unigene000025	-0.97066	0.872229	-6.67935	0.894328	1.04196	0.900704	#N/A	#N/A
all-unigene000026	7.67288	0.728981	-0.0424836	0.905307	#N/A	#N/A	#N/A	#N/A
all-unigene000027	#N/A	#N/A	#N/A	#N/A	#N/A	#N/A	#N/A	#N/A
all-unigene000028	-8.21175	0.661444	-6.67935	0.889583	-6.63371	0.895847	6.74032	0.886924
all-unigene000029	#N/A	#N/A	#N/A	#N/A	#N/A	#N/A	#N/A	#N/A
all-unigene000030	0.299995	0.886	-7.9039	0.738627	#N/A	#N/A	-0.417446	0.897727
all-unigene000031	0.390834	0.881835	-0.733235	0.884422	0.0902774	0.911263	#N/A	#N/A
all-unigene000032	-8.21175	0.669056	-1.03894	0.882668	1.70003	0.885899	1.7401	0.854796
all-unigene000033	-7.62922	0.775849	#N/A	#N/A	-6.63371	0.895847	#N/A	#N/A
all-unigene000034	-6.63649	0.838116	6.63708	0.872551	-6.63371	0.861595	#N/A	#N/A
all-unigene000035	#N/A	#N/A	#N/A	#N/A	#N/A	#N/A	#N/A	#N/A
all-unigene000036	-10.4054	0.014356	12.0207	2.08e-06	#N/A	#N/A	#N/A	#N/A
all-unigene000037	-0.063014	0.930602	-2.28917	0.0934771	#N/A	#N/A	-6.57615	0.867478
all-unigene000038	11.5937	5.21e-05	-12.7397	5.83e-09	#N/A	#N/A	12.54	2.39e-08
all-unigene000039	-6.82374	0.826115	7.15871	0.838976	#N/A	#N/A	6.86353	0.846935
all-unigene000040	-11.2629	0.000351857	#N/A	#N/A	-8.79229	0.520151	#N/A	#N/A
all-unigene000041	-10.2117	0.0278531	#N/A	#N/A	-0.879525	0.888408	#N/A	#N/A
all-unigene000042	-8.21175	0.615021	#N/A	#N/A	#N/A	#N/A	#N/A	#N/A
all-unigene000043	-0.736993	0.860384	0.536957	0.899762	-9.86858	0.0749854	-1.70625	0.838135
all-unigene000044	-1.55008	0.547265	-2.35391	0.212112	#N/A	#N/A	#N/A	#N/A
all-unigene000045	-1.95261	0.569955	-6.67935	0.889583	-0.705056	0.88635	-0.0565424	0.919052
all-unigene000046	2.35407	0.682183	1.31213	0.843911	-0.121536	0.907772	0.172174	0.900264
all-unigene000047	#N/A	#N/A	#N/A	#N/A	#N/A	#N/A	#N/A	#N/A
all-unigene000048	-2.24946	0.706908	0.0618981	0.905106	#N/A	#N/A	#N/A	#N/A
all-unigene000049	-0.538872	0.874058	#N/A	#N/A	#N/A	#N/A	-8.88593	0.498055
all-unigene000050	-0.990729	0.816842	0.729957	0.886908	0.649612	0.891155	-1.41936	0.738511
all-unigene000051	-3.64355	0.11406	-0.703778	0.892686	0.463183	0.901667	-0.248513	0.902171
all-unigene000052	-6.63649	0.838116	#N/A	#N/A	-0.892584	0.892033	#N/A	#N/A
all-unigene000053	-2.26684	0.702331	-8.56432	0.553035	#N/A	#N/A	1.0896	0.862739
all-unigene000054	-8.21175	0.615021	7.62981	0.787488	#N/A	#N/A	#N/A	#N/A
all-unigene000055	0.815281	0.852279	1.0077	0.840812	0.402589	0.926048	-0.978599	0.845987
all-unigene000056	-8.94677	0.352475	#N/A	#N/A	#N/A	#N/A	#N/A	#N/A
all-unigene000057	-9.7128	0.109882	#N/A	#N/A	#N/A	#N/A	#N/A	#N/A
all-unigene000058	-0.370623	0.883396	-0.327355	0.909463	0.795215	0.881599	0.457896	0.90255
all-unigene000059	-0.121296	0.887314	3.19326	0.0545959	0.684819	0.888329	0.575941	0.908579
all-unigene000060	-1.06475	0.790307	0.212561	0.934269	-9.59734	0.153213	0.732828	0.882014
all-unigene000061	-6.63649	0.838116	#N/A	#N/A	#N/A	#N/A	#N/A	#N/A
all-unigene000062	0.0437321	0.880973	-0.0134816	0.909959	0.0492426	0.912007	-0.248513	0.90475
all-unigene000063	-6.63649	0.862996	#N/A	#N/A	#N/A	#N/A	#N/A	#N/A
all-unigene000064	-7.62922	0.739393	#N/A	#N/A	6.68271	0.857739	7.73355	0.749395
all-unigene000065	-7.62922	0.739393	-7.67945	0.777396	-6.63371	0.861595	6.74032	0.854821
all-unigene000066	-11.8702	1.03e-05	-6.67935	0.86949	#N/A	#N/A	7.73355	0.749395
all-unigene000067	-2.26684	0.702331	1.53299	0.862522	#N/A	#N/A	-7.56857	0.786059
all-unigene000068	-1.97106	0.22219	-1.04983	0.825777	11.3388	5.48e-05	2.19156	0.242251
all-unigene000069	-1.65525	0.650348	0.698212	0.893989	-0.830625	0.881173	1.05525	0.854085
all-unigene000070	-7.62922	0.775849	#N/A	#N/A	6.68271	0.892847	-6.57615	0.897045
all-unigene000071	7.3072	0.780402	#N/A	#N/A	#N/A	#N/A	7.01298	0.835929
all-unigene000072	-2.58175	0.245204	-9.05473	0.342795	#N/A	#N/A	6.74032	0.854821
all-unigene000073	-6.63649	0.838116	#N/A	#N/A	#N/A	#N/A	#N/A	#N/A
all-unigene000074	-7.62922	0.739393	1.27507	0.855927	6.68271	0.857739	-1.41068	0.864003
all-unigene000075	4.38097	3.42e-08	0.348852	0.931994	3.95049	0.00143417	0.148873	0.906753
all-unigene000076	-4.40208	0.00774139	-6.67935	0.86949	6.68271	0.857739	8.31626	0.609534
all-unigene000077	0.0437684	0.881434	-2.61546	0.646855	-0.943718	0.890482	-8.151	0.678321
all-unigene000078	#N/A	#N/A	#N/A	#N/A	#N/A	#N/A	#N/A	#N/A
all-unigene000079	-8.04961	0.707655	7.97309	0.774024	-6.82096	0.887219	-7.27517	0.858877
all-unigene000080	-6.63649	0.838116	#N/A	#N/A	-6.63371	0.861595	#N/A	#N/A
all-unigene000081	-9.13292	0.327934	#N/A	#N/A	#N/A	#N/A	#N/A	#N/A
all-unigene000082	0.93295	0.832549	-0.0639031	0.920655	-7.09438	0.871392	-1.57565	0.85376
all-unigene000083	-0.356853	0.879586	-8.92217	0.46407	7.37332	0.84743	-8.02593	0.764904
all-unigene000084	-8.21175	0.615021	#N/A	#N/A	#N/A	#N/A	#N/A	#N/A
all-unigene000085	-9.00047	0.385805	#N/A	#N/A	#N/A	#N/A	#N/A	#N/A
all-unigene000086	-1.60869	0.614683	0.935552	0.858158	1.31019	0.814105	-9.73257	0.0996423
all-unigene000087	-0.41678	0.880834	0.62478	0.894121	-1.04451	0.80894	-1.35774	0.68308
all-unigene000088	-9.45787	0.159308	9.53135	0.155273	#N/A	#N/A	#N/A	#N/A
all-unigene000089	-0.704853	0.858259	-0.595855	0.904629	-7.40167	0.847046	8.03094	0.747459
all-unigene000090	1.78866	0.30262	-2.83347	0.0666374	5.93123	0.887973	#N/A	#N/A
all-unigene000091	-7.62922	0.739393	#N/A	#N/A	#N/A	#N/A	#N/A	#N/A
all-unigene000092	-9.20932	0.247054	-1.03522	0.890661	#N/A	#N/A	#N/A	#N/A
all-unigene000093	-10.6983	0.00450861	#N/A	#N/A	#N/A	#N/A	#N/A	#N/A
all-unigene000094	-8.21175	0.615021	-1.03522	0.890661	-6.63371	0.861595	-6.57615	0.867478
all-unigene000095	-0.108011	0.897629	-0.948705	0.859425	-6.63371	0.861595	6.74032	0.854821
all-unigene000096	-0.954404	0.837078	1.53994	0.742173	-0.447788	0.925422	-0.971252	0.846366
all-unigene000097	-2.27243	0.520835	-2.61546	0.646855	#N/A	#N/A	#N/A	#N/A
all-unigene000098	-0.76202	0.855285	1.27507	0.859797	-6.63371	0.895847	0.164981	0.907648
all-unigene000099	-0.556265	0.893059	0.693667	0.89441	-2.0836	0.438429	-10.0218	0.0446021
all-unigene000100	-7.62922	0.739393	#N/A	#N/A	#N/A	#N/A	#N/A	#N/A
all-unigene000101	0.0437902	0.884607	-2.03168	0.80461	#N/A	#N/A	#N/A	#N/A
all-unigene000102	-2.83131	0.014811	-1.91265	0.195937	6.68271	0.892697	-6.57615	0.897576
all-unigene000103	#N/A	#N/A	-9.15317	0.353126	-9.36546	0.248088	#N/A	#N/A
all-unigene000104	-1.82719	0.631241	1.53761	0.818931	#N/A	#N/A	6.74032	0.854821
all-unigene000105	-0.954404	0.837078	0.278608	0.90749	-0.848697	0.876302	-0.331529	0.929001
all-unigene000106	-10.0827	0.032802	#N/A	#N/A	#N/A	#N/A	-10.2846	0.0187374
all-unigene000107	-1.53286	0.617776	11.6071	3.17e-05	#N/A	#N/A	9.3589	0.238765
all-unigene000108	0.179667	0.887405	#N/A	#N/A	7.72507	0.806662	#N/A	#N/A
all-unigene000109	-2.52298	0.187053	-1.21863	0.819587	-0.420279	0.904889	#N/A	#N/A
all-unigene000110	-10.2081	0.022019	0.371803	0.909625	9.67037	0.0883881	7.73355	0.749395
all-unigene000111	0.635416	0.865287	#N/A	#N/A	0.0493654	0.91078	-9.37049	0.273514
all-unigene000112	-8.77253	0.482181	-0.483434	0.904864	7.895	0.779491	#N/A	#N/A
all-unigene000113	-9.53651	0.13561	8.52946	0.573477	-8.62995	0.504764	8.74448	0.449203
all-unigene000114	-8.74298	0.494032	#N/A	#N/A	#N/A	#N/A	#N/A	#N/A
all-unigene000115	#N/A	#N/A	#N/A	#N/A	#N/A	#N/A	#N/A	#N/A
all-unigene000116	#N/A	#N/A	#N/A	#N/A	#N/A	#N/A	#N/A	#N/A
all-unigene000117	8.25549	0.596488	-0.0424836	0.905307	6.68271	0.857739	6.74032	0.854821
all-unigene000118	-0.710319	0.864989	#N/A	#N/A	-0.533284	0.89885	8.66012	0.484368
all-unigene000119	-7.94969	0.679703	#N/A	#N/A	#N/A	#N/A	#N/A	#N/A
all-unigene000120	-6.63649	0.862996	#N/A	#N/A	#N/A	#N/A	#N/A	#N/A
all-unigene000121	-2.94381	0.435422	-8.2549	0.655138	#N/A	#N/A	#N/A	#N/A
all-unigene000122	-1.64688	0.645722	0.487366	0.910351	#N/A	#N/A	#N/A	#N/A
all-unigene000123	-7.62922	0.775849	#N/A	#N/A	-6.63371	0.895847	#N/A	#N/A
all-unigene000124	#N/A	#N/A	-9.98855	0.042646	#N/A	#N/A	#N/A	#N/A
all-unigene000125	-2.20127	0.332798	-0.11343	0.910666	-8.62278	0.507612	-8.151	0.678321
all-unigene000126	-1.75764	0.590889	0.159846	0.91266	8.5285	0.615601	-8.42116	0.669399
all-unigene000127	-0.60785	0.88725	1.65714	0.404559	#N/A	#N/A	#N/A	#N/A
all-unigene000128	-0.540641	0.884652	-0.501859	0.919864	#N/A	#N/A	#N/A	#N/A
all-unigene000129	-0.807129	0.84617	1.54624	0.856537	-0.956289	0.897709	-7.31848	0.854661
all-unigene000130	-11.5104	7.81e-05	0.2152	0.938207	#N/A	#N/A	#N/A	#N/A
all-unigene000131	-11.7098	3.42e-05	-8.90395	0.472502	#N/A	#N/A	#N/A	#N/A
all-unigene000132	-1.94564	0.771721	-0.0422733	0.906099	#N/A	#N/A	#N/A	#N/A
all-unigene000133	-0.234551	0.952708	0.0715866	0.940099	11.3222	8.76e-05	-0.163151	0.913577
all-unigene000134	-2.12059	0.600415	2.26801	0.765419	8.67214	0.560611	7.73355	0.799924
all-unigene000135	-10.2876	0.0168746	#N/A	#N/A	#N/A	#N/A	#N/A	#N/A
all-unigene000136	-0.194236	0.942948	11.4023	8.27e-05	#N/A	#N/A	1.17059	0.772395
all-unigene000137	-1.53182	0.825214	-1.03522	0.890661	#N/A	#N/A	#N/A	#N/A
all-unigene000138	-9.20932	0.247054	0.634365	0.896078	7.67567	0.758821	9.72846	0.0786102
all-unigene000139	-0.0591945	0.931842	2.07308	0.0493259	0.0489988	0.90286	-7.56857	0.786059
all-unigene000140	-10.6147	0.00505931	#N/A	#N/A	-1.55278	0.450319	-10.5547	0.00673962
all-unigene000141	-8.62557	0.479719	1.53299	0.862522	-6.63371	0.861595	6.74032	0.854821
all-unigene000142	-0.905149	0.852772	2.01924	0.734862	#N/A	#N/A	-8.73746	0.486522
all-unigene000143	#N/A	#N/A	#N/A	#N/A	0.958718	0.902364	-1.41068	0.876911
all-unigene000144	-8.62557	0.479719	6.63708	0.872551	#N/A	#N/A	-6.57615	0.867478
all-unigene000145	-6.63649	0.862996	#N/A	#N/A	#N/A	#N/A	#N/A	#N/A
all-unigene000146	-1.27389	0.818576	1.94681	0.815917	7.67567	0.758821	-6.57615	0.867478
all-unigene000147	-10.5298	0.00703282	#N/A	#N/A	8.25828	0.626744	-0.417446	0.897727
all-unigene000148	0.228205	0.922536	-0.652469	0.910088	-0.369429	0.970065	-0.145106	0.970299
all-unigene000149	#N/A	#N/A	#N/A	#N/A	1.10187	0.893883	0.426885	0.904383
all-unigene000150	0.546204	0.872116	-4.11558	0.025151	-0.597255	0.895598	0.956471	0.854394
all-unigene000151	-1.16065	0.785119	-1.03861	0.852375	9.60403	0.10505	-1.40447	0.825405
all-unigene000152	7.67288	0.766493	#N/A	#N/A	#N/A	#N/A	7.73355	0.799924
all-unigene000153	-3.17159	0.332993	7.20761	0.859461	-6.63371	0.895847	#N/A	#N/A
all-unigene000154	-0.302592	0.918685	-1.16749	0.792145	-0.061346	0.990928	-0.191989	0.987299
all-unigene000155	0.779824	0.855115	-8.66875	0.512306	#N/A	#N/A	#N/A	#N/A
all-unigene000156	-10.3906	0.0117638	1.06577	0.876893	#N/A	#N/A	#N/A	#N/A
all-unigene000157	#N/A	#N/A	#N/A	#N/A	#N/A	#N/A	#N/A	#N/A
all-unigene000158	2.69404	0.0261049	#N/A	#N/A	1.04154	0.839934	1.24897	0.790008
all-unigene000159	-8.62557	0.479719	1.53299	0.862522	-1.2683	0.854579	0.164164	0.900501
all-unigene000160	-1.39544	0.699377	-2.36168	0.235889	-6.63371	0.861595	6.74032	0.854821
all-unigene000161	-9.57241	0.12554	-1.9498	0.604165	-10.1798	0.0192283	8.68632	0.473601
all-unigene000162	-6.63649	0.838116	-6.67935	0.86949	-6.63371	0.861595	#N/A	#N/A
all-unigene000163	-0.952692	0.849529	-1.03522	0.890661	-0.947102	0.881861	-1.41068	0.864003
all-unigene000164	-1.76865	0.692789	0.990677	0.862364	3.04423	0.00500776	0.973198	0.846295
all-unigene000165	-1.53644	0.777093	-2.49612	0.438407	0.271462	0.912763	-0.932803	0.859537
all-unigene000166	-7.62922	0.775849	-6.67935	0.889583	0.0489988	0.916893	-7.56857	0.830653
all-unigene000167	-1.50032	0.632908	-0.829039	0.880142	-1.67396	0.473442	0.562216	0.906885
all-unigene000168	#N/A	#N/A	#N/A	#N/A	#N/A	#N/A	#N/A	#N/A
all-unigene000169	-1.88005	0.482863	1.30446	0.729853	-0.360892	0.904171	-0.69076	0.888688
all-unigene000170	-11.7778	1.77e-05	#N/A	#N/A	0.00552837	0.94017	#N/A	#N/A
all-unigene000171	-10.7798	0.00334343	-9.82384	0.088702	-7.85188	0.790569	#N/A	#N/A
all-unigene000172	-0.438082	0.884099	#N/A	#N/A	#N/A	#N/A	#N/A	#N/A
all-unigene000173	-1.94564	0.771721	#N/A	#N/A	#N/A	#N/A	#N/A	#N/A
all-unigene000174	-1.572	0.633341	9.79406	0.102751	9.67037	0.119903	#N/A	#N/A
all-unigene000175	-2.26684	0.716784	0.540049	0.903325	#N/A	#N/A	#N/A	#N/A
all-unigene000176	-11.5293	7.06e-05	8.79248	0.469666	#N/A	#N/A	#N/A	#N/A
all-unigene000177	-10.291	0.0166793	10.1105	0.0311206	-10.7108	0.00206825	0.0173993	0.922549
all-unigene000178	#N/A	#N/A	-7.67229	0.809849	-6.63371	0.895847	0.164164	0.913436
all-unigene000179	-0.273672	0.882632	-1.69394	0.850693	-6.9062	0.882936	0.146884	0.906852
all-unigene000180	-0.475298	0.914955	-0.0817533	0.955813	10.1175	0.0216746	-0.0400641	0.918833
all-unigene000181	0.0488198	0.941328	-1.51187	0.512419	0.748418	0.895611	-7.86581	0.792378
all-unigene000182	-10.6372	0.005764	0.0166597	0.914435	7.75255	0.802677	#N/A	#N/A
all-unigene000183	-0.60163	0.868805	-0.332072	0.906275	-1.64193	0.696628	11.0407	0.000565492
all-unigene000184	-6.82374	0.856709	#N/A	#N/A	-6.63371	0.895701	#N/A	#N/A
all-unigene000185	-1.41165	0.742585	-0.195656	0.908305	#N/A	#N/A	-7.95085	0.777422
all-unigene000186	#N/A	#N/A	#N/A	#N/A	#N/A	#N/A	6.74032	0.854821
all-unigene000187	-0.971676	0.83863	8.08202	0.743459	0.200318	0.912339	-1.91407	0.768979
all-unigene000188	-10.2623	0.023567	-8.97259	0.440399	-1.16743	0.773648	-1.79006	0.671803
all-unigene000189	-9.79347	0.0742323	10.3241	0.014546	-0.845709	0.882369	-1.0828	0.823989
all-unigene000190	-0.161407	0.898761	-0.632516	0.895771	0.0494182	0.91719	-0.161026	0.910016
all-unigene000191	-8.99491	0.379951	#N/A	#N/A	7.05798	0.872534	#N/A	#N/A
all-unigene000192	-1.85873	0.440245	-0.201824	0.928788	-9.79067	0.0935345	-0.00411374	0.912172
all-unigene000193	-7.63638	0.780666	#N/A	#N/A	#N/A	#N/A	-7.8001	0.802232
all-unigene000194	#N/A	#N/A	#N/A	#N/A	8.96133	0.430982	#N/A	#N/A
all-unigene000195	-1.74967	0.728549	0.0965902	0.910425	-8.35037	0.680566	-1.95158	0.743671
all-unigene000196	0.168563	0.900129	-0.207782	0.923179	-1.03988	0.835772	-0.919407	0.856656
all-unigene000197	0.97181	0.923455	0.272231	0.986297	-0.294536	0.987453	0.236528	0.98576
all-unigene000198	-8.21175	0.669056	#N/A	#N/A	#N/A	#N/A	#N/A	#N/A
all-unigene000199	-9.43136	0.167786	-6.67935	0.86949	-8.20896	0.647875	8.31626	0.609534
all-unigene000200	-0.711425	0.897144	-1.74311	0.383063	-1.18974	0.806784	-2.17197	0.295032
all-unigene000201	9.15633	0.258429	9.16108	0.304666	-0.958258	0.862112	0.257305	0.907015
all-unigene000202	-1.15732	0.768455	0.91229	0.863557	-0.0346122	0.914334	#N/A	#N/A
all-unigene000203	-11.3698	0.000163238	-1.033	0.858187	#N/A	#N/A	#N/A	#N/A
all-unigene000204	#N/A	#N/A	#N/A	#N/A	#N/A	#N/A	#N/A	#N/A
all-unigene000205	-11.807	1.49e-05	#N/A	#N/A	#N/A	#N/A	12.2189	2.07e-07
all-unigene000206	-2.01047	0.577922	-9.68843	0.101054	-7.95835	0.70985	#N/A	#N/A
all-unigene000207	-11.0149	0.000917123	#N/A	#N/A	#N/A	#N/A	10.3129	0.0114126
all-unigene000208	-2.75143	0.548976	-0.0422733	0.916552	1.04196	0.900704	-1.41068	0.877198
all-unigene000209	-1.54005	0.59469	-0.720193	0.892262	-8.62278	0.507612	0.164981	0.900315
all-unigene000210	-0.481138	0.966564	-0.393	0.968365	0.0738049	0.989894	0.642497	0.976851
all-unigene000211	-10.4303	0.0101915	#N/A	#N/A	#N/A	#N/A	-0.994764	0.846946
all-unigene000212	-1.04541	0.79276	-5.16497	0.00136744	1.11857	0.759904	1.33503	0.757934
all-unigene000213	-0.364743	0.878218	-0.977878	0.858974	-0.223156	0.918015	0.407603	0.905005
all-unigene000214	#N/A	#N/A	#N/A	#N/A	#N/A	#N/A	#N/A	#N/A
all-unigene000215	0.454601	0.879415	1.7954	0.685486	#N/A	#N/A	6.74032	0.854821
all-unigene000216	-10.1704	0.0248928	9.79406	0.0814757	-0.292545	0.910341	9.27259	0.220371
all-unigene000217	-0.586817	0.957823	-0.997515	0.857858	12.2628	6.76e-08	12.0737	6.09e-07
all-unigene000218	#N/A	#N/A	#N/A	#N/A	#N/A	#N/A	#N/A	#N/A
all-unigene000219	11.4757	7.61e-05	-2.33325	0.388383	-0.22225	0.947442	0.558828	0.901493
all-unigene000220	-10.4054	0.01384	#N/A	#N/A	-7.62643	0.822722	#N/A	#N/A
all-unigene000221	-9.01976	0.369199	#N/A	#N/A	#N/A	#N/A	7.75493	0.796739
all-unigene000222	-9.84691	0.0813006	-9.16597	0.346898	#N/A	#N/A	#N/A	#N/A
all-unigene000223	#N/A	#N/A	#N/A	#N/A	#N/A	#N/A	#N/A	#N/A
all-unigene000224	7.66569	0.767583	0.993969	0.899967	-1.94724	0.828109	1.79313	0.851251
all-unigene000225	-0.981031	0.84467	-0.413967	0.910037	-7.92955	0.715979	-9.82858	0.0776807
all-unigene000226	-8.94677	0.352475	-6.67935	0.86949	#N/A	#N/A	#N/A	#N/A
all-unigene000227	-8.1973	0.67276	#N/A	#N/A	2.01244	0.868544	-6.64582	0.894853
all-unigene000228	-10.5298	0.00703282	0.140451	0.927411	#N/A	#N/A	8.31626	0.609534
all-unigene000229	-10.5298	0.00703282	#N/A	#N/A	#N/A	#N/A	8.31626	0.609534
all-unigene000230	1.03639	0.870181	6.63708	0.89686	-0.303963	0.914983	#N/A	#N/A
all-unigene000231	-0.949288	0.861743	0.950461	0.893147	#N/A	#N/A	#N/A	#N/A
all-unigene000232	-2.78212	0.158623	0.181355	0.916029	0.631851	0.902862	-0.828256	0.902713
all-unigene000233	6.92865	0.848835	7.81164	0.80068	8.25828	0.699796	#N/A	#N/A
all-unigene000234	-1.46122	0.610333	-2.57814	0.00349481	6.68271	0.857739	6.74032	0.854821
all-unigene000235	#N/A	#N/A	#N/A	#N/A	#N/A	#N/A	#N/A	#N/A
all-unigene000236	-10.4709	0.0113097	-9.90091	0.0711443	-1.82399	0.844743	8.31626	0.678103
all-unigene000237	-1.23506	0.760407	-0.0405786	0.916081	#N/A	#N/A	#N/A	#N/A
all-unigene000238	-2.58634	0.322603	-8.75601	0.53791	#N/A	#N/A	#N/A	#N/A
all-unigene000239	#N/A	#N/A	#N/A	#N/A	#N/A	#N/A	1.14912	0.892767
all-unigene000240	0.148177	0.942171	-0.266898	0.949064	0.210435	0.963451	-0.64063	0.927039
all-unigene000241	-1.68595	0.640974	0.950461	0.893147	#N/A	#N/A	#N/A	#N/A
all-unigene000242	-2.69616	0.0134778	0.821983	0.879197	#N/A	#N/A	#N/A	#N/A
all-unigene000243	-0.539976	0.871231	1.50862	0.660387	-0.627583	0.896986	0.705837	0.891358
all-unigene000244	-3.11977	0.0971007	-0.777629	0.889916	#N/A	#N/A	#N/A	#N/A
all-unigene000245	-1.75848	0.730187	-0.0424836	0.909891	#N/A	#N/A	-6.57615	0.897045
all-unigene000246	-1.33622	0.681535	1.0245	0.83364	-2.1032	0.326274	0.54748	0.912816
all-unigene000247	-10.0827	0.032802	#N/A	#N/A	#N/A	#N/A	#N/A	#N/A
all-unigene000248	-11.9685	5.75e-06	0.890455	0.86745	-11.1326	0.000231939	0.591567	0.89346
all-unigene000249	0.208826	0.901411	-1.28024	0.861766	-0.793687	0.906501	-1.9999	0.121267
all-unigene000250	#N/A	#N/A	#N/A	#N/A	#N/A	#N/A	#N/A	#N/A
all-unigene000251	1.69189	0.745481	-2.67886	0.620833	#N/A	#N/A	#N/A	#N/A
all-unigene000252	-0.277532	0.8823	0.272838	0.907583	1.04571	0.875814	6.74032	0.854821
all-unigene000253	#N/A	#N/A	#N/A	#N/A	#N/A	#N/A	#N/A	#N/A
all-unigene000254	-9.79347	0.0932155	0.75813	0.894131	-0.542842	0.90276	-0.828256	0.902713
all-unigene000255	-0.862214	0.844919	0.541155	0.900083	-1.15137	0.791809	0.712836	0.892496
all-unigene000256	-11.082	0.000671912	-0.45641	0.901865	-8.20896	0.647875	0.428056	0.901805
all-unigene000257	-0.949288	0.871294	-0.0422733	0.914347	8.25828	0.700131	1.7401	0.854462
all-unigene000258	#N/A	#N/A	#N/A	#N/A	#N/A	#N/A	#N/A	#N/A
all-unigene000259	6.67993	0.859727	#N/A	#N/A	#N/A	#N/A	#N/A	#N/A
all-unigene000260	#N/A	#N/A	#N/A	#N/A	#N/A	#N/A	#N/A	#N/A
all-unigene000261	-2.49849	0.0825672	-7.67229	0.778479	#N/A	#N/A	#N/A	#N/A
all-unigene000262	-0.354531	0.919372	-0.443079	0.934658	1.23144	0.766078	-0.115923	0.92882
all-unigene000263	0.0318958	0.895364	-0.0641762	0.913669	-0.955596	0.853897	-1.16557	0.809686
all-unigene000264	-8.21175	0.661444	6.63708	0.892218	#N/A	#N/A	#N/A	#N/A
all-unigene000265	-2.02149	0.378093	-1.03894	0.881412	#N/A	#N/A	#N/A	#N/A
all-unigene000266	-10.1936	0.029535	#N/A	#N/A	10.6541	0.00329678	9.98821	0.049066
all-unigene000267	-2.43252	0.0827656	-11.3489	9.23e-05	-0.337307	0.925165	-9.37049	0.216925
all-unigene000268	8.25549	0.596488	-0.45641	0.901865	-1.94006	0.811108	1.48284	0.826158
all-unigene000269	-10.7102	0.00344455	0.955927	0.865798	-7.62643	0.770055	9.05141	0.314145
all-unigene000270	-6.63649	0.838116	-6.67935	0.86949	-6.63371	0.861595	#N/A	#N/A
all-unigene000271	#N/A	#N/A	#N/A	#N/A	#N/A	#N/A	#N/A	#N/A
all-unigene000272	-0.773821	0.911717	-0.165535	0.97043	-0.513679	0.934343	0.426866	0.951206
all-unigene000273	-9.20932	0.247054	#N/A	#N/A	-1.52625	0.859236	#N/A	#N/A
all-unigene000274	-8.62557	0.530547	-6.67935	0.889583	6.68271	0.892847	#N/A	#N/A
all-unigene000275	-0.914905	0.846468	-8.41789	0.650399	0.290881	0.91119	-1.82445	0.838288
all-unigene000276	-2.74588	0.183125	#N/A	#N/A	8.11741	0.666396	0.136781	0.914529
all-unigene000277	#N/A	#N/A	#N/A	#N/A	#N/A	#N/A	#N/A	#N/A
all-unigene000278	-10.0761	0.0411665	0.219117	0.908149	#N/A	#N/A	#N/A	#N/A
all-unigene000279	-1.32677	0.80182	-7.49696	0.837958	#N/A	#N/A	#N/A	#N/A
all-unigene000280	-7.62922	0.781665	-6.67935	0.894328	-6.63371	0.895701	#N/A	#N/A
all-unigene000281	-7.62922	0.739393	-7.67229	0.778479	#N/A	#N/A	#N/A	#N/A
all-unigene000282	-2.2696	0.144183	0.384864	0.918262	-0.349923	0.92103	-10.6493	0.00456686
all-unigene000283	-1.50951	0.742714	#N/A	#N/A	0.281318	0.916074	-0.477019	0.902682
all-unigene000284	-7.62922	0.739393	-6.67935	0.86949	#N/A	#N/A	#N/A	#N/A
all-unigene000285	#N/A	#N/A	7.29167	0.858802	#N/A	#N/A	#N/A	#N/A
all-unigene000286	0.204475	0.901934	1.07216	0.811268	-0.53516	0.905548	-0.206056	0.925044
all-unigene000287	0.732618	0.858476	-0.0423181	0.915515	-0.921803	0.875422	2.70442	0.649543
all-unigene000288	-7.47004	0.762564	#N/A	#N/A	-7.51455	0.785875	#N/A	#N/A
all-unigene000289	0.158518	0.893435	-1.2716	0.792768	-0.767563	0.876017	-1.09644	0.823543
all-unigene000290	-10.6496	0.00440366	#N/A	#N/A	10.2821	0.0116327	#N/A	#N/A
all-unigene000291	-6.63649	0.838116	#N/A	#N/A	#N/A	#N/A	#N/A	#N/A
all-unigene000292	-7.62922	0.781665	#N/A	#N/A	0.863535	0.88992	#N/A	#N/A
all-unigene000293	-2.53312	0.311377	7.87961	0.790082	-7.62643	0.822492	-7.85996	0.793287
all-unigene000294	-1.95282	0.782905	-0.0422733	0.914347	-0.533284	0.905405	0.135293	0.913611
all-unigene000295	-0.949288	0.873048	-0.111992	0.916236	-1.85582	0.723067	-9.04653	0.426458
all-unigene000296	#N/A	#N/A	-0.270932	0.912577	#N/A	#N/A	#N/A	#N/A
all-unigene000297	-0.837634	0.911063	-1.51375	0.478277	-8.20896	0.647875	#N/A	#N/A
all-unigene000298	#N/A	#N/A	-1.03522	0.890661	-6.63371	0.861595	#N/A	#N/A
all-unigene000299	-0.847907	0.847218	0.989405	0.884076	0.463183	0.904652	-0.67487	0.89508
all-unigene000300	6.67993	0.859727	-6.67935	0.889583	#N/A	#N/A	#N/A	#N/A
all-unigene000301	-0.951555	0.854711	-1.03894	0.877613	-3.10795	0.366012	-2.98423	0.439811
all-unigene000302	-0.655913	0.870547	0.246563	0.919277	6.68271	0.857739	-6.57615	0.867478
all-unigene000303	-8.76927	0.483495	9.59523	0.166815	#N/A	#N/A	#N/A	#N/A
all-unigene000304	-3.11353	0.34763	-8.66875	0.512306	-0.142965	0.917453	-1.99902	0.680398
all-unigene000305	-4.89665	0.000750633	-0.812529	0.8826	#N/A	#N/A	#N/A	#N/A
all-unigene000306	-1.62224	0.562506	-0.701244	0.89557	#N/A	#N/A	#N/A	#N/A
all-unigene000307	-2.89337	0.160232	-0.237157	0.930881	-7.62643	0.770055	-6.56181	0.868154
all-unigene000308	0.0434434	0.877692	#N/A	#N/A	#N/A	#N/A	#N/A	#N/A
all-unigene000309	#N/A	#N/A	#N/A	#N/A	-6.89433	0.883417	#N/A	#N/A
all-unigene000310	-2.26684	0.702331	-8.2549	0.655138	-6.63371	0.861595	7.73355	0.749395
all-unigene000311	-1.75848	0.730187	0.644899	0.898201	#N/A	#N/A	-2.14562	0.785834
all-unigene000312	-8.94677	0.400684	2.26801	0.765419	7.67567	0.813501	-6.57615	0.897045
all-unigene000313	-10.2081	0.022019	#N/A	#N/A	#N/A	#N/A	#N/A	#N/A
all-unigene000314	-0.601922	0.875109	-0.740747	0.888733	#N/A	#N/A	#N/A	#N/A
all-unigene000315	-2.55552	0.0294676	11.4879	4.98e-05	10.9188	0.000615457	0.653743	0.925005
all-unigene000316	-9.79347	0.0902089	#N/A	#N/A	8.63939	0.573762	8.5173	0.612165
all-unigene000317	-7.62922	0.739393	#N/A	#N/A	#N/A	#N/A	#N/A	#N/A
all-unigene000318	-0.902089	0.833147	-0.625067	0.894322	#N/A	#N/A	#N/A	#N/A
all-unigene000319	-9.82201	0.068929	#N/A	#N/A	#N/A	#N/A	#N/A	#N/A
all-unigene000320	-1.48013	0.672077	-2.12698	0.579683	0.470087	0.913704	-0.238472	0.91935
all-unigene000321	-8.21175	0.615021	1.94681	0.815917	#N/A	#N/A	-7.56857	0.786059
all-unigene000322	-1.40411	0.825777	-1.36016	0.851179	0.390571	0.907341	1.31285	0.745664
all-unigene000323	7.29792	0.813384	-1.03522	0.898436	-0.769012	0.90626	0.429104	0.901023
all-unigene000324	-3.27898	0.0750573	9.99965	0.044601	2.42977	0.151304	-1.57087	0.644217
all-unigene000325	-10.3235	0.0149103	-1.31614	0.759917	#N/A	#N/A	7.73355	0.749395
all-unigene000326	#N/A	#N/A	-9.40933	0.190875	-11.3201	7.76e-05	10.05	0.0295353
all-unigene000327	-8.89995	0.371614	-1.60629	0.828012	-7.95835	0.70985	0.36971	0.901495
all-unigene000328	-2.49814	0.0660827	-0.723894	0.903341	9.99195	0.033548	9.53606	0.127823
all-unigene000329	2.13943	0.653767	1.26384	0.852197	0.784404	0.890485	1.75576	0.735472
all-unigene000330	-0.904247	0.838005	-8.98997	0.372329	#N/A	#N/A	#N/A	#N/A
all-unigene000331	-1.10689	0.851689	-0.678757	0.907775	-6.63371	0.895847	-7.56857	0.830653
all-unigene000332	-10.0495	0.0461686	-8.66875	0.573501	#N/A	#N/A	#N/A	#N/A
all-unigene000333	0.708077	0.875227	0.279466	0.938485	-0.0234712	0.951048	-2.76226	0.00524285
all-unigene000334	-1.0669	0.829463	0.396524	0.913074	#N/A	#N/A	#N/A	#N/A
all-unigene000335	#N/A	#N/A	#N/A	#N/A	#N/A	#N/A	#N/A	#N/A
all-unigene000336	-0.538872	0.874058	6.63708	0.892218	#N/A	#N/A	#N/A	#N/A
all-unigene000337	#N/A	#N/A	#N/A	#N/A	-6.71696	0.892283	#N/A	#N/A
all-unigene000338	-1.53975	0.627675	-0.843994	0.879011	-1.75289	0.766581	0.165255	0.902173
all-unigene000339	-8.21175	0.615021	#N/A	#N/A	#N/A	#N/A	#N/A	#N/A
all-unigene000340	-6.63649	0.838116	-6.67935	0.86949	#N/A	#N/A	#N/A	#N/A
all-unigene000341	-8.94677	0.352475	1.27715	0.818483	#N/A	#N/A	#N/A	#N/A
all-unigene000342	-0.800437	0.852757	-0.543721	0.904671	9.25592	0.223486	-0.98904	0.869229
all-unigene000343	-1.27389	0.818576	0.541525	0.902522	0.241118	0.908303	0.971291	0.865366
all-unigene000344	-0.218757	0.883987	-0.0422733	0.906099	#N/A	#N/A	#N/A	#N/A
all-unigene000345	-0.627463	0.867811	-0.177778	0.925111	0.316261	0.908602	1.3434	0.766029
all-unigene000346	-0.821673	0.845145	-1.78575	0.802814	#N/A	#N/A	#N/A	#N/A
all-unigene000347	-1.33292	0.744365	-1.26478	0.768318	1.62457	0.867401	1.1574	0.893361
all-unigene000348	-2.52938	0.638946	#N/A	#N/A	7.5324	0.830975	9.14615	0.337704
all-unigene000349	-9.81886	0.0874075	-6.80252	0.888684	#N/A	#N/A	#N/A	#N/A
all-unigene000350	#N/A	#N/A	#N/A	#N/A	#N/A	#N/A	#N/A	#N/A
all-unigene000351	#N/A	#N/A	#N/A	#N/A	#N/A	#N/A	#N/A	#N/A
all-unigene000352	1.46353	0.551886	0.909195	0.869516	0.126712	0.950402	1.08577	0.800768
all-unigene000353	#N/A	#N/A	#N/A	#N/A	#N/A	#N/A	#N/A	#N/A
all-unigene000354	-1.13688	0.76489	-2.54884	0.138134	-6.95273	0.880336	-5.82541	0.917373
all-unigene000355	#N/A	#N/A	0.950461	0.893147	0.0492426	0.904105	-7.56857	0.786059
all-unigene000356	#N/A	#N/A	#N/A	#N/A	#N/A	#N/A	#N/A	#N/A
all-unigene000357	-3.40275	0.205431	-2.83751	0.547107	-6.63371	0.861595	#N/A	#N/A
all-unigene000358	-9.50361	0.178455	4.16418	0.0984553	-1.26945	0.866393	#N/A	#N/A
all-unigene000359	-5.48806	0.00736791	1.29269	0.849842	7.88262	0.781645	#N/A	#N/A
all-unigene000360	-1.68982	0.686667	0.541155	0.89971	#N/A	#N/A	-6.57615	0.897045
all-unigene000361	-0.633185	0.864359	-0.0425542	0.909071	-0.232854	0.945663	0.312542	0.931768
all-unigene000362	#N/A	#N/A	#N/A	#N/A	5.69669	0.920641	#N/A	#N/A
all-unigene000363	#N/A	#N/A	-12.0199	1.56e-06	#N/A	#N/A	1.41411	0.55956
all-unigene000364	0.873214	0.843508	-1.23848	0.842448	6.68271	0.857739	#N/A	#N/A
all-unigene000365	-1.23447	0.784672	-2.77345	0.616314	-9.86098	0.0765599	7.01298	0.872317
all-unigene000366	-1.12557	0.779038	0.672227	0.937512	0.174969	0.951252	-0.604438	0.91113
all-unigene000367	-0.932366	0.821549	-3.31298	0.0238809	#N/A	#N/A	-7.78783	0.80399
all-unigene000368	0.927045	0.825429	0.428467	0.907021	0.0302797	0.910743	0.317474	0.908229
all-unigene000369	-6.5782	0.86969	#N/A	#N/A	5.69669	0.920641	-0.225218	0.912316
all-unigene000370	0.55778	0.876122	-0.0422733	0.906099	#N/A	#N/A	#N/A	#N/A
all-unigene000371	-0.820706	0.849474	-0.166372	0.943783	0.0349573	0.919786	-1.73457	0.70798
all-unigene000372	-10.9446	0.00126129	#N/A	#N/A	#N/A	#N/A	#N/A	#N/A
all-unigene000373	0.266133	0.914964	0.255112	0.944052	0.0493244	0.906675	-1.05423	0.860194
all-unigene000374	-6.63649	0.838116	#N/A	#N/A	0.0492426	0.904105	0.164164	0.900501
all-unigene000375	-6.63649	0.862996	-0.687918	0.9076	#N/A	#N/A	6.88954	0.879124
all-unigene000376	-3.04796	0.247625	-0.321035	0.907077	-0.109153	0.923222	-3.4997	0.0748273
all-unigene000377	#N/A	#N/A	#N/A	#N/A	#N/A	#N/A	#N/A	#N/A
all-unigene000378	-9.84536	0.0648025	9.85058	0.0696261	#N/A	#N/A	9.97004	0.0384107
all-unigene000379	-11.3318	0.000198304	10.3934	0.0111535	0.0494518	0.930036	#N/A	#N/A
all-unigene000380	-2.54374	0.636736	-1.32686	0.839482	1.28735	0.869322	-0.451517	0.899608
all-unigene000381	-10.017	0.050813	0.599419	0.896773	-0.331226	0.910622	#N/A	#N/A
all-unigene000382	-6.63649	0.862996	#N/A	#N/A	#N/A	#N/A	#N/A	#N/A
all-unigene000383	-0.949288	0.861743	-1.26225	0.839578	-8.62278	0.507612	0.747682	0.888692
all-unigene000384	#N/A	#N/A	#N/A	#N/A	#N/A	#N/A	#N/A	#N/A
all-unigene000385	-0.0491998	0.912498	0.857344	0.87516	0.0494182	0.91719	-0.418299	0.90099
all-unigene000386	-3.83465	0.0215852	-0.295806	0.910471	-8.15027	0.73256	-8.57194	0.6227
all-unigene000387	-1.94564	0.784102	-2.03168	0.81569	1.04196	0.900774	1.1574	0.893361
all-unigene000388	2.35407	0.697304	-0.363808	0.905658	1.62457	0.867401	2.47526	0.717448
all-unigene000389	-9.20932	0.287629	#N/A	#N/A	#N/A	#N/A	7.73355	0.799924
all-unigene000390	-9.79347	0.0932155	2.7526	0.602529	-8.20896	0.718527	#N/A	#N/A
all-unigene000391	-7.62922	0.739393	7.74693	0.769919	-6.63371	0.861595	-6.57615	0.867478
all-unigene000392	-2.34931	0.224513	0.800409	0.881762	-0.798872	0.90925	-0.45818	0.965475
all-unigene000393	7.77003	0.711769	#N/A	#N/A	#N/A	#N/A	#N/A	#N/A
all-unigene000394	-1.12413	0.80905	-0.0426108	0.910842	10.5764	0.00472099	#N/A	#N/A
all-unigene000395	#N/A	#N/A	9.84904	0.0843614	-8.28822	0.698336	#N/A	#N/A
all-unigene000396	-6.63649	0.838116	#N/A	#N/A	#N/A	#N/A	#N/A	#N/A
all-unigene000397	7.67288	0.766493	1.41452	0.781212	-0.533284	0.905405	-0.828256	0.90246
all-unigene000398	0.863344	0.848628	1.50474	0.844697	-0.14547	0.912903	-9.56286	0.191404
all-unigene000399	-11.7516	2.05e-05	#N/A	#N/A	#N/A	#N/A	13.8664	1.02e-13
all-unigene000400	-10.4779	0.0110209	-1.03256	0.851945	-8.99767	0.42503	-9.90728	0.0835192
all-unigene000401	#N/A	#N/A	#N/A	#N/A	#N/A	#N/A	#N/A	#N/A
all-unigene000402	-0.59423	0.872931	#N/A	#N/A	7.24375	0.85876	#N/A	#N/A
all-unigene000403	#N/A	#N/A	#N/A	#N/A	#N/A	#N/A	#N/A	#N/A
all-unigene000404	-0.830648	0.844003	8.5256	0.621719	8.59454	0.591192	-8.47956	0.651631
all-unigene000405	-1.25982	0.721123	0.795231	0.893718	-1.62968	0.676144	0.930674	0.856576
all-unigene000406	-10.0536	0.0358461	#N/A	#N/A	#N/A	#N/A	#N/A	#N/A
all-unigene000407	-6.63649	0.862996	#N/A	#N/A	#N/A	#N/A	#N/A	#N/A
all-unigene000408	-1.73231	0.493847	-0.360104	0.920629	-1.52625	0.874051	0.164164	0.913436
all-unigene000409	-2.26684	0.716784	-0.0424836	0.909891	-0.943718	0.903443	-1.82445	0.838288
all-unigene000410	-1.53644	0.777093	2.90842	0.028826	-0.948804	0.870213	0.165599	0.914111
all-unigene000411	-10.153	0.0324492	9.7066	0.122746	#N/A	#N/A	#N/A	#N/A
all-unigene000412	-0.470413	0.891019	-0.27609	0.9076	#N/A	#N/A	#N/A	#N/A
all-unigene000413	-0.370088	0.875155	-0.0424836	0.905307	#N/A	#N/A	7.73355	0.749395
all-unigene000414	-10.5298	0.00703282	7.68611	0.779331	-8.20896	0.647875	6.74032	0.854821
all-unigene000415	-1.80209	0.53284	2.95113	0.158455	-0.943718	0.890482	0.164981	0.900315
all-unigene000416	0.0437321	0.880973	-0.0424836	0.909891	-0.48058	0.904792	-4.34486	0.0088758
all-unigene000417	#N/A	#N/A	#N/A	#N/A	#N/A	#N/A	#N/A	#N/A
all-unigene000418	-7.62922	0.781665	#N/A	#N/A	#N/A	#N/A	#N/A	#N/A
all-unigene000419	-9.62375	0.111981	#N/A	#N/A	#N/A	#N/A	#N/A	#N/A
all-unigene000420	-2.72003	0.139289	-1.10403	0.822629	#N/A	#N/A	#N/A	#N/A
all-unigene000421	-0.894175	0.842123	-0.617314	0.909457	0.0662821	0.948854	-0.256021	0.943578
all-unigene000422	-10.9446	0.00157733	#N/A	#N/A	#N/A	#N/A	8.88362	0.461424
all-unigene000423	0.387134	0.924531	0.59067	0.906815	8.80932	0.419208	-9.08215	0.338614
all-unigene000424	-9.94387	0.0625929	9.21231	0.335205	-0.173198	0.912569	7.14839	0.862945
all-unigene000425	-1.21754	0.782635	0.693667	0.89441	-0.102406	0.922302	-0.511453	0.899345
all-unigene000426	-1.75848	0.725246	0.955584	0.870073	-8.62278	0.507612	0.165393	0.904526
all-unigene000427	-2.8569	0.197311	-8.66875	0.512306	#N/A	#N/A	6.74032	0.854821
all-unigene000428	1.36134	0.808134	-0.934784	0.863711	0.631851	0.896179	-6.57615	0.867478
all-unigene000429	-6.63649	0.866885	#N/A	#N/A	#N/A	#N/A	#N/A	#N/A
all-unigene000430	-10.5583	0.00813809	#N/A	#N/A	#N/A	#N/A	7.66745	0.810178
all-unigene000431	-11.082	0.000671912	-11.4575	4.84e-05	11.0616	0.000282573	11.3712	6.39e-05
all-unigene000432	-0.538872	0.874058	-6.67935	0.889583	0.631851	0.902904	#N/A	#N/A
all-unigene000433	-8.62557	0.530547	#N/A	#N/A	#N/A	#N/A	7.05954	0.86859
all-unigene000434	-8.62557	0.479719	-6.67935	0.86949	#N/A	#N/A	#N/A	#N/A
all-unigene000435	-0.190244	0.909115	1.17102	0.764736	-0.137484	0.925514	-9.99799	0.0644593
all-unigene000436	-9.73797	0.0853906	8.83357	0.451963	-0.86253	0.89288	8.31626	0.609534
all-unigene000437	-0.370088	0.875155	-6.67935	0.86949	-8.20416	0.649218	-1.01549	0.871026
all-unigene000438	-0.17264	0.876101	-0.909967	0.867295	8.22923	0.635375	2.08599	0.7466
all-unigene000439	-10.3235	0.0184651	#N/A	#N/A	#N/A	#N/A	#N/A	#N/A
all-unigene000440	-0.354403	0.929959	-1.52333	0.504361	0.135459	0.972231	0.698157	0.950002
all-unigene000441	0.364988	0.877512	-1.91358	0.637986	7.67567	0.758821	-1.82445	0.822903
all-unigene000442	-8.03343	0.711163	7.22672	0.863902	-7.08396	0.872085	-0.154737	0.912689
all-unigene000443	-7.62922	0.739393	#N/A	#N/A	#N/A	#N/A	#N/A	#N/A
all-unigene000444	-8.35751	0.628624	8.72689	0.558663	#N/A	#N/A	5.63578	0.919937
all-unigene000445	1.74354	0.519016	-0.516679	0.900784	0.0489988	0.916893	#N/A	#N/A
all-unigene000446	0.0438441	0.907133	-0.235027	0.914679	#N/A	#N/A	8.31626	0.609534
all-unigene000447	0.0529251	0.888784	-0.0426512	0.92156	-0.955099	0.873632	-9.82858	0.0776807
all-unigene000448	-7.62922	0.739393	-1.03522	0.890661	#N/A	#N/A	#N/A	#N/A
all-unigene000449	#N/A	#N/A	#N/A	#N/A	#N/A	#N/A	#N/A	#N/A
all-unigene000450	-8.62557	0.479719	-6.67935	0.86949	#N/A	#N/A	#N/A	#N/A
all-unigene000451	-0.136609	0.912321	0.667319	0.899227	-0.418453	0.944293	0.758751	0.906412
all-unigene000452	-0.0589031	0.89757	-0.2645	0.917522	#N/A	#N/A	8.06558	0.741195
all-unigene000453	0.11016	0.882097	-9.41792	0.22011	-8.8882	0.47711	8.64874	0.56272
all-unigene000454	-2.27243	0.520835	-0.305172	0.908911	0.148922	0.93066	-2.28822	0.541007
all-unigene000455	-10.3736	0.0125014	#N/A	#N/A	#N/A	#N/A	#N/A	#N/A
all-unigene000456	-1.53182	0.825214	-0.0422733	0.906099	#N/A	#N/A	#N/A	#N/A
all-unigene000457	-0.000516132	0.937008	0.447539	0.949071	-1.3522	0.84432	-7.9835	0.716457
all-unigene000458	-9.43136	0.167786	#N/A	#N/A	#N/A	#N/A	#N/A	#N/A
all-unigene000459	-7.88504	0.734102	#N/A	#N/A	-1.57197	0.868181	#N/A	#N/A
all-unigene000460	-11.0502	0.00101397	#N/A	#N/A	3.19194	0.939071	-8.35197	0.690342
all-unigene000461	-9.59464	0.148003	11.3737	0.0001283	-1.55951	0.663015	-7.84818	0.795097
all-unigene000462	10.0813	0.0302252	#N/A	#N/A	#N/A	#N/A	#N/A	#N/A
all-unigene000463	-9.69919	0.117134	-0.889512	0.895826	#N/A	#N/A	#N/A	#N/A
all-unigene000464	8.66934	0.454708	6.63708	0.872551	#N/A	#N/A	#N/A	#N/A
all-unigene000465	-6.63649	0.838116	-6.67935	0.86949	#N/A	#N/A	#N/A	#N/A
all-unigene000466	-2.75143	0.52834	0.95387	0.882654	#N/A	#N/A	#N/A	#N/A
all-unigene000467	-1.63608	0.457135	-1.42905	0.698985	0.978235	0.942519	3.87532	1.55e-08
all-unigene000468	1.52739	0.681158	0.989992	0.845093	0.154009	0.919943	-10.058	0.039879
all-unigene000469	6.67993	0.834342	#N/A	#N/A	#N/A	#N/A	#N/A	#N/A
all-unigene000470	-10.4528	0.0116534	#N/A	#N/A	#N/A	#N/A	#N/A	#N/A
all-unigene000471	-1.02526	0.819733	-1.41217	0.825626	-9.96396	0.0559801	1.04218	0.834361
all-unigene000472	-0.455774	0.87441	8.21234	0.713628	8.99336	0.415499	7.12669	0.863862
all-unigene000473	-10.4528	0.0116534	-10.7535	0.00260811	#N/A	#N/A	9.59455	0.145101
all-unigene000474	#N/A	#N/A	#N/A	#N/A	#N/A	#N/A	#N/A	#N/A
all-unigene000475	-2.41267	0.204382	-0.777629	0.888691	-0.943718	0.890482	#N/A	#N/A
all-unigene000476	-3.81973	0.056462	-8.65065	0.580578	#N/A	#N/A	#N/A	#N/A
all-unigene000477	-2.10305	0.478941	-2.22869	0.665016	-8.37621	0.672958	#N/A	#N/A
all-unigene000478	-0.340759	0.885433	0.422299	0.906113	7.56377	0.827351	-7.5025	0.838467
all-unigene000479	#N/A	#N/A	#N/A	#N/A	#N/A	#N/A	#N/A	#N/A
all-unigene000480	1.94846	0.435156	-5.62856	0.512057	-2.63163	0.391765	6.24663	0.0726667
all-unigene000481	-6.63649	0.838116	7.62981	0.787488	#N/A	#N/A	#N/A	#N/A
all-unigene000482	-0.939088	0.831774	-0.19461	0.938658	-0.00511502	0.94048	-0.0967402	0.924616
all-unigene000483	0.218146	0.888908	#N/A	#N/A	#N/A	#N/A	6.98912	0.873829
all-unigene000484	-1.72025	0.619821	0.26627	0.907607	#N/A	#N/A	#N/A	#N/A
all-unigene000485	-7.89104	0.692102	-7.24037	0.830088	7.13309	0.825384	7.73355	0.749395
all-unigene000486	-10.4303	0.0101915	-8.66875	0.512306	#N/A	#N/A	#N/A	#N/A
all-unigene000487	-10.7102	0.00344455	-1.39491	0.84372	8.97014	0.347524	10.7798	0.00151617
all-unigene000488	#N/A	#N/A	#N/A	#N/A	#N/A	#N/A	#N/A	#N/A
all-unigene000489	-2.23947	0.308048	0.152999	0.919333	-0.969685	0.847549	0.256411	0.914725
all-unigene000490	-2.24546	0.488286	-8.87617	0.423736	-7.62643	0.770055	-7.8062	0.750067
all-unigene000491	-7.62922	0.739393	#N/A	#N/A	#N/A	#N/A	-6.57615	0.867478
all-unigene000492	2.27719	0.720927	-0.194494	0.91555	5.69669	0.920641	#N/A	#N/A
all-unigene000493	-6.63649	0.862996	#N/A	#N/A	#N/A	#N/A	#N/A	#N/A
all-unigene000494	-9.94531	0.0623419	#N/A	#N/A	#N/A	#N/A	#N/A	#N/A
all-unigene000495	-0.954747	0.83357	0.541525	0.902522	-0.213416	0.931997	-0.681678	0.893857
all-unigene000496	-0.312869	0.884874	0.290872	0.907491	#N/A	#N/A	6.74032	0.886924
all-unigene000497	-1.65414	0.655438	-0.0425542	0.906835	-0.364494	0.904102	-1.15238	0.861667
all-unigene000498	-1.53182	0.825214	#N/A	#N/A	#N/A	#N/A	#N/A	#N/A
all-unigene000499	-8.52115	0.576331	#N/A	#N/A	8.1068	0.737224	8.73016	0.530831
all-unigene000500	#N/A	#N/A	#N/A	#N/A	#N/A	#N/A	#N/A	#N/A
all-unigene000501	-1.18409	0.813379	#N/A	#N/A	-7.35045	0.851751	#N/A	#N/A
all-unigene000502	-6.63649	0.862996	#N/A	#N/A	0.0492426	0.912007	#N/A	#N/A
all-unigene000503	-7.62922	0.775849	-6.67935	0.889583	#N/A	#N/A	#N/A	#N/A
all-unigene000504	-0.939522	0.824541	-0.350677	0.906092	0.734435	0.906188	-1.17523	0.887217
all-unigene000505	-1.17145	0.771994	-2.58845	0.205826	7.67567	0.758821	-8.13655	0.681879
all-unigene000506	#N/A	#N/A	#N/A	#N/A	#N/A	#N/A	6.74032	0.887502
all-unigene000507	-0.277429	0.879822	-1.36016	0.847076	7.67567	0.758821	#N/A	#N/A
all-unigene000508	-1.04231	0.812066	10.2087	0.0221801	#N/A	#N/A	-9.56286	0.148089
all-unigene000509	#N/A	#N/A	-6.67935	0.86949	#N/A	#N/A	#N/A	#N/A
all-unigene000510	-12.2661	9.02e-07	12.3777	1.16e-07	#N/A	#N/A	#N/A	#N/A
all-unigene000511	-6.63649	0.838116	#N/A	#N/A	#N/A	#N/A	#N/A	#N/A
all-unigene000512	-0.802907	0.852545	-0.235027	0.914679	-1.52625	0.859236	-6.57615	0.867478
all-unigene000513	-6.63649	0.838116	#N/A	#N/A	2.03843	0.797378	-1.82445	0.822903
all-unigene000514	-5.38508	0.00160989	2.38913	0.582656	-5.97565	0.915617	5.88882	0.91515
all-unigene000515	-8.21175	0.615021	6.63708	0.872551	0.0492426	0.904105	-0.828256	0.890841
all-unigene000516	#N/A	#N/A	#N/A	#N/A	#N/A	#N/A	#N/A	#N/A
all-unigene000517	#N/A	#N/A	#N/A	#N/A	#N/A	#N/A	#N/A	#N/A
all-unigene000518	-7.62922	0.775849	#N/A	#N/A	#N/A	#N/A	#N/A	#N/A
all-unigene000519	-0.952692	0.853673	-1.61782	0.865467	6.68271	0.892847	-6.57615	0.897045
all-unigene000520	-2.32773	0.685637	0.764938	0.905101	-0.476588	0.906168	0.229145	0.905171
all-unigene000521	-1.53182	0.825214	-8.2549	0.655138	#N/A	#N/A	#N/A	#N/A
all-unigene000522	-0.671951	0.880248	1.4374	0.694009	#N/A	#N/A	#N/A	#N/A
all-unigene000523	-1.79233	0.796186	-1.24837	0.88159	-7.63359	0.768975	1.7401	0.839449
all-unigene000524	-0.540345	0.875352	-0.679515	0.895654	0.465392	0.916647	-1.09674	0.806643
all-unigene000525	-9.22127	0.242471	#N/A	#N/A	9.38446	0.174125	-2.08966	0.39582
all-unigene000526	-6.63649	0.866885	#N/A	#N/A	#N/A	#N/A	#N/A	#N/A
all-unigene000527	-1.95349	0.494216	-2.12734	0.403684	-0.943718	0.890482	-6.57615	0.867478
all-unigene000528	-0.665756	0.862458	9.19543	0.343371	#N/A	#N/A	8.19114	0.711831
all-unigene000529	-8.21175	0.661444	0.950461	0.900755	6.68271	0.892847	-6.57615	0.897045
all-unigene000530	-9.89695	0.0563528	-0.0422733	0.906099	1.04196	0.887478	6.74032	0.854821
all-unigene000531	-8.21175	0.615021	0.950461	0.893147	0.0493244	0.906675	6.74032	0.854821
all-unigene000532	-6.96692	0.815348	#N/A	#N/A	7.67567	0.758821	#N/A	#N/A
all-unigene000533	0.457589	0.874161	6.63708	0.892218	#N/A	#N/A	#N/A	#N/A
all-unigene000534	-1.94564	0.784102	#N/A	#N/A	#N/A	#N/A	#N/A	#N/A
all-unigene000535	0.0436595	0.882119	#N/A	#N/A	6.68271	0.892847	#N/A	#N/A
all-unigene000536	-2.25038	0.356871	#N/A	#N/A	#N/A	#N/A	6.74032	0.887502
all-unigene000537	-6.63649	0.838116	6.63708	0.872551	#N/A	#N/A	#N/A	#N/A
all-unigene000538	-7.62922	0.739393	-1.61782	0.856452	#N/A	#N/A	#N/A	#N/A
all-unigene000539	0.892294	0.849523	#N/A	#N/A	-0.0770316	0.963935	-0.400243	0.946165
all-unigene000540	-2.38563	0.683437	8.35376	0.675895	0.0492426	0.912007	-6.57615	0.897045
all-unigene000541	#N/A	#N/A	7.18825	0.860934	#N/A	#N/A	#N/A	#N/A
all-unigene000542	#N/A	#N/A	-2.81632	0.811194	#N/A	#N/A	-6.57615	0.897576
all-unigene000543	#N/A	#N/A	#N/A	#N/A	#N/A	#N/A	#N/A	#N/A
all-unigene000544	#N/A	#N/A	#N/A	#N/A	6.68271	0.857739	#N/A	#N/A
all-unigene000545	-8.94677	0.352475	#N/A	#N/A	#N/A	#N/A	#N/A	#N/A
all-unigene000546	#N/A	#N/A	7.46259	0.843433	#N/A	#N/A	#N/A	#N/A
all-unigene000547	#N/A	#N/A	#N/A	#N/A	#N/A	#N/A	#N/A	#N/A
all-unigene000548	-0.486185	0.885995	-0.0426427	0.918321	0.0493244	0.906675	-1.24661	0.833902
all-unigene000549	0.0437902	0.884607	-1.45618	0.723816	0.0492426	0.904105	1.16159	0.863807
all-unigene000550	-9.0415	0.359781	-9.14543	0.345151	#N/A	#N/A	#N/A	#N/A
all-unigene000551	-7.62922	0.739393	#N/A	#N/A	#N/A	#N/A	#N/A	#N/A
all-unigene000552	#N/A	#N/A	-8.27867	0.691228	#N/A	#N/A	#N/A	#N/A
all-unigene000553	-10.0415	0.0456697	1.72417	0.694126	0.176856	0.911296	-0.977527	0.875705
all-unigene000554	-6.63649	0.838116	7.62981	0.787488	-0.943718	0.890482	0.164164	0.900501
all-unigene000555	-1.53798	0.736745	-0.45641	0.901865	#N/A	#N/A	-7.56857	0.786059
all-unigene000556	-1.72174	0.654111	-0.777058	0.890648	#N/A	#N/A	#N/A	#N/A
all-unigene000557	-0.925283	0.849225	8.32745	0.683365	7.1945	0.862832	#N/A	#N/A
all-unigene000558	-0.789721	0.850619	1.49276	0.868611	9.14364	0.341454	7.95908	0.762945
all-unigene000559	-10.4879	0.00823947	-1.70525	0.756501	#N/A	#N/A	#N/A	#N/A
all-unigene000560	#N/A	#N/A	#N/A	#N/A	-6.63371	0.895847	#N/A	#N/A
all-unigene000561	-1.08571	0.830018	0.262621	0.972327	-0.86251	0.888311	-1.5585	0.490164
all-unigene000562	#N/A	#N/A	#N/A	#N/A	#N/A	#N/A	#N/A	#N/A
all-unigene000563	-9.43136	0.199057	-2.56911	0.680028	0.186453	0.909749	-8.151	0.738411
all-unigene000564	-1.70122	0.556207	-9.43706	0.180474	0.557651	0.898242	-6.57615	0.867478
all-unigene000565	-9.77088	0.0786389	-9.53505	0.146206	#N/A	#N/A	#N/A	#N/A
all-unigene000566	-0.894037	0.835324	#N/A	#N/A	#N/A	#N/A	-0.339449	0.903387
all-unigene000567	8.25069	0.645296	0.936035	0.901195	1.06347	0.900236	-0.827645	0.88981
all-unigene000568	-6.63649	0.838116	-6.67935	0.86949	1.80216	0.751281	-6.57615	0.867478
all-unigene000569	-9.49182	0.182629	#N/A	#N/A	#N/A	#N/A	#N/A	#N/A
all-unigene000570	-1.94564	0.784102	0.95387	0.886296	#N/A	#N/A	1.1574	0.893361
all-unigene000571	-1.75848	0.725246	0.540049	0.899568	-8.62278	0.507612	1.16159	0.863807
all-unigene000572	-0.216914	0.894051	10.0937	0.0422153	-1.6363	0.77444	9.72846	0.104519
all-unigene000573	-1.71868	0.710421	-9.57783	0.164557	#N/A	#N/A	-8.33941	0.693752
all-unigene000574	-7.30912	0.814236	#N/A	#N/A	#N/A	#N/A	#N/A	#N/A
all-unigene000575	-7.62922	0.781665	#N/A	#N/A	#N/A	#N/A	#N/A	#N/A
all-unigene000576	-7.62922	0.739393	#N/A	#N/A	#N/A	#N/A	#N/A	#N/A
all-unigene000577	-9.79347	0.0902089	#N/A	#N/A	#N/A	#N/A	#N/A	#N/A
all-unigene000578	-8.62557	0.479719	-7.67229	0.778479	-8.20896	0.647875	-0.417446	0.897727
all-unigene000579	-7.62922	0.739393	#N/A	#N/A	#N/A	#N/A	#N/A	#N/A
all-unigene000580	-2.53815	0.142731	-0.594907	0.911044	#N/A	#N/A	#N/A	#N/A
all-unigene000581	-3.17585	0.172032	7.07684	0.868822	-0.859474	0.874333	2.20972	0.742332
all-unigene000582	-1.07036	0.809604	1.53761	0.818931	-2.26683	0.55143	-1.82445	0.822903
all-unigene000583	-1.56899	0.75555	#N/A	#N/A	9.90889	0.060989	#N/A	#N/A
all-unigene000584	-9.81571	0.0700735	-1.06351	0.847445	#N/A	#N/A	#N/A	#N/A
all-unigene000585	-6.75962	0.856356	#N/A	#N/A	#N/A	#N/A	#N/A	#N/A
all-unigene000586	-10.4241	0.0134196	-0.206776	0.911336	-0.353404	0.909434	0.544055	0.895336
all-unigene000587	-6.63649	0.838116	#N/A	#N/A	-6.63371	0.861595	6.74032	0.854821
all-unigene000588	-11.1461	0.000645858	#N/A	#N/A	#N/A	#N/A	#N/A	#N/A
all-unigene000589	-1.17588	0.814414	-8.98997	0.372329	0.631851	0.896179	0.165255	0.902173
all-unigene000590	0.865192	0.84453	#N/A	#N/A	#N/A	#N/A	-9.28791	0.25015
all-unigene000591	-8.21175	0.661444	-1.36016	0.851179	-7.62643	0.822722	#N/A	#N/A
all-unigene000592	-1.94564	0.784102	6.63708	0.892218	#N/A	#N/A	-6.57615	0.897045
all-unigene000593	1.04012	0.84772	-1.03522	0.898436	1.04196	0.900774	#N/A	#N/A
all-unigene000594	-1.68832	0.510036	-0.346816	0.914141	-2.45027	0.0466157	-1.5916	0.580201
all-unigene000595	-2.75143	0.52834	-1.61782	0.856452	7.67567	0.758821	-6.57615	0.867478
all-unigene000596	-2.26684	0.716784	#N/A	#N/A	-6.63371	0.895847	-6.57615	0.897045
all-unigene000597	-1.09212	0.810307	-3.35148	0.259199	6.68271	0.857739	0.164981	0.900315
all-unigene000598	-1.50503	0.658899	0.206138	0.935616	#N/A	#N/A	-9.37049	0.216925
all-unigene000599	-2.06138	0.288698	0.0775659	0.943083	#N/A	#N/A	-7.56857	0.786059
all-unigene000600	#N/A	#N/A	#N/A	#N/A	#N/A	#N/A	#N/A	#N/A
all-unigene000601	-0.218757	0.883987	-0.264679	0.911913	-2.15292	0.613312	-8.88593	0.424506
all-unigene000602	#N/A	#N/A	#N/A	#N/A	#N/A	#N/A	-6.57615	0.867478
all-unigene000603	0.0434434	0.877692	#N/A	#N/A	#N/A	#N/A	#N/A	#N/A
all-unigene000604	-0.370088	0.875155	#N/A	#N/A	-8.14527	0.665173	-7.28394	0.818554
all-unigene000605	0.00422924	0.881369	#N/A	#N/A	#N/A	#N/A	#N/A	#N/A
all-unigene000606	-6.42126	0.876506	#N/A	#N/A	#N/A	#N/A	#N/A	#N/A
all-unigene000607	-0.268546	0.89804	10.7932	0.00201475	10.1293	0.0207645	#N/A	#N/A
all-unigene000608	-0.848305	0.839498	1.3125	0.830974	1.60284	0.81328	0.740393	0.887726
all-unigene000609	-1.33292	0.750498	-1.04082	0.860353	-0.36502	0.91082	-8.56477	0.552643
all-unigene000610	#N/A	#N/A	8.28706	0.705001	#N/A	#N/A	#N/A	#N/A
all-unigene000611	#N/A	#N/A	#N/A	#N/A	#N/A	#N/A	#N/A	#N/A
all-unigene000612	-10.5298	0.00874446	#N/A	#N/A	#N/A	#N/A	-1.48334	0.731941
all-unigene000613	-7.62922	0.775849	8.62616	0.585566	1.04196	0.900774	1.7401	0.854462
all-unigene000614	-1.69253	0.743855	1.36962	0.797263	1.28762	0.881615	2.64093	0.63125
all-unigene000615	-3.01987	0.400787	-1.85182	0.83124	-1.09918	0.811259	0.468588	0.931277
all-unigene000616	0.0434434	0.877692	1.36944	0.818949	0.463854	0.906828	-0.511453	0.899345
all-unigene000617	-1.46424	0.821522	-8.2549	0.697604	0.0492426	0.912007	-0.412989	0.90722
all-unigene000618	-9.24254	0.280762	#N/A	#N/A	#N/A	#N/A	#N/A	#N/A
all-unigene000619	#N/A	#N/A	#N/A	#N/A	#N/A	#N/A	#N/A	#N/A
all-unigene000620	0.590138	0.893909	-0.62637	0.896104	0.0410634	0.927744	0.580422	0.904673
all-unigene000621	1.50758	0.51819	-0.422831	0.918998	-6.2975	0.907435	#N/A	#N/A
all-unigene000622	-6.63649	0.866885	#N/A	#N/A	#N/A	#N/A	#N/A	#N/A
all-unigene000623	-6.63649	0.862996	#N/A	#N/A	0.0632151	0.916837	-5.91843	0.915549
all-unigene000624	-1.17588	0.814414	-9.25253	0.254608	8.25828	0.626744	1.01656	0.866618
all-unigene000625	-1.84316	0.652341	11.1092	0.000420074	-11.5275	2.12e-05	0.059622	0.933612
all-unigene000626	#N/A	#N/A	#N/A	#N/A	#N/A	#N/A	#N/A	#N/A
all-unigene000627	0.628329	0.876899	1.29021	0.751346	-0.948236	0.875458	-0.248513	0.902171
all-unigene000628	#N/A	#N/A	#N/A	#N/A	-6.63371	0.895847	#N/A	#N/A
all-unigene000629	-1.27666	0.755701	1.53994	0.742173	-0.650308	0.897684	0.486641	0.898149
all-unigene000630	0.849604	0.849127	0.692464	0.893116	-8.62278	0.507612	-1.41068	0.864003
all-unigene000631	1.04012	0.843403	-6.67935	0.86949	#N/A	#N/A	#N/A	#N/A
all-unigene000632	-10.7102	0.0042947	-9.98855	0.0518398	#N/A	#N/A	#N/A	#N/A
all-unigene000633	-1.13902	0.802784	1.92012	0.532701	#N/A	#N/A	-7.16559	0.866335
all-unigene000634	-2.12331	0.384174	-0.457292	0.911565	#N/A	#N/A	#N/A	#N/A
all-unigene000635	0.626263	0.866841	-0.842688	0.889013	#N/A	#N/A	#N/A	#N/A
all-unigene000636	-0.649304	0.866175	9.05283	0.353663	-9.11229	0.295361	-8.88593	0.424506
all-unigene000637	-1.07036	0.809604	1.12531	0.847185	-0.943718	0.890482	7.73355	0.749395
all-unigene000638	-0.625347	0.875663	-0.32108	0.915745	-0.998912	0.85102	8.10496	0.731282
all-unigene000639	-12.2492	1.01e-06	13.2559	8.07e-11	#N/A	#N/A	#N/A	#N/A
all-unigene000640	-0.296866	0.895023	-10.3855	0.0126975	-0.571982	0.905702	-0.200732	0.928261
all-unigene000641	-6.63649	0.862996	#N/A	#N/A	#N/A	#N/A	-6.57615	0.897045
all-unigene000642	-1.53876	0.702453	-9.72868	0.0909837	6.68271	0.857739	#N/A	#N/A
all-unigene000643	-8.17781	0.677673	#N/A	#N/A	#N/A	#N/A	#N/A	#N/A
all-unigene000644	0.0434434	0.877692	6.63708	0.872551	#N/A	#N/A	#N/A	#N/A
all-unigene000645	-0.178239	0.887791	-8.98997	0.372329	-2.26126	0.745306	-1.15238	0.861667
all-unigene000646	-0.949288	0.861743	-6.67935	0.86949	#N/A	#N/A	#N/A	#N/A
all-unigene000647	-11.2075	0.000462107	9.88707	0.0757721	7.80599	0.794539	#N/A	#N/A
all-unigene000648	-1.16105	0.765048	-1.52383	0.496839	#N/A	#N/A	#N/A	#N/A
all-unigene000649	-0.234103	0.893742	-1.41664	0.845244	8.00193	0.759493	#N/A	#N/A
all-unigene000650	-2.12059	0.594723	-2.3529	0.734334	#N/A	#N/A	#N/A	#N/A
all-unigene000651	2.08562	0.143663	1.40128	0.72526	1.65527	0.482452	0.313572	0.905529
all-unigene000652	-9.94531	0.0492269	-6.67935	0.86949	6.68271	0.857739	#N/A	#N/A
all-unigene000653	-11.193	0.00051535	-0.517095	0.907473	10.7712	0.00187156	-0.801154	0.870461
all-unigene000654	-1.94564	0.771721	0.693366	0.892361	6.68271	0.857739	6.74032	0.854821
all-unigene000655	-8.62557	0.539147	#N/A	#N/A	#N/A	#N/A	-7.83034	0.797792
all-unigene000656	-1.66565	0.519854	-0.528856	0.914429	6.68271	0.857739	#N/A	#N/A
all-unigene000657	-11.2664	0.000275557	#N/A	#N/A	#N/A	#N/A	#N/A	#N/A
all-unigene000658	-0.373682	0.87507	1.04127	0.853224	4.35752	0.00589793	11.5772	1.8e-05
all-unigene000659	-0.0579129	0.900439	-0.877092	0.877236	#N/A	#N/A	#N/A	#N/A
all-unigene000660	-1.77623	0.352907	1.10819	0.795337	#N/A	#N/A	-7.09759	0.870928
all-unigene000661	-8.94389	0.410343	7.61538	0.826863	0.969189	0.863301	-0.0660184	0.911118
all-unigene000662	-10.3213	0.0192945	-6.41341	0.904354	-7.76978	0.803205	-7.56857	0.831471
all-unigene000663	-0.949288	0.871294	#N/A	#N/A	#N/A	#N/A	#N/A	#N/A
all-unigene000664	-2.26684	0.716784	-8.2549	0.697604	#N/A	#N/A	#N/A	#N/A
all-unigene000665	#N/A	#N/A	#N/A	#N/A	#N/A	#N/A	#N/A	#N/A
all-unigene000666	-8.21175	0.615021	7.62981	0.787488	#N/A	#N/A	#N/A	#N/A
all-unigene000667	-11.0149	0.000917123	#N/A	#N/A	#N/A	#N/A	#N/A	#N/A
all-unigene000668	-0.470131	0.881822	-0.626799	0.897237	0.0494339	0.921721	-3.62908	0.117067
all-unigene000669	-1.27741	0.777467	1.94321	0.826975	-0.661551	0.88992	-1.41649	0.744844
all-unigene000670	-10.2612	0.0236584	-8.22095	0.71675	#N/A	#N/A	#N/A	#N/A
all-unigene000671	-0.612844	0.88023	#N/A	#N/A	#N/A	#N/A	#N/A	#N/A
all-unigene000672	-8.21175	0.615021	6.63708	0.872551	#N/A	#N/A	-0.828256	0.890841
all-unigene000673	-0.538872	0.869615	-1.03522	0.890661	0.0489988	0.90286	0.164164	0.900501
all-unigene000674	-2.41267	0.204382	-0.626799	0.897237	8.26784	0.623853	6.74032	0.854821
all-unigene000675	-0.315011	0.883668	0.394355	0.911778	-0.457158	0.906105	0.251301	0.930377
all-unigene000676	#N/A	#N/A	#N/A	#N/A	#N/A	#N/A	#N/A	#N/A
all-unigene000677	-8.62557	0.530547	-1.45464	0.80335	-0.392703	0.909272	9.72846	0.10394
all-unigene000678	-7.62922	0.739393	#N/A	#N/A	7.67567	0.758821	#N/A	#N/A
all-unigene000679	-7.62922	0.739393	#N/A	#N/A	#N/A	#N/A	#N/A	#N/A
all-unigene000680	-1.21284	0.758219	-0.331868	0.912901	7.67567	0.813501	0.164164	0.913436
all-unigene000681	-0.700904	0.861929	-7.67229	0.778479	-6.63371	0.861595	7.73355	0.749395
all-unigene000682	-7.62922	0.739393	-8.2549	0.655138	#N/A	#N/A	#N/A	#N/A
all-unigene000683	-1.25241	0.856651	-0.0425542	0.909071	7.32837	0.851752	-8.151	0.738411
all-unigene000684	-10.4303	0.0101915	0.950461	0.893147	#N/A	#N/A	#N/A	#N/A
all-unigene000685	-0.13519	0.881864	#N/A	#N/A	-0.833728	0.905199	-0.2974	0.904708
all-unigene000686	-0.752864	0.853275	0.424958	0.904046	1.06648	0.873429	0.215824	0.907656
all-unigene000687	#N/A	#N/A	#N/A	#N/A	#N/A	#N/A	#N/A	#N/A
all-unigene000688	-6.63649	0.838116	#N/A	#N/A	#N/A	#N/A	#N/A	#N/A
all-unigene000689	-6.63649	0.838116	#N/A	#N/A	#N/A	#N/A	-6.57615	0.867478
all-unigene000690	-9.62375	0.134723	-7.93415	0.768697	#N/A	#N/A	#N/A	#N/A
all-unigene000691	-2.25051	0.366294	0.0788371	0.921319	8.25828	0.700131	-7.56857	0.830653
all-unigene000692	#N/A	#N/A	-6.67935	0.889583	-6.63371	0.895847	-6.57615	0.897045
all-unigene000693	-0.338494	0.878048	7.57868	0.831119	-7.60474	0.825133	0.11807	0.906575
all-unigene000694	-10.2081	0.022019	6.63708	0.872551	#N/A	#N/A	-6.57615	0.867478
all-unigene000695	-8.40858	0.613096	7.28257	0.85954	7.33747	0.850736	-3.3323	0.902487
all-unigene000696	-9.93228	0.0510734	-0.622777	0.89629	-0.614627	0.898272	0.164164	0.900501
all-unigene000697	-10.2081	0.022019	#N/A	#N/A	-6.63371	0.861595	-6.57615	0.867478
all-unigene000698	-7.92067	0.727327	#N/A	#N/A	-7.14535	0.868063	8.12152	0.727469
all-unigene000699	-7.62922	0.739393	#N/A	#N/A	#N/A	#N/A	#N/A	#N/A
all-unigene000700	-0.692486	0.868604	-1.15019	0.816074	1.44086	0.772551	1.43849	0.75428
all-unigene000701	-0.691286	0.862473	0.287738	0.909034	0.0493654	0.909429	0.165475	0.906994
all-unigene000702	-7.43762	0.766837	#N/A	#N/A	#N/A	#N/A	8.56649	0.521556
all-unigene000703	-1.62664	0.640597	1.36769	0.737804	-0.189631	0.912027	-1.15305	0.833299
all-unigene000704	-1.53798	0.736745	0.997594	0.880464	-7.62643	0.770055	-6.57615	0.867478
all-unigene000705	-6.63649	0.838116	-0.0424836	0.905307	0.0489988	0.90286	6.74032	0.854821
all-unigene000706	-0.732921	0.861135	-1.74057	0.6571	-1.52625	0.859236	#N/A	#N/A
all-unigene000707	-6.63649	0.838116	-0.0422733	0.906099	-0.943718	0.890482	-1.41068	0.864003
all-unigene000708	-2.54846	0.612488	-1.03522	0.890661	#N/A	#N/A	-6.57615	0.867478
all-unigene000709	-10.3235	0.0149103	2.04185	0.131923	#N/A	#N/A	#N/A	#N/A
all-unigene000710	0.354235	0.877358	7.62981	0.817844	-1.86737	0.737725	8.75159	0.520225
all-unigene000711	-0.732921	0.861135	0.693667	0.89441	-0.213351	0.923181	0.165599	0.914111
all-unigene000712	-2.6506	0.306642	-2.83751	0.547107	6.68271	0.857739	#N/A	#N/A
all-unigene000713	-0.655913	0.864348	-9.83671	0.0815258	9.25592	0.287392	9.53606	0.165831
all-unigene000714	-1.78242	0.727472	-1.36592	0.851064	0.453121	0.903987	-2.11402	0.790719
all-unigene000715	-0.949288	0.861743	-6.67935	0.86949	#N/A	#N/A	#N/A	#N/A
all-unigene000716	-2.13543	0.292457	1.50533	0.732303	#N/A	#N/A	#N/A	#N/A
all-unigene000717	-2.75744	0.247645	-2.3529	0.734334	-1.11852	0.84655	-8.56477	0.552643
all-unigene000718	-10.6228	0.00610064	#N/A	#N/A	#N/A	#N/A	#N/A	#N/A
all-unigene000719	-8.35751	0.620579	-1.03894	0.881412	0.730729	0.909294	-6.57615	0.897045
all-unigene000720	0.0810151	0.939638	-0.929433	0.861713	9.07998	0.298467	0.508891	0.896996
all-unigene000721	-0.890854	0.836215	-1.74005	0.539929	7.67567	0.813501	#N/A	#N/A
all-unigene000722	8.24103	0.655733	8.44632	0.659328	#N/A	#N/A	-0.0737449	0.907776
all-unigene000723	-6.63649	0.866885	#N/A	#N/A	#N/A	#N/A	#N/A	#N/A
all-unigene000724	-7.62922	0.739393	#N/A	#N/A	#N/A	#N/A	#N/A	#N/A
all-unigene000725	-2.08903	0.089169	0.0998466	0.961376	-8.84567	0.496089	1.97372	0.745717
all-unigene000726	-8.21175	0.661444	6.63708	0.892218	0.0493244	0.910714	-0.0719271	0.908968
all-unigene000727	0.0437321	0.878524	#N/A	#N/A	0.0489988	0.90286	-6.57615	0.867478
all-unigene000728	-1.5332	0.737473	-1.61782	0.865467	-7.62643	0.822722	6.74032	0.886924
all-unigene000729	-0.385913	0.878331	0.304097	0.917319	-1.33183	0.807347	0.0238899	0.909772
all-unigene000730	-1.40476	0.756605	9.88105	0.0770862	0.487271	0.90223	-0.338106	0.90298
all-unigene000731	-0.630179	0.865711	-0.742576	0.887316	-1.4056	0.801547	-9.15325	0.374423
all-unigene000732	-1.43976	0.713975	-2.49612	0.438407	7.67567	0.758821	-1.41068	0.864003
all-unigene000733	-0.627935	0.868968	-1.6869	0.76511	-0.292137	0.914647	-1.41262	0.698431
all-unigene000734	-2.13588	0.222301	-2.26316	0.168138	0.860734	0.870312	-2.97364	0.387206
all-unigene000735	-0.952692	0.854604	-0.284764	0.909219	1.61036	0.867962	-0.842619	0.902507
all-unigene000736	-6.75962	0.856356	-6.67935	0.889583	#N/A	#N/A	-6.57615	0.897045
all-unigene000737	#N/A	#N/A	#N/A	#N/A	#N/A	#N/A	#N/A	#N/A
all-unigene000738	5.8289	0.87092	#N/A	#N/A	#N/A	#N/A	5.36624	0.900957
all-unigene000739	-10.5259	0.00920747	1.25417	0.83616	#N/A	#N/A	9.31639	0.257736
all-unigene000740	-9.08663	0.295496	-7.80915	0.75619	-9.1225	0.290875	-9.37049	0.216925
all-unigene000741	-1.104	0.829938	-8.27394	0.649668	#N/A	#N/A	0.209063	0.90099
all-unigene000742	-1.53876	0.702453	-0.0172544	0.920734	#N/A	#N/A	-8.88593	0.424506
all-unigene000743	#N/A	#N/A	6.63708	0.872551	#N/A	#N/A	#N/A	#N/A
all-unigene000744	0.0436595	0.876502	#N/A	#N/A	-6.63371	0.861595	#N/A	#N/A
all-unigene000745	0.706661	0.868904	-0.977078	0.862336	-10.0427	0.0311532	-0.913255	0.869837
all-unigene000746	-3.65004	0.0133237	-1.1414	0.832402	#N/A	#N/A	#N/A	#N/A
all-unigene000747	-9.67853	0.0986137	#N/A	#N/A	6.9434	0.840865	-2.09706	0.73294
all-unigene000748	-0.983251	0.831229	1.53394	0.724784	-2.55129	0.496189	-0.205083	0.900947
all-unigene000749	-10.3235	0.0184651	0.57493	0.901166	#N/A	#N/A	#N/A	#N/A
all-unigene000750	-9.8546	0.0770667	0.404909	0.905172	-8.59737	0.599131	#N/A	#N/A
all-unigene000751	-1.82889	0.473365	0.573664	0.913422	#N/A	#N/A	#N/A	#N/A
all-unigene000752	-8.20695	0.670292	-8.03807	0.757811	0.586283	0.899354	#N/A	#N/A
all-unigene000753	-9.79507	0.0898456	0.955012	0.876447	#N/A	#N/A	#N/A	#N/A
all-unigene000754	-0.425328	0.891985	0.319471	0.910466	-0.720626	0.885551	-1.69726	0.469607
all-unigene000755	-0.76437	0.85085	-0.454047	0.903285	1.17934	0.853023	0.136247	0.90712
all-unigene000756	-7.05504	0.841189	#N/A	#N/A	#N/A	#N/A	#N/A	#N/A
all-unigene000757	-10.5298	0.00874446	-1.06549	0.881653	#N/A	#N/A	#N/A	#N/A
all-unigene000758	-11.6927	3.76e-05	-10.5517	0.00677509	8.99336	0.415105	#N/A	#N/A
all-unigene000759	-1.68788	0.623912	9.57673	0.140313	#N/A	#N/A	#N/A	#N/A
all-unigene000760	-3.11353	0.34763	-8.2549	0.655138	7.67567	0.758821	#N/A	#N/A
all-unigene000761	#N/A	#N/A	#N/A	#N/A	#N/A	#N/A	#N/A	#N/A
all-unigene000762	-9.80781	0.0869914	5.30112	0.924066	9.25592	0.287392	6.0334	0.384366
all-unigene000763	-2.42575	0.480775	0.00373099	0.910015	7.93753	0.772123	-0.397654	0.902376
all-unigene000764	-8.94677	0.352475	-8.66875	0.512306	#N/A	#N/A	#N/A	#N/A
all-unigene000765	-0.31829	0.883871	-0.625087	0.901176	-1.03192	0.806694	-1.0572	0.80803
all-unigene000766	1.21946	0.747525	-11.0841	0.0004049	#N/A	#N/A	#N/A	#N/A
all-unigene000767	-2.52938	0.619556	-0.192646	0.906237	0.208977	0.907564	-8.56477	0.552643
all-unigene000768	-8.16301	0.628258	#N/A	#N/A	#N/A	#N/A	#N/A	#N/A
all-unigene000769	0.274136	0.898178	1.35447	0.748203	0.522068	0.899394	-1.04556	0.883514
all-unigene000770	-0.953833	0.842118	8.62616	0.53744	#N/A	#N/A	-6.57615	0.867478
all-unigene000771	-6.63649	0.838116	-6.67935	0.86949	#N/A	#N/A	#N/A	#N/A
all-unigene000772	-0.232405	0.918489	-10.2477	0.0175009	6.68271	0.857739	#N/A	#N/A
all-unigene000773	-1.43509	0.739245	-0.45641	0.901865	#N/A	#N/A	-6.57615	0.867478
all-unigene000774	1.62415	0.812457	-0.396182	0.90276	-0.504303	0.909594	0.438344	0.913097
all-unigene000775	#N/A	#N/A	#N/A	#N/A	#N/A	#N/A	#N/A	#N/A
all-unigene000776	#N/A	#N/A	#N/A	#N/A	#N/A	#N/A	-7.56857	0.786059
all-unigene000777	-8.94677	0.400684	-8.66875	0.561021	#N/A	#N/A	#N/A	#N/A
all-unigene000778	-9.62375	0.111981	1.45649	0.81672	#N/A	#N/A	#N/A	#N/A
all-unigene000779	#N/A	#N/A	#N/A	#N/A	#N/A	#N/A	#N/A	#N/A
all-unigene000780	-0.952692	0.853673	-0.0422733	0.914347	8.25828	0.700131	6.72595	0.887612
all-unigene000781	-1.91587	0.519748	-3.30596	0.804137	7.49221	0.835644	7.23208	0.855692
all-unigene000782	-1.86443	0.496086	-0.309878	0.915215	#N/A	#N/A	#N/A	#N/A
all-unigene000783	-11.6224	4.25e-05	-11.2508	0.000162263	#N/A	#N/A	#N/A	#N/A
all-unigene000784	-1.2111	0.72514	-0.637031	0.899037	#N/A	#N/A	#N/A	#N/A
all-unigene000785	-1.63574	0.584982	0.319128	0.906922	0.175208	0.945311	-0.374116	0.913521
all-unigene000786	0.0434434	0.88827	-0.777629	0.889916	1.36693	0.851285	-1.00241	0.857628
all-unigene000787	-0.136609	0.905813	-0.290457	0.925027	-0.75642	0.88739	0.248127	0.921573
all-unigene000788	-1.75848	0.725246	1.53299	0.862522	1.04196	0.887478	-0.828256	0.890841
all-unigene000789	-2.62542	0.12941	2.60959	0.0437201	6.68271	0.857739	8.67888	0.476672
all-unigene000790	0.029432	0.889939	#N/A	#N/A	#N/A	#N/A	-9.65866	0.154975
all-unigene000791	-6.63649	0.838116	#N/A	#N/A	-6.63371	0.861595	-6.57615	0.867478
all-unigene000792	-6.63649	0.838116	-6.67935	0.86949	#N/A	#N/A	#N/A	#N/A
all-unigene000793	-10.8554	0.00233371	9.34501	0.262085	#N/A	#N/A	#N/A	#N/A
all-unigene000794	-10.1164	0.0363933	8.94736	0.449687	-1.09172	0.887434	0.709466	0.892179
all-unigene000795	-8.62557	0.479719	#N/A	#N/A	#N/A	#N/A	#N/A	#N/A
all-unigene000796	-1.94564	0.771721	-8.66875	0.512306	-0.948236	0.875458	1.7401	0.839449
all-unigene000797	-4.18579	0.0050689	2.22995	0.606403	-10.2232	0.022992	8.2823	0.687722
all-unigene000798	-3.06863	0.027879	0.363064	0.92235	0.423501	0.909436	-1.54674	0.79682
all-unigene000799	-1.48543	0.823277	0.018444	0.906999	0.373419	0.91503	-0.734435	0.885248
all-unigene000800	-0.949288	0.873048	0.113809	0.910802	#N/A	#N/A	-6.57615	0.897576
all-unigene000801	#N/A	#N/A	#N/A	#N/A	#N/A	#N/A	#N/A	#N/A
all-unigene000802	-0.776107	0.857921	-0.128214	0.922828	0.480033	0.930501	0.284586	0.945337
all-unigene000803	-6.63649	0.838116	1.53299	0.862522	1.04571	0.875814	0.164164	0.900501
all-unigene000804	-0.41511	0.887239	#N/A	#N/A	#N/A	#N/A	#N/A	#N/A
all-unigene000805	-8.62557	0.479719	0.371267	0.903908	#N/A	#N/A	#N/A	#N/A
all-unigene000806	-1.27597	0.777809	-0.0426605	0.9224	7.67567	0.813501	-0.828256	0.90246
all-unigene000807	0.0434434	0.877692	-1.03522	0.890661	-6.63371	0.861595	0.164164	0.900501
all-unigene000808	-8.21175	0.615021	-6.67935	0.86949	-7.62643	0.770055	-6.57615	0.867478
all-unigene000809	-7.62203	0.776864	-0.702723	0.899094	-0.023085	0.931753	-0.339087	0.912219
all-unigene000810	#N/A	#N/A	5.6515	0.903779	#N/A	#N/A	#N/A	#N/A
all-unigene000811	-6.63649	0.838116	#N/A	#N/A	#N/A	#N/A	#N/A	#N/A
all-unigene000812	-6.63649	0.862996	#N/A	#N/A	#N/A	#N/A	#N/A	#N/A
all-unigene000813	-8.94677	0.352475	-2.83751	0.547107	-1.23911	0.763	-1.47696	0.664594
all-unigene000814	-6.63649	0.862996	-6.67935	0.889583	-6.46739	0.90213	#N/A	#N/A
all-unigene000815	-0.287922	0.927311	-0.0343239	0.951716	-0.226797	0.935478	0.933141	0.841269
all-unigene000816	-4.57146	0.00996226	1.6615	0.693371	8.6829	0.555819	#N/A	#N/A
all-unigene000817	-1.94224	0.640381	#N/A	#N/A	0.169522	0.910038	-1.70904	0.73214
all-unigene000818	-0.883863	0.842625	-0.553324	0.899599	#N/A	#N/A	-7.9727	0.718694
all-unigene000819	#N/A	#N/A	#N/A	#N/A	#N/A	#N/A	#N/A	#N/A
all-unigene000820	-1.53182	0.837756	#N/A	#N/A	1.46141	0.799108	0.155703	0.90608
all-unigene000821	#N/A	#N/A	#N/A	#N/A	#N/A	#N/A	#N/A	#N/A
all-unigene000822	-3.64355	0.11406	0.804087	0.882952	-6.63371	0.861595	-6.57615	0.867478
all-unigene000823	-10.2081	0.022019	6.63708	0.872551	#N/A	#N/A	6.74032	0.854821
all-unigene000824	#N/A	#N/A	#N/A	#N/A	0.0979788	0.902742	0.982819	0.885654
all-unigene000825	-8.91769	0.421606	8.46655	0.652946	#N/A	#N/A	#N/A	#N/A
all-unigene000826	-2.26739	0.461534	-8.86679	0.427912	#N/A	#N/A	-6.53268	0.869498
all-unigene000827	-1.27745	0.713427	0.574289	0.925697	-0.365284	0.922368	0.336683	0.920952
all-unigene000828	0.398541	0.89263	6.63708	0.872551	1.17219	0.827083	-0.766079	0.882258
all-unigene000829	-10.2978	0.020912	-0.534321	0.90714	#N/A	#N/A	#N/A	#N/A
all-unigene000830	1.10825	0.815097	-8.66875	0.561021	#N/A	#N/A	-8.50977	0.642016
all-unigene000831	#N/A	#N/A	-6.67935	0.86949	-8.94397	0.370413	-1.41068	0.864003
all-unigene000832	#N/A	#N/A	#N/A	#N/A	#N/A	#N/A	#N/A	#N/A
all-unigene000833	-1.94564	0.771721	-9.83671	0.0675197	0.0522725	0.912111	0.165255	0.902173
all-unigene000834	-8.54036	0.510791	-9.47459	0.166877	-1.20713	0.87483	-6.57615	0.867478
all-unigene000835	-3.9429	0.0454863	-8.2549	0.655138	8.67214	0.477826	-0.828256	0.890841
all-unigene000836	-1.3451	0.769071	-0.656177	0.891628	-1.36266	0.818779	-1.50374	0.828302
all-unigene000837	-6.63649	0.862996	-6.67935	0.889583	-6.63371	0.895847	6.74032	0.886924
all-unigene000838	-10.2081	0.022019	#N/A	#N/A	#N/A	#N/A	11.1868	0.00018459
all-unigene000839	-6.63649	0.862996	#N/A	#N/A	#N/A	#N/A	#N/A	#N/A
all-unigene000840	-2.17483	0.443525	-2.61546	0.646855	#N/A	#N/A	#N/A	#N/A
all-unigene000841	-6.63649	0.838116	-7.67229	0.778479	-8.62278	0.507612	8.31626	0.609534
all-unigene000842	-9.43136	0.199057	0.931636	0.875646	0.380668	0.907104	1.74997	0.825346
all-unigene000843	-6.63649	0.866885	#N/A	#N/A	#N/A	#N/A	#N/A	#N/A
all-unigene000844	-1.8531	0.460549	0.561293	0.906519	-1.93329	0.657157	-0.970364	0.859074
all-unigene000845	-1.88453	0.634332	-8.98997	0.372329	-8.62278	0.507612	8.1433	0.660029
all-unigene000846	-2.12059	0.594723	-8.98997	0.372329	#N/A	#N/A	#N/A	#N/A
all-unigene000847	#N/A	#N/A	#N/A	#N/A	#N/A	#N/A	9.82596	0.0597116
all-unigene000848	1.36134	0.812613	0.950461	0.900755	0.0492426	0.912007	1.7401	0.854462
all-unigene000849	-11.2057	0.000484516	8.34378	0.0710901	-9.61372	0.147417	#N/A	#N/A
all-unigene000850	-7.43762	0.805707	0.497777	0.901686	-1.56851	0.941408	#N/A	#N/A
all-unigene000851	-5.70572	0.30527	#N/A	#N/A	0.90422	0.879589	9.14884	0.27168
all-unigene000852	-7.62922	0.775849	#N/A	#N/A	0.0489988	0.916893	#N/A	#N/A
all-unigene000853	-0.848305	0.839498	-10.6175	0.00509694	#N/A	#N/A	#N/A	#N/A
all-unigene000854	6.67993	0.834342	-1.03522	0.890661	0.463183	0.901667	0.900409	0.876527
all-unigene000855	-12.2824	8.12e-07	#N/A	#N/A	#N/A	#N/A	8.64493	0.490542
all-unigene000856	-7.62922	0.781665	-6.99846	0.878054	-6.63371	0.895701	-6.57615	0.897576
all-unigene000857	2.56491	0.80477	#N/A	#N/A	#N/A	#N/A	0.567968	0.895101
all-unigene000858	-2.28778	0.548258	-0.221686	0.908044	6.68271	0.857739	6.74032	0.854821
all-unigene000859	-0.477199	0.883471	0.278608	0.907533	-0.208895	0.90956	0.164164	0.913436
all-unigene000860	-1.09212	0.810307	-0.778983	0.884635	#N/A	#N/A	6.74032	0.854821
all-unigene000861	-9.79187	0.0745387	#N/A	#N/A	#N/A	#N/A	10.8327	0.0011745
all-unigene000862	-1.27597	0.780953	8.21234	0.672433	#N/A	#N/A	#N/A	#N/A
all-unigene000863	-8.62557	0.479719	-7.67229	0.778479	0.0489988	0.90286	#N/A	#N/A
all-unigene000864	-9.79347	0.0742323	#N/A	#N/A	#N/A	#N/A	7.73355	0.749395
all-unigene000865	-2.75744	0.247645	-1.55177	0.828939	-1.53238	0.775296	-0.248871	0.909933
all-unigene000866	-9.94531	0.0492269	-0.62637	0.896104	#N/A	#N/A	2.47526	0.694778
all-unigene000867	#N/A	#N/A	#N/A	#N/A	#N/A	#N/A	#N/A	#N/A
all-unigene000868	-0.93989	0.825027	0.145464	0.908622	-0.0499511	0.911757	-7.41741	0.845973
all-unigene000869	-1.10415	0.824995	-0.45614	0.904185	#N/A	#N/A	#N/A	#N/A
all-unigene000870	-0.486185	0.885995	-1.55383	0.785328	#N/A	#N/A	#N/A	#N/A
all-unigene000871	-9.00877	0.373958	-6.67935	0.889583	-6.91797	0.88229	-0.828256	0.90246
all-unigene000872	-2.45739	0.456603	0.804087	0.880393	0.0605235	0.910982	-2.26645	0.628452
all-unigene000873	-0.409308	0.884914	-0.960301	0.850831	-8.87919	0.480849	-1.30111	0.81497
all-unigene000874	-1.69156	0.608171	-9.10877	0.374749	0.407676	0.906686	#N/A	#N/A
all-unigene000875	-0.424542	0.879275	1.90191	0.336958	1.62457	0.867317	7.73355	0.800859
all-unigene000876	-2.32806	0.112098	-0.514009	0.910072	#N/A	#N/A	#N/A	#N/A
all-unigene000877	-11.3639	0.000219801	3.18089	0.341304	1.27605	0.715567	0.396252	0.913097
all-unigene000878	-1.53644	0.777093	0.109192	0.920975	0.631851	0.896179	0.165255	0.902173
all-unigene000879	-9.20932	0.247054	-6.67935	0.86949	#N/A	#N/A	#N/A	#N/A
all-unigene000880	0.37383	0.887653	-0.44521	0.903663	7.54031	0.830075	1.1574	0.893636
all-unigene000881	-7.94393	0.722762	-1.09099	0.844058	-1.35564	0.66928	0.646374	0.890243
all-unigene000882	-1.68982	0.687103	7.62981	0.787488	#N/A	#N/A	#N/A	#N/A
all-unigene000883	-1.68982	0.687103	9.62434	0.125597	#N/A	#N/A	#N/A	#N/A
all-unigene000884	-7.62922	0.775849	#N/A	#N/A	#N/A	#N/A	-6.57615	0.897045
all-unigene000885	-2.17483	0.443525	-0.363808	0.905607	#N/A	#N/A	#N/A	#N/A
all-unigene000886	-0.943017	0.83563	#N/A	#N/A	-12.6854	2.84e-09	11.2509	0.000128596
all-unigene000887	-6.63649	0.866885	#N/A	#N/A	#N/A	#N/A	#N/A	#N/A
all-unigene000888	#N/A	#N/A	#N/A	#N/A	#N/A	#N/A	#N/A	#N/A
all-unigene000889	-1.21754	0.782635	#N/A	#N/A	#N/A	#N/A	#N/A	#N/A
all-unigene000890	-8.62557	0.479719	-1.84478	0.75063	0.249509	0.904664	-1.04791	0.870512
all-unigene000891	-9.54605	0.132889	-3.92683	0.92185	-0.886714	0.866673	-0.432056	0.901675
all-unigene000892	#N/A	#N/A	6.63708	0.892218	-6.67594	0.894077	#N/A	#N/A
all-unigene000893	-11.1461	0.000495824	#N/A	#N/A	#N/A	#N/A	9.81582	0.0614981
all-unigene000894	-2.75744	0.247645	#N/A	#N/A	-7.94114	0.713535	#N/A	#N/A
all-unigene000895	-7.62922	0.739393	7.62981	0.787488	#N/A	#N/A	#N/A	#N/A
all-unigene000896	-6.63649	0.838116	#N/A	#N/A	#N/A	#N/A	-6.57615	0.867478
all-unigene000897	-0.260096	0.885289	#N/A	#N/A	#N/A	#N/A	#N/A	#N/A
all-unigene000898	-7.62922	0.775849	-1.03522	0.898436	0.631851	0.902904	-6.57615	0.897045
all-unigene000899	-8.21175	0.661444	6.63708	0.892218	#N/A	#N/A	#N/A	#N/A
all-unigene000900	-8.4498	0.591758	1.1386	0.893963	6.97874	0.877529	#N/A	#N/A
all-unigene000901	-8.11257	0.693426	7.92711	0.782148	#N/A	#N/A	-7.93423	0.781269
all-unigene000902	-2.6506	0.306642	-0.452808	0.901958	0.209837	0.934263	0.291084	0.918001
all-unigene000903	-0.949288	0.861743	-6.67935	0.86949	6.68271	0.857739	#N/A	#N/A
all-unigene000904	-6.63649	0.838116	-0.0422733	0.906099	0.0489988	0.90286	0.164164	0.900501
all-unigene000905	-8.21175	0.669056	6.94461	0.88225	#N/A	#N/A	#N/A	#N/A
all-unigene000906	0.628194	0.866815	0.540049	0.903325	-0.0858992	0.93129	1.0599	0.816773
all-unigene000907	-7.62922	0.775849	-1.03522	0.898436	0.463183	0.904652	-1.41068	0.876911
all-unigene000908	7.22146	0.78992	-0.0425994	0.90995	1.18405	0.859135	0.619754	0.893544
all-unigene000909	-0.370088	0.875155	9.43195	0.191039	#N/A	#N/A	#N/A	#N/A
all-unigene000910	#N/A	#N/A	#N/A	#N/A	#N/A	#N/A	#N/A	#N/A
all-unigene000911	2.58606	0.0284491	1.73501	0.733829	0.725549	0.88514	-1.25541	0.699576
all-unigene000912	-2.45551	0.664356	#N/A	#N/A	#N/A	#N/A	-7.13684	0.868979
all-unigene000913	#N/A	#N/A	#N/A	#N/A	#N/A	#N/A	#N/A	#N/A
all-unigene000914	-8.21175	0.661444	#N/A	#N/A	7.67567	0.813501	0.108162	0.913376
all-unigene000915	-7.62922	0.739393	-0.625087	0.897335	#N/A	#N/A	#N/A	#N/A
all-unigene000916	-9.79347	0.0742323	#N/A	#N/A	#N/A	#N/A	#N/A	#N/A
all-unigene000917	-1.27389	0.818576	-0.0425542	0.906835	1.62457	0.851888	0.20044	0.900106
all-unigene000918	-7.62922	0.775849	-6.67935	0.889583	-0.469133	0.908109	0.16553	0.907419
all-unigene000919	-6.63649	0.838116	#N/A	#N/A	6.68271	0.857739	6.74032	0.854821
all-unigene000920	-4.11272	0.024787	0.955584	0.870073	1.04196	0.887478	-9.14846	0.309545
all-unigene000921	-9.43136	0.167786	-2.61546	0.646855	#N/A	#N/A	#N/A	#N/A
all-unigene000922	0.0437321	0.878524	1.53916	0.778891	-0.464527	0.908896	-0.622256	0.901071
all-unigene000923	1.61899	0.830885	7.62981	0.825139	-8.71678	0.551799	-2.33376	0.652984
all-unigene000924	-6.63649	0.862996	#N/A	#N/A	#N/A	#N/A	#N/A	#N/A
all-unigene000925	-7.62922	0.739393	-6.67935	0.86949	#N/A	#N/A	#N/A	#N/A
all-unigene000926	#N/A	#N/A	#N/A	#N/A	-9.68953	0.122539	#N/A	#N/A
all-unigene000927	-1.53644	0.777093	0.246563	0.919277	-9.50277	0.142714	-0.0970508	0.908819
all-unigene000928	-1.4533	0.576962	1.51853	0.530124	-10.9403	0.000940565	0.955774	0.844118
all-unigene000929	#N/A	#N/A	#N/A	#N/A	#N/A	#N/A	#N/A	#N/A
all-unigene000930	-9.63808	0.134626	#N/A	#N/A	#N/A	#N/A	0.134505	0.907843
all-unigene000931	-2.4098	0.453101	0.371267	0.906082	0.204052	0.911343	1.98575	0.604587
all-unigene000932	-0.954404	0.837078	-0.5566	0.902858	0.0489988	0.90286	0.164164	0.900501
all-unigene000933	0.999071	0.819431	-0.256291	0.907618	-6.63371	0.895847	-6.57615	0.897045
all-unigene000934	-7.62922	0.739393	#N/A	#N/A	#N/A	#N/A	#N/A	#N/A
all-unigene000935	-7.34452	0.815711	#N/A	#N/A	#N/A	#N/A	#N/A	#N/A
all-unigene000936	-1.68657	0.775194	-1.04144	0.848699	0.396771	0.908396	-0.0406154	0.927163
all-unigene000937	-0.546068	0.869409	7.02321	0.849516	#N/A	#N/A	#N/A	#N/A
all-unigene000938	-8.62557	0.479719	#N/A	#N/A	#N/A	#N/A	6.74032	0.854821
all-unigene000939	-7.84852	0.740787	-0.0422733	0.914347	-6.63371	0.895847	-0.828256	0.90246
all-unigene000940	-11.4277	0.000120924	9.89306	0.0616064	#N/A	#N/A	#N/A	#N/A
all-unigene000941	-0.949288	0.871294	-6.67935	0.889583	6.68271	0.892847	6.74032	0.886924
all-unigene000942	-1.36826	0.779294	-0.0424836	0.905307	#N/A	#N/A	#N/A	#N/A
all-unigene000943	0.0434434	0.88827	#N/A	#N/A	#N/A	#N/A	#N/A	#N/A
all-unigene000944	-2.02437	0.384738	-1.36313	0.762162	#N/A	#N/A	#N/A	#N/A
all-unigene000945	-2.26684	0.702331	-6.67935	0.86949	#N/A	#N/A	#N/A	#N/A
all-unigene000946	-7.62922	0.739393	-6.54468	0.876023	#N/A	#N/A	#N/A	#N/A
all-unigene000947	-1.53182	0.825214	#N/A	#N/A	#N/A	#N/A	#N/A	#N/A
all-unigene000948	-1.45712	0.687546	-1.49976	0.759298	-0.479577	0.900066	0.165255	0.902173
all-unigene000949	-8.94677	0.352475	#N/A	#N/A	#N/A	#N/A	#N/A	#N/A
all-unigene000950	-6.63649	0.838116	#N/A	#N/A	#N/A	#N/A	#N/A	#N/A
all-unigene000951	1.61899	0.828833	-1.61782	0.865467	#N/A	#N/A	6.74032	0.886924
all-unigene000952	0.73737	0.92943	1.90626	0.0986637	5.90697	0.916754	-0.793554	0.88172
all-unigene000953	-7.71963	0.76846	#N/A	#N/A	#N/A	#N/A	#N/A	#N/A
all-unigene000954	-8.94677	0.352475	-0.0424836	0.905307	-0.686582	0.89321	0.900409	0.876527
all-unigene000955	-1.21754	0.782635	-10.1259	0.0270416	-0.49466	0.930211	0.548925	0.921194
all-unigene000956	-2.13557	0.561442	1.14883	0.818079	#N/A	#N/A	-8.88593	0.424506
all-unigene000957	-0.952692	0.849529	-0.0422733	0.906099	#N/A	#N/A	#N/A	#N/A
all-unigene000958	-1.53182	0.835778	6.63708	0.892218	#N/A	#N/A	#N/A	#N/A
all-unigene000959	-8.61111	0.485096	#N/A	#N/A	#N/A	#N/A	-6.57615	0.867478
all-unigene000960	-6.71973	0.862593	#N/A	#N/A	#N/A	#N/A	#N/A	#N/A
all-unigene000961	-0.28396	0.888006	-1.4292	0.809079	0.0208166	0.911993	1.2053	0.867814
all-unigene000962	-1.44611	0.688272	-0.774786	0.885737	0.338556	0.907205	-7.54688	0.833827
all-unigene000963	#N/A	#N/A	#N/A	#N/A	#N/A	#N/A	#N/A	#N/A
all-unigene000964	-1.53182	0.825214	1.12794	0.861438	0.311384	0.903683	0.438814	0.89755
all-unigene000965	-1.75848	0.730187	1.53299	0.871188	#N/A	#N/A	#N/A	#N/A
all-unigene000966	0.0434434	0.88827	7.62981	0.817844	#N/A	#N/A	#N/A	#N/A
all-unigene000967	1.03639	0.85864	-1.62272	0.805002	0.464078	0.911981	0.528042	0.911549
all-unigene000968	#N/A	#N/A	#N/A	#N/A	#N/A	#N/A	8.35877	0.59583
all-unigene000969	0.0434434	0.890139	-8.2549	0.708119	0.601196	0.895549	-2.75054	0.587882
all-unigene000970	-1.77812	0.749578	-0.625087	0.901176	-6.63371	0.895847	-7.57573	0.82986
all-unigene000971	-6.63649	0.838116	#N/A	#N/A	6.68271	0.857739	#N/A	#N/A
all-unigene000972	-8.21175	0.615021	#N/A	#N/A	#N/A	#N/A	#N/A	#N/A
all-unigene000973	1.46057	0.789363	-0.70559	0.973233	-0.982299	0.840327	-1.40349	0.73021
all-unigene000974	-6.63649	0.862996	#N/A	#N/A	#N/A	#N/A	#N/A	#N/A
all-unigene000975	-8.21175	0.615021	#N/A	#N/A	-0.943718	0.890482	8.31626	0.609534
all-unigene000976	#N/A	#N/A	#N/A	#N/A	#N/A	#N/A	#N/A	#N/A
all-unigene000977	-7.62922	0.775849	-8.2549	0.697604	#N/A	#N/A	#N/A	#N/A
all-unigene000978	-7.62922	0.781665	#N/A	#N/A	#N/A	#N/A	#N/A	#N/A
all-unigene000979	#N/A	#N/A	#N/A	#N/A	-8.16022	0.730562	-10.0439	0.0558588
all-unigene000980	-1.38461	0.827132	#N/A	#N/A	#N/A	#N/A	7.73355	0.799924
all-unigene000981	-1.27745	0.69322	-0.586813	0.914143	#N/A	#N/A	#N/A	#N/A
all-unigene000982	-8.6576	0.46767	-7.67229	0.778479	8.25828	0.626744	-7.56857	0.786059
all-unigene000983	0.424214	0.885412	0.20532	0.927783	0.288226	0.952639	-0.288668	0.942432
all-unigene000984	-9.42311	0.170474	#N/A	#N/A	-7.62643	0.770055	0.164981	0.900315
all-unigene000985	-8.21175	0.615021	-6.67935	0.86949	6.68271	0.857739	#N/A	#N/A
all-unigene000986	-7.43762	0.805707	#N/A	#N/A	#N/A	#N/A	#N/A	#N/A
all-unigene000987	-7.62922	0.739393	6.63708	0.872551	#N/A	#N/A	1.1574	0.880727
all-unigene000988	-7.31805	0.818378	#N/A	#N/A	#N/A	#N/A	-7.24854	0.860943
all-unigene000989	-7.62922	0.739393	-6.67935	0.86949	#N/A	#N/A	#N/A	#N/A
all-unigene000990	-0.759436	0.857267	-0.241345	0.908415	-8.55652	0.613703	#N/A	#N/A
all-unigene000991	-9.12276	0.281007	8.64759	0.529102	#N/A	#N/A	#N/A	#N/A
all-unigene000992	-8.21175	0.615021	6.63708	0.872551	#N/A	#N/A	#N/A	#N/A
all-unigene000993	-6.63649	0.838116	-6.67935	0.86949	#N/A	#N/A	#N/A	#N/A
all-unigene000994	-1.70126	0.360463	-2.27597	0.0573372	#N/A	#N/A	#N/A	#N/A
all-unigene000995	-0.949288	0.873048	#N/A	#N/A	-0.164249	0.913477	#N/A	#N/A
all-unigene000996	-10.6047	0.00655135	9.50028	0.195699	8.61714	0.582494	#N/A	#N/A
all-unigene000997	-2.26684	0.702331	-0.0422733	0.906099	#N/A	#N/A	#N/A	#N/A
all-unigene000998	-0.991441	0.818843	8.78605	0.534158	0.154504	0.912261	9.72846	0.104519
all-unigene000999	-0.949288	0.861743	8.21234	0.672433	#N/A	#N/A	#N/A	#N/A
all-unigene001000	-1.8643	0.599274	7.92711	0.782148	0.0422799	0.918466	-0.625612	0.893149
all-unigene001001	-9.79347	0.0742323	0.219936	0.910655	6.68271	0.857739	#N/A	#N/A
all-unigene001002	-10.4859	0.0107005	0.629159	0.893793	0.299242	0.909777	#N/A	#N/A
all-unigene001003	-10.0827	0.0403547	8.78605	0.521465	#N/A	#N/A	#N/A	#N/A
all-unigene001004	-1.27597	0.777607	0.49895	0.901891	-8.20896	0.718527	#N/A	#N/A
all-unigene001005	-7.62922	0.775849	#N/A	#N/A	#N/A	#N/A	7.73355	0.799924
all-unigene001006	-11.9312	7.2e-06	#N/A	#N/A	#N/A	#N/A	12.9937	3.6e-10
all-unigene001007	-0.952692	0.849529	1.94681	0.815917	-6.63371	0.861595	-6.57615	0.867478
all-unigene001008	-1.37822	0.74855	0.0899523	0.921231	-1.44664	0.840527	-0.239234	0.905109
all-unigene001009	-10.3235	0.0149103	-0.625087	0.897335	#N/A	#N/A	#N/A	#N/A
all-unigene001010	-1.68982	0.687103	-9.66698	0.106724	0.817564	0.893128	1.83067	0.737469
all-unigene001011	-1.95914	0.617072	7.83049	0.789655	#N/A	#N/A	#N/A	#N/A
all-unigene001012	#N/A	#N/A	#N/A	#N/A	#N/A	#N/A	6.82362	0.882721
all-unigene001013	-1.93154	0.599932	9.09763	0.390838	7.27251	0.856389	#N/A	#N/A
all-unigene001014	-0.370088	0.876644	-6.67935	0.889583	#N/A	#N/A	#N/A	#N/A
all-unigene001015	-8.94677	0.352475	0.692464	0.893116	-6.63371	0.861595	#N/A	#N/A
all-unigene001016	-0.784155	0.869371	-1.99084	0.889229	-0.299528	0.913167	1.83785	0.749527
all-unigene001017	#N/A	#N/A	#N/A	#N/A	#N/A	#N/A	#N/A	#N/A
all-unigene001018	-3.26537	0.284269	#N/A	#N/A	#N/A	#N/A	#N/A	#N/A
all-unigene001019	-7.62922	0.739393	-8.98997	0.372329	#N/A	#N/A	#N/A	#N/A
all-unigene001020	#N/A	#N/A	#N/A	#N/A	-1.11409	0.880961	#N/A	#N/A
all-unigene001021	#N/A	#N/A	#N/A	#N/A	#N/A	#N/A	#N/A	#N/A
all-unigene001022	-0.85704	0.851975	0.911773	0.881611	8.24383	0.703656	-8.0973	0.750888
all-unigene001023	-9.94531	0.0492269	-1.03522	0.890661	#N/A	#N/A	#N/A	#N/A
all-unigene001024	-0.200961	0.885744	9.38595	0.253509	1.11479	0.870997	1.29869	0.785575
all-unigene001025	-8.43345	0.605274	#N/A	#N/A	#N/A	#N/A	#N/A	#N/A
all-unigene001026	-1.37775	0.732316	-0.747813	0.887943	#N/A	#N/A	#N/A	#N/A
all-unigene001027	#N/A	#N/A	#N/A	#N/A	#N/A	#N/A	#N/A	#N/A
all-unigene001028	#N/A	#N/A	#N/A	#N/A	-6.63371	0.861595	-6.57615	0.867478
all-unigene001029	#N/A	#N/A	#N/A	#N/A	#N/A	#N/A	#N/A	#N/A
all-unigene001030	-0.370891	0.899498	0.296879	0.936046	-0.289237	0.950082	0.161266	0.944184
all-unigene001031	-1.27597	0.777809	-1.49976	0.756865	-0.533284	0.905405	-0.417446	0.903621
all-unigene001032	-0.125899	0.894576	-9.83671	0.0675197	#N/A	#N/A	#N/A	#N/A
all-unigene001033	#N/A	#N/A	#N/A	#N/A	#N/A	#N/A	-6.57615	0.867478
all-unigene001034	-7.62922	0.739393	#N/A	#N/A	#N/A	#N/A	#N/A	#N/A
all-unigene001035	#N/A	#N/A	#N/A	#N/A	#N/A	#N/A	#N/A	#N/A
all-unigene001036	-0.952692	0.853673	0.371267	0.905446	6.68271	0.892847	-6.57615	0.897045
all-unigene001037	-8.80466	0.469089	#N/A	#N/A	-0.156163	0.911728	#N/A	#N/A
all-unigene001038	-0.691286	0.862473	#N/A	#N/A	#N/A	#N/A	#N/A	#N/A
all-unigene001039	-7.56314	0.784889	#N/A	#N/A	7.61707	0.821106	#N/A	#N/A
all-unigene001040	0.626263	0.866841	#N/A	#N/A	#N/A	#N/A	#N/A	#N/A
all-unigene001041	-11.082	0.000874491	10.5804	0.00676151	-9.20652	0.323129	8.73016	0.530831
all-unigene001042	-3.26537	0.284269	6.63708	0.892218	-6.63371	0.895847	7.73355	0.799924
all-unigene001043	#N/A	#N/A	#N/A	#N/A	#N/A	#N/A	#N/A	#N/A
all-unigene001044	#N/A	#N/A	#N/A	#N/A	#N/A	#N/A	#N/A	#N/A
all-unigene001045	-9.94531	0.0623419	#N/A	#N/A	#N/A	#N/A	9.50485	0.178441
all-unigene001046	-2.52938	0.619556	0.693366	0.892361	1.04196	0.887478	-6.57615	0.867478
all-unigene001047	-1.39544	0.699377	1.62322	0.631626	0.339777	0.921338	0.921858	0.860479
all-unigene001048	#N/A	#N/A	#N/A	#N/A	#N/A	#N/A	#N/A	#N/A
all-unigene001049	-0.771355	0.85279	0.258605	0.928434	8.81911	0.497457	0.451785	0.904677
all-unigene001050	0.0434434	0.877692	-7.67229	0.778479	-7.62643	0.770055	#N/A	#N/A
all-unigene001051	-10.6228	0.00489922	#N/A	#N/A	#N/A	#N/A	10.4282	0.00720709
all-unigene001052	#N/A	#N/A	#N/A	#N/A	#N/A	#N/A	#N/A	#N/A
all-unigene001053	-0.00998562	0.886935	-1.35127	0.840933	-0.334559	0.907441	-0.735786	0.890896
all-unigene001054	-7.62922	0.775849	#N/A	#N/A	6.68271	0.892847	#N/A	#N/A
all-unigene001055	-8.21175	0.615021	-0.625087	0.897335	0.0489988	0.90286	-7.56857	0.786059
all-unigene001056	-1.09212	0.810307	1.27507	0.855927	#N/A	#N/A	#N/A	#N/A
all-unigene001057	-0.218757	0.883987	0.246563	0.919277	-0.587414	0.904143	-0.18197	0.922514
all-unigene001058	-3.40275	0.205431	-0.592365	0.89777	#N/A	#N/A	#N/A	#N/A
all-unigene001059	-8.5056	0.573213	#N/A	#N/A	#N/A	#N/A	6.74032	0.886924
all-unigene001060	-0.949288	0.861743	#N/A	#N/A	#N/A	#N/A	#N/A	#N/A
all-unigene001061	-6.63649	0.838116	-0.0422733	0.906099	#N/A	#N/A	#N/A	#N/A
all-unigene001062	0.0434434	0.877692	0.950461	0.893147	-6.63371	0.861595	#N/A	#N/A
all-unigene001063	-9.62375	0.134723	-7.82215	0.787868	-0.271831	0.908637	-1.13647	0.881483
all-unigene001064	-9.94531	0.0492269	-1.62436	0.756531	-0.534742	0.90362	-0.0406154	0.927163
all-unigene001065	-9.62375	0.111981	-0.527227	0.901722	#N/A	#N/A	#N/A	#N/A
all-unigene001066	-6.63649	0.838116	#N/A	#N/A	#N/A	#N/A	#N/A	#N/A
all-unigene001067	-7.84852	0.740787	#N/A	#N/A	1.04196	0.900774	#N/A	#N/A
all-unigene001068	-6.63649	0.838116	#N/A	#N/A	#N/A	#N/A	#N/A	#N/A
all-unigene001069	-10.2081	0.022019	-9.66698	0.106724	#N/A	#N/A	#N/A	#N/A
all-unigene001070	6.67993	0.859727	-0.0422733	0.914347	#N/A	#N/A	#N/A	#N/A
all-unigene001071	-8.62557	0.530547	#N/A	#N/A	#N/A	#N/A	#N/A	#N/A
all-unigene001072	-9.62375	0.111981	#N/A	#N/A	#N/A	#N/A	#N/A	#N/A
all-unigene001073	-2.45476	0.27077	0.132381	0.905738	#N/A	#N/A	-1.41068	0.864003
all-unigene001074	#N/A	#N/A	6.63708	0.892218	#N/A	#N/A	#N/A	#N/A
all-unigene001075	0.626263	0.87138	#N/A	#N/A	0.0492426	0.912007	1.1574	0.893361
all-unigene001076	#N/A	#N/A	#N/A	#N/A	#N/A	#N/A	#N/A	#N/A
all-unigene001077	-6.63649	0.838116	#N/A	#N/A	#N/A	#N/A	#N/A	#N/A
all-unigene001078	-10.4908	0.00814848	0.0393953	0.930621	-0.0300166	0.925271	0.644579	0.897426
all-unigene001079	#N/A	#N/A	#N/A	#N/A	#N/A	#N/A	#N/A	#N/A
all-unigene001080	-0.912949	0.874378	0.95387	0.887501	#N/A	#N/A	-7.56857	0.831471
all-unigene001081	0.760706	0.882935	-1.64583	0.706176	-0.864563	0.876468	-2.82254	0.526174
all-unigene001082	-1.68982	0.687103	-8.2549	0.655138	#N/A	#N/A	#N/A	#N/A
all-unigene001083	0.384983	0.944378	-0.296125	0.964091	0.19519	0.963712	0.237149	0.954248
all-unigene001084	-2.6506	0.306642	-7.67229	0.778479	8.67214	0.477826	-0.0970508	0.908819
all-unigene001085	-1.53182	0.835778	-7.67229	0.809849	-8.20896	0.718849	#N/A	#N/A
all-unigene001086	#N/A	#N/A	#N/A	#N/A	#N/A	#N/A	#N/A	#N/A
all-unigene001087	0.0342048	0.904205	0.693366	0.888811	-0.943718	0.903375	#N/A	#N/A
all-unigene001088	-0.0873897	0.912217	-0.365569	0.907058	-1.53643	0.676002	0.121893	0.918697
all-unigene001089	-8.21175	0.615021	#N/A	#N/A	7.16412	0.822543	-8.151	0.678321
all-unigene001090	-0.548808	0.885305	-10.0888	0.0374517	#N/A	#N/A	#N/A	#N/A
all-unigene001091	-1.43926	0.834997	-2.22343	0.782852	-6.63371	0.895701	#N/A	#N/A
all-unigene001092	0.457589	0.874161	#N/A	#N/A	6.68271	0.892847	#N/A	#N/A
all-unigene001093	-0.795567	0.848855	10.54	0.00759378	#N/A	#N/A	0.46037	0.902477
all-unigene001094	-8.21175	0.661444	8.21234	0.713628	6.68271	0.892847	-0.354943	0.902607
all-unigene001095	-3.11353	0.34763	0.371267	0.903908	#N/A	#N/A	#N/A	#N/A
all-unigene001096	-2.94381	0.435422	1.94681	0.815917	6.68271	0.857739	6.74032	0.854821
all-unigene001097	-8.21175	0.661444	6.63708	0.892218	#N/A	#N/A	6.74032	0.886924
all-unigene001098	-8.21175	0.615021	-0.0422733	0.906099	#N/A	#N/A	#N/A	#N/A
all-unigene001099	-1.53478	0.737667	-0.305172	0.908911	-0.856608	0.872794	-0.248513	0.902171
all-unigene001100	-10.3928	0.0116749	7.8053	0.760264	#N/A	#N/A	#N/A	#N/A
all-unigene001101	-2.1193	0.381525	-0.383505	0.918658	#N/A	#N/A	6.74032	0.887502
all-unigene001102	6.67993	0.863698	-8.2549	0.708119	-1.45151	0.698603	-0.257493	0.90968
all-unigene001103	-1.94564	0.786449	#N/A	#N/A	-8.81451	0.509995	1.1574	0.893636
all-unigene001104	-7.5855	0.781901	#N/A	#N/A	9.36233	0.238115	#N/A	#N/A
all-unigene001105	-1.49257	0.789806	8.94736	0.449687	6.68271	0.892847	-6.57615	0.897045
all-unigene001106	1.03639	0.85864	-1.03522	0.890661	-0.68569	0.893337	-0.0970508	0.908819
all-unigene001107	-1.61001	0.4709	-0.455705	0.930023	1.18544	0.782838	0.961992	0.84845
all-unigene001108	#N/A	#N/A	#N/A	#N/A	#N/A	#N/A	#N/A	#N/A
all-unigene001109	-6.63649	0.862996	#N/A	#N/A	#N/A	#N/A	#N/A	#N/A
all-unigene001110	-0.858219	0.910563	0.0343979	0.97527	-0.647179	0.896829	0.0402405	0.922715
all-unigene001111	-9.79347	0.0742323	7.62981	0.787488	#N/A	#N/A	#N/A	#N/A
all-unigene001112	-10.6228	0.00489922	#N/A	#N/A	#N/A	#N/A	9.05141	0.314145
all-unigene001113	-1.27597	0.780953	-0.0422733	0.906099	7.67567	0.758821	6.74032	0.854821
all-unigene001114	-8.94677	0.400684	#N/A	#N/A	-7.42661	0.844652	-0.831214	0.889725
all-unigene001115	-1.21754	0.782635	0.574612	0.905338	-1.10758	0.879203	1.75261	0.773744
all-unigene001116	-6.63649	0.838116	#N/A	#N/A	#N/A	#N/A	#N/A	#N/A
all-unigene001117	#N/A	#N/A	#N/A	#N/A	#N/A	#N/A	7.42226	0.83825
all-unigene001118	-6.63649	0.862996	#N/A	#N/A	#N/A	#N/A	#N/A	#N/A
all-unigene001119	#N/A	#N/A	#N/A	#N/A	#N/A	#N/A	-6.57615	0.867478
all-unigene001120	-1.89017	0.685069	-2.2016	0.788939	#N/A	#N/A	#N/A	#N/A
all-unigene001121	#N/A	#N/A	#N/A	#N/A	#N/A	#N/A	#N/A	#N/A
all-unigene001122	0.0434434	0.88827	-0.0422733	0.914347	-6.63371	0.895847	#N/A	#N/A
all-unigene001123	1.04735	0.843173	2.26844	0.745187	0.982708	0.873042	-1.52079	0.857309
all-unigene001124	0.0436595	0.876502	#N/A	#N/A	6.68271	0.857739	-8.151	0.678321
all-unigene001125	-9.79347	0.0742323	-0.777629	0.888691	#N/A	#N/A	8.73016	0.455271
all-unigene001126	#N/A	#N/A	-0.848424	0.881071	#N/A	#N/A	-9.45831	0.183838
all-unigene001127	-11.8094	1.47e-05	10.4835	0.00778795	#N/A	#N/A	#N/A	#N/A
all-unigene001128	#N/A	#N/A	#N/A	#N/A	#N/A	#N/A	#N/A	#N/A
all-unigene001129	-4.67935	0.909598	#N/A	#N/A	-9.56774	0.164241	#N/A	#N/A
all-unigene001130	-7.49388	0.793697	-7.52903	0.827529	#N/A	#N/A	#N/A	#N/A
all-unigene001131	0.248719	0.898866	-0.846058	0.875447	-0.949145	0.865821	-10.8097	0.00227704
all-unigene001132	#N/A	#N/A	#N/A	#N/A	#N/A	#N/A	#N/A	#N/A
all-unigene001133	-0.396951	0.876524	0.685701	0.894652	-0.595839	0.895975	-0.159554	0.911537
all-unigene001134	-0.954404	0.834981	-8.98997	0.419595	0.271671	0.91794	-0.082074	0.925168
all-unigene001135	-7.62922	0.739393	#N/A	#N/A	#N/A	#N/A	#N/A	#N/A
all-unigene001136	#N/A	#N/A	#N/A	#N/A	-0.943718	0.903443	1.07769	0.890415
all-unigene001137	0.617222	0.894005	-0.701911	0.908425	0.387567	0.942169	-0.0240355	0.956981
all-unigene001138	-10.3056	0.0196335	-10.4808	0.00864501	7.27251	0.856582	8.31626	0.676808
all-unigene001139	-1.93142	0.785273	-8.99859	0.415512	0.124536	0.911222	0.0636752	0.907471
all-unigene001140	-11.6501	4.78e-05	-10.0451	0.0455235	11.1559	0.000236502	10.2739	0.0181735
all-unigene001141	-13.2235	1.5e-09	11.4998	6.11e-05	-9.99487	0.0507295	#N/A	#N/A
all-unigene001142	1.67589	0.695243	0.765705	0.893995	6.68271	0.892847	6.74032	0.886924
all-unigene001143	-1.53182	0.825214	-6.67935	0.86949	#N/A	#N/A	#N/A	#N/A
all-unigene001144	#N/A	#N/A	6.70678	0.869032	6.27235	0.876852	#N/A	#N/A
all-unigene001145	-10.2081	0.022019	#N/A	#N/A	#N/A	#N/A	#N/A	#N/A
all-unigene001146	-6.63649	0.838116	#N/A	#N/A	#N/A	#N/A	#N/A	#N/A
all-unigene001147	#N/A	#N/A	#N/A	#N/A	#N/A	#N/A	#N/A	#N/A
all-unigene001148	-6.63649	0.862996	#N/A	#N/A	#N/A	#N/A	#N/A	#N/A
all-unigene001149	-0.762748	0.858871	0.0947172	0.923144	7.67567	0.758821	-6.57615	0.867478
all-unigene001150	1.29068	0.758955	-0.801882	0.881251	1.94388	0.245156	1.85774	0.202398
all-unigene001151	#N/A	#N/A	#N/A	#N/A	#N/A	#N/A	#N/A	#N/A
all-unigene001152	-0.949288	0.861743	-6.67935	0.86949	6.68271	0.857739	#N/A	#N/A
all-unigene001153	-3.25283	0.60681	#N/A	#N/A	#N/A	#N/A	#N/A	#N/A
all-unigene001154	-9.62375	0.111981	-6.67935	0.86949	#N/A	#N/A	-7.56857	0.786059
all-unigene001155	-1.27389	0.818576	-8.98997	0.372329	-0.533284	0.89885	-7.56857	0.786059
all-unigene001156	-9.62375	0.111981	-6.67935	0.86949	#N/A	#N/A	1.1574	0.880727
all-unigene001157	-0.807426	0.858428	-0.107246	0.907729	-1.8542	0.279554	0.275889	0.915599
all-unigene001158	-0.842107	0.846572	0.179419	0.911686	1.71594	0.752715	0.0917117	0.913796
all-unigene001159	#N/A	#N/A	#N/A	#N/A	#N/A	#N/A	#N/A	#N/A
all-unigene001160	2.27914	0.188452	0.576164	0.898065	#N/A	#N/A	#N/A	#N/A
all-unigene001161	-10.3758	0.0153818	1.88805	0.697208	0.427248	0.904695	-1.46378	0.850419
all-unigene001162	-8.80148	0.411464	-9.25493	0.25358	#N/A	#N/A	#N/A	#N/A
all-unigene001163	-1.14491	0.796235	0.844706	0.881748	8.25828	0.700131	-0.832701	0.876422
all-unigene001164	-1.14765	0.786466	-9.07116	0.335313	#N/A	#N/A	#N/A	#N/A
all-unigene001165	-6.63649	0.838116	#N/A	#N/A	#N/A	#N/A	#N/A	#N/A
all-unigene001166	#N/A	#N/A	#N/A	#N/A	#N/A	#N/A	#N/A	#N/A
all-unigene001167	-1.53182	0.825214	7.62981	0.787488	#N/A	#N/A	-6.57615	0.867478
all-unigene001168	-10.0827	0.0417949	7.61538	0.826863	7.16412	0.864937	-0.558737	0.896474
all-unigene001169	1.11603	0.770195	2.28432	0.340708	#N/A	#N/A	#N/A	#N/A
all-unigene001170	-9.79347	0.0742323	#N/A	#N/A	#N/A	#N/A	#N/A	#N/A
all-unigene001171	-8.21175	0.615021	-7.67229	0.778479	#N/A	#N/A	-0.835414	0.890646
all-unigene001172	-7.62922	0.739393	#N/A	#N/A	#N/A	#N/A	#N/A	#N/A
all-unigene001173	-1.94564	0.771721	-7.67229	0.778479	#N/A	#N/A	#N/A	#N/A
all-unigene001174	-9.79347	0.0742323	#N/A	#N/A	#N/A	#N/A	#N/A	#N/A
all-unigene001175	#N/A	#N/A	#N/A	#N/A	#N/A	#N/A	#N/A	#N/A
all-unigene001176	#N/A	#N/A	-6.67935	0.86949	#N/A	#N/A	#N/A	#N/A
all-unigene001177	-7.62922	0.739393	#N/A	#N/A	#N/A	#N/A	#N/A	#N/A
all-unigene001178	-0.952692	0.853673	6.63708	0.892218	#N/A	#N/A	#N/A	#N/A
all-unigene001179	-7.60023	0.743899	#N/A	#N/A	#N/A	#N/A	#N/A	#N/A
all-unigene001180	-1.12413	0.811813	1.05579	0.840552	-8.20896	0.647875	0.164164	0.900501
all-unigene001181	-0.539976	0.870161	-8.2549	0.697604	6.68271	0.892847	#N/A	#N/A
all-unigene001182	#N/A	#N/A	#N/A	#N/A	#N/A	#N/A	#N/A	#N/A
all-unigene001183	-8.31352	0.641424	#N/A	#N/A	#N/A	#N/A	#N/A	#N/A
all-unigene001184	-2.94561	0.451716	-9.77287	0.0971916	-7.62643	0.822722	1.1502	0.893657
all-unigene001185	#N/A	#N/A	-0.445071	0.902158	#N/A	#N/A	-6.57615	0.867478
all-unigene001186	-8.62557	0.479719	#N/A	#N/A	#N/A	#N/A	#N/A	#N/A
all-unigene001187	-6.63649	0.838116	#N/A	#N/A	#N/A	#N/A	#N/A	#N/A
all-unigene001188	-0.420073	0.876346	0.319471	0.910466	-8.20896	0.718849	#N/A	#N/A
all-unigene001189	-9.0735	0.35389	7.62262	0.826003	-0.143601	0.911275	4.54333	0.279719
all-unigene001190	-7.62922	0.775849	-6.67935	0.889583	#N/A	#N/A	#N/A	#N/A
all-unigene001191	0.364988	0.877024	-0.0424836	0.909891	#N/A	#N/A	#N/A	#N/A
all-unigene001192	-9.43136	0.167786	-0.305172	0.908911	#N/A	#N/A	#N/A	#N/A
all-unigene001193	0.0434434	0.88827	#N/A	#N/A	#N/A	#N/A	#N/A	#N/A
all-unigene001194	0.236207	0.889485	0.237258	0.928881	-0.534377	0.900823	0.650125	0.891386
all-unigene001195	-7.62922	0.775849	#N/A	#N/A	1.62457	0.867401	6.74032	0.886924
all-unigene001196	-0.19313	0.886972	#N/A	#N/A	#N/A	#N/A	#N/A	#N/A
all-unigene001197	-6.63649	0.866885	#N/A	#N/A	#N/A	#N/A	#N/A	#N/A
all-unigene001198	-1.27666	0.755701	-0.572678	0.904595	#N/A	#N/A	#N/A	#N/A
all-unigene001199	#N/A	#N/A	#N/A	#N/A	#N/A	#N/A	#N/A	#N/A
all-unigene001200	#N/A	#N/A	#N/A	#N/A	#N/A	#N/A	#N/A	#N/A
all-unigene001201	-7.62922	0.739393	6.63708	0.872551	-6.63371	0.861595	#N/A	#N/A
all-unigene001202	-7.62922	0.739393	-6.67935	0.86949	#N/A	#N/A	#N/A	#N/A
all-unigene001203	-2.26684	0.702331	-0.0422733	0.906099	#N/A	#N/A	#N/A	#N/A
all-unigene001204	-0.61072	0.873392	-10.4528	0.00788028	#N/A	#N/A	#N/A	#N/A
all-unigene001205	-3.52817	0.153849	3.21405	0.173542	#N/A	#N/A	6.74032	0.854821
all-unigene001206	-2.6506	0.306642	-7.67229	0.778479	0.463854	0.906828	-0.831214	0.884125
all-unigene001207	-1.68982	0.687103	1.27507	0.855927	1.62457	0.851888	1.16299	0.850325
all-unigene001208	0.0578387	0.948424	0.0547762	0.953781	-0.308235	0.948608	0.693632	0.91387
all-unigene001209	-6.18781	0.884951	#N/A	#N/A	#N/A	#N/A	#N/A	#N/A
all-unigene001210	1.14303	0.756123	-0.872402	0.864208	-0.0581523	0.921849	-0.310517	0.92939
all-unigene001211	-7.62922	0.739393	7.62981	0.787488	-1.52625	0.859236	-0.831214	0.884125
all-unigene001212	-1.65359	0.796186	2.46424	0.759123	-1.36456	0.809512	8.70475	0.539973
all-unigene001213	#N/A	#N/A	#N/A	#N/A	-0.947102	0.881861	7.73355	0.749395
all-unigene001214	-9.32682	0.203418	-0.270739	0.904015	#N/A	#N/A	#N/A	#N/A
all-unigene001215	-10.3843	0.0149235	#N/A	#N/A	9.53251	0.167486	#N/A	#N/A
all-unigene001216	-9.94531	0.0492269	-0.457071	0.906292	-0.172637	0.914698	-0.418299	0.90099
all-unigene001217	-2.65351	0.570943	-9.47459	0.166877	#N/A	#N/A	#N/A	#N/A
all-unigene001218	-9.62375	0.111981	#N/A	#N/A	#N/A	#N/A	#N/A	#N/A
all-unigene001219	-0.31829	0.883341	-1.84478	0.75775	-8.20896	0.718527	8.31626	0.678103
all-unigene001220	-2.75143	0.52834	-0.0424836	0.905307	-0.213156	0.911646	0.749995	0.884336
all-unigene001221	-0.277739	0.892173	-0.430783	0.914615	#N/A	#N/A	#N/A	#N/A
all-unigene001222	-2.94381	0.45601	-0.505203	0.905593	-6.63371	0.895701	-6.57615	0.897576
all-unigene001223	0.0434434	0.88827	-6.67935	0.889583	#N/A	#N/A	#N/A	#N/A
all-unigene001224	-7.62922	0.775849	-6.67935	0.889583	-0.943718	0.903443	#N/A	#N/A
all-unigene001225	6.67993	0.859727	#N/A	#N/A	#N/A	#N/A	#N/A	#N/A
all-unigene001226	-1.27389	0.818576	-8.2549	0.655138	-6.63371	0.861595	-6.57615	0.867478
all-unigene001227	-3.06136	0.374804	#N/A	#N/A	-1.36085	0.808208	0.580558	0.895471
all-unigene001228	-9.62375	0.111981	#N/A	#N/A	#N/A	#N/A	#N/A	#N/A
all-unigene001229	#N/A	#N/A	-6.1708	0.91148	#N/A	#N/A	-5.31144	0.925574
all-unigene001230	-0.992453	0.838528	-0.250522	0.912143	-9.48308	0.14913	1.1776	0.84933
all-unigene001231	-9.43136	0.167786	7.62981	0.787488	-0.943718	0.890482	-6.57615	0.867478
all-unigene001232	-9.43136	0.167786	-1.66757	0.835224	#N/A	#N/A	#N/A	#N/A
all-unigene001233	-1.96	0.782915	#N/A	#N/A	#N/A	#N/A	#N/A	#N/A
all-unigene001234	#N/A	#N/A	8.65113	0.527712	#N/A	#N/A	#N/A	#N/A
all-unigene001235	-0.995263	0.828228	-1.14141	0.882331	7.73199	0.805671	#N/A	#N/A
all-unigene001236	#N/A	#N/A	2.24889	0.578824	0.631851	0.896179	-0.31908	0.905948
all-unigene001237	-9.79347	0.0742323	7.62981	0.787488	#N/A	#N/A	#N/A	#N/A
all-unigene001238	-1.41334	0.744447	-2.54116	0.23146	#N/A	#N/A	#N/A	#N/A
all-unigene001239	-0.0810767	0.886829	#N/A	#N/A	10.8639	0.000820216	-1.81962	0.482569
all-unigene001240	-9.62375	0.111981	-0.625087	0.897335	#N/A	#N/A	#N/A	#N/A
all-unigene001241	-1.94564	0.771721	1.41452	0.783552	1.85155	0.741853	0.747682	0.888692
all-unigene001242	-2.41784	0.484733	-0.302073	0.907738	3.08942	0.570677	-0.119641	0.913078
all-unigene001243	#N/A	#N/A	#N/A	#N/A	#N/A	#N/A	#N/A	#N/A
all-unigene001244	0.0728402	0.881184	7.86139	0.750369	8.57157	0.518283	8.31626	0.609534
all-unigene001245	#N/A	#N/A	#N/A	#N/A	#N/A	#N/A	-7.56857	0.831471
all-unigene001246	#N/A	#N/A	#N/A	#N/A	#N/A	#N/A	#N/A	#N/A
all-unigene001247	-9.43136	0.167786	-0.0425895	0.908997	#N/A	#N/A	6.74032	0.854821
all-unigene001248	6.67993	0.834342	6.63708	0.872551	-1.07402	0.885837	#N/A	#N/A
all-unigene001249	-9.68026	0.0982094	#N/A	#N/A	9.8385	0.0547281	#N/A	#N/A
all-unigene001250	-0.31829	0.888071	#N/A	#N/A	#N/A	#N/A	#N/A	#N/A
all-unigene001251	-8.21175	0.615021	#N/A	#N/A	#N/A	#N/A	0.164164	0.900501
all-unigene001252	-0.445288	0.890886	8.62616	0.53744	#N/A	#N/A	#N/A	#N/A
all-unigene001253	-11.5649	5.82e-05	6.40517	0.882663	-10.1263	0.0233218	#N/A	#N/A
all-unigene001254	-1.09572	0.808652	-1.1826	0.859964	#N/A	#N/A	0.0827512	0.907747
all-unigene001255	-2.28578	0.269609	-9.79281	0.0764398	-0.360523	0.951938	-1.18101	0.775318
all-unigene001256	-10.2081	0.022019	8.91828	0.414564	9.65771	0.0914161	8.73016	0.455271
all-unigene001257	-9.79347	0.0742323	-1.03522	0.890661	#N/A	#N/A	#N/A	#N/A
all-unigene001258	-2.01482	0.420666	-1.1024	0.846673	-0.161149	0.909448	-0.898968	0.871938
all-unigene001259	-3.11353	0.34763	-2.03168	0.80461	0.631851	0.896179	-1.41491	0.830391
all-unigene001260	-1.95086	0.663838	-1.84478	0.75063	#N/A	#N/A	#N/A	#N/A
all-unigene001261	-2.27545	0.714537	#N/A	#N/A	-7.61201	0.824484	1.74542	0.783198
all-unigene001262	-2.12331	0.384174	0.163608	0.923471	8.99336	0.337098	#N/A	#N/A
all-unigene001263	#N/A	#N/A	#N/A	#N/A	#N/A	#N/A	#N/A	#N/A
all-unigene001264	-9.97949	0.0446321	-9.99861	0.0413003	-10.7746	0.00152221	#N/A	#N/A
all-unigene001265	-1.33115	0.75614	-0.530578	0.915081	2.06519	0.276991	0.0454932	0.933234
all-unigene001266	-1.52433	0.745689	-0.485545	0.900795	0.671178	0.894124	-7.85996	0.740548
all-unigene001267	0.066713	0.898768	1.1556	0.770222	#N/A	#N/A	#N/A	#N/A
all-unigene001268	-9.62375	0.111981	#N/A	#N/A	#N/A	#N/A	#N/A	#N/A
all-unigene001269	-2.02437	0.384738	-0.0426533	0.922565	-7.2422	0.817171	6.74032	0.854821
all-unigene001270	-2.12059	0.594723	8.21234	0.672433	-6.63371	0.861595	6.74032	0.854821
all-unigene001271	-3.17006	0.336861	1.45455	0.869219	1.04196	0.900704	-6.92899	0.881572
all-unigene001272	-0.766867	0.852859	1.14829	0.81703	0.0541996	0.912643	-0.238167	0.910267
all-unigene001273	-9.94531	0.0492269	8.21234	0.672433	-8.87617	0.400591	#N/A	#N/A
all-unigene001274	-9.01153	0.325988	-0.699809	0.894907	-8.22327	0.643837	#N/A	#N/A
all-unigene001275	-0.277429	0.879329	2.08071	0.785692	-0.327269	0.91269	0.253116	0.920102
all-unigene001276	-9.0415	0.367891	#N/A	#N/A	-7.41834	0.845247	#N/A	#N/A
all-unigene001277	-0.958626	0.841636	1.54255	0.861749	1.61012	0.853226	-0.418299	0.90099
all-unigene001278	-9.79347	0.0742323	-1.57402	0.860238	#N/A	#N/A	#N/A	#N/A
all-unigene001279	-1.84236	0.559731	1.00427	0.881349	-6.63371	0.861595	6.74032	0.854821
all-unigene001280	1.02919	0.870484	-1.03522	0.900594	-0.12067	0.911504	0.178511	0.913714
all-unigene001281	#N/A	#N/A	#N/A	#N/A	#N/A	#N/A	#N/A	#N/A
all-unigene001282	-9.91913	0.052991	#N/A	#N/A	6.68271	0.857739	#N/A	#N/A
all-unigene001283	#N/A	#N/A	#N/A	#N/A	#N/A	#N/A	#N/A	#N/A
all-unigene001284	-9.62375	0.111981	8.94736	0.401505	#N/A	#N/A	#N/A	#N/A
all-unigene001285	0.148063	0.881074	8.50227	0.641349	0.468017	0.903841	1.20169	0.868315
all-unigene001286	-8.94677	0.352475	-6.91599	0.855626	#N/A	#N/A	#N/A	#N/A
all-unigene001287	-8.62557	0.530547	0.950461	0.900755	-6.63371	0.895847	6.74032	0.886924
all-unigene001288	-1.53644	0.777093	-6.67935	0.86949	#N/A	#N/A	-6.57615	0.867478
all-unigene001289	-10.2081	0.022019	-10.2501	0.017346	-8.49889	0.55466	#N/A	#N/A
all-unigene001290	-1.75848	0.725246	-1.03894	0.877613	-1.52625	0.859236	-6.57615	0.867478
all-unigene001291	-0.612019	0.867654	#N/A	#N/A	-8.20896	0.718527	#N/A	#N/A
all-unigene001292	#N/A	#N/A	#N/A	#N/A	#N/A	#N/A	#N/A	#N/A
all-unigene001293	-8.21175	0.615021	#N/A	#N/A	#N/A	#N/A	#N/A	#N/A
all-unigene001294	-2.12059	0.594723	#N/A	#N/A	#N/A	#N/A	#N/A	#N/A
all-unigene001295	1.03639	0.85864	-6.67935	0.86949	-0.533284	0.89885	-0.828256	0.890841
all-unigene001296	-8.62557	0.530547	-6.67935	0.889583	#N/A	#N/A	#N/A	#N/A
all-unigene001297	-0.949288	0.861743	-6.67935	0.86949	1.04196	0.887478	1.1574	0.880727
all-unigene001298	1.4398	0.796172	-2.03168	0.80461	0.631851	0.896179	0.747682	0.888692
all-unigene001299	-6.63649	0.838116	6.63708	0.872551	-6.63371	0.861595	-6.57615	0.867478
all-unigene001300	-9.62375	0.111981	#N/A	#N/A	#N/A	#N/A	#N/A	#N/A
all-unigene001301	-0.575819	0.909156	-11.7949	5.6e-06	#N/A	#N/A	#N/A	#N/A
all-unigene001302	-1.25828	0.780411	#N/A	#N/A	-7.97535	0.76933	#N/A	#N/A
all-unigene001303	-1.65535	0.520774	2.72788	0.0212072	-1.11948	0.802138	2.53294	0.0595815
all-unigene001304	-9.98651	0.0554923	#N/A	#N/A	-0.335664	0.907345	#N/A	#N/A
all-unigene001305	-7.62922	0.781665	7.62981	0.825139	1.62457	0.867317	0.579161	0.896849
all-unigene001306	1.36134	0.808134	7.62981	0.787488	0.631851	0.896179	#N/A	#N/A
all-unigene001307	-6.63649	0.862996	#N/A	#N/A	0.0489988	0.916893	8.31626	0.676808
all-unigene001308	-1.54733	0.699366	-10.6287	0.00459595	-8.20896	0.718849	-8.58264	0.617614
all-unigene001309	-6.63649	0.838116	#N/A	#N/A	-0.943718	0.890482	-6.57615	0.867478
all-unigene001310	-1.01424	0.809436	0.675457	0.89364	-0.0709391	0.922101	1.02996	0.827902
all-unigene001311	-9.43136	0.167786	#N/A	#N/A	#N/A	#N/A	#N/A	#N/A
all-unigene001312	-2.05896	0.229648	-0.0858801	0.936649	#N/A	#N/A	#N/A	#N/A
all-unigene001313	-0.339946	0.889055	-0.490105	0.90728	-0.292186	0.91938	-1.25699	0.802159
all-unigene001314	-9.94531	0.0492269	#N/A	#N/A	#N/A	#N/A	#N/A	#N/A
all-unigene001315	0.0434434	0.877692	6.63708	0.872551	-1.52625	0.859236	2.95991	0.485045
all-unigene001316	-8.32243	0.582825	#N/A	#N/A	7.58686	0.772601	1.26076	0.864066
all-unigene001317	-1.68982	0.687103	6.63708	0.872551	#N/A	#N/A	-6.57615	0.867478
all-unigene001318	-9.99489	0.0523377	9.60256	0.157067	#N/A	#N/A	8.38643	0.655736
all-unigene001319	#N/A	#N/A	8.21234	0.713628	-8.20896	0.718849	0.164164	0.913436
all-unigene001320	-0.76202	0.856873	-7.67229	0.778479	-1.94006	0.811108	-7.56857	0.786059
all-unigene001321	-9.86073	0.0758318	-8.59494	0.589454	-8.75339	0.536879	-1.73512	0.756531
all-unigene001322	-7.62922	0.781665	#N/A	#N/A	#N/A	#N/A	#N/A	#N/A
all-unigene001323	#N/A	#N/A	#N/A	#N/A	#N/A	#N/A	#N/A	#N/A
all-unigene001324	-2.0041	0.337459	9.88556	0.0629676	-0.113912	0.926348	0.996399	0.852915
all-unigene001325	-2.7941	0.345879	-0.89715	0.892122	-7.70098	0.558372	7.46612	0.834464
all-unigene001326	-1.94564	0.771721	-1.61782	0.856452	#N/A	#N/A	#N/A	#N/A
all-unigene001327	-6.63649	0.838116	0.950461	0.893147	-0.943718	0.890482	0.122558	0.900582
all-unigene001328	-6.63649	0.866885	-6.67935	0.894328	#N/A	#N/A	#N/A	#N/A
all-unigene001329	8.25549	0.596488	6.63708	0.872551	-6.63371	0.861595	-6.57615	0.867478
all-unigene001330	-0.933305	0.8346	-0.733896	0.888988	0.199054	0.927646	-0.0406154	0.927163
all-unigene001331	-1.72207	0.688556	-8.69725	0.500691	#N/A	#N/A	#N/A	#N/A
all-unigene001332	-6.63649	0.838116	-6.67935	0.86949	#N/A	#N/A	#N/A	#N/A
all-unigene001333	0.778808	0.857103	0.540049	0.899568	#N/A	#N/A	#N/A	#N/A
all-unigene001334	6.67993	0.859727	#N/A	#N/A	#N/A	#N/A	#N/A	#N/A
all-unigene001335	-6.79844	0.85409	#N/A	#N/A	#N/A	#N/A	#N/A	#N/A
all-unigene001336	-1.17588	0.814414	-8.66875	0.512306	#N/A	#N/A	#N/A	#N/A
all-unigene001337	-1.36826	0.779272	0.540049	0.903325	2.03843	0.816543	0.747682	0.895105
all-unigene001338	-7.62922	0.739393	-0.0422733	0.906099	-6.63371	0.861595	#N/A	#N/A
all-unigene001339	-0.953833	0.84301	2.43321	0.616087	0.181196	0.911375	0.451198	0.900616
all-unigene001340	-1.12413	0.811813	2.94499	0.482403	#N/A	#N/A	#N/A	#N/A
all-unigene001341	-2.46353	0.312191	1.5639	0.795596	8.60964	0.503257	7.73355	0.749395
all-unigene001342	-1.63227	0.629081	-0.852781	0.87524	#N/A	#N/A	#N/A	#N/A
all-unigene001343	-11.7516	2.59e-05	#N/A	#N/A	#N/A	#N/A	6.74032	0.886924
all-unigene001344	-10.3011	0.0206724	#N/A	#N/A	#N/A	#N/A	#N/A	#N/A
all-unigene001345	-2.26684	0.702331	0.95387	0.882654	-0.948236	0.875458	-1.41068	0.864003
all-unigene001346	-6.63649	0.866885	#N/A	#N/A	#N/A	#N/A	#N/A	#N/A
all-unigene001347	8.25549	0.596488	#N/A	#N/A	#N/A	#N/A	#N/A	#N/A
all-unigene001348	-9.20932	0.247054	#N/A	#N/A	#N/A	#N/A	6.74032	0.854821
all-unigene001349	-9.69748	0.117602	#N/A	#N/A	10.1732	0.0248011	2.37344	0.877516
all-unigene001350	7.67288	0.766493	#N/A	#N/A	#N/A	#N/A	#N/A	#N/A
all-unigene001351	-10.3235	0.0149103	-0.938425	0.876206	#N/A	#N/A	#N/A	#N/A
all-unigene001352	-0.752398	0.861172	0.412895	0.905668	-1.0617	0.876681	-8.88305	0.500811
all-unigene001353	-2.12059	0.594723	-0.719618	0.890244	#N/A	#N/A	#N/A	#N/A
all-unigene001354	-3.12256	0.126197	0.514581	0.900784	#N/A	#N/A	#N/A	#N/A
all-unigene001355	-1.19021	0.812199	#N/A	#N/A	#N/A	#N/A	#N/A	#N/A
all-unigene001356	#N/A	#N/A	#N/A	#N/A	#N/A	#N/A	#N/A	#N/A
all-unigene001357	-8.94677	0.400684	#N/A	#N/A	#N/A	#N/A	#N/A	#N/A
all-unigene001358	-1.89658	0.194234	-0.465762	0.97593	#N/A	#N/A	#N/A	#N/A
all-unigene001359	-0.538872	0.869615	-0.236935	0.904424	#N/A	#N/A	#N/A	#N/A
all-unigene001360	-11.5119	7.75e-05	-8.10873	0.693743	#N/A	#N/A	1.27677	0.848171
all-unigene001361	-9.14802	0.270973	#N/A	#N/A	#N/A	#N/A	#N/A	#N/A
all-unigene001362	-2.16118	0.200592	10.4309	0.00962127	1.11751	0.813023	-2.44067	0.760841
all-unigene001363	-0.539976	0.871231	-8.2549	0.655138	#N/A	#N/A	#N/A	#N/A
all-unigene001364	#N/A	#N/A	#N/A	#N/A	-2.52381	0.662475	0.165393	0.904526
all-unigene001365	-8.21175	0.615021	#N/A	#N/A	#N/A	#N/A	#N/A	#N/A
all-unigene001366	-8.94677	0.400684	-7.67229	0.809849	0.0489988	0.916893	-0.417446	0.903621
all-unigene001367	-6.63649	0.866885	#N/A	#N/A	#N/A	#N/A	#N/A	#N/A
all-unigene001368	-8.22606	0.657679	6.63708	0.892218	-7.90017	0.782801	-7.58285	0.829063
all-unigene001369	-8.21175	0.615021	6.63708	0.872551	#N/A	#N/A	#N/A	#N/A
all-unigene001370	-2.20693	0.288847	-1.99741	0.501951	0.0492426	0.904105	#N/A	#N/A
all-unigene001371	-6.63649	0.838116	-0.0422733	0.906099	#N/A	#N/A	#N/A	#N/A
all-unigene001372	0.380734	0.912392	-1.14166	0.793209	0.0489988	0.90286	8.31626	0.609534
all-unigene001373	-8.62557	0.479719	0.0877844	0.906435	7.38215	0.79966	-9.1046	0.328744
all-unigene001374	-8.21175	0.615021	-1.03894	0.877613	#N/A	#N/A	#N/A	#N/A
all-unigene001375	-6.63649	0.838116	#N/A	#N/A	#N/A	#N/A	#N/A	#N/A
all-unigene001376	0.0434434	0.88827	#N/A	#N/A	6.76598	0.88901	0.164164	0.913436
all-unigene001377	-0.62212	0.865026	-8.34771	0.682764	#N/A	#N/A	9.1569	0.332535
all-unigene001378	#N/A	#N/A	-6.67935	0.86949	#N/A	#N/A	#N/A	#N/A
all-unigene001379	-2.26684	0.702331	7.62981	0.787488	0.0489988	0.90286	#N/A	#N/A
all-unigene001380	-6.63649	0.838116	#N/A	#N/A	-6.63371	0.861595	-6.57615	0.867478
all-unigene001381	-8.21175	0.615021	0.133001	0.905135	8.51653	0.539341	1.7401	0.839449
all-unigene001382	#N/A	#N/A	#N/A	#N/A	#N/A	#N/A	#N/A	#N/A
all-unigene001383	-7.62922	0.739393	-0.0422733	0.906099	#N/A	#N/A	#N/A	#N/A
all-unigene001384	-0.400224	0.882017	#N/A	#N/A	#N/A	#N/A	#N/A	#N/A
all-unigene001385	-10.8706	0.00174835	#N/A	#N/A	#N/A	#N/A	12.2816	1.29e-07
all-unigene001386	-8.94677	0.352475	#N/A	#N/A	#N/A	#N/A	9.8982	0.0481101
all-unigene001387	-10.2081	0.0271912	#N/A	#N/A	#N/A	#N/A	#N/A	#N/A
all-unigene001388	0.0434434	0.88827	#N/A	#N/A	6.68271	0.892847	0.164164	0.913436
all-unigene001389	-8.62557	0.530547	#N/A	#N/A	7.2144	0.86129	#N/A	#N/A
all-unigene001390	-6.63649	0.838116	#N/A	#N/A	-1.17028	0.850265	1.16159	0.863807
all-unigene001391	-7.62922	0.739393	#N/A	#N/A	#N/A	#N/A	#N/A	#N/A
all-unigene001392	-1.53644	0.781629	-0.52512	0.901606	-6.63371	0.895847	-6.57615	0.897045
all-unigene001393	#N/A	#N/A	#N/A	#N/A	#N/A	#N/A	#N/A	#N/A
all-unigene001394	-1.29569	0.735011	-0.12283	0.921409	0.815763	0.889118	#N/A	#N/A
all-unigene001395	0.261524	0.930368	-0.705002	0.904036	1.05091	0.7831	0.725326	0.899785
all-unigene001396	#N/A	#N/A	#N/A	#N/A	#N/A	#N/A	#N/A	#N/A
all-unigene001397	#N/A	#N/A	-11.0955	0.000499558	#N/A	#N/A	-9.30309	0.304663
all-unigene001398	-8.84229	0.444896	8.89159	0.475183	#N/A	#N/A	#N/A	#N/A
all-unigene001399	-7.62922	0.739393	#N/A	#N/A	-7.62643	0.770055	-6.57615	0.867478
all-unigene001400	-7.98937	0.720415	#N/A	#N/A	-6.91797	0.882127	-2.92772	0.938558
all-unigene001401	-11.4421	0.000146638	-0.965943	0.854647	-10.1148	0.0339416	-9.67875	0.148838
all-unigene001402	0.159227	0.904408	-2.03717	0.684122	-0.660531	0.899489	0.650125	0.891386
all-unigene001403	-6.63649	0.838116	#N/A	#N/A	#N/A	#N/A	#N/A	#N/A
all-unigene001404	0.0430174	0.882952	-6.67935	0.86949	#N/A	#N/A	#N/A	#N/A
all-unigene001405	-7.62922	0.739393	6.63708	0.872551	#N/A	#N/A	#N/A	#N/A
all-unigene001406	-7.62922	0.739393	-8.98997	0.372329	-7.62643	0.770055	#N/A	#N/A
all-unigene001407	-2.53522	0.373387	-0.404754	0.910176	#N/A	#N/A	#N/A	#N/A
all-unigene001408	#N/A	#N/A	6.63708	0.89686	#N/A	#N/A	#N/A	#N/A
all-unigene001409	-6.63649	0.838116	#N/A	#N/A	#N/A	#N/A	#N/A	#N/A
all-unigene001410	-8.21175	0.669056	-0.0425895	0.909992	-0.943718	0.903375	8.73016	0.530831
all-unigene001411	-2.75143	0.545616	-0.0422733	0.914347	-6.63371	0.895847	#N/A	#N/A
all-unigene001412	-9.94531	0.0492269	#N/A	#N/A	#N/A	#N/A	6.74032	0.854821
all-unigene001413	0.465435	0.88469	-0.700511	0.892189	#N/A	#N/A	#N/A	#N/A
all-unigene001414	#N/A	#N/A	#N/A	#N/A	#N/A	#N/A	-7.56857	0.786059
all-unigene001415	-7.62922	0.739393	#N/A	#N/A	#N/A	#N/A	#N/A	#N/A
all-unigene001416	-0.108011	0.897629	-0.0426351	0.916062	-7.62643	0.770055	#N/A	#N/A
all-unigene001417	1.06014	0.861941	0.248144	0.950165	2.31483	0.0184228	1.14092	0.783838
all-unigene001418	-10.2081	0.022019	#N/A	#N/A	#N/A	#N/A	#N/A	#N/A
all-unigene001419	-7.72636	0.723288	#N/A	#N/A	-6.63371	0.861595	#N/A	#N/A
all-unigene001420	-0.202617	0.880364	#N/A	#N/A	#N/A	#N/A	#N/A	#N/A
all-unigene001421	0.405935	0.88439	#N/A	#N/A	#N/A	#N/A	-8.2257	0.659075
all-unigene001422	-1.19909	0.849946	-7.67229	0.778479	-0.533284	0.89885	-0.119988	0.900402
all-unigene001423	12.0924	2.01e-06	0.661041	0.919507	#N/A	#N/A	#N/A	#N/A
all-unigene001424	-3.64355	0.121606	0.695341	0.894135	-0.824172	0.874023	0.261329	0.909868
all-unigene001425	-8.48987	0.528466	#N/A	#N/A	6.68271	0.857739	-8.151	0.678321
all-unigene001426	-7.62922	0.775849	#N/A	#N/A	0.0489988	0.916893	#N/A	#N/A
all-unigene001427	-0.370088	0.875155	-6.67935	0.86949	8.67214	0.477826	#N/A	#N/A
all-unigene001428	-7.19738	0.824838	#N/A	#N/A	#N/A	#N/A	#N/A	#N/A
all-unigene001429	-1.27389	0.818576	-7.67229	0.778479	#N/A	#N/A	#N/A	#N/A
all-unigene001430	#N/A	#N/A	#N/A	#N/A	#N/A	#N/A	#N/A	#N/A
all-unigene001431	#N/A	#N/A	#N/A	#N/A	#N/A	#N/A	#N/A	#N/A
all-unigene001432	-1.0743	0.784178	-1.16299	0.767495	-0.185263	0.920098	0.979113	0.838737
all-unigene001433	-2.40753	0.611149	-0.044249	0.917323	0.220756	0.913622	-1.56815	0.762185
all-unigene001434	-7.62922	0.739393	#N/A	#N/A	#N/A	#N/A	#N/A	#N/A
all-unigene001435	-10.4272	0.0103071	#N/A	#N/A	#N/A	#N/A	#N/A	#N/A
all-unigene001436	-9.59464	0.119548	1.23522	0.856772	-0.192388	0.924975	-0.987175	0.869468
all-unigene001437	-8.55932	0.504009	-9.58356	0.130771	#N/A	#N/A	#N/A	#N/A
all-unigene001438	-9.43136	0.167786	-3.0299	0.443403	0.855204	0.880324	0.16557	0.911824
all-unigene001439	-9.94531	0.0492269	-8.2549	0.655138	-0.22801	0.917854	9.47725	0.146095
all-unigene001440	-7.89104	0.739568	#N/A	#N/A	#N/A	#N/A	#N/A	#N/A
all-unigene001441	-7.62922	0.739393	#N/A	#N/A	#N/A	#N/A	#N/A	#N/A
all-unigene001442	-9.81414	0.0884686	#N/A	#N/A	#N/A	#N/A	-0.143348	0.905993
all-unigene001443	#N/A	#N/A	#N/A	#N/A	0.631851	0.896179	-6.57615	0.867478
all-unigene001444	-9.20932	0.247054	#N/A	#N/A	#N/A	#N/A	#N/A	#N/A
all-unigene001445	-2.27243	0.520835	-0.777629	0.888691	#N/A	#N/A	#N/A	#N/A
all-unigene001446	0.320366	0.947707	0.801607	0.926006	-0.17254	0.951588	0.813549	0.885212
all-unigene001447	-0.848305	0.846746	-0.719618	0.890244	-6.63371	0.861595	#N/A	#N/A
all-unigene001448	#N/A	#N/A	#N/A	#N/A	#N/A	#N/A	#N/A	#N/A
all-unigene001449	-0.59302	0.878227	0.955584	0.870073	-8.09429	0.678235	0.0978555	0.902113
all-unigene001450	6.67993	0.859727	-6.67935	0.889583	#N/A	#N/A	#N/A	#N/A
all-unigene001451	#N/A	#N/A	#N/A	#N/A	#N/A	#N/A	#N/A	#N/A
all-unigene001452	-0.346732	0.899165	-2.04067	0.694783	-0.500373	0.902179	-0.526522	0.900289
all-unigene001453	#N/A	#N/A	6.79902	0.884821	6.95528	0.878928	-6.98382	0.877897
all-unigene001454	#N/A	#N/A	#N/A	#N/A	#N/A	#N/A	#N/A	#N/A
all-unigene001455	-7.62922	0.739393	6.63708	0.872551	-6.63371	0.861595	#N/A	#N/A
all-unigene001456	-7.62922	0.739393	#N/A	#N/A	#N/A	#N/A	#N/A	#N/A
all-unigene001457	-6.63649	0.838116	#N/A	#N/A	#N/A	#N/A	#N/A	#N/A
all-unigene001458	-7.19738	0.829629	#N/A	#N/A	-5.80858	0.919	#N/A	#N/A
all-unigene001459	-9.18999	0.303206	7.40504	0.848948	-7.22335	0.862114	#N/A	#N/A
all-unigene001460	-1.53182	0.825214	6.63708	0.872551	#N/A	#N/A	#N/A	#N/A
all-unigene001461	-10.0827	0.032802	#N/A	#N/A	#N/A	#N/A	3.7367	0.0988352
all-unigene001462	-1.75848	0.725246	0.541155	0.900083	-8.94397	0.370413	0.900409	0.876527
all-unigene001463	#N/A	#N/A	#N/A	#N/A	#N/A	#N/A	#N/A	#N/A
all-unigene001464	2.03835	0.634798	-7.67229	0.778479	0.0489988	0.90286	6.74032	0.854821
all-unigene001465	-9.79347	0.0742323	#N/A	#N/A	#N/A	#N/A	#N/A	#N/A
all-unigene001466	-1.45178	0.762527	#N/A	#N/A	-7.58271	0.827746	0.649024	0.901933
all-unigene001467	-8.21175	0.615021	#N/A	#N/A	#N/A	#N/A	4.6645	0.910108
all-unigene001468	#N/A	#N/A	#N/A	#N/A	#N/A	#N/A	#N/A	#N/A
all-unigene001469	-9.94531	0.0492269	8.21234	0.672433	1.63197	0.698378	-1.20864	0.80426
all-unigene001470	-2.17202	0.650949	-0.998879	0.853071	#N/A	#N/A	#N/A	#N/A
all-unigene001471	1.03639	0.868391	#N/A	#N/A	#N/A	#N/A	#N/A	#N/A
all-unigene001472	-2.12059	0.600415	-1.61782	0.865467	-6.63371	0.895847	-6.57615	0.897045
all-unigene001473	-6.63649	0.862996	1.52819	0.871557	0.0636331	0.917101	-6.57615	0.897045
all-unigene001474	8.99056	0.371902	#N/A	#N/A	#N/A	#N/A	#N/A	#N/A
all-unigene001475	#N/A	#N/A	#N/A	#N/A	#N/A	#N/A	#N/A	#N/A
all-unigene001476	-2.27243	0.520835	-1.21054	0.833486	#N/A	#N/A	#N/A	#N/A
all-unigene001477	-0.888414	0.842306	-0.283467	0.921849	#N/A	#N/A	#N/A	#N/A
all-unigene001478	-0.539976	0.871231	-1.03894	0.877613	#N/A	#N/A	#N/A	#N/A
all-unigene001479	6.67993	0.859727	#N/A	#N/A	#N/A	#N/A	#N/A	#N/A
all-unigene001480	-0.953833	0.842661	-0.487802	0.902137	0.314835	0.908146	1.7401	0.854462
all-unigene001481	-11.5733	5.56e-05	#N/A	#N/A	#N/A	#N/A	#N/A	#N/A
all-unigene001482	-1.40925	0.805357	-1.40811	0.836696	6.68271	0.857739	#N/A	#N/A
all-unigene001483	0.0434434	0.88827	-7.67229	0.809849	#N/A	#N/A	#N/A	#N/A
all-unigene001484	-8.21175	0.615021	#N/A	#N/A	#N/A	#N/A	#N/A	#N/A
all-unigene001485	#N/A	#N/A	-8.49702	0.577654	-0.943718	0.890482	#N/A	#N/A
all-unigene001486	-0.982245	0.835767	8.47056	0.594092	#N/A	#N/A	#N/A	#N/A
all-unigene001487	-0.277739	0.892173	1.36944	0.818949	-0.271831	0.908186	1.48528	0.762955
all-unigene001488	-1.17588	0.814414	0.371803	0.909625	-6.63371	0.861595	-7.56857	0.786059
all-unigene001489	-7.37907	0.806932	#N/A	#N/A	#N/A	#N/A	#N/A	#N/A
all-unigene001490	-2.12059	0.594723	-0.0422733	0.906099	-6.63371	0.861595	#N/A	#N/A
all-unigene001491	-9.10481	0.340199	#N/A	#N/A	#N/A	#N/A	#N/A	#N/A
all-unigene001492	-10.5836	0.00738361	#N/A	#N/A	#N/A	#N/A	8.31626	0.678103
all-unigene001493	-11.1728	0.00056815	#N/A	#N/A	#N/A	#N/A	#N/A	#N/A
all-unigene001494	#N/A	#N/A	#N/A	#N/A	#N/A	#N/A	#N/A	#N/A
all-unigene001495	-2.5398	0.443123	-0.245539	0.905325	6.68271	0.857739	#N/A	#N/A
all-unigene001496	-8.46194	0.596105	7.62981	0.825139	#N/A	#N/A	#N/A	#N/A
all-unigene001497	-9.43136	0.167786	-7.67229	0.778479	#N/A	#N/A	#N/A	#N/A
all-unigene001498	-1.12413	0.809198	0.540049	0.903325	-0.0573838	0.923326	0.00649229	0.915291
all-unigene001499	-9.35964	0.226312	-9.66698	0.127602	-0.0941663	0.911509	#N/A	#N/A
all-unigene001500	1.03639	0.85864	6.63708	0.872551	#N/A	#N/A	#N/A	#N/A
all-unigene001501	-8.87897	0.38016	-4.8786	0.914773	#N/A	#N/A	#N/A	#N/A
all-unigene001502	-9.62375	0.134723	8.62616	0.585566	#N/A	#N/A	#N/A	#N/A
all-unigene001503	0.42529	0.900486	1.75638	0.555455	0.698313	0.892281	-0.417464	0.914472
all-unigene001504	-1.41334	0.744447	-0.460053	0.903682	-7.62643	0.770055	-7.56857	0.786059
all-unigene001505	-2.75143	0.52834	1.94681	0.815917	1.04571	0.875814	#N/A	#N/A
all-unigene001506	0.49142	0.88022	-1.71731	0.683441	-0.364494	0.904102	0.119259	0.909775
all-unigene001507	-9.62375	0.138955	#N/A	#N/A	#N/A	#N/A	#N/A	#N/A
all-unigene001508	-0.953833	0.842118	7.62981	0.787488	-7.62643	0.770055	0.719262	0.889655
all-unigene001509	-8.62557	0.479719	#N/A	#N/A	#N/A	#N/A	0.164164	0.900501
all-unigene001510	#N/A	#N/A	#N/A	#N/A	#N/A	#N/A	#N/A	#N/A
all-unigene001511	0.0437684	0.881434	6.63708	0.872551	#N/A	#N/A	#N/A	#N/A
all-unigene001512	-7.96683	0.724985	-7.62115	0.823845	#N/A	#N/A	#N/A	#N/A
all-unigene001513	-1.09204	0.838378	-1.75345	0.782266	-0.696828	0.903512	8.31626	0.678103
all-unigene001514	#N/A	#N/A	#N/A	#N/A	#N/A	#N/A	#N/A	#N/A
all-unigene001515	-6.63649	0.862996	7.62981	0.817844	#N/A	#N/A	-6.57615	0.897045
all-unigene001516	-1.37306	0.778843	8.79568	0.530069	#N/A	#N/A	#N/A	#N/A
all-unigene001517	-9.79347	0.0902089	-1.61782	0.865467	#N/A	#N/A	#N/A	#N/A
all-unigene001518	-7.62922	0.775849	-6.67935	0.889583	#N/A	#N/A	#N/A	#N/A
all-unigene001519	-10.0827	0.032802	0.127079	0.918663	#N/A	#N/A	-6.57615	0.867478
all-unigene001520	-2.68839	0.198226	0.146957	0.905408	0.0546584	0.905811	-0.831908	0.881563
all-unigene001521	-0.796397	0.847454	-0.788796	0.87952	-0.75642	0.887382	-0.472376	0.903568
all-unigene001522	-1.53182	0.835778	2.94499	0.499697	#N/A	#N/A	#N/A	#N/A
all-unigene001523	-8.21175	0.661444	#N/A	#N/A	#N/A	#N/A	#N/A	#N/A
all-unigene001524	-9.18267	0.298927	-6.67935	0.889583	#N/A	#N/A	7.19084	0.859004
all-unigene001525	-6.63649	0.838116	#N/A	#N/A	#N/A	#N/A	#N/A	#N/A
all-unigene001526	-2.26684	0.702331	-8.7321	0.486219	1.05533	0.871204	#N/A	#N/A
all-unigene001527	-1.86044	0.544869	-0.710472	0.889331	-0.211357	0.909699	0.0338088	0.906535
all-unigene001528	-6.63649	0.838116	#N/A	#N/A	#N/A	#N/A	#N/A	#N/A
all-unigene001529	-6.63649	0.862996	#N/A	#N/A	7.67567	0.813501	#N/A	#N/A
all-unigene001530	#N/A	#N/A	#N/A	#N/A	7.67567	0.813261	7.36779	0.844405
all-unigene001531	-1.53182	0.835778	-9.26687	0.287572	8.25828	0.700131	7.73355	0.799924
all-unigene001532	-8.62557	0.530547	-0.0425542	0.909071	0.631851	0.902904	0.579161	0.896757
all-unigene001533	-9.20932	0.247054	#N/A	#N/A	#N/A	#N/A	9.05141	0.314145
all-unigene001534	-0.178239	0.887791	-2.61546	0.646855	#N/A	#N/A	-6.57615	0.867478
all-unigene001535	-0.435994	0.885819	-0.289539	0.932027	-0.462641	0.913375	0.164164	0.913436
all-unigene001536	-0.954976	0.831158	-1.61782	0.856452	#N/A	#N/A	#N/A	#N/A
all-unigene001537	-2.75143	0.545616	-7.67229	0.809849	-6.63371	0.895847	#N/A	#N/A
all-unigene001538	#N/A	#N/A	-1.61782	0.856452	#N/A	#N/A	#N/A	#N/A
all-unigene001539	-3.26537	0.270104	-0.0422733	0.906099	#N/A	#N/A	#N/A	#N/A
all-unigene001540	1.26342	0.801275	0.540049	0.899568	-1.94701	0.598664	-1.56815	0.761103
all-unigene001541	-6.63649	0.838116	6.63708	0.872551	#N/A	#N/A	#N/A	#N/A
all-unigene001542	-6.63649	0.866885	#N/A	#N/A	#N/A	#N/A	6.74032	0.887502
all-unigene001543	#N/A	#N/A	#N/A	#N/A	#N/A	#N/A	#N/A	#N/A
all-unigene001544	-2.94381	0.435422	1.53299	0.862522	#N/A	#N/A	#N/A	#N/A
all-unigene001545	-1.53182	0.825214	-0.756884	0.888814	#N/A	#N/A	#N/A	#N/A
all-unigene001546	-8.21175	0.615021	#N/A	#N/A	#N/A	#N/A	#N/A	#N/A
all-unigene001547	-1.27389	0.818576	0.950461	0.893147	0.0492426	0.904105	-6.57615	0.867478
all-unigene001548	-2.27243	0.526697	7.62981	0.817844	-6.63371	0.895847	0.164981	0.907648
all-unigene001549	-0.370802	0.891895	0.785115	0.883875	#N/A	#N/A	#N/A	#N/A
all-unigene001550	#N/A	#N/A	#N/A	#N/A	6.68271	0.857739	#N/A	#N/A
all-unigene001551	-9.94531	0.0492269	#N/A	#N/A	#N/A	#N/A	8.8509	0.403127
all-unigene001552	-0.538872	0.869615	-6.67935	0.86949	1.04196	0.887478	-8.56477	0.552643
all-unigene001553	-7.62922	0.739393	6.63708	0.872551	-7.62643	0.770055	0.164164	0.900501
all-unigene001554	7.10924	0.801189	-0.229577	0.905373	6.68271	0.857739	#N/A	#N/A
all-unigene001555	-2.52938	0.619556	-6.67935	0.86949	6.68271	0.857739	6.74032	0.854821
all-unigene001556	-9.79347	0.0742323	-0.0424836	0.905307	#N/A	#N/A	#N/A	#N/A
all-unigene001557	-2.17116	0.64602	0.370198	0.903038	9.47798	0.142152	1.06705	0.86197
all-unigene001558	-3.11353	0.34763	-2.03168	0.80461	1.04196	0.887478	#N/A	#N/A
all-unigene001559	-1.53876	0.702453	-0.305172	0.908911	#N/A	#N/A	#N/A	#N/A
all-unigene001560	-8.87293	0.38262	0.0519107	0.90515	#N/A	#N/A	#N/A	#N/A
all-unigene001561	#N/A	#N/A	#N/A	#N/A	#N/A	#N/A	#N/A	#N/A
all-unigene001562	#N/A	#N/A	#N/A	#N/A	#N/A	#N/A	#N/A	#N/A
all-unigene001563	-2.52938	0.619556	-1.03522	0.890661	1.04196	0.887478	-1.41068	0.864003
all-unigene001564	-7.62922	0.775849	#N/A	#N/A	#N/A	#N/A	#N/A	#N/A
all-unigene001565	-9.20932	0.247054	#N/A	#N/A	#N/A	#N/A	#N/A	#N/A
all-unigene001566	-1.67534	0.692366	8.85521	0.442511	-1.22445	0.859341	#N/A	#N/A
all-unigene001567	0.139532	0.885737	-0.804544	0.884128	#N/A	#N/A	#N/A	#N/A
all-unigene001568	-0.952692	0.853673	9.20991	0.324954	0.0489988	0.916893	#N/A	#N/A
all-unigene001569	#N/A	#N/A	#N/A	#N/A	#N/A	#N/A	#N/A	#N/A
all-unigene001570	-6.63649	0.862996	6.63708	0.892218	#N/A	#N/A	#N/A	#N/A
all-unigene001571	7.66569	0.73019	6.59358	0.874626	#N/A	#N/A	#N/A	#N/A
all-unigene001572	-0.415135	0.914807	2.13071	0.123534	#N/A	#N/A	#N/A	#N/A
all-unigene001573	-8.9781	0.395534	-7.70072	0.813649	-8.20416	0.719711	#N/A	#N/A
all-unigene001574	-2.75744	0.247645	0.914624	0.878548	#N/A	#N/A	#N/A	#N/A
all-unigene001575	-0.954404	0.837078	0.484601	0.9171	8.33301	0.603431	1.14395	0.852263
all-unigene001576	-10.0827	0.032802	#N/A	#N/A	#N/A	#N/A	9.05141	0.314145
all-unigene001577	-6.63649	0.838116	#N/A	#N/A	#N/A	#N/A	#N/A	#N/A
all-unigene001578	-0.710875	0.857847	-1.25371	0.881033	1.12576	0.861993	-2.40814	0.719292
all-unigene001579	2.49322	0.0092083	-0.874251	0.891925	-0.13558	0.980301	0.493521	0.971525
all-unigene001580	-8.20695	0.670292	-1.76791	0.853705	-6.63371	0.895701	#N/A	#N/A
all-unigene001581	-7.62922	0.739393	#N/A	#N/A	-6.63371	0.861595	#N/A	#N/A
all-unigene001582	-0.177361	0.882695	-8.26445	0.695061	-0.660058	0.891441	-1.62624	0.734813
all-unigene001583	-2.12059	0.594723	-2.61546	0.646855	#N/A	#N/A	#N/A	#N/A
all-unigene001584	-6.63649	0.862996	-1.61782	0.865467	#N/A	#N/A	#N/A	#N/A
all-unigene001585	-0.0385441	0.950673	-2.41154	0.0771922	-1.74687	0.561247	#N/A	#N/A
all-unigene001586	-9.20932	0.247054	-0.0426351	0.916062	-6.63371	0.861595	7.73355	0.749395
all-unigene001587	-9.79347	0.0742323	-7.67229	0.778479	#N/A	#N/A	-6.57615	0.867478
all-unigene001588	-7.62922	0.775849	-7.67229	0.809849	6.68271	0.892847	-6.57615	0.897045
all-unigene001589	-9.30901	0.253041	-8.05469	0.754435	#N/A	#N/A	#N/A	#N/A
all-unigene001590	-6.95552	0.848317	#N/A	#N/A	#N/A	#N/A	#N/A	#N/A
all-unigene001591	0.0437684	0.881948	6.63708	0.89686	1.04196	0.900704	0.747682	0.895267
all-unigene001592	-9.92206	0.0664832	-2.61546	0.667246	2.29656	0.373154	0.486641	0.898598
all-unigene001593	-9.05759	0.307238	#N/A	#N/A	#N/A	#N/A	#N/A	#N/A
all-unigene001594	-7.62922	0.739393	#N/A	#N/A	-6.63371	0.861595	-0.828256	0.890841
all-unigene001595	-9.62375	0.111981	-8.2549	0.655138	1.04571	0.875814	0.164981	0.900315
all-unigene001596	0.786377	0.851855	1.12531	0.845687	-1.05144	0.827606	-0.371062	0.915706
all-unigene001597	#N/A	#N/A	#N/A	#N/A	#N/A	#N/A	#N/A	#N/A
all-unigene001598	-9.43136	0.167786	#N/A	#N/A	#N/A	#N/A	#N/A	#N/A
all-unigene001599	-0.802907	0.852545	-0.0425895	0.908997	-0.4352	0.906377	-2.14562	0.767304
all-unigene001600	#N/A	#N/A	#N/A	#N/A	#N/A	#N/A	#N/A	#N/A
all-unigene001601	-10.3235	0.0184651	7.65118	0.815149	#N/A	#N/A	#N/A	#N/A
all-unigene001602	-8.21175	0.661444	6.63708	0.892218	#N/A	#N/A	#N/A	#N/A
all-unigene001603	-8.48195	0.581175	9.01487	0.418103	#N/A	#N/A	0.164981	0.907648
all-unigene001604	0.0434434	0.877692	-6.67935	0.86949	#N/A	#N/A	-6.57615	0.867478
all-unigene001605	-11.5365	6.79e-05	11.1182	0.000400644	#N/A	#N/A	#N/A	#N/A
all-unigene001606	-8.21175	0.615021	6.63708	0.872551	#N/A	#N/A	6.74032	0.854821
all-unigene001607	-10.0827	0.0403547	7.62981	0.817844	-9.20652	0.323485	-0.624231	0.896619
all-unigene001608	-9.20932	0.247054	6.63708	0.872551	-7.62643	0.770055	6.74032	0.854821
all-unigene001609	-1.30328	0.7101	-1.23414	0.794257	-0.142965	0.917453	0.865385	0.869845
all-unigene001610	-9.20932	0.294905	0.692464	0.894848	-1.5049	0.784644	-0.95098	0.852676
all-unigene001611	0.0437321	0.878524	-0.45641	0.901865	6.68271	0.857739	6.74032	0.854821
all-unigene001612	0.269494	0.883246	0.774504	0.882986	-0.983072	0.878254	0.593863	0.898501
all-unigene001613	-2.75143	0.52834	#N/A	#N/A	7.67567	0.758821	#N/A	#N/A
all-unigene001614	-1.81554	0.616896	-9.8431	0.066289	#N/A	#N/A	#N/A	#N/A
all-unigene001615	7.27918	0.815269	-8.98997	0.419595	#N/A	#N/A	#N/A	#N/A
all-unigene001616	-1.94564	0.784102	-0.0422733	0.914347	1.62457	0.867401	-6.57615	0.897045
all-unigene001617	-1.99027	0.628981	#N/A	#N/A	-0.129745	0.954996	-0.365771	0.917035
all-unigene001618	-0.949288	0.871294	-0.0422733	0.914347	6.68271	0.892847	#N/A	#N/A
all-unigene001619	#N/A	#N/A	6.63708	0.872551	-1.52144	0.859631	-6.57615	0.867478
all-unigene001620	-3.37128	0.00125928	1.14227	0.778645	#N/A	#N/A	#N/A	#N/A
all-unigene001621	-1.69713	0.59864	1.39443	0.693637	-8.47118	0.643113	#N/A	#N/A
all-unigene001622	-2.12059	0.594723	-1.84478	0.75063	1.86267	0.764695	-1.24661	0.833902
all-unigene001623	#N/A	#N/A	#N/A	#N/A	#N/A	#N/A	#N/A	#N/A
all-unigene001624	-2.26684	0.716784	0.198146	0.920087	-1.69141	0.723339	-1.41491	0.836801
all-unigene001625	-1.65514	0.501237	2.32089	0.0784929	1.01253	0.842034	-1.62277	0.552347
all-unigene001626	1.61899	0.817877	0.335918	0.905809	2.34176	0.920105	-7.3688	0.809886
all-unigene001627	-1.94564	0.771721	-0.625087	0.897335	-1.94006	0.811108	-7.56857	0.786059
all-unigene001628	-9.79347	0.0932155	-8.18115	0.726449	-0.516138	0.906994	#N/A	#N/A
all-unigene001629	6.99905	0.839445	#N/A	#N/A	#N/A	#N/A	#N/A	#N/A
all-unigene001630	#N/A	#N/A	0.950461	0.893147	#N/A	#N/A	#N/A	#N/A
all-unigene001631	-2.01761	0.714918	8.94736	0.449687	8.25828	0.700131	#N/A	#N/A
all-unigene001632	-7.62922	0.739393	#N/A	#N/A	#N/A	#N/A	#N/A	#N/A
all-unigene001633	-1.94564	0.771721	0.95387	0.882654	-6.63371	0.861595	-6.57615	0.867478
all-unigene001634	-0.691286	0.862473	-8.66875	0.512306	#N/A	#N/A	#N/A	#N/A
all-unigene001635	-7.62922	0.739393	7.62981	0.787488	6.68271	0.857739	0.164164	0.900501
all-unigene001636	-1.53644	0.781629	-2.03168	0.81569	-0.687221	0.892978	-1.02585	0.833835
all-unigene001637	-2.27243	0.526697	-1.04082	0.85921	6.68271	0.892847	-8.151	0.738411
all-unigene001638	-8.21175	0.615021	#N/A	#N/A	#N/A	#N/A	7.73355	0.749395
all-unigene001639	-9.62375	0.111981	#N/A	#N/A	#N/A	#N/A	9.8982	0.0481101
all-unigene001640	-1.56649	0.539629	-0.540981	0.900587	#N/A	#N/A	#N/A	#N/A
all-unigene001641	-1.23153	0.714993	0.652929	0.925017	-0.218153	0.968199	0.289385	0.966617
all-unigene001642	#N/A	#N/A	#N/A	#N/A	#N/A	#N/A	#N/A	#N/A
all-unigene001643	-7.62922	0.739393	#N/A	#N/A	#N/A	#N/A	#N/A	#N/A
all-unigene001644	-0.949288	0.861743	6.63708	0.872551	#N/A	#N/A	#N/A	#N/A
all-unigene001645	6.67993	0.834342	-0.0422733	0.906099	0.0489988	0.90286	#N/A	#N/A
all-unigene001646	-1.14171	0.78878	0.470977	0.903529	-1.56479	0.820524	-9.49464	0.218056
all-unigene001647	#N/A	#N/A	#N/A	#N/A	#N/A	#N/A	#N/A	#N/A
all-unigene001648	-8.62557	0.479719	0.950461	0.893147	-6.63371	0.861595	6.74032	0.854821
all-unigene001649	-6.63649	0.862996	#N/A	#N/A	#N/A	#N/A	-7.56857	0.830653
all-unigene001650	0.0434434	0.88827	6.63708	0.892218	#N/A	#N/A	#N/A	#N/A
all-unigene001651	-8.69579	0.512561	6.63708	0.89686	7.67567	0.813261	#N/A	#N/A
all-unigene001652	-3.11353	0.34763	0.540049	0.899568	#N/A	#N/A	#N/A	#N/A
all-unigene001653	-0.538872	0.874058	0.540049	0.903325	#N/A	#N/A	#N/A	#N/A
all-unigene001654	-8.46194	0.587794	#N/A	#N/A	6.95528	0.878928	-6.67277	0.893199
all-unigene001655	-8.21175	0.669056	-7.22088	0.862904	#N/A	#N/A	#N/A	#N/A
all-unigene001656	-1.93407	0.630036	-0.065304	0.90936	8.52053	0.618446	3.03668	0.0808357
all-unigene001657	-0.31829	0.883871	-0.879706	0.873167	-0.300905	0.90805	-8.88593	0.498055
all-unigene001658	-11.546	6.45e-05	1.94846	0.490653	7.13309	0.825384	1.31571	0.809014
all-unigene001659	-9.04956	0.364363	8.26874	0.709757	#N/A	#N/A	0.240173	0.909431
all-unigene001660	-8.22131	0.666577	0.557979	0.900318	-0.406125	0.906567	-2.71198	0.659497
all-unigene001661	-1.28832	0.817218	1.53299	0.862522	6.68271	0.857739	-0.828256	0.890841
all-unigene001662	-2.06794	0.618168	2.61222	0.657757	-7.62643	0.822722	-8.151	0.738411
all-unigene001663	-8.62557	0.479719	#N/A	#N/A	-6.63371	0.861595	-0.828256	0.890841
all-unigene001664	-0.713454	0.866024	0.745279	0.890228	-0.120294	0.919973	-0.570418	0.897777
all-unigene001665	-7.98377	0.714679	6.63708	0.892218	6.68271	0.892847	#N/A	#N/A
all-unigene001666	-0.148569	0.891307	#N/A	#N/A	#N/A	#N/A	#N/A	#N/A
all-unigene001667	-3.11353	0.34763	-0.0425542	0.906835	#N/A	#N/A	#N/A	#N/A
all-unigene001668	0.306352	0.879926	-0.0426108	0.910763	0.231043	0.962252	-0.65864	0.920479
all-unigene001669	2.03285	0.771572	6.63708	0.892218	#N/A	#N/A	#N/A	#N/A
all-unigene001670	-7.62922	0.781665	-6.82851	0.887397	-1.05918	0.897694	0.87448	0.900208
all-unigene001671	-8.21175	0.615021	-7.67229	0.778479	#N/A	#N/A	#N/A	#N/A
all-unigene001672	-8.21175	0.615021	#N/A	#N/A	#N/A	#N/A	#N/A	#N/A
all-unigene001673	-8.62557	0.479719	#N/A	#N/A	#N/A	#N/A	#N/A	#N/A
all-unigene001674	7.67288	0.766493	6.65129	0.891616	#N/A	#N/A	#N/A	#N/A
all-unigene001675	#N/A	#N/A	-0.0422733	0.914347	#N/A	#N/A	#N/A	#N/A
all-unigene001676	-8.21175	0.615021	-0.0422733	0.906099	#N/A	#N/A	#N/A	#N/A
all-unigene001677	#N/A	#N/A	#N/A	#N/A	#N/A	#N/A	#N/A	#N/A
all-unigene001678	-0.633185	0.867336	1.12531	0.847185	0.784404	0.888044	7.73355	0.749395
all-unigene001679	#N/A	#N/A	#N/A	#N/A	#N/A	#N/A	#N/A	#N/A
all-unigene001680	-0.691286	0.862473	6.63708	0.872551	0.633149	0.896067	-2.68714	0.767789
all-unigene001681	-2.62141	0.126629	1.84034	0.412253	-0.288958	0.902272	0.172689	0.900087
all-unigene001682	-0.949288	0.871294	#N/A	#N/A	#N/A	#N/A	-6.57615	0.897045
all-unigene001683	-1.23201	0.779518	-0.861631	0.884894	1.48056	0.812072	-9.14846	0.309545
all-unigene001684	#N/A	#N/A	#N/A	#N/A	#N/A	#N/A	#N/A	#N/A
all-unigene001685	-7.62922	0.739393	#N/A	#N/A	#N/A	#N/A	#N/A	#N/A
all-unigene001686	#N/A	#N/A	-8.65792	0.516667	-0.01824	0.906669	-8.12684	0.684241
all-unigene001687	-1.88435	0.591399	-1.31884	0.816053	0.226462	0.915282	-0.442703	0.90203
all-unigene001688	-8.62557	0.479719	7.62981	0.787488	-9.20652	0.254619	-0.845721	0.875553
all-unigene001689	-0.604288	0.938683	-0.651886	0.916535	-0.529074	0.917279	-12.0948	2.36e-06
all-unigene001690	-6.63649	0.862996	#N/A	#N/A	#N/A	#N/A	#N/A	#N/A
all-unigene001691	-8.78224	0.419144	#N/A	#N/A	#N/A	#N/A	7.73355	0.749395
all-unigene001692	-1.53182	0.825214	#N/A	#N/A	#N/A	#N/A	-8.56477	0.552643
all-unigene001693	-8.94677	0.352475	#N/A	#N/A	#N/A	#N/A	#N/A	#N/A
all-unigene001694	-10.3509	0.017407	#N/A	#N/A	#N/A	#N/A	8.89008	0.459941
all-unigene001695	-8.94677	0.400684	9.20991	0.324954	#N/A	#N/A	#N/A	#N/A
all-unigene001696	-9.20932	0.247054	-6.67935	0.86949	#N/A	#N/A	#N/A	#N/A
all-unigene001697	-2.4098	0.445819	2.53056	0.673112	0.24181	0.915645	-2.63223	0.614735
all-unigene001698	-0.539976	0.871231	1.27784	0.789642	0.0489988	0.90286	0.165255	0.902173
all-unigene001699	-0.0606095	0.89832	0.382898	0.914826	-2.02583	0.682907	-1.79276	0.730196
all-unigene001700	#N/A	#N/A	#N/A	#N/A	#N/A	#N/A	#N/A	#N/A
all-unigene001701	-9.74627	0.104723	6.33647	0.90735	#N/A	#N/A	-6.80046	0.888081
all-unigene001702	-2.2743	0.381617	-0.948984	0.872603	0.571458	0.901044	0.75943	0.883801
all-unigene001703	-6.63649	0.838116	#N/A	#N/A	#N/A	#N/A	#N/A	#N/A
all-unigene001704	0.751638	0.868431	-8.2549	0.655138	0.740276	0.8885	-0.869991	0.871926
all-unigene001705	-7.62922	0.781665	#N/A	#N/A	#N/A	#N/A	#N/A	#N/A
all-unigene001706	-2.52938	0.619556	6.63708	0.872551	#N/A	#N/A	#N/A	#N/A
all-unigene001707	-7.62922	0.775849	-6.67935	0.889583	1.62457	0.867401	#N/A	#N/A
all-unigene001708	2.35992	0.486291	-0.0424836	0.909891	#N/A	#N/A	#N/A	#N/A
all-unigene001709	-9.44162	0.164478	7.62981	0.787488	#N/A	#N/A	#N/A	#N/A
all-unigene001710	-5.38441	0.484724	-0.302704	0.908764	#N/A	#N/A	#N/A	#N/A
all-unigene001711	-6.63649	0.862996	#N/A	#N/A	0.0489988	0.916893	#N/A	#N/A
all-unigene001712	-7.62922	0.775849	#N/A	#N/A	#N/A	#N/A	#N/A	#N/A
all-unigene001713	-8.21175	0.661444	#N/A	#N/A	-1.22338	0.892628	#N/A	#N/A
all-unigene001714	-0.851254	0.847288	0.246738	0.943592	-0.171537	0.94013	0.498086	0.924809
all-unigene001715	#N/A	#N/A	#N/A	#N/A	#N/A	#N/A	7.76199	0.79662
all-unigene001716	-7.62922	0.739393	#N/A	#N/A	#N/A	#N/A	#N/A	#N/A
all-unigene001717	#N/A	#N/A	#N/A	#N/A	#N/A	#N/A	#N/A	#N/A
all-unigene001718	#N/A	#N/A	#N/A	#N/A	#N/A	#N/A	#N/A	#N/A
all-unigene001719	-8.62557	0.479719	-8.2549	0.655138	2.35965	0.7231	#N/A	#N/A
all-unigene001720	#N/A	#N/A	#N/A	#N/A	#N/A	#N/A	#N/A	#N/A
all-unigene001721	-8.21175	0.615021	-0.0422733	0.906099	7.67567	0.758821	#N/A	#N/A
all-unigene001722	-6.66478	0.861541	-6.95191	0.875501	0.0445232	0.910727	9.31399	0.257652
all-unigene001723	0.70865	0.862464	2.29261	0.495084	-8.21851	0.716151	-8.71819	0.569116
all-unigene001724	-0.369023	0.873746	8.43404	0.606361	#N/A	#N/A	#N/A	#N/A
all-unigene001725	-8.62557	0.479719	#N/A	#N/A	6.68271	0.857739	-8.151	0.678321
all-unigene001726	#N/A	#N/A	#N/A	#N/A	0.367299	0.901844	6.74032	0.854821
all-unigene001727	-9.20932	0.247054	-0.683138	0.89288	0.0492426	0.904105	0.164981	0.900315
all-unigene001728	-2.27243	0.526697	#N/A	#N/A	-1.83177	0.843874	-1.03513	0.895931
all-unigene001729	-6.63649	0.838116	0.950461	0.893147	#N/A	#N/A	#N/A	#N/A
all-unigene001730	-8.21175	0.661444	#N/A	#N/A	-6.63371	0.895847	#N/A	#N/A
all-unigene001731	-0.765623	0.854975	0.58253	0.900944	-0.943718	0.903375	8.73016	0.530831
all-unigene001732	-7.62922	0.775849	-0.0422733	0.914347	0.0489988	0.916893	2.15401	0.796185
all-unigene001733	-7.77258	0.760103	#N/A	#N/A	#N/A	#N/A	#N/A	#N/A
all-unigene001734	-2.52938	0.619556	0.278608	0.90749	#N/A	#N/A	#N/A	#N/A
all-unigene001735	7.67288	0.728981	-1.61782	0.856452	-0.533284	0.89885	-0.417446	0.897727
all-unigene001736	-6.63649	0.838116	#N/A	#N/A	#N/A	#N/A	#N/A	#N/A
all-unigene001737	-6.63649	0.862996	#N/A	#N/A	7.67567	0.813501	#N/A	#N/A
all-unigene001738	-6.63649	0.862996	#N/A	#N/A	#N/A	#N/A	6.75454	0.886232
all-unigene001739	-6.63649	0.866885	#N/A	#N/A	#N/A	#N/A	#N/A	#N/A
all-unigene001740	-1.53182	0.825214	-9.25253	0.254608	0.631851	0.896179	0.164164	0.900501
all-unigene001741	#N/A	#N/A	#N/A	#N/A	#N/A	#N/A	#N/A	#N/A
all-unigene001742	-1.94564	0.771721	-1.03522	0.890661	#N/A	#N/A	#N/A	#N/A
all-unigene001743	-8.94677	0.352475	#N/A	#N/A	#N/A	#N/A	#N/A	#N/A
all-unigene001744	-1.94564	0.771721	-0.625087	0.897335	#N/A	#N/A	#N/A	#N/A
all-unigene001745	-7.62922	0.739393	#N/A	#N/A	#N/A	#N/A	#N/A	#N/A
all-unigene001746	-0.709503	0.858132	0.414841	0.908648	0.172025	0.91304	1.58393	0.81925
all-unigene001747	-9.62375	0.111981	-1.03894	0.877613	#N/A	#N/A	#N/A	#N/A
all-unigene001748	#N/A	#N/A	#N/A	#N/A	#N/A	#N/A	#N/A	#N/A
all-unigene001749	#N/A	#N/A	#N/A	#N/A	#N/A	#N/A	#N/A	#N/A
all-unigene001750	-9.62734	0.137861	-7.89777	0.783799	#N/A	#N/A	#N/A	#N/A
all-unigene001751	-6.63649	0.866885	#N/A	#N/A	#N/A	#N/A	#N/A	#N/A
all-unigene001752	-2.75143	0.52834	-6.67935	0.86949	7.50842	0.783695	0.478332	0.897042
all-unigene001753	0.0343789	0.876341	-9.16852	0.291393	#N/A	#N/A	#N/A	#N/A
all-unigene001754	#N/A	#N/A	#N/A	#N/A	#N/A	#N/A	#N/A	#N/A
all-unigene001755	-8.21175	0.669056	-6.67935	0.894328	#N/A	#N/A	-6.57615	0.897576
all-unigene001756	#N/A	#N/A	#N/A	#N/A	#N/A	#N/A	#N/A	#N/A
all-unigene001757	-8.34445	0.632478	#N/A	#N/A	#N/A	#N/A	#N/A	#N/A
all-unigene001758	#N/A	#N/A	#N/A	#N/A	#N/A	#N/A	#N/A	#N/A
all-unigene001759	#N/A	#N/A	#N/A	#N/A	#N/A	#N/A	#N/A	#N/A
all-unigene001760	#N/A	#N/A	#N/A	#N/A	-6.63371	0.861595	#N/A	#N/A
all-unigene001761	-0.246557	0.919533	0.764959	0.88948	2.22975	0.330967	-11.262	0.000345505
all-unigene001762	2.03537	0.152273	-0.315038	0.925972	1.55966	0.282033	0.0664025	0.963201
all-unigene001763	-6.63649	0.866885	6.63708	0.89686	#N/A	#N/A	#N/A	#N/A
all-unigene001764	-9.20932	0.247054	#N/A	#N/A	#N/A	#N/A	#N/A	#N/A
all-unigene001765	#N/A	#N/A	-6.67935	0.86949	#N/A	#N/A	-7.56857	0.786059
all-unigene001766	-8.62557	0.530547	-7.67229	0.809849	#N/A	#N/A	#N/A	#N/A
all-unigene001767	-0.949288	0.871294	-7.67229	0.809849	#N/A	#N/A	6.74032	0.886924
all-unigene001768	-0.539976	0.871231	-0.363808	0.905607	2.35965	0.7231	0.164981	0.900315
all-unigene001769	#N/A	#N/A	1.11318	0.887243	-8.61556	0.510461	-1.41068	0.864003
all-unigene001770	-6.63649	0.838116	#N/A	#N/A	#N/A	#N/A	#N/A	#N/A
all-unigene001771	-8.21175	0.615021	#N/A	#N/A	#N/A	#N/A	#N/A	#N/A
all-unigene001772	#N/A	#N/A	#N/A	#N/A	#N/A	#N/A	#N/A	#N/A
all-unigene001773	-6.63649	0.862996	#N/A	#N/A	6.68271	0.892847	0.164164	0.913436
all-unigene001774	-0.746523	0.854403	0.576984	0.901588	#N/A	#N/A	-0.960156	0.891626
all-unigene001775	#N/A	#N/A	#N/A	#N/A	#N/A	#N/A	#N/A	#N/A
all-unigene001776	0.102562	0.882741	1.16749	0.87045	-6.63371	0.895847	#N/A	#N/A
all-unigene001777	-2.01772	0.548897	10.1511	0.0331045	0.14096	0.91189	8.13245	0.724911
all-unigene001778	6.67993	0.834342	#N/A	#N/A	#N/A	#N/A	#N/A	#N/A
all-unigene001779	2.33377	0.688036	-4.54399	0.917869	7.67567	0.758821	#N/A	#N/A
all-unigene001780	#N/A	#N/A	#N/A	#N/A	#N/A	#N/A	#N/A	#N/A
all-unigene001781	-9.03339	0.363297	-7.52108	0.828426	#N/A	#N/A	#N/A	#N/A
all-unigene001782	1.97821	0.620617	8.14865	0.738572	9.23659	0.296293	1.07461	0.853134
all-unigene001783	-2.52938	0.619556	0.950461	0.893147	#N/A	#N/A	#N/A	#N/A
all-unigene001784	-8.62557	0.530547	8.21234	0.713628	8.25828	0.700131	#N/A	#N/A
all-unigene001785	-0.949288	0.861743	7.62981	0.787488	-6.63371	0.861595	#N/A	#N/A
all-unigene001786	#N/A	#N/A	#N/A	#N/A	-6.63371	0.895701	#N/A	#N/A
all-unigene001787	-0.949288	0.861743	-6.67935	0.86949	-6.63371	0.861595	6.74032	0.854821
all-unigene001788	-6.81115	0.853329	0.840473	0.902644	6.68271	0.892847	-0.248513	0.90475
all-unigene001789	#N/A	#N/A	-6.67935	0.86949	0.0489988	0.90286	0.164164	0.900501
all-unigene001790	-6.63649	0.838116	#N/A	#N/A	#N/A	#N/A	#N/A	#N/A
all-unigene001791	-2.52938	0.619556	-2.03168	0.80461	7.67567	0.758821	-0.417446	0.897727
all-unigene001792	-9.20932	0.247054	-0.810637	0.886622	#N/A	#N/A	6.74032	0.854821
all-unigene001793	-1.17588	0.814414	0.540049	0.899568	-1.92585	0.81235	-0.417446	0.897727
all-unigene001794	#N/A	#N/A	#N/A	#N/A	#N/A	#N/A	#N/A	#N/A
all-unigene001795	-7.62922	0.775849	-2.61546	0.662641	6.68271	0.892847	#N/A	#N/A
all-unigene001796	-0.691286	0.862473	-1.84478	0.75063	6.68271	0.857739	6.74032	0.854821
all-unigene001797	-6.63649	0.838116	#N/A	#N/A	#N/A	#N/A	#N/A	#N/A
all-unigene001798	-9.43136	0.167786	-1.03522	0.890661	0.784404	0.888044	-0.832205	0.88025
all-unigene001799	#N/A	#N/A	#N/A	#N/A	#N/A	#N/A	#N/A	#N/A
all-unigene001800	-7.84234	0.748329	-6.67935	0.894328	-6.63371	0.895701	#N/A	#N/A
all-unigene001801	-9.14552	0.271964	#N/A	#N/A	#N/A	#N/A	#N/A	#N/A
all-unigene001802	-1.53182	0.837756	8.21234	0.723788	2.03843	0.816438	-0.828256	0.902713
all-unigene001803	-1.53182	0.825214	-8.2549	0.655138	1.04196	0.887478	0.164164	0.900501
all-unigene001804	-7.62922	0.739393	#N/A	#N/A	6.68271	0.857739	#N/A	#N/A
all-unigene001805	-7.5855	0.787598	#N/A	#N/A	#N/A	#N/A	0.164164	0.913705
all-unigene001806	-0.950417	0.834201	#N/A	#N/A	#N/A	#N/A	#N/A	#N/A
all-unigene001807	#N/A	#N/A	#N/A	#N/A	#N/A	#N/A	#N/A	#N/A
all-unigene001808	#N/A	#N/A	#N/A	#N/A	#N/A	#N/A	#N/A	#N/A
all-unigene001809	-10.0827	0.0403547	-0.997998	0.886752	-6.63371	0.895847	#N/A	#N/A
all-unigene001810	5.95232	0.891339	#N/A	#N/A	#N/A	#N/A	#N/A	#N/A
all-unigene001811	-1.94564	0.771721	-0.0426108	0.911348	7.67567	0.758821	-7.56857	0.786059
all-unigene001812	-8.21175	0.615021	#N/A	#N/A	#N/A	#N/A	#N/A	#N/A
all-unigene001813	-0.802907	0.849007	0.0973355	0.919455	-1.52625	0.874051	-0.831214	0.889725
all-unigene001814	6.67993	0.834342	#N/A	#N/A	-6.63371	0.861595	-6.57615	0.867478
all-unigene001815	0.364988	0.877024	-1.61782	0.865467	2.21367	0.600991	-9.37049	0.27231
all-unigene001816	-9.20932	0.294905	5.56406	0.923914	#N/A	#N/A	#N/A	#N/A
all-unigene001817	-2.42294	0.513853	#N/A	#N/A	1.04196	0.887478	#N/A	#N/A
all-unigene001818	#N/A	#N/A	#N/A	#N/A	#N/A	#N/A	#N/A	#N/A
all-unigene001819	-1.27596	0.694897	1.69594	0.475284	1.82445	0.261805	10.8209	0.00172789
all-unigene001820	-9.94531	0.0492269	-8.23073	0.66193	#N/A	#N/A	#N/A	#N/A
all-unigene001821	-8.21175	0.615021	#N/A	#N/A	7.67567	0.758821	0.164164	0.900501
all-unigene001822	-8.90292	0.370401	7.0341	0.848724	-6.95273	0.841782	#N/A	#N/A
all-unigene001823	2.95727	0.0109621	-1.07694	0.822264	#N/A	#N/A	#N/A	#N/A
all-unigene001824	-1.53644	0.782718	-6.67935	0.894328	-0.947102	0.888248	-2.14562	0.786257
all-unigene001825	-11.791	2.15e-05	10.4123	0.0134171	-1.48692	0.818754	-10.488	0.0120525
all-unigene001826	-8.94677	0.400684	0.950461	0.900755	-6.63371	0.895847	-7.56857	0.830653
all-unigene001827	-2.12059	0.594723	8.62616	0.53744	8.45094	0.563351	#N/A	#N/A
all-unigene001828	-0.642304	0.887384	-0.259356	0.93388	0.463854	0.906828	-2.577	0.363244
all-unigene001829	-2.10651	0.489939	-2.25556	0.587123	#N/A	#N/A	#N/A	#N/A
all-unigene001830	-1.17913	0.763656	-0.430988	0.930125	1.26934	0.80271	-0.966082	0.850753
all-unigene001831	#N/A	#N/A	#N/A	#N/A	#N/A	#N/A	#N/A	#N/A
all-unigene001832	-8.46596	0.594792	#N/A	#N/A	#N/A	#N/A	#N/A	#N/A
all-unigene001833	0.502537	0.875502	6.7862	0.890357	-6.63371	0.895701	#N/A	#N/A
all-unigene001834	-1.41562	0.587917	-11.603	2.59e-05	-1.75803	0.78107	-0.947164	0.868293
all-unigene001835	-9.79347	0.0902089	8.10285	0.738986	-0.423409	0.905697	-8.85978	0.509419
all-unigene001836	-1.89069	0.300801	-0.341823	0.927468	-8.79868	0.43452	-6.57615	0.867478
all-unigene001837	-6.63649	0.838116	-6.67935	0.86949	#N/A	#N/A	-6.57615	0.867478
all-unigene001838	#N/A	#N/A	#N/A	#N/A	#N/A	#N/A	#N/A	#N/A
all-unigene001839	-7.62922	0.739393	7.62981	0.787488	-6.63371	0.861595	#N/A	#N/A
all-unigene001840	-8.95538	0.405379	-1.64145	0.865369	-2.53565	0.500301	-8.10227	0.749869
all-unigene001841	-2.01164	0.591763	-1.82334	0.804981	-1.52625	0.874051	-6.57615	0.897045
all-unigene001842	#N/A	#N/A	-2.83751	0.547107	0.631851	0.896179	-8.56477	0.552643
all-unigene001843	-0.691286	0.863404	#N/A	#N/A	#N/A	#N/A	#N/A	#N/A
all-unigene001844	#N/A	#N/A	#N/A	#N/A	#N/A	#N/A	#N/A	#N/A
all-unigene001845	-9.62375	0.111981	#N/A	#N/A	#N/A	#N/A	8.58253	0.515339
all-unigene001846	-8.21175	0.669056	#N/A	#N/A	#N/A	#N/A	6.74032	0.887502
all-unigene001847	-1.14929	0.786591	-1.26578	0.849825	5.3817	0.925524	#N/A	#N/A
all-unigene001848	-2.75143	0.52834	-0.0422733	0.906099	-6.63371	0.861595	#N/A	#N/A
all-unigene001849	6.67993	0.859727	#N/A	#N/A	7.38215	0.8468	6.74032	0.886924
all-unigene001850	-1.90557	0.435159	0.289699	0.91566	10.918	0.000884604	-11.1254	0.000698333
all-unigene001851	-6.63649	0.866885	#N/A	#N/A	#N/A	#N/A	#N/A	#N/A
all-unigene001852	-0.949288	0.871294	#N/A	#N/A	6.68271	0.892847	6.74032	0.886924
all-unigene001853	#N/A	#N/A	#N/A	#N/A	#N/A	#N/A	#N/A	#N/A
all-unigene001854	0.628471	0.884471	0.541949	0.914602	#N/A	#N/A	#N/A	#N/A
all-unigene001855	#N/A	#N/A	#N/A	#N/A	#N/A	#N/A	#N/A	#N/A
all-unigene001856	2.03835	0.640515	-1.69791	0.538518	0.372901	0.950298	-1.97753	0.304992
all-unigene001857	-1.12413	0.811813	-0.180028	0.921899	#N/A	#N/A	6.74032	0.854821
all-unigene001858	-4.19068	0.0184	-6.67935	0.86949	-8.48312	0.560347	-2.85636	0.508824
all-unigene001859	-2.42852	0.282509	0.456848	0.911633	-0.718995	0.895755	-0.038557	0.946905
all-unigene001860	#N/A	#N/A	#N/A	#N/A	#N/A	#N/A	#N/A	#N/A
all-unigene001861	-2.43805	0.184052	0.285693	0.918796	0.425607	0.905598	1.66074	0.832363
all-unigene001862	-7.6148	0.783654	#N/A	#N/A	#N/A	#N/A	4.24835	0.933835
all-unigene001863	#N/A	#N/A	#N/A	#N/A	#N/A	#N/A	#N/A	#N/A
all-unigene001864	#N/A	#N/A	0.557887	0.903512	0.0373077	0.91528	#N/A	#N/A
all-unigene001865	-0.362441	0.882287	0.495546	0.906798	-0.389001	0.915201	0.0473574	0.920356
all-unigene001866	-0.632774	0.882178	-1.43404	0.881577	2.99953	0.617758	#N/A	#N/A
all-unigene001867	#N/A	#N/A	#N/A	#N/A	7.83842	0.78934	#N/A	#N/A
all-unigene001868	-10.757	0.0036777	#N/A	#N/A	10.5726	0.00480418	#N/A	#N/A
all-unigene001869	-2.37754	0.114822	-1.60613	0.632801	-0.318096	0.923038	0.184351	0.937751
all-unigene001870	-7.60726	0.147894	-8.04917	0.755563	5.49763	0.495831	7.6972	0.806074
all-unigene001871	-8.21175	0.615021	-0.0422733	0.906099	#N/A	#N/A	#N/A	#N/A
all-unigene001872	#N/A	#N/A	#N/A	#N/A	#N/A	#N/A	#N/A	#N/A
all-unigene001873	-10.5298	0.00703282	8.60076	0.547164	#N/A	#N/A	#N/A	#N/A
all-unigene001874	-0.949288	0.871294	-7.67229	0.809849	0.999739	0.901591	-0.248513	0.90475
all-unigene001875	-6.63649	0.838116	-1.03522	0.890661	6.68271	0.857739	-8.56477	0.552643
all-unigene001876	-0.953833	0.842118	-3.0299	0.443403	#N/A	#N/A	#N/A	#N/A
all-unigene001877	-10.0827	0.032802	#N/A	#N/A	#N/A	#N/A	8.4225	0.574319
all-unigene001878	-1.05436	0.807355	4.25238	0.464651	#N/A	#N/A	#N/A	#N/A
all-unigene001879	-8.62557	0.479719	6.63708	0.872551	#N/A	#N/A	0.164164	0.900501
all-unigene001880	0.789933	0.848515	0.102101	0.928327	-0.146766	0.944925	-0.276764	0.935392
all-unigene001881	-7.62922	0.781665	#N/A	#N/A	#N/A	#N/A	-7.39331	0.848927
all-unigene001882	8.25549	0.596488	#N/A	#N/A	#N/A	#N/A	#N/A	#N/A
all-unigene001883	-6.63649	0.866885	6.63708	0.89686	-6.63371	0.895701	#N/A	#N/A
all-unigene001884	-9.94531	0.0623419	#N/A	#N/A	#N/A	#N/A	#N/A	#N/A
all-unigene001885	-9.20932	0.294905	6.63708	0.89686	-7.46725	0.840388	#N/A	#N/A
all-unigene001886	-9.43136	0.167786	-0.0425542	0.906835	0.0492426	0.904105	-9.26374	0.260194
all-unigene001887	-0.994567	0.848028	0.31666	0.90377	8.65768	0.483792	-8.58973	0.543553
all-unigene001888	-9.94531	0.0492269	#N/A	#N/A	#N/A	#N/A	#N/A	#N/A
all-unigene001889	-8.21175	0.615021	-7.67229	0.778479	#N/A	#N/A	#N/A	#N/A
all-unigene001890	-9.43136	0.167786	7.62981	0.787488	#N/A	#N/A	#N/A	#N/A
all-unigene001891	1.43117	0.629353	0.381015	0.92996	-0.258781	0.939922	-0.702034	0.906952
all-unigene001892	-1.53182	0.825214	-7.67229	0.778479	#N/A	#N/A	#N/A	#N/A
all-unigene001893	-1.42457	0.738939	1.26594	0.813222	#N/A	#N/A	#N/A	#N/A
all-unigene001894	-9.74792	0.104304	8.32745	0.694164	#N/A	#N/A	-7.93979	0.780327
all-unigene001895	-0.9753	0.837657	6.1884	0.890286	-0.490857	0.899978	0.690523	0.889186
all-unigene001896	0.467838	0.951091	-0.069309	0.958087	0.769262	0.89963	0.708205	0.911385
all-unigene001897	-0.158993	0.92242	0.649547	0.907257	#N/A	#N/A	#N/A	#N/A
all-unigene001898	-2.26684	0.702331	-0.0424836	0.905307	-6.63371	0.861595	#N/A	#N/A
all-unigene001899	0.778808	0.857103	-0.0424836	0.905307	7.67567	0.758821	-0.831214	0.884125
all-unigene001900	#N/A	#N/A	-8.2549	0.655138	#N/A	#N/A	#N/A	#N/A
all-unigene001901	-8.21175	0.669056	#N/A	#N/A	#N/A	#N/A	#N/A	#N/A
all-unigene001902	-1.49563	0.551519	-0.297906	0.965635	0.212197	0.978716	-13.2027	4.08e-10
all-unigene001903	-10.6228	0.00489922	#N/A	#N/A	#N/A	#N/A	#N/A	#N/A
all-unigene001904	-6.63649	0.862996	#N/A	#N/A	#N/A	#N/A	#N/A	#N/A
all-unigene001905	-9.43136	0.167786	#N/A	#N/A	#N/A	#N/A	#N/A	#N/A
all-unigene001906	-1.89574	0.301144	-0.220567	0.921686	-0.680649	0.913603	-0.138718	0.947025
all-unigene001907	-1.60559	0.743275	-2.58485	0.583395	-0.950573	0.86193	0.166967	0.92033
all-unigene001908	-2.94381	0.435422	-1.45464	0.80259	#N/A	#N/A	#N/A	#N/A
all-unigene001909	-6.63649	0.838116	#N/A	#N/A	#N/A	#N/A	#N/A	#N/A
all-unigene001910	0.450933	0.901024	-3.77442	0.0831768	7.67567	0.758821	#N/A	#N/A
all-unigene001911	-8.94677	0.352475	-6.67935	0.86949	#N/A	#N/A	#N/A	#N/A
all-unigene001912	-0.217418	0.92355	0.0830081	0.943266	-0.0194471	0.962657	-0.484665	0.93814
all-unigene001913	-1.51061	0.733383	0.675281	0.894946	1.04756	0.859059	0.144006	0.903212
all-unigene001914	-6.63649	0.838116	-6.67935	0.86949	6.68271	0.857739	#N/A	#N/A
all-unigene001915	-8.94677	0.352475	#N/A	#N/A	#N/A	#N/A	8.73016	0.455271
all-unigene001916	-10.2081	0.022019	#N/A	#N/A	-10.2641	0.0140241	1.69337	0.418036
all-unigene001917	0.458472	0.887055	0.0116844	0.922267	#N/A	#N/A	#N/A	#N/A
all-unigene001918	1.48311	0.648255	-1.38328	0.813232	0.425474	0.904785	0.16553	0.907419
all-unigene001919	#N/A	#N/A	#N/A	#N/A	#N/A	#N/A	#N/A	#N/A
all-unigene001920	-6.63649	0.862996	6.63708	0.892218	-0.943718	0.903443	-6.57615	0.897045
all-unigene001921	-10.6183	0.00621011	-1.11587	0.82868	10.0895	0.0335665	#N/A	#N/A
all-unigene001922	#N/A	#N/A	#N/A	#N/A	#N/A	#N/A	#N/A	#N/A
all-unigene001923	-8.94677	0.352475	#N/A	#N/A	#N/A	#N/A	#N/A	#N/A
all-unigene001924	-7.62922	0.775849	-2.03168	0.81569	-0.947102	0.88829	1.16159	0.870382
all-unigene001925	#N/A	#N/A	#N/A	#N/A	#N/A	#N/A	#N/A	#N/A
all-unigene001926	3.94982	0.0227323	1.61466	0.857634	1.10491	0.892422	-0.823144	0.886053
all-unigene001927	#N/A	#N/A	-10.7407	0.00292365	-10.7235	0.00276965	#N/A	#N/A
all-unigene001928	-1.54914	0.512173	-1.62656	0.532209	-0.0431264	0.952772	-0.451141	0.928936
all-unigene001929	-1.17588	0.814652	1.75966	0.775815	-0.943718	0.903443	-0.828256	0.90246
all-unigene001930	-1.05833	0.816523	-0.206226	0.90822	-0.435275	0.90713	0.06845	0.908472
all-unigene001931	-9.43136	0.167786	#N/A	#N/A	-9.42856	0.167751	#N/A	#N/A
all-unigene001932	0.236207	0.889485	10.4309	0.00962127	8.99336	0.337098	-8.56477	0.552643
all-unigene001933	-10.4241	0.0134196	#N/A	#N/A	-9.96254	0.0562313	9.27998	0.274374
all-unigene001934	-9.20932	0.247054	9.79406	0.0814757	-8.94397	0.370413	1.2053	0.860867
all-unigene001935	-9.20932	0.247054	-0.45641	0.901865	0.463183	0.901667	-0.31908	0.905948
all-unigene001936	0.00634153	0.922145	0.589329	0.906677	1.04939	0.860442	1.21179	0.844988
all-unigene001937	-2.53327	0.484789	-0.684984	0.892752	7.67567	0.758821	#N/A	#N/A
all-unigene001938	-8.94677	0.352475	#N/A	#N/A	#N/A	#N/A	6.74032	0.854821
all-unigene001939	0.0270009	0.964676	-1.32829	0.660416	0.0437439	0.955341	-0.702835	0.92736
all-unigene001940	-8.94677	0.400684	-0.0422733	0.914347	0.0489988	0.916893	-0.99094	0.897517
all-unigene001941	-10.291	0.0166793	#N/A	#N/A	#N/A	#N/A	#N/A	#N/A
all-unigene001942	1.21172	0.796335	1.44094	0.750485	1.04823	0.845309	-0.348349	0.909895
all-unigene001943	-2.4098	0.451637	-8.79938	0.506607	0.361504	0.906884	-0.584731	0.900747
all-unigene001944	-3.40275	0.205431	-9.66698	0.106724	#N/A	#N/A	8.31626	0.609534
all-unigene001945	-11.2664	0.000275557	-0.868366	0.877934	#N/A	#N/A	#N/A	#N/A
all-unigene001946	-2.18996	0.735721	1.94681	0.826449	#N/A	#N/A	-0.248513	0.90475
all-unigene001947	-0.288487	0.891382	0.976187	0.834605	9.57161	0.152858	2.2814	0.843738
all-unigene001948	0.269883	0.899353	-0.0594058	0.915051	-1.31279	0.86991	-0.761195	0.893017
all-unigene001949	0.266065	0.902421	-1.17857	0.828518	-0.818484	0.939564	-1.12632	0.812113
all-unigene001950	-6.67871	0.860809	#N/A	#N/A	#N/A	#N/A	-0.87763	0.901098
all-unigene001951	-7.62922	0.775849	7.62981	0.817844	#N/A	#N/A	-8.151	0.738411
all-unigene001952	-0.125899	0.894576	-0.778644	0.884764	0.464078	0.911981	0.16553	0.909445
all-unigene001953	-2.75143	0.52834	0.950461	0.893147	0.631851	0.896179	0.749222	0.885001
all-unigene001954	-1.07174	0.782249	0.238233	0.922911	-1.46368	0.74486	2.84933	0.0563734
all-unigene001955	-11.1316	0.000692056	#N/A	#N/A	-9.36331	0.249064	#N/A	#N/A
all-unigene001956	0.840617	0.839743	0.601718	0.897438	#N/A	#N/A	8.97148	0.42175
all-unigene001957	-0.752906	0.853144	-10.0409	0.0461425	#N/A	#N/A	#N/A	#N/A
all-unigene001958	-4.19006	0.00266585	0.470782	0.906036	-0.877832	0.871906	#N/A	#N/A
all-unigene001959	-10.4303	0.0101915	#N/A	#N/A	#N/A	#N/A	8.73016	0.455271
all-unigene001960	-13.3702	3.71e-10	-11.7209	9.16e-06	-0.0219599	0.963	#N/A	#N/A
all-unigene001961	-0.313539	0.879653	10.0461	0.0492355	8.17441	0.721332	1.19237	0.84126
all-unigene001962	-2.94381	0.45601	8.57116	0.61778	#N/A	#N/A	-3.24753	0.937852
all-unigene001963	0.0387717	0.932407	-9.44338	0.178144	0.173779	0.921299	0.437137	0.900472
all-unigene001964	-0.641307	0.864035	#N/A	#N/A	0.0134549	0.913265	0.882323	0.875294
all-unigene001965	#N/A	#N/A	-1.02101	0.898718	#N/A	#N/A	0.164164	0.913436
all-unigene001966	-2.53882	0.371289	-0.45641	0.901865	6.68271	0.857739	-6.57615	0.867478
all-unigene001967	-1.46946	0.574611	-0.732168	0.912025	#N/A	#N/A	#N/A	#N/A
all-unigene001968	-2.72883	0.239648	-1.44662	0.865284	#N/A	#N/A	#N/A	#N/A
all-unigene001969	-0.785534	0.849393	0.594201	0.898609	0.634016	0.893489	-0.133661	0.920238
all-unigene001970	-8.62557	0.530547	0.950461	0.900755	-1.32618	0.82613	0.900409	0.878914
all-unigene001971	-0.943651	0.836156	-1.01571	0.88093	-0.319883	0.913898	-0.362657	0.919106
all-unigene001972	-1.84191	0.751928	#N/A	#N/A	-8.56028	0.531856	7.73355	0.749395
all-unigene001973	#N/A	#N/A	#N/A	#N/A	#N/A	#N/A	#N/A	#N/A
all-unigene001974	-0.575148	0.869062	-0.042625	0.912241	#N/A	#N/A	#N/A	#N/A
all-unigene001975	-7.462	0.802917	-6.67935	0.894328	-6.63371	0.895701	-6.57615	0.897576
all-unigene001976	0.043823	0.893979	6.63708	0.872551	7.67567	0.758821	#N/A	#N/A
all-unigene001977	-2.39092	0.681828	-0.0422733	0.914347	-6.63371	0.895847	#N/A	#N/A
all-unigene001978	1.042	0.82365	-1.61782	0.865467	-0.0796152	0.916998	0.165696	0.920548
all-unigene001979	-1.75585	0.363503	-2.2649	0.129724	-6.92965	0.843442	#N/A	#N/A
all-unigene001980	0.364988	0.877512	0.95387	0.882654	0.338654	0.9174	-0.948577	0.859155
all-unigene001981	#N/A	#N/A	#N/A	#N/A	#N/A	#N/A	#N/A	#N/A
all-unigene001982	-0.635809	0.863857	1.10694	0.824342	0.777261	0.879309	-0.388455	0.903354
all-unigene001983	-1.10733	0.835496	-1.95476	0.822267	-0.154161	0.910233	2.10947	0.733421
all-unigene001984	#N/A	#N/A	7.62981	0.817844	-6.63371	0.895847	#N/A	#N/A
all-unigene001985	-0.540345	0.875352	2.26801	0.752599	-8.62278	0.507612	-0.828256	0.890841
all-unigene001986	-8.62557	0.530547	-0.0424836	0.909891	0.400278	0.907475	0.486641	0.898554
all-unigene001987	0.627549	0.86642	-9.25253	0.254608	-0.943718	0.890482	-7.56857	0.786059
all-unigene001988	-2.75143	0.52834	-1.62272	0.805002	-0.943718	0.890482	-6.57615	0.867478
all-unigene001989	#N/A	#N/A	#N/A	#N/A	#N/A	#N/A	#N/A	#N/A
all-unigene001990	-1.75662	0.461393	0.153594	0.929265	-0.0341626	0.940293	-1.2059	0.797638
all-unigene001991	-8.96679	0.392082	6.93302	0.877691	#N/A	#N/A	#N/A	#N/A
all-unigene001992	-0.743047	0.873599	11.1303	0.000465706	-1.49006	0.534471	#N/A	#N/A
all-unigene001993	-7.62922	0.739393	#N/A	#N/A	-1.2683	0.854579	-7.56857	0.786059
all-unigene001994	6.67993	0.834342	0.0636946	0.905482	0.174628	0.902526	-0.735774	0.896441
all-unigene001995	#N/A	#N/A	#N/A	#N/A	#N/A	#N/A	#N/A	#N/A
all-unigene001996	-8.59283	0.491836	#N/A	#N/A	#N/A	#N/A	#N/A	#N/A
all-unigene001997	-1.8869	0.795725	7.33634	0.855072	-1.86125	0.833443	8.73016	0.530831
[truncated: 159,540 more rows]
