# Supplementary material for: Comparative Transcriptome Analysis of Leaves and Roots in Response to Sudden Increase in Salinity in Brassica napus by RNA-seq
Source: Biomed Res Int. 2014 Aug 7;2014:467395. doi: 10.1155/2014/467395 (PMC4142189; doi:10.1155/2014/467395)
Supplement: Supplementary file 1 — is primer pair for qRT-PCR analysis. Supplementary file 2 indicates expression fold change of salt responsive gene markers in B. napus. Supplementary file 3 and 4 are tables indicating summary of sequencing output and statistics for the unigene of B. napus assembled by SOAPdenovo, respectively. Supplementary file 5 reveals annotations of all-unigenes. Supplementary file 6 is a graph depicting length distribution of the all-unigenes with SwissProt or NR annotations. Supplementary file 7 and 8 are GO and KEGG ontology classifications of all-unigenes, respectively. Supplementary file 9 shows comparison of transcription factor families between B. napus, Arabidopsis and B. rapa. Supplementary file 10 indicates log2 fold-changes of DEGs in the leaves and the roots at 1h and 12h. Supplementary file 11 shows Venn diagrams depicting number of DEGs regulated in the leaves and the roots of B. napus. Supplementary file 12 shows the result of validation of DEGs by semi-qRT-PCR. Supplementary file 13 shows the comparison of expression fold-change for DEGs between N119 and Kirariboshi. Supplementary file 14 lists all over-represented GO terms in DEGs. Supplementary file 15, 16 and 17 indicate comparison of over-represented GO terms of “Biological Process”, “Molecular Function”, and “Cellular Component”, respectively in the leaves and the roots at 1h and 12h after stress. Supplementary file 18 lists all over-represented KEGG ontology in DEGs. [file 467395.f1.zip › 467395.f1/Additional file 14.xlsx]

## Sheet: 1
Additional file 14.1: Over-represented GO terms in up-regulated DEGs in the leaves at 1 h
Categoty	GO-ID	Description	DEG Frequency	Genome frequency	p-value	Corrected p-value
Biological Process	10200	response to chitin	213 out of 1436 genes, 14.83%	1511 out of 44951 genes, 3.36%	1.132e-76	2.298e-73
Biological Process	9737	response to abscisic acid stimulus	237 out of 1436 genes, 16.50%	2082 out of 44951 genes, 4.63%	4.4865e-67	4.5538e-64
Biological Process	10033	response to organic substance	540 out of 1436 genes, 37.60%	8489 out of 44951 genes, 18.89%	5.5856e-64	3.7796e-61
Biological Process	42538	hyperosmotic salinity response	115 out of 1436 genes, 8.01%	525 out of 44951 genes, 1.17%	1.6579e-61	8.414e-59
Biological Process	9753	response to jasmonic acid stimulus	204 out of 1436 genes, 14.21%	1701 out of 44951 genes, 3.78%	3.8795e-61	1.5751e-58
Biological Process	42221	response to chemical stimulus	668 out of 1436 genes, 46.52%	11984 out of 44951 genes, 26.66%	1.9736e-60	5.7235e-58
Biological Process	9620	response to fungus	206 out of 1436 genes, 14.35%	1764 out of 44951 genes, 3.92%	8.3909e-60	2.1292e-57
Biological Process	9414	response to water deprivation	181 out of 1436 genes, 12.60%	1391 out of 44951 genes, 3.09%	2.0665e-59	4.195e-57
Biological Process	31407	oxylipin metabolic process	104 out of 1436 genes, 7.24%	461 out of 44951 genes, 1.03%	5.5566e-57	9.3999e-55
Biological Process	9611	response to wounding	163 out of 1436 genes, 11.35%	1215 out of 44951 genes, 2.70%	3.1105e-55	4.8572e-53
Biological Process	9719	response to endogenous stimulus	378 out of 1436 genes, 26.32%	5247 out of 44951 genes, 11.67%	1.7706e-54	2.5674e-52
Biological Process	9694	jasmonic acid metabolic process	100 out of 1436 genes, 6.96%	451 out of 44951 genes, 1.00%	4.6081e-54	6.2363e-52
Biological Process	31408	oxylipin biosynthetic process	94 out of 1436 genes, 6.55%	397 out of 44951 genes, 0.88%	1.5189e-53	1.9271e-51
Biological Process	9695	jasmonic acid biosynthetic process	93 out of 1436 genes, 6.48%	390 out of 44951 genes, 0.87%	2.8406e-53	3.392e-51
Biological Process	6950	response to stress	621 out of 1436 genes, 43.25%	11590 out of 44951 genes, 25.78%	2.5971e-48	2.6361e-46
Biological Process	50896	response to stimulus	856 out of 1436 genes, 59.61%	18372 out of 44951 genes, 40.87%	6.4574e-48	5.9584e-46
Biological Process	9867	jasmonic acid mediated signaling pathway	129 out of 1436 genes, 8.98%	1022 out of 44951 genes, 2.27%	8.6976e-41	7.3567e-39
Biological Process	9607	response to biotic stimulus	350 out of 1436 genes, 24.37%	5376 out of 44951 genes, 11.96%	3.7225e-40	2.9064e-38
Biological Process	6970	response to osmotic stress	212 out of 1436 genes, 14.76%	2501 out of 44951 genes, 5.56%	4.0303e-39	2.8212e-37
Biological Process	9751	response to salicylic acid stimulus	166 out of 1436 genes, 11.56%	1684 out of 44951 genes, 3.75%	2.2891e-38	1.499e-36
Biological Process	9723	response to ethylene stimulus	139 out of 1436 genes, 9.68%	1264 out of 44951 genes, 2.81%	3.4e-37	2.1569e-35
Biological Process	50832	defense response to fungus	142 out of 1436 genes, 9.89%	1316 out of 44951 genes, 2.93%	4.4523e-37	2.7388e-35
Biological Process	6952	defense response	297 out of 1436 genes, 20.68%	4536 out of 44951 genes, 10.09%	6.4239e-34	3.5245e-32
Biological Process	51704	multi-organism process	333 out of 1436 genes, 23.19%	5408 out of 44951 genes, 12.03%	3.2381e-33	1.7298e-31
Biological Process	6631	fatty acid metabolic process	164 out of 1436 genes, 11.42%	1833 out of 44951 genes, 4.08%	7.8455e-33	4.0837e-31
Biological Process	46394	carboxylic acid biosynthetic process	245 out of 1436 genes, 17.06%	3573 out of 44951 genes, 7.95%	1.4141e-30	6.3792e-29
Biological Process	50776	regulation of immune response	139 out of 1436 genes, 9.68%	1477 out of 44951 genes, 3.29%	4.7443e-30	2.0491e-28
Biological Process	32787	monocarboxylic acid metabolic process	285 out of 1436 genes, 19.85%	4564 out of 44951 genes, 10.15%	5.2913e-29	2.1921e-27
Biological Process	10363	regulation of plant-type hypersensitive response	124 out of 1436 genes, 8.64%	1257 out of 44951 genes, 2.80%	9.89e-29	4.0154e-27
Biological Process	35556	intracellular signal transduction	156 out of 1436 genes, 10.86%	1847 out of 44951 genes, 4.11%	1.7501e-28	6.8319e-27
Biological Process	9863	salicylic acid mediated signaling pathway	118 out of 1436 genes, 8.22%	1166 out of 44951 genes, 2.59%	2.3547e-28	9.0188e-27
Biological Process	43069	negative regulation of programmed cell death	95 out of 1436 genes, 6.62%	813 out of 44951 genes, 1.81%	1.3069e-27	4.7374e-26
Biological Process	2376	immune system process	199 out of 1436 genes, 13.86%	2845 out of 44951 genes, 6.33%	1.0153e-25	3.4352e-24
Biological Process	48583	regulation of response to stimulus	175 out of 1436 genes, 12.19%	2401 out of 44951 genes, 5.34%	1.5318e-24	5.0155e-23
Biological Process	45730	respiratory burst	65 out of 1436 genes, 4.53%	448 out of 44951 genes, 1.00%	2.3461e-24	7.4414e-23
Biological Process	2679	respiratory burst involved in defense response	65 out of 1436 genes, 4.53%	448 out of 44951 genes, 1.00%	2.3461e-24	7.4414e-23
Biological Process	6612	protein targeting to membrane	121 out of 1436 genes, 8.43%	1375 out of 44951 genes, 3.06%	1.0618e-23	3.3161e-22
Biological Process	34976	response to endoplasmic reticulum stress	106 out of 1436 genes, 7.38%	1121 out of 44951 genes, 2.49%	3.1199e-23	9.4528e-22
Biological Process	6984	ER-nucleus signaling pathway	78 out of 1436 genes, 5.43%	668 out of 44951 genes, 1.49%	7.65e-23	2.2837e-21
Biological Process	23052	signaling	336 out of 1436 genes, 23.40%	6340 out of 44951 genes, 14.10%	6.7536e-22	1.9585e-20
Biological Process	9628	response to abiotic stimulus	386 out of 1436 genes, 26.88%	7664 out of 44951 genes, 17.05%	1.6693e-21	4.7066e-20
Biological Process	9814	defense response, incompatible interaction	131 out of 1436 genes, 9.12%	1670 out of 44951 genes, 3.72%	3.7118e-21	1.0047e-19
Biological Process	6082	organic acid metabolic process	419 out of 1436 genes, 29.18%	8578 out of 44951 genes, 19.08%	4.2998e-21	1.1485e-19
Biological Process	71445	cellular response to protein stimulus	74 out of 1436 genes, 5.15%	662 out of 44951 genes, 1.47%	1.2724e-20	3.1889e-19
Biological Process	7243	intracellular protein kinase cascade	86 out of 1436 genes, 5.99%	862 out of 44951 genes, 1.92%	1.606e-20	3.9759e-19
Biological Process	42180	cellular ketone metabolic process	421 out of 1436 genes, 29.32%	8706 out of 44951 genes, 19.37%	2.1534e-20	5.2666e-19
Biological Process	6986	response to unfolded protein	74 out of 1436 genes, 5.15%	685 out of 44951 genes, 1.52%	9.1209e-20	2.1282e-18
Biological Process	9627	systemic acquired resistance	112 out of 1436 genes, 7.80%	1382 out of 44951 genes, 3.07%	2.958e-19	6.7468e-18
Biological Process	6629	lipid metabolic process	265 out of 1436 genes, 18.45%	4806 out of 44951 genes, 10.69%	3.359e-19	7.5764e-18
Biological Process	43450	alkene biosynthetic process	56 out of 1436 genes, 3.90%	433 out of 44951 genes, 0.96%	8.6207e-19	1.9231e-17
Biological Process	9409	response to cold	133 out of 1436 genes, 9.26%	1947 out of 44951 genes, 4.33%	1.752e-16	3.5925e-15
Biological Process	23060	signal transmission	196 out of 1436 genes, 13.65%	3377 out of 44951 genes, 7.51%	2.3886e-16	4.8008e-15
Biological Process	9873	ethylene mediated signaling pathway	47 out of 1436 genes, 3.27%	376 out of 44951 genes, 0.84%	2.0237e-15	3.9125e-14
Biological Process	44281	small molecule metabolic process	578 out of 1436 genes, 40.25%	14087 out of 44951 genes, 31.34%	2.5876e-13	4.8637e-12
Biological Process	80086	stamen filament development	11 out of 1436 genes, 0.77%	20 out of 44951 genes, 0.04%	4.3896e-12	8.1008e-11
Biological Process	51789	response to protein stimulus	86 out of 1436 genes, 5.99%	1247 out of 44951 genes, 2.77%	2.9584e-11	5.3146e-10
Biological Process	19438	aromatic compound biosynthetic process	117 out of 1436 genes, 8.15%	1930 out of 44951 genes, 4.29%	3.1794e-11	5.6616e-10
Biological Process	52542	defense response by callose deposition	28 out of 1436 genes, 1.95%	197 out of 44951 genes, 0.44%	4.4323e-11	7.7566e-10
Biological Process	9696	salicylic acid metabolic process	60 out of 1436 genes, 4.18%	751 out of 44951 genes, 1.67%	1.2119e-10	2.1028e-09
Biological Process	33036	macromolecule localization	204 out of 1436 genes, 14.21%	4150 out of 44951 genes, 9.23%	3.5272e-10	5.9325e-09
Biological Process	70727	cellular macromolecule localization	163 out of 1436 genes, 11.35%	3115 out of 44951 genes, 6.93%	3.5361e-10	5.9325e-09
Biological Process	9697	salicylic acid biosynthetic process	57 out of 1436 genes, 3.97%	725 out of 44951 genes, 1.61%	6.3977e-10	1.0645e-08
Biological Process	6725	cellular aromatic compound metabolic process	172 out of 1436 genes, 11.98%	3367 out of 44951 genes, 7.49%	6.6169e-10	1.0921e-08
Biological Process	52545	callose localization	35 out of 1436 genes, 2.44%	335 out of 44951 genes, 0.75%	1.0821e-09	1.7434e-08
Biological Process	33037	polysaccharide localization	35 out of 1436 genes, 2.44%	337 out of 44951 genes, 0.75%	1.2677e-09	2.0263e-08
Biological Process	10310	regulation of hydrogen peroxide metabolic process	53 out of 1436 genes, 3.69%	665 out of 44951 genes, 1.48%	1.5856e-09	2.4952e-08
Biological Process	80010	regulation of oxygen and reactive oxygen species metabolic process	53 out of 1436 genes, 3.69%	667 out of 44951 genes, 1.48%	1.7596e-09	2.7477e-08
Biological Process	6555	methionine metabolic process	50 out of 1436 genes, 3.48%	618 out of 44951 genes, 1.37%	2.7889e-09	4.289e-08
Biological Process	19748	secondary metabolic process	145 out of 1436 genes, 10.10%	2778 out of 44951 genes, 6.18%	4.3376e-09	6.6206e-08
Biological Process	9646	response to absence of light	17 out of 1436 genes, 1.18%	92 out of 44951 genes, 0.20%	5.0227e-09	7.609e-08
Biological Process	10286	heat acclimation	30 out of 1436 genes, 2.09%	274 out of 44951 genes, 0.61%	5.5575e-09	8.3569e-08
Biological Process	9555	pollen development	65 out of 1436 genes, 4.53%	944 out of 44951 genes, 2.10%	8.3883e-09	1.2429e-07
Biological Process	9642	response to light intensity	48 out of 1436 genes, 3.34%	647 out of 44951 genes, 1.44%	8.3492e-08	1.2193e-06
Biological Process	48519	negative regulation of biological process	198 out of 1436 genes, 13.79%	4337 out of 44951 genes, 9.65%	1.8185e-07	2.5997e-06
Biological Process	35264	multicellular organism growth	5 out of 1436 genes, 0.35%	7 out of 44951 genes, 0.02%	6.5768e-07	9.0823e-06
Biological Process	9595	detection of biotic stimulus	37 out of 1436 genes, 2.58%	475 out of 44951 genes, 1.06%	7.775e-07	1.0664e-05
Biological Process	16311	dephosphorylation	48 out of 1436 genes, 3.34%	701 out of 44951 genes, 1.56%	8.5615e-07	1.1664e-05
Biological Process	61025	membrane fusion	59 out of 1436 genes, 4.11%	944 out of 44951 genes, 2.10%	1.0219e-06	1.3738e-05
Biological Process	9900	dehiscence	9 out of 1436 genes, 0.63%	36 out of 44951 genes, 0.08%	1.4598e-06	1.9496e-05
Biological Process	9066	aspartate family amino acid metabolic process	58 out of 1436 genes, 4.04%	953 out of 44951 genes, 2.12%	2.8606e-06	3.7708e-05
Biological Process	51641	cellular localization	201 out of 1436 genes, 14.00%	4662 out of 44951 genes, 10.37%	6.7681e-06	8.8072e-05
Biological Process	43900	regulation of multi-organism process	35 out of 1436 genes, 2.44%	487 out of 44951 genes, 1.08%	9.0065e-06	0.00011645
Biological Process	48229	gametophyte development	75 out of 1436 genes, 5.22%	1405 out of 44951 genes, 3.13%	1.2626e-05	0.0001612
Biological Process	9698	phenylpropanoid metabolic process	53 out of 1436 genes, 3.69%	890 out of 44951 genes, 1.98%	1.3773e-05	0.00017475
Biological Process	80024	indolebutyric acid metabolic process	5 out of 1436 genes, 0.35%	13 out of 44951 genes, 0.03%	3.432e-05	0.00042224
Biological Process	9687	abscisic acid metabolic process	14 out of 1436 genes, 0.97%	122 out of 44951 genes, 0.27%	3.7253e-05	0.00045556
Biological Process	43288	apocarotenoid metabolic process	14 out of 1436 genes, 0.97%	123 out of 44951 genes, 0.27%	4.0815e-05	0.00049614
Biological Process	51761	sesquiterpene metabolic process	14 out of 1436 genes, 0.97%	125 out of 44951 genes, 0.28%	4.8845e-05	0.00058671
Biological Process	6714	sesquiterpenoid metabolic process	14 out of 1436 genes, 0.97%	125 out of 44951 genes, 0.28%	4.8845e-05	0.00058671
Biological Process	6810	transport	365 out of 1436 genes, 25.42%	9516 out of 44951 genes, 21.17%	4.952e-05	0.00059133
Biological Process	34440	lipid oxidation	35 out of 1436 genes, 2.44%	539 out of 44951 genes, 1.20%	7.258e-05	0.00086162
Biological Process	51606	detection of stimulus	39 out of 1436 genes, 2.72%	627 out of 44951 genes, 1.39%	7.3042e-05	0.00086207
Biological Process	50794	regulation of cellular process	505 out of 1436 genes, 35.17%	13730 out of 44951 genes, 30.54%	7.4641e-05	0.00087584
Biological Process	51179	localization	388 out of 1436 genes, 27.02%	10278 out of 44951 genes, 22.86%	0.00010257	0.0011898
Biological Process	9308	amine metabolic process	230 out of 1436 genes, 16.02%	5701 out of 44951 genes, 12.68%	0.000106	0.0012226
Biological Process	6862	nucleotide transport	16 out of 1436 genes, 1.11%	170 out of 44951 genes, 0.38%	0.00012099	0.0013876
Biological Process	6979	response to oxidative stress	73 out of 1436 genes, 5.08%	1472 out of 44951 genes, 3.27%	0.00016338	0.0018223
Biological Process	46395	carboxylic acid catabolic process	61 out of 1436 genes, 4.25%	1178 out of 44951 genes, 2.62%	0.00018052	0.0019916
Biological Process	51245	negative regulation of cellular defense response	4 out of 1436 genes, 0.28%	10 out of 44951 genes, 0.02%	0.00018665	0.0020262
Biological Process	50691	regulation of defense response to virus by host	4 out of 1436 genes, 0.28%	10 out of 44951 genes, 0.02%	0.00018665	0.0020262
Biological Process	10117	photoprotection	5 out of 1436 genes, 0.35%	18 out of 44951 genes, 0.04%	0.00019995	0.002159
Biological Process	42214	terpene metabolic process	18 out of 1436 genes, 1.25%	217 out of 44951 genes, 0.48%	0.00023366	0.0025097
Biological Process	9072	aromatic amino acid family metabolic process	47 out of 1436 genes, 3.27%	852 out of 44951 genes, 1.90%	0.00024448	0.0026121
Biological Process	30258	lipid modification	37 out of 1436 genes, 2.58%	630 out of 44951 genes, 1.40%	0.0003374	0.0035488
Biological Process	9682	induced systemic resistance	12 out of 1436 genes, 0.84%	118 out of 44951 genes, 0.26%	0.00040882	0.0042778
Biological Process	35383	thioester metabolic process	6 out of 1436 genes, 0.42%	32 out of 44951 genes, 0.07%	0.00046712	0.0048135
Biological Process	6637	acyl-CoA metabolic process	6 out of 1436 genes, 0.42%	32 out of 44951 genes, 0.07%	0.00046712	0.0048135
Biological Process	31328	positive regulation of cellular biosynthetic process	94 out of 1436 genes, 6.55%	2082 out of 44951 genes, 4.63%	0.00052451	0.0053505
Biological Process	10371	regulation of gibberellin biosynthetic process	4 out of 1436 genes, 0.28%	13 out of 44951 genes, 0.03%	0.00058849	0.0059434
Biological Process	15696	ammonium transport	11 out of 1436 genes, 0.77%	107 out of 44951 genes, 0.24%	0.00064076	0.0064393
Biological Process	44249	cellular biosynthetic process	466 out of 1436 genes, 32.45%	12861 out of 44951 genes, 28.61%	0.00066826	0.0066324
Biological Process	15849	organic acid transport	46 out of 1436 genes, 3.20%	875 out of 44951 genes, 1.95%	0.00078265	0.0076752
Biological Process	46482	para-aminobenzoic acid metabolic process	11 out of 1436 genes, 0.77%	110 out of 44951 genes, 0.24%	0.00080866	0.0078545
Biological Process	15695	organic cation transport	11 out of 1436 genes, 0.77%	111 out of 44951 genes, 0.25%	0.00087213	0.0083907
Biological Process	15866	ADP transport	4 out of 1436 genes, 0.28%	15 out of 44951 genes, 0.03%	0.0010675	0.010179
Biological Process	46942	carboxylic acid transport	45 out of 1436 genes, 3.13%	864 out of 44951 genes, 1.92%	0.001068	0.010179
Biological Process	9058	biosynthetic process	491 out of 1436 genes, 34.19%	13702 out of 44951 genes, 30.48%	0.0011548	0.010955
Biological Process	46483	heterocycle metabolic process	143 out of 1436 genes, 9.96%	3488 out of 44951 genes, 7.76%	0.0012943	0.012164
Biological Process	43455	regulation of secondary metabolic process	32 out of 1436 genes, 2.23%	561 out of 44951 genes, 1.25%	0.0013147	0.012299
Biological Process	9939	positive regulation of gibberellic acid mediated signaling pathway	4 out of 1436 genes, 0.28%	16 out of 44951 genes, 0.04%	0.0013875	0.01292
Biological Process	30639	polyketide biosynthetic process	13 out of 1436 genes, 0.91%	155 out of 44951 genes, 0.34%	0.0014829	0.013621
Biological Process	30636	acetate derivative biosynthetic process	13 out of 1436 genes, 0.91%	155 out of 44951 genes, 0.34%	0.0014829	0.013621
Biological Process	19413	acetate biosynthetic process	13 out of 1436 genes, 0.91%	155 out of 44951 genes, 0.34%	0.0014829	0.013621
Biological Process	30635	acetate derivative metabolic process	13 out of 1436 genes, 0.91%	156 out of 44951 genes, 0.35%	0.0015713	0.014177
Biological Process	30638	polyketide metabolic process	13 out of 1436 genes, 0.91%	156 out of 44951 genes, 0.35%	0.0015713	0.014177
Biological Process	42181	ketone biosynthetic process	13 out of 1436 genes, 0.91%	156 out of 44951 genes, 0.35%	0.0015713	0.014177
Biological Process	19760	glucosinolate metabolic process	32 out of 1436 genes, 2.23%	571 out of 44951 genes, 1.27%	0.0017377	0.015337
Biological Process	16143	S-glycoside metabolic process	32 out of 1436 genes, 2.23%	571 out of 44951 genes, 1.27%	0.0017377	0.015337
Biological Process	15837	amine transport	40 out of 1436 genes, 2.79%	779 out of 44951 genes, 1.73%	0.0025133	0.021347
Biological Process	6083	acetate metabolic process	13 out of 1436 genes, 0.91%	166 out of 44951 genes, 0.37%	0.0027218	0.022832
Biological Process	51865	protein autoubiquitination	9 out of 1436 genes, 0.63%	92 out of 44951 genes, 0.20%	0.0027336	0.022836
Biological Process	9407	toxin catabolic process	32 out of 1436 genes, 2.23%	592 out of 44951 genes, 1.32%	0.0030215	0.024832
Biological Process	10325	raffinose family oligosaccharide biosynthetic process	5 out of 1436 genes, 0.35%	32 out of 44951 genes, 0.07%	0.0032445	0.026558
Biological Process	10583	response to cyclopentenone	20 out of 1436 genes, 1.39%	319 out of 44951 genes, 0.71%	0.0035085	0.028604
Biological Process	10646	regulation of cell communication	36 out of 1436 genes, 2.51%	697 out of 44951 genes, 1.55%	0.0036431	0.029582
Biological Process	15749	monosaccharide transport	6 out of 1436 genes, 0.42%	48 out of 44951 genes, 0.11%	0.0041021	0.032529
Biological Process	16559	peroxisome fission	3 out of 1436 genes, 0.21%	11 out of 44951 genes, 0.02%	0.0044285	0.034431
Biological Process	10149	senescence	24 out of 1436 genes, 1.67%	418 out of 44951 genes, 0.93%	0.0045498	0.034727
Biological Process	10262	somatic embryogenesis	6 out of 1436 genes, 0.42%	49 out of 44951 genes, 0.11%	0.0045504	0.034727
Biological Process	6558	L-phenylalanine metabolic process	15 out of 1436 genes, 1.04%	218 out of 44951 genes, 0.48%	0.0046176	0.035108
Biological Process	10506	regulation of autophagy	4 out of 1436 genes, 0.28%	22 out of 44951 genes, 0.05%	0.0047886	0.03587
Biological Process	15802	basic amino acid transport	11 out of 1436 genes, 0.77%	138 out of 44951 genes, 0.31%	0.0048889	0.036487
Biological Process	46655	folic acid metabolic process	11 out of 1436 genes, 0.77%	139 out of 44951 genes, 0.31%	0.0051597	0.038367
Biological Process	9095	aromatic amino acid family biosynthetic process, prephenate pathway	13 out of 1436 genes, 0.91%	180 out of 44951 genes, 0.40%	0.0054056	0.039759
Biological Process	9094	L-phenylalanine biosynthetic process	13 out of 1436 genes, 0.91%	180 out of 44951 genes, 0.40%	0.0054056	0.039759
Biological Process	15766	disaccharide transport	5 out of 1436 genes, 0.35%	36 out of 44951 genes, 0.08%	0.0054685	0.039916
Biological Process	71435	potassium ion export	2 out of 1436 genes, 0.14%	4 out of 44951 genes, 0.01%	0.0058619	0.042049
Biological Process	61024	membrane organization	69 out of 1436 genes, 4.81%	1582 out of 44951 genes, 3.52%	0.0060677	0.043219
Biological Process	10148	transpiration	5 out of 1436 genes, 0.35%	37 out of 44951 genes, 0.08%	0.0061595	0.043266
Biological Process	6182	cGMP biosynthetic process	5 out of 1436 genes, 0.35%	37 out of 44951 genes, 0.08%	0.0061595	0.043266
Biological Process	46068	cGMP metabolic process	5 out of 1436 genes, 0.35%	37 out of 44951 genes, 0.08%	0.0061595	0.043266
Biological Process	9625	response to insect	18 out of 1436 genes, 1.25%	292 out of 44951 genes, 0.65%	0.0064272	0.044836
Biological Process	10150	leaf senescence	18 out of 1436 genes, 1.25%	294 out of 44951 genes, 0.65%	0.0068782	0.047227
Biological Process	9187	cyclic nucleotide metabolic process	5 out of 1436 genes, 0.35%	38 out of 44951 genes, 0.08%	0.0069095	0.047227
Biological Process	15772	oligosaccharide transport	5 out of 1436 genes, 0.35%	38 out of 44951 genes, 0.08%	0.0069095	0.047227
Biological Process	30148	sphingolipid biosynthetic process	8 out of 1436 genes, 0.56%	88 out of 44951 genes, 0.20%	0.0071684	0.048793
Biological Process	9612	response to mechanical stimulus	15 out of 1436 genes, 1.04%	229 out of 44951 genes, 0.51%	0.0071867	0.048793
Molecular Function	16702	oxidoreductase activity, acting on single donors with incorporation of molecular oxygen, incorporation of two atoms of oxygen	24 out of 1325 genes, 1.81%	107 out of 40938 genes, 0.26%	5.468e-14	4.4346e-11
Molecular Function	51213	dioxygenase activity	26 out of 1325 genes, 1.96%	137 out of 40938 genes, 0.33%	3.2496e-13	1.3177e-10
Molecular Function	16701	oxidoreductase activity, acting on single donors with incorporation of molecular oxygen	24 out of 1325 genes, 1.81%	131 out of 40938 genes, 0.32%	5.7868e-12	1.5644e-09
Molecular Function	4722	protein serine/threonine phosphatase activity	44 out of 1325 genes, 3.32%	531 out of 40938 genes, 1.30%	1.7338e-08	2.8122e-06
Molecular Function	10436	carotenoid dioxygenase activity	7 out of 1325 genes, 0.53%	16 out of 40938 genes, 0.04%	3.2424e-07	3.7566e-05
Molecular Function	45549	9-cis-epoxycarotenoid dioxygenase activity	7 out of 1325 genes, 0.53%	16 out of 40938 genes, 0.04%	3.2424e-07	3.7566e-05
Molecular Function	4721	phosphoprotein phosphatase activity	46 out of 1325 genes, 3.47%	656 out of 40938 genes, 1.60%	1.0478e-06	0.00010622
Molecular Function	5509	calcium ion binding	44 out of 1325 genes, 3.32%	621 out of 40938 genes, 1.52%	1.3599e-06	0.00012254
Molecular Function	45140	inositol phosphoceramide synthase activity	6 out of 1325 genes, 0.45%	13 out of 40938 genes, 0.03%	1.6043e-06	0.00013011
Molecular Function	9975	cyclase activity	9 out of 1325 genes, 0.68%	51 out of 40938 genes, 0.12%	3.3905e-05	0.0024358
Molecular Function	3978	UDP-glucose 4-epimerase activity	8 out of 1325 genes, 0.60%	40 out of 40938 genes, 0.10%	3.6041e-05	0.0024358
Molecular Function	47681	aryl-alcohol dehydrogenase (NADP+) activity	3 out of 1325 genes, 0.23%	4 out of 40938 genes, 0.01%	0.00013205	0.0062994
Molecular Function	46029	mannitol dehydrogenase activity	3 out of 1325 genes, 0.23%	4 out of 40938 genes, 0.01%	0.00013205	0.0062994
Molecular Function	17084	delta1-pyrroline-5-carboxylate synthetase activity	3 out of 1325 genes, 0.23%	4 out of 40938 genes, 0.01%	0.00013205	0.0062994
Molecular Function	17077	oxidative phosphorylation uncoupler activity	6 out of 1325 genes, 0.45%	26 out of 40938 genes, 0.06%	0.00014998	0.0067258
Molecular Function	10295	(+)-abscisic acid 8'-hydroxylase activity	5 out of 1325 genes, 0.38%	17 out of 40938 genes, 0.04%	0.00015757	0.0067258
Molecular Function	4834	tryptophan synthase activity	5 out of 1325 genes, 0.38%	18 out of 40938 genes, 0.04%	0.00021237	0.0086115
Molecular Function	4322	ferroxidase activity	3 out of 1325 genes, 0.23%	5 out of 40938 genes, 0.01%	0.00032213	0.010885
Molecular Function	31320	hexitol dehydrogenase activity	3 out of 1325 genes, 0.23%	5 out of 40938 genes, 0.01%	0.00032213	0.010885
Molecular Function	46423	allene-oxide cyclase activity	3 out of 1325 genes, 0.23%	5 out of 40938 genes, 0.01%	0.00032213	0.010885
Molecular Function	30528	transcription regulator activity	184 out of 1325 genes, 13.89%	4486 out of 40938 genes, 10.96%	0.00044942	0.014579
Molecular Function	16491	oxidoreductase activity	140 out of 1325 genes, 10.57%	3300 out of 40938 genes, 8.06%	0.00061322	0.019128
Molecular Function	42578	phosphoric ester hydrolase activity	57 out of 1325 genes, 4.30%	1144 out of 40938 genes, 2.79%	0.00097322	0.027532
Molecular Function	5522	profilin binding	2 out of 1325 genes, 0.15%	2 out of 40938 genes, 0.00%	0.0010468	0.027532
Molecular Function	43813	phosphatidylinositol-3,5-bisphosphate 5-phosphatase activity	3 out of 1325 genes, 0.23%	7 out of 40938 genes, 0.02%	0.0010737	0.027532
Molecular Function	8146	sulfotransferase activity	9 out of 1325 genes, 0.68%	80 out of 40938 genes, 0.20%	0.0011201	0.027532
Molecular Function	15217	ADP transmembrane transporter activity	4 out of 1325 genes, 0.30%	15 out of 40938 genes, 0.04%	0.0011203	0.027532
Molecular Function	46592	polyamine oxidase activity	4 out of 1325 genes, 0.30%	15 out of 40938 genes, 0.04%	0.0011203	0.027532
Molecular Function	16647	oxidoreductase activity, acting on the CH-NH group of donors, oxygen as acceptor	4 out of 1325 genes, 0.30%	17 out of 40938 genes, 0.04%	0.001855	0.042984
Molecular Function	47364	desulfoglucosinolate sulfotransferase activity	5 out of 1325 genes, 0.38%	29 out of 40938 genes, 0.07%	0.002191	0.049358
Cellular Component	8287	protein serine/threonine phosphatase complex	44 out of 1389 genes, 3.17%	576 out of 45082 genes, 1.28%	4.6129e-08	1.2732e-05
Cellular Component	5667	transcription factor complex	175 out of 1389 genes, 12.60%	4040 out of 45082 genes, 8.96%	2.7383e-06	0.00037788

## Sheet: 2
Additional file 14.2: Over-represented GO terms in down-regulated DEGs in the leaves at 1 h.
Categoty	GO-ID	Description	DEG Frequency	Genome frequency	p-value	Corrected p-value
Biological Process	71417	cellular response to organic nitrogen	6 out of 533 genes, 1.13%	21 out of 44951 genes, 0.05%	1.2607e-07	7.1386e-05
Biological Process	71229	cellular response to acid	6 out of 533 genes, 1.13%	24 out of 44951 genes, 0.05%	3.0339e-07	0.00013744
Biological Process	70208	protein heterotrimerization	4 out of 533 genes, 0.75%	9 out of 44951 genes, 0.02%	2.3494e-06	0.00046364
Biological Process	1775	cell activation	9 out of 533 genes, 1.69%	97 out of 44951 genes, 0.22%	2.4564e-06	0.00046364
Biological Process	1101	response to acid	6 out of 533 genes, 1.13%	34 out of 44951 genes, 0.08%	2.7415e-06	0.00047766
Biological Process	33273	response to vitamin	6 out of 533 genes, 1.13%	37 out of 44951 genes, 0.08%	4.5983e-06	0.00069434
Biological Process	70206	protein trimerization	4 out of 533 genes, 0.75%	15 out of 44951 genes, 0.03%	2.4051e-05	0.0022698
Biological Process	17148	negative regulation of translation	6 out of 533 genes, 1.13%	50 out of 44951 genes, 0.11%	2.759e-05	0.0024035
Biological Process	48519	negative regulation of biological process	81 out of 533 genes, 15.20%	4337 out of 44951 genes, 9.65%	2.9262e-05	0.0024376
Biological Process	51291	protein heterooligomerization	4 out of 533 genes, 0.75%	17 out of 44951 genes, 0.04%	4.1153e-05	0.0029128
Biological Process	9965	leaf morphogenesis	31 out of 533 genes, 5.82%	1222 out of 44951 genes, 2.72%	7.5156e-05	0.0047741
Biological Process	43062	extracellular structure organization	7 out of 533 genes, 1.31%	86 out of 44951 genes, 0.19%	7.588e-05	0.0047741
Biological Process	71260	cellular response to mechanical stimulus	3 out of 533 genes, 0.56%	9 out of 44951 genes, 0.02%	0.00013204	0.0069552
Biological Process	42989	sequestering of actin monomers	2 out of 533 genes, 0.38%	2 out of 44951 genes, 0.00%	0.00014034	0.0070636
Biological Process	6928	cellular component movement	8 out of 533 genes, 1.50%	135 out of 44951 genes, 0.30%	0.00022046	0.0096028
Biological Process	45962	positive regulation of development, heterochronic	5 out of 533 genes, 0.94%	47 out of 44951 genes, 0.10%	0.00023401	0.0099633
Biological Process	31537	regulation of anthocyanin metabolic process	8 out of 533 genes, 1.50%	137 out of 44951 genes, 0.30%	0.00024371	0.010036
Biological Process	51235	maintenance of location	7 out of 533 genes, 1.31%	105 out of 44951 genes, 0.23%	0.00026506	0.010351
Biological Process	44236	multicellular organismal metabolic process	3 out of 533 genes, 0.56%	13 out of 44951 genes, 0.03%	0.00043394	0.013443
Biological Process	32990	cell part morphogenesis	7 out of 533 genes, 1.31%	115 out of 44951 genes, 0.26%	0.00046111	0.013925
Biological Process	55066	di-, tri-valent inorganic cation homeostasis	11 out of 533 genes, 2.06%	279 out of 44951 genes, 0.62%	0.00056001	0.016056
Biological Process	30003	cellular cation homeostasis	14 out of 533 genes, 2.63%	421 out of 44951 genes, 0.94%	0.00058301	0.016507
Biological Process	6424	glutamyl-tRNA aminoacylation	3 out of 533 genes, 0.56%	15 out of 44951 genes, 0.03%	0.00067828	0.018289
Biological Process	3008	system process	8 out of 533 genes, 1.50%	163 out of 44951 genes, 0.36%	0.00077548	0.020073
Biological Process	19371	cyclooxygenase pathway	2 out of 533 genes, 0.38%	4 out of 44951 genes, 0.01%	0.00082881	0.020073
Biological Process	30030	cell projection organization	7 out of 533 genes, 1.31%	127 out of 44951 genes, 0.28%	0.00083305	0.020073
Biological Process	40011	locomotion	8 out of 533 genes, 1.50%	172 out of 44951 genes, 0.38%	0.0010974	0.024611
Biological Process	2250	adaptive immune response	3 out of 533 genes, 0.56%	18 out of 44951 genes, 0.04%	0.0011847	0.026052
Biological Process	50793	regulation of developmental process	54 out of 533 genes, 10.13%	2977 out of 44951 genes, 6.62%	0.001334	0.029053
Biological Process	44087	regulation of cellular component biogenesis	6 out of 533 genes, 1.13%	104 out of 44951 genes, 0.23%	0.0015392	0.031694
Biological Process	45786	negative regulation of cell cycle	6 out of 533 genes, 1.13%	105 out of 44951 genes, 0.23%	0.0016165	0.03269
Biological Process	51348	negative regulation of transferase activity	7 out of 533 genes, 1.31%	145 out of 44951 genes, 0.32%	0.0017951	0.034457
Biological Process	48518	positive regulation of biological process	59 out of 533 genes, 11.07%	3376 out of 44951 genes, 7.51%	0.0018943	0.035755
Biological Process	42127	regulation of cell proliferation	15 out of 533 genes, 2.81%	533 out of 44951 genes, 1.19%	0.0019917	0.036091
Biological Process	1957	intramembranous ossification	2 out of 533 genes, 0.38%	6 out of 44951 genes, 0.01%	0.0020396	0.036091
Biological Process	6521	regulation of cellular amino acid metabolic process	4 out of 533 genes, 0.75%	47 out of 44951 genes, 0.10%	0.0023292	0.039967
Biological Process	32502	developmental process	164 out of 533 genes, 30.77%	11406 out of 44951 genes, 25.37%	0.0027264	0.043604
Biological Process	30005	cellular di-, tri-valent inorganic cation homeostasis	8 out of 533 genes, 1.50%	199 out of 44951 genes, 0.44%	0.0027376	0.043604
Biological Process	51674	localization of cell	5 out of 533 genes, 0.94%	81 out of 44951 genes, 0.18%	0.002813	0.043604
Biological Process	10311	lateral root formation	5 out of 533 genes, 0.94%	81 out of 44951 genes, 0.18%	0.002813	0.043604
Biological Process	71300	cellular response to retinoic acid	2 out of 533 genes, 0.38%	7 out of 44951 genes, 0.02%	0.002833	0.043604
Biological Process	71299	cellular response to vitamin A	2 out of 533 genes, 0.38%	7 out of 44951 genes, 0.02%	0.002833	0.043604
Biological Process	16098	monoterpenoid metabolic process	4 out of 533 genes, 0.75%	50 out of 44951 genes, 0.11%	0.0029247	0.043604
Biological Process	16099	monoterpenoid biosynthetic process	4 out of 533 genes, 0.75%	50 out of 44951 genes, 0.11%	0.0029247	0.043604
Biological Process	51128	regulation of cellular component organization	23 out of 533 genes, 4.32%	1025 out of 44951 genes, 2.28%	0.0029878	0.044074
Biological Process	22621	shoot system development	42 out of 533 genes, 7.88%	2263 out of 44951 genes, 5.03%	0.0030244	0.044074
Biological Process	51259	protein oligomerization	6 out of 533 genes, 1.13%	119 out of 44951 genes, 0.26%	0.0030356	0.044074
Biological Process	6892	post-Golgi vesicle-mediated transport	3 out of 533 genes, 0.56%	25 out of 44951 genes, 0.06%	0.00314	0.045299
Biological Process	9410	response to xenobiotic stimulus	15 out of 533 genes, 2.81%	567 out of 44951 genes, 1.26%	0.0035512	0.049934
Biological Process	10440	stomatal lineage progression	7 out of 533 genes, 1.31%	164 out of 44951 genes, 0.36%	0.0035736	0.049934
Biological Process	51972	regulation of telomerase activity	2 out of 533 genes, 0.38%	8 out of 44951 genes, 0.02%	0.0037478	0.049934
Biological Process	51973	positive regulation of telomerase activity	2 out of 533 genes, 0.38%	8 out of 44951 genes, 0.02%	0.0037478	0.049934
Biological Process	10812	negative regulation of cell-substrate adhesion	2 out of 533 genes, 0.38%	8 out of 44951 genes, 0.02%	0.0037478	0.049934
Biological Process	7605	sensory perception of sound	2 out of 533 genes, 0.38%	8 out of 44951 genes, 0.02%	0.0037478	0.049934
Molecular Function	48407	platelet-derived growth factor binding	5 out of 468 genes, 1.07%	13 out of 40938 genes, 0.03%	2.2808e-07	0.00013503
Molecular Function	5201	extracellular matrix structural constituent	6 out of 468 genes, 1.28%	30 out of 40938 genes, 0.07%	1.0172e-06	0.00030109
Molecular Function	19838	growth factor binding	5 out of 468 genes, 1.07%	27 out of 40938 genes, 0.07%	1.2537e-05	0.0024739
Molecular Function	5515	protein binding	143 out of 468 genes, 30.56%	9451 out of 40938 genes, 23.09%	0.00011211	0.016592
Molecular Function	46332	SMAD binding	3 out of 468 genes, 0.64%	10 out of 40938 genes, 0.02%	0.00016781	0.019869
Molecular Function	3823	antigen binding	3 out of 468 genes, 0.64%	11 out of 40938 genes, 0.03%	0.00022878	0.021638
Molecular Function	42802	identical protein binding	22 out of 468 genes, 4.70%	826 out of 40938 genes, 2.02%	0.00025585	0.021638
Molecular Function	50567	glutaminyl-tRNA synthase (glutamine-hydrolyzing) activity	3 out of 468 genes, 0.64%	12 out of 40938 genes, 0.03%	0.00030245	0.022381
Molecular Function	33550	MAP kinase tyrosine phosphatase activity	2 out of 468 genes, 0.43%	3 out of 40938 genes, 0.01%	0.00038827	0.025539
Molecular Function	4666	prostaglandin-endoperoxide synthase activity	2 out of 468 genes, 0.43%	4 out of 40938 genes, 0.01%	0.00077065	0.045623
Cellular Component	44421	extracellular region part	20 out of 545 genes, 3.67%	253 out of 45082 genes, 0.56%	5.1246e-11	1.6655e-08
Cellular Component	5615	extracellular space	14 out of 545 genes, 2.57%	154 out of 45082 genes, 0.34%	6.7742e-09	1.1008e-06
Cellular Component	31012	extracellular matrix	12 out of 545 genes, 2.20%	122 out of 45082 genes, 0.27%	3.3628e-08	3.6431e-06
Cellular Component	5578	proteinaceous extracellular matrix	9 out of 545 genes, 1.65%	70 out of 45082 genes, 0.16%	1.7455e-07	1.1839e-05
Cellular Component	5583	fibrillar collagen	5 out of 545 genes, 0.92%	15 out of 45082 genes, 0.03%	6.8882e-07	3.7311e-05
Cellular Component	5584	collagen type I	4 out of 545 genes, 0.73%	10 out of 45082 genes, 0.02%	4.1874e-06	0.00017011
Cellular Component	5788	endoplasmic reticulum lumen	7 out of 545 genes, 1.28%	62 out of 45082 genes, 0.14%	1.0051e-05	0.00036296
Cellular Component	8043	intracellular ferritin complex	2 out of 545 genes, 0.37%	3 out of 45082 genes, 0.01%	0.00043413	0.012827
Cellular Component	70288	ferritin complex	2 out of 545 genes, 0.37%	3 out of 45082 genes, 0.01%	0.00043413	0.012827
Cellular Component	19814	immunoglobulin complex	3 out of 545 genes, 0.55%	14 out of 45082 genes, 0.03%	0.00057912	0.015685

## Sheet: 3
Additional file 14.3: Over-represented GO terms in up-regulated DEGs in the leaves at 12 h.
Categoty	GO-ID	Description	DEG Frequency	Genome frequency	p-value	Corrected p-value
Biological Process	6972	hyperosmotic response	28 out of 605 genes, 4.63%	773 out of 44951 genes, 1.72%	2.9456e-06	0.005417
Biological Process	10321	regulation of vegetative phase change	4 out of 605 genes, 0.66%	11 out of 44951 genes, 0.02%	9.9465e-06	0.0091458
Biological Process	9628	response to abiotic stimulus	141 out of 605 genes, 23.31%	7664 out of 44951 genes, 17.05%	4.6043e-05	0.026662
Biological Process	6970	response to osmotic stress	57 out of 605 genes, 9.42%	2501 out of 44951 genes, 5.56%	8.3595e-05	0.026662
Biological Process	9409	response to cold	47 out of 605 genes, 7.77%	1947 out of 44951 genes, 4.33%	9.7016e-05	0.026662
Biological Process	42538	hyperosmotic salinity response	19 out of 605 genes, 3.14%	525 out of 44951 genes, 1.17%	0.00011389	0.026662
Biological Process	15766	disaccharide transport	5 out of 605 genes, 0.83%	36 out of 44951 genes, 0.08%	0.00011599	0.026662
Biological Process	15770	sucrose transport	5 out of 605 genes, 0.83%	36 out of 44951 genes, 0.08%	0.00011599	0.026662
Biological Process	15772	oligosaccharide transport	5 out of 605 genes, 0.83%	38 out of 44951 genes, 0.08%	0.00015105	0.030864
Biological Process	9266	response to temperature stimulus	62 out of 605 genes, 10.25%	2876 out of 44951 genes, 6.40%	0.00018862	0.034688
Biological Process	9737	response to abscisic acid stimulus	48 out of 605 genes, 7.93%	2082 out of 44951 genes, 4.63%	0.0002366	0.039556
Molecualr Function	30613	oxidoreductase activity, acting on phosphorus or arsenic in donors	5 out of 569 genes, 0.88%	21 out of 40938 genes, 0.05%	8.6271e-06	0.0015728
Molecualr Function	30614	oxidoreductase activity, acting on phosphorus or arsenic in donors, with disulfide as acceptor	5 out of 569 genes, 0.88%	21 out of 40938 genes, 0.05%	8.6271e-06	0.0015728
Molecualr Function	8794	arsenate reductase (glutaredoxin) activity	5 out of 569 genes, 0.88%	21 out of 40938 genes, 0.05%	8.6271e-06	0.0015728
Molecualr Function	30611	arsenate reductase activity	5 out of 569 genes, 0.88%	22 out of 40938 genes, 0.05%	1.1037e-05	0.0015728
Molecualr Function	15154	disaccharide transmembrane transporter activity	5 out of 569 genes, 0.88%	36 out of 40938 genes, 0.09%	0.00013458	0.012785
Molecualr Function	8515	sucrose transmembrane transporter activity	5 out of 569 genes, 0.88%	36 out of 40938 genes, 0.09%	0.00013458	0.012785
Molecualr Function	5515	protein binding	167 out of 569 genes, 29.35%	9451 out of 40938 genes, 23.09%	0.00029831	0.024291
Cellular Component	5634	nucleus	262 out of 619 genes, 42.33%	15261 out of 45082 genes, 33.85%	6.1051e-06	0.0015751

## Sheet: 4
Additional file 14.4: Over-represented GO terms in down-regulated DEGs in the leaves at 12 h.
Categoty	GO-ID	Description	DEG Frequency	Genome frequency	p-value	Corrected p-value
Biological Process	45730	respiratory burst	27 out of 657 genes, 4.11%	448 out of 44951 genes, 1.00%	8.4882e-10	7.5715e-07
Biological Process	2679	respiratory burst involved in defense response	27 out of 657 genes, 4.11%	448 out of 44951 genes, 1.00%	8.4882e-10	7.5715e-07
Biological Process	9743	response to carbohydrate stimulus	77 out of 657 genes, 11.72%	2562 out of 44951 genes, 5.70%	2.0273e-09	9.8312e-07
Biological Process	10200	response to chitin	54 out of 657 genes, 8.22%	1511 out of 44951 genes, 3.36%	2.2043e-09	9.8312e-07
Biological Process	9693	ethylene biosynthetic process	18 out of 657 genes, 2.74%	306 out of 44951 genes, 0.68%	7.77e-07	0.00023103
Biological Process	2252	immune effector process	33 out of 657 genes, 5.02%	943 out of 44951 genes, 2.10%	4.8311e-06	0.0012312
Biological Process	80001	mucilage extrusion from seed coat	7 out of 657 genes, 1.07%	56 out of 44951 genes, 0.12%	1.7204e-05	0.0027902
Biological Process	9612	response to mechanical stimulus	13 out of 657 genes, 1.98%	229 out of 44951 genes, 0.51%	3.7638e-05	0.0055955
Biological Process	50832	defense response to fungus	38 out of 657 genes, 5.78%	1316 out of 44951 genes, 2.93%	6.7429e-05	0.0092533
Biological Process	48359	mucilage metabolic process involved seed coat development	7 out of 657 genes, 1.07%	74 out of 44951 genes, 0.16%	0.00010643	0.013562
Biological Process	9620	response to fungus	46 out of 657 genes, 7.00%	1764 out of 44951 genes, 3.92%	0.00013224	0.015728
Biological Process	10191	mucilage metabolic process	7 out of 657 genes, 1.07%	80 out of 44951 genes, 0.18%	0.00017423	0.019427
Biological Process	35556	intracellular signal transduction	47 out of 657 genes, 7.15%	1847 out of 44951 genes, 4.11%	0.00019516	0.020481
Biological Process	42180	cellular ketone metabolic process	164 out of 657 genes, 24.96%	8706 out of 44951 genes, 19.37%	0.0002312	0.022914
Biological Process	44283	small molecule biosynthetic process	119 out of 657 genes, 18.11%	6009 out of 44951 genes, 13.37%	0.00032985	0.030972
Biological Process	6952	defense response	94 out of 657 genes, 14.31%	4536 out of 44951 genes, 10.09%	0.00035763	0.031129
Biological Process	96	sulfur amino acid metabolic process	32 out of 657 genes, 4.87%	1140 out of 44951 genes, 2.54%	0.00040451	0.031129
Biological Process	19752	carboxylic acid metabolic process	160 out of 657 genes, 24.35%	8566 out of 44951 genes, 19.06%	0.00042337	0.031129
Biological Process	6082	organic acid metabolic process	160 out of 657 genes, 24.35%	8578 out of 44951 genes, 19.08%	0.00045184	0.031129
Biological Process	6949	syncytium formation	5 out of 657 genes, 0.76%	45 out of 44951 genes, 0.10%	0.00049514	0.031129
Biological Process	19497	hexachlorocyclohexane metabolic process	7 out of 657 genes, 1.07%	95 out of 44951 genes, 0.21%	0.00050225	0.031129
Biological Process	9738	abscisic acid mediated signaling pathway	25 out of 657 genes, 3.81%	817 out of 44951 genes, 1.82%	0.00050602	0.031129
Biological Process	90355	positive regulation of auxin metabolic process	2 out of 657 genes, 0.30%	3 out of 44951 genes, 0.01%	0.0006337	0.03325
Biological Process	90358	positive regulation of tryptophan metabolic process	2 out of 657 genes, 0.30%	3 out of 44951 genes, 0.01%	0.0006337	0.03325
Biological Process	9828	plant-type cell wall loosening	5 out of 657 genes, 0.76%	48 out of 44951 genes, 0.11%	0.00066943	0.034122
Molecular Function	22892	substrate-specific transporter activity	65 out of 585 genes, 11.11%	2687 out of 40938 genes, 6.56%	2.539e-05	0.0091178
Molecular Function	46943	carboxylic acid transmembrane transporter activity	14 out of 585 genes, 2.39%	269 out of 40938 genes, 0.66%	3.8604e-05	0.0091178
Molecular Function	22891	substrate-specific transmembrane transporter activity	58 out of 585 genes, 9.91%	2379 out of 40938 genes, 5.81%	5.7485e-05	0.0091178
Molecular Function	5342	organic acid transmembrane transporter activity	14 out of 585 genes, 2.39%	280 out of 40938 genes, 0.68%	5.9496e-05	0.0091178
Molecular Function	4252	serine-type endopeptidase activity	9 out of 585 genes, 1.54%	145 out of 40938 genes, 0.35%	0.00025387	0.025937
Molecular Function	5215	transporter activity	75 out of 585 genes, 12.82%	3565 out of 40938 genes, 8.71%	0.00048955	0.036633
Molecular Function	3993	acid phosphatase activity	7 out of 585 genes, 1.20%	99 out of 40938 genes, 0.24%	0.00056256	0.036633
Molecular Function	16810	hydrolase activity, acting on carbon-nitrogen (but not peptide) bonds	10 out of 585 genes, 1.71%	199 out of 40938 genes, 0.49%	0.00063241	0.036633
Molecular Function	5275	amine transmembrane transporter activity	10 out of 585 genes, 1.71%	200 out of 40938 genes, 0.49%	0.00065737	0.036633
Cellular Component	5576	extracellular region	84 out of 672 genes, 12.50%	3280 out of 45082 genes, 7.28%	9.457e-07	0.0002298

## Sheet: 5
Additional file 14.5: Over-represented GO terms in up-regulated DEGs in the roots at 1 h.
Categoty	GO-ID	Description	DEG Frequency	Genome frequency	p-value	Corrected p-value
Biological Process	9414	response to water deprivation	91 out of 1057 genes, 8.61%	1391 out of 44951 genes, 3.09%	2.4876e-18	2.5846e-15
Biological Process	9737	response to abscisic acid stimulus	112 out of 1057 genes, 10.60%	2082 out of 44951 genes, 4.63%	4.2556e-16	1.7686e-13
Biological Process	42221	response to chemical stimulus	394 out of 1057 genes, 37.28%	11984 out of 44951 genes, 26.66%	1.434e-14	4.9666e-12
Biological Process	42538	hyperosmotic salinity response	46 out of 1057 genes, 4.35%	525 out of 44951 genes, 1.17%	3.3004e-14	9.7976e-12
Biological Process	10033	response to organic substance	299 out of 1057 genes, 28.29%	8489 out of 44951 genes, 18.89%	3.8448e-14	9.9869e-12
Biological Process	9719	response to endogenous stimulus	199 out of 1057 genes, 18.83%	5247 out of 44951 genes, 11.67%	5.4814e-12	1.2656e-09
Biological Process	10200	response to chitin	77 out of 1057 genes, 7.28%	1511 out of 44951 genes, 3.36%	2.7094e-10	4.6917e-08
Biological Process	50896	response to stimulus	523 out of 1057 genes, 49.48%	18372 out of 44951 genes, 40.87%	6.5116e-09	9.0208e-07
Biological Process	6970	response to osmotic stress	105 out of 1057 genes, 9.93%	2501 out of 44951 genes, 5.56%	7.7273e-09	1.0036e-06
Biological Process	9620	response to fungus	81 out of 1057 genes, 7.66%	1764 out of 44951 genes, 3.92%	1.0578e-08	1.2931e-06
Biological Process	10583	response to cyclopentenone	26 out of 1057 genes, 2.46%	319 out of 44951 genes, 0.71%	5.2992e-08	5.5059e-06
Biological Process	6950	response to stress	343 out of 1057 genes, 32.45%	11590 out of 44951 genes, 25.78%	5.7372e-07	4.9674e-05
Biological Process	31407	oxylipin metabolic process	30 out of 1057 genes, 2.84%	461 out of 44951 genes, 1.03%	7.1099e-07	5.9097e-05
Biological Process	9404	toxin metabolic process	35 out of 1057 genes, 3.31%	592 out of 44951 genes, 1.32%	8.2687e-07	6.3639e-05
Biological Process	9407	toxin catabolic process	35 out of 1057 genes, 3.31%	592 out of 44951 genes, 1.32%	8.2687e-07	6.3639e-05
Biological Process	9611	response to wounding	57 out of 1057 genes, 5.39%	1215 out of 44951 genes, 2.70%	8.6275e-07	6.4029e-05
Biological Process	9723	response to ethylene stimulus	58 out of 1057 genes, 5.49%	1264 out of 44951 genes, 2.81%	1.3858e-06	9.9303e-05
Biological Process	9753	response to jasmonic acid stimulus	71 out of 1057 genes, 6.72%	1701 out of 44951 genes, 3.78%	2.8075e-06	0.00018231
Biological Process	31408	oxylipin biosynthetic process	26 out of 1057 genes, 2.46%	397 out of 44951 genes, 0.88%	3.4175e-06	0.0002152
Biological Process	9694	jasmonic acid metabolic process	28 out of 1057 genes, 2.65%	451 out of 44951 genes, 1.00%	4.0567e-06	0.00024794
Biological Process	50832	defense response to fungus	58 out of 1057 genes, 5.49%	1316 out of 44951 genes, 2.93%	4.7275e-06	0.00028068
Biological Process	9695	jasmonic acid biosynthetic process	25 out of 1057 genes, 2.37%	390 out of 44951 genes, 0.87%	7.5771e-06	0.00043736
Biological Process	9607	response to biotic stimulus	173 out of 1057 genes, 16.37%	5376 out of 44951 genes, 11.96%	1.1406e-05	0.00062374
Biological Process	9628	response to abiotic stimulus	233 out of 1057 genes, 22.04%	7664 out of 44951 genes, 17.05%	1.3815e-05	0.00073607
Biological Process	6518	peptide metabolic process	20 out of 1057 genes, 1.89%	292 out of 44951 genes, 0.65%	2.3528e-05	0.0010678
Biological Process	9409	response to cold	75 out of 1057 genes, 7.10%	1947 out of 44951 genes, 4.33%	2.3637e-05	0.0010678
Biological Process	45730	respiratory burst	26 out of 1057 genes, 2.46%	448 out of 44951 genes, 1.00%	2.8196e-05	0.0011957
Biological Process	2679	respiratory burst involved in defense response	26 out of 1057 genes, 2.46%	448 out of 44951 genes, 1.00%	2.8196e-05	0.0011957
Biological Process	34976	response to endoplasmic reticulum stress	49 out of 1057 genes, 4.64%	1121 out of 44951 genes, 2.49%	3.1385e-05	0.0013044
Biological Process	6986	response to unfolded protein	34 out of 1057 genes, 3.22%	685 out of 44951 genes, 1.52%	4.5959e-05	0.0018726
Biological Process	48583	regulation of response to stimulus	87 out of 1057 genes, 8.23%	2401 out of 44951 genes, 5.34%	4.8738e-05	0.0019476
Biological Process	6030	chitin metabolic process	7 out of 1057 genes, 0.66%	42 out of 44951 genes, 0.09%	5.1254e-05	0.0020096
Biological Process	34293	sexual sporulation	4 out of 1057 genes, 0.38%	10 out of 44951 genes, 0.02%	5.701e-05	0.0020425
Biological Process	9751	response to salicylic acid stimulus	65 out of 1057 genes, 6.15%	1684 out of 44951 genes, 3.75%	7.7693e-05	0.0027364
Biological Process	31347	regulation of defense response	69 out of 1057 genes, 6.53%	1836 out of 44951 genes, 4.08%	0.0001041	0.003489
Biological Process	9867	jasmonic acid mediated signaling pathway	44 out of 1057 genes, 4.16%	1022 out of 44951 genes, 2.27%	0.00010979	0.0036212
Biological Process	43934	sporulation	4 out of 1057 genes, 0.38%	14 out of 44951 genes, 0.03%	0.00025205	0.007377
Biological Process	9405	pathogenesis	4 out of 1057 genes, 0.38%	14 out of 44951 genes, 0.03%	0.00025205	0.007377
Biological Process	71445	cellular response to protein stimulus	31 out of 1057 genes, 2.93%	662 out of 44951 genes, 1.47%	0.00027026	0.0075892
Biological Process	9863	salicylic acid mediated signaling pathway	47 out of 1057 genes, 4.45%	1166 out of 44951 genes, 2.59%	0.00029112	0.00796
Biological Process	6984	ER-nucleus signaling pathway	31 out of 1057 genes, 2.93%	668 out of 44951 genes, 1.49%	0.00031505	0.0085023
Biological Process	60548	negative regulation of cell death	37 out of 1057 genes, 3.50%	853 out of 44951 genes, 1.90%	0.00032519	0.0086634
Biological Process	6979	response to oxidative stress	56 out of 1057 genes, 5.30%	1472 out of 44951 genes, 3.27%	0.00034063	0.0089598
Biological Process	2682	regulation of immune system process	56 out of 1057 genes, 5.30%	1496 out of 44951 genes, 3.33%	0.00050123	0.012549
Biological Process	9205	purine ribonucleoside triphosphate metabolic process	34 out of 1057 genes, 3.22%	781 out of 44951 genes, 1.74%	0.0005227	0.012778
Biological Process	9064	glutamine family amino acid metabolic process	19 out of 1057 genes, 1.80%	341 out of 44951 genes, 0.76%	0.00052963	0.012797
Biological Process	6616	SRP-dependent cotranslational protein targeting to membrane, translocation	2 out of 1057 genes, 0.19%	2 out of 44951 genes, 0.00%	0.00055242	0.013045
Biological Process	51704	multi-organism process	162 out of 1057 genes, 15.33%	5408 out of 44951 genes, 12.03%	0.00072551	0.014496
Biological Process	16998	cell wall macromolecule catabolic process	7 out of 1057 genes, 0.66%	65 out of 44951 genes, 0.14%	0.00082872	0.016094
Biological Process	9828	plant-type cell wall loosening	6 out of 1057 genes, 0.57%	48 out of 44951 genes, 0.11%	0.00088075	0.016946
Biological Process	7243	intracellular protein kinase cascade	35 out of 1057 genes, 3.31%	862 out of 44951 genes, 1.92%	0.0014539	0.02627
Biological Process	9642	response to light intensity	28 out of 1057 genes, 2.65%	647 out of 44951 genes, 1.44%	0.001694	0.029602
Biological Process	7585	respiratory gaseous exchange	3 out of 1057 genes, 0.28%	11 out of 44951 genes, 0.02%	0.0018574	0.032163
Biological Process	9627	systemic acquired resistance	50 out of 1057 genes, 4.73%	1382 out of 44951 genes, 3.07%	0.0019784	0.033424
Biological Process	70726	cell wall assembly	4 out of 1057 genes, 0.38%	24 out of 44951 genes, 0.05%	0.0022193	0.036313
Biological Process	10363	regulation of plant-type hypersensitive response	46 out of 1057 genes, 4.35%	1257 out of 44951 genes, 2.80%	0.0023662	0.038307
Biological Process	30522	intracellular receptor mediated signaling pathway	6 out of 1057 genes, 0.57%	58 out of 44951 genes, 0.13%	0.0023826	0.038307
Biological Process	32787	monocarboxylic acid metabolic process	136 out of 1057 genes, 12.87%	4564 out of 44951 genes, 10.15%	0.0024201	0.038307
Biological Process	10244	response to low fluence blue light stimulus by blue low-fluence system	3 out of 1057 genes, 0.28%	12 out of 44951 genes, 0.03%	0.0024333	0.038307
Biological Process	46677	response to antibiotic	3 out of 1057 genes, 0.28%	12 out of 44951 genes, 0.03%	0.0024333	0.038307
Biological Process	51762	sesquiterpene biosynthetic process	8 out of 1057 genes, 0.76%	100 out of 44951 genes, 0.22%	0.0025238	0.038847
Biological Process	16106	sesquiterpenoid biosynthetic process	8 out of 1057 genes, 0.76%	100 out of 44951 genes, 0.22%	0.0025238	0.038847
Biological Process	6631	fatty acid metabolic process	62 out of 1057 genes, 5.87%	1833 out of 44951 genes, 4.08%	0.0029549	0.045149
Biological Process	51156	glucose 6-phosphate metabolic process	2 out of 1057 genes, 0.19%	4 out of 44951 genes, 0.01%	0.0032117	0.047441
Biological Process	51789	response to protein stimulus	45 out of 1057 genes, 4.26%	1247 out of 44951 genes, 2.77%	0.0033869	0.049564
Molecular Function	10436	carotenoid dioxygenase activity	7 out of 944 genes, 0.74%	16 out of 40938 genes, 0.04%	3.2351e-08	1.0644e-05
Molecular Function	45549	9-cis-epoxycarotenoid dioxygenase activity	7 out of 944 genes, 0.74%	16 out of 40938 genes, 0.04%	3.2351e-08	1.0644e-05
Molecular Function	51213	dioxygenase activity	15 out of 944 genes, 1.59%	137 out of 40938 genes, 0.33%	7.0706e-07	0.00015508
Molecular Function	16702	oxidoreductase activity, acting on single donors with incorporation of molecular oxygen, incorporation of two atoms of oxygen	13 out of 944 genes, 1.38%	107 out of 40938 genes, 0.26%	1.1808e-06	0.00019425
Molecular Function	16491	oxidoreductase activity	115 out of 944 genes, 12.18%	3300 out of 40938 genes, 8.06%	6.1695e-06	0.0008119
Molecular Function	16701	oxidoreductase activity, acting on single donors with incorporation of molecular oxygen	13 out of 944 genes, 1.38%	131 out of 40938 genes, 0.32%	1.1406e-05	0.0012509
Molecular Function	4364	glutathione transferase activity	13 out of 944 genes, 1.38%	156 out of 40938 genes, 0.38%	7.2243e-05	0.0067003
Molecular Function	47893	flavonol 3-O-glucosyltransferase activity	4 out of 944 genes, 0.42%	11 out of 40938 genes, 0.03%	8.1462e-05	0.0067003
Molecular Function	8553	hydrogen-exporting ATPase activity, phosphorylative mechanism	6 out of 944 genes, 0.64%	33 out of 40938 genes, 0.08%	9.6232e-05	0.0070357
Molecular Function	80044	quercetin 7-O-glucosyltransferase activity	8 out of 944 genes, 0.85%	72 out of 40938 genes, 0.18%	0.00025238	0.016606
Molecular Function	8194	UDP-glycosyltransferase activity	35 out of 944 genes, 3.71%	826 out of 40938 genes, 2.02%	0.00049241	0.029455
Molecular Function	4612	phosphoenolpyruvate carboxykinase (ATP) activity	3 out of 944 genes, 0.32%	8 out of 40938 genes, 0.02%	0.00062762	0.034415
Molecular Function	16682	oxidoreductase activity, acting on diphenols and related substances as donors, oxygen as acceptor	5 out of 944 genes, 0.53%	32 out of 40938 genes, 0.08%	0.00077455	0.039204
Molecular Function	3844	1,4-alpha-glucan branching enzyme activity	3 out of 944 genes, 0.32%	9 out of 40938 genes, 0.02%	0.0009253	0.042533
Molecular Function	43424	protein histidine kinase binding	9 out of 944 genes, 0.95%	109 out of 40938 genes, 0.27%	0.00096959	0.042533
Cellular Component	30479	actin cortical patch	4 out of 980 genes, 0.41%	8 out of 45082 genes, 0.02%	1.449e-05	0.0047672
Cellular Component	5628	prospore membrane	3 out of 980 genes, 0.31%	7 out of 45082 genes, 0.02%	0.00033575	0.027615
Cellular Component	34099	luminal surveillance complex	2 out of 980 genes, 0.20%	2 out of 45082 genes, 0.00%	0.00047208	0.031063

## Sheet: 6
Additional file 14.6: Over-represented GO terms in down-regulated DEGs in the roots at 1 h.
Categoty	GO-ID	Description	DEG Frequency	Genome frequency	p-value	Corrected p-value
Biological Process	15721	bile acid and bile salt transport	5 out of 612 genes, 0.82%	24 out of 44951 genes, 0.05%	1.5789e-05	0.020674
Biological Process	71497	cellular response to freezing	4 out of 612 genes, 0.65%	13 out of 44951 genes, 0.03%	2.2064e-05	0.020674
Molecular Function	15125	bile acid transmembrane transporter activity	5 out of 549 genes, 0.91%	23 out of 40938 genes, 0.06%	1.1737e-05	0.0029861
Molecular Function	8508	bile acid:sodium symporter activity	5 out of 549 genes, 0.91%	23 out of 40938 genes, 0.06%	1.1737e-05	0.0029861
Molecular Function	5343	organic acid:sodium symporter activity	5 out of 549 genes, 0.91%	24 out of 40938 genes, 0.06%	1.4662e-05	0.0029861
Molecular Function	8028	monocarboxylic acid transmembrane transporter activity	5 out of 549 genes, 0.91%	28 out of 40938 genes, 0.07%	3.2434e-05	0.0043865
Molecular Function	15081	sodium ion transmembrane transporter activity	7 out of 549 genes, 1.28%	68 out of 40938 genes, 0.17%	3.5896e-05	0.0043865
Molecular Function	15370	solute:sodium symporter activity	5 out of 549 genes, 0.91%	34 out of 40938 genes, 0.08%	8.5939e-05	0.0087514

## Sheet: 7
Additional file 14.7: Over-represented GO terms in up-regulated DEGs in the roots at 12 h.
Categoty	GO-ID	Description	DEG Frequency	Genome frequency	p-value	Corrected p-value
Biological Process	6415	translational termination	47 out of 972 genes, 4.84%	105 out of 44951 genes, 0.23%	9.9498e-50	8.988e-47
Biological Process	184	nuclear-transcribed mRNA catabolic process, nonsense-mediated decay	47 out of 972 genes, 4.84%	123 out of 44951 genes, 0.27%	9.6515e-46	5.2311e-43
Biological Process	6614	SRP-dependent cotranslational protein targeting to membrane	47 out of 972 genes, 4.84%	129 out of 44951 genes, 0.29%	1.3872e-44	5.3706e-42
Biological Process	6413	translational initiation	45 out of 972 genes, 4.63%	120 out of 44951 genes, 0.27%	2.0903e-43	6.2941e-41
Biological Process	6414	translational elongation	47 out of 972 genes, 4.84%	154 out of 44951 genes, 0.34%	2.0053e-40	3.3965e-38
Biological Process	22411	cellular component disassembly	49 out of 972 genes, 5.04%	231 out of 44951 genes, 0.51%	8.4426e-34	1.2711e-31
Biological Process	6401	RNA catabolic process	56 out of 972 genes, 5.76%	525 out of 44951 genes, 1.17%	1.2193e-22	1.5734e-20
Biological Process	16071	mRNA metabolic process	69 out of 972 genes, 7.10%	1209 out of 44951 genes, 2.69%	4.3736e-13	4.741e-11
Biological Process	6412	translation	73 out of 972 genes, 7.51%	1367 out of 44951 genes, 3.04%	2.1774e-12	2.1074e-10
Biological Process	42254	ribosome biogenesis	80 out of 972 genes, 8.23%	1604 out of 44951 genes, 3.57%	5.7162e-12	5.3417e-10
Biological Process	1775	cell activation	17 out of 972 genes, 1.75%	97 out of 44951 genes, 0.22%	3.2219e-11	2.8165e-09
Biological Process	43933	macromolecular complex subunit organization	84 out of 972 genes, 8.64%	1797 out of 44951 genes, 4.00%	4.3596e-11	3.692e-09
Biological Process	42060	wound healing	15 out of 972 genes, 1.54%	91 out of 44951 genes, 0.20%	1.1292e-09	9e-08
Biological Process	14866	skeletal myofibril assembly	6 out of 972 genes, 0.62%	8 out of 44951 genes, 0.02%	2.7165e-09	2.0449e-07
Biological Process	3008	system process	19 out of 972 genes, 1.95%	163 out of 44951 genes, 0.36%	3.099e-09	2.2698e-07
Biological Process	6425	glutaminyl-tRNA aminoacylation	5 out of 972 genes, 0.51%	5 out of 44951 genes, 0.01%	4.6801e-09	3.2521e-07
Biological Process	6928	cellular component movement	17 out of 972 genes, 1.75%	135 out of 44951 genes, 0.30%	6.3953e-09	4.2995e-07
Biological Process	50878	regulation of body fluid levels	14 out of 972 genes, 1.44%	88 out of 44951 genes, 0.20%	6.5048e-09	4.2995e-07
Biological Process	9057	macromolecule catabolic process	96 out of 972 genes, 9.88%	2446 out of 44951 genes, 5.44%	1.5423e-08	9.2878e-07
Biological Process	32990	cell part morphogenesis	15 out of 972 genes, 1.54%	115 out of 44951 genes, 0.26%	3.0506e-08	1.5309e-06
Biological Process	85029	extracellular matrix assembly	5 out of 972 genes, 0.51%	7 out of 44951 genes, 0.02%	9.4791e-08	4.1433e-06
Biological Process	30030	cell projection organization	15 out of 972 genes, 1.54%	127 out of 44951 genes, 0.28%	1.1679e-07	5.0238e-06
Biological Process	42273	ribosomal large subunit biogenesis	6 out of 972 genes, 0.62%	13 out of 44951 genes, 0.03%	1.5172e-07	6.4244e-06
Biological Process	70482	response to oxygen levels	23 out of 972 genes, 2.37%	326 out of 44951 genes, 0.73%	9.0374e-07	3.4495e-05
Biological Process	34097	response to cytokine stimulus	7 out of 972 genes, 0.72%	27 out of 44951 genes, 0.06%	1.3166e-06	4.9013e-05
Biological Process	9056	catabolic process	200 out of 972 genes, 20.58%	6744 out of 44951 genes, 15.00%	1.4643e-06	5.3598e-05
Biological Process	43062	extracellular structure organization	11 out of 972 genes, 1.13%	86 out of 44951 genes, 0.19%	2.552e-06	8.8667e-05
Biological Process	45333	cellular respiration	29 out of 972 genes, 2.98%	510 out of 44951 genes, 1.13%	3.0186e-06	0.00010225
Biological Process	9611	response to wounding	52 out of 972 genes, 5.35%	1215 out of 44951 genes, 2.70%	3.2417e-06	0.00010846
Biological Process	42221	response to chemical stimulus	322 out of 972 genes, 33.13%	11984 out of 44951 genes, 26.66%	3.7709e-06	0.00012462
Biological Process	6091	generation of precursor metabolites and energy	75 out of 972 genes, 7.72%	2044 out of 44951 genes, 4.55%	7.0683e-06	0.0002105
Biological Process	50794	regulation of cellular process	360 out of 972 genes, 37.04%	13730 out of 44951 genes, 30.54%	7.2161e-06	0.00021098
Biological Process	70727	cellular macromolecule localization	104 out of 972 genes, 10.70%	3115 out of 44951 genes, 6.93%	7.6594e-06	0.0002185
Biological Process	6524	alanine catabolic process	3 out of 972 genes, 0.31%	3 out of 44951 genes, 0.01%	1.008e-05	0.00026267
Biological Process	51248	negative regulation of protein metabolic process	12 out of 972 genes, 1.23%	118 out of 44951 genes, 0.26%	1.0227e-05	0.00026394
Biological Process	80021	response to benzoic acid stimulus	4 out of 972 genes, 0.41%	8 out of 44951 genes, 0.02%	1.4191e-05	0.00035942
Biological Process	90046	regulation of transcription regulator activity	7 out of 972 genes, 0.72%	39 out of 44951 genes, 0.09%	1.8193e-05	0.00044417
Biological Process	51098	regulation of binding	9 out of 972 genes, 0.93%	71 out of 44951 genes, 0.16%	2.2351e-05	0.00053134
Biological Process	2250	adaptive immune response	5 out of 972 genes, 0.51%	18 out of 44951 genes, 0.04%	3.1718e-05	0.00072844
Biological Process	19371	cyclooxygenase pathway	3 out of 972 genes, 0.31%	4 out of 44951 genes, 0.01%	3.9669e-05	0.00089585
Biological Process	51101	regulation of DNA binding	7 out of 972 genes, 0.72%	45 out of 44951 genes, 0.10%	4.7961e-05	0.0010567
Biological Process	10467	gene expression	128 out of 972 genes, 13.17%	4203 out of 44951 genes, 9.35%	5.0939e-05	0.0011133
Biological Process	44248	cellular catabolic process	150 out of 972 genes, 15.43%	5115 out of 44951 genes, 11.38%	6.9239e-05	0.0014892
Biological Process	10033	response to organic substance	231 out of 972 genes, 23.77%	8489 out of 44951 genes, 18.89%	7.6706e-05	0.001624
Biological Process	6096	glycolysis	31 out of 972 genes, 3.19%	674 out of 44951 genes, 1.50%	8.565e-05	0.0017993
Biological Process	2443	leukocyte mediated immunity	5 out of 972 genes, 0.51%	22 out of 44951 genes, 0.05%	9.0731e-05	0.0018621
Biological Process	51641	cellular localization	138 out of 972 genes, 14.20%	4662 out of 44951 genes, 10.37%	9.2979e-05	0.0018621
Biological Process	16070	RNA metabolic process	120 out of 972 genes, 12.35%	3947 out of 44951 genes, 8.78%	9.6036e-05	0.0018621
Biological Process	48583	regulation of response to stimulus	80 out of 972 genes, 8.23%	2401 out of 44951 genes, 5.34%	9.6245e-05	0.0018621
Biological Process	2755	MyD88-dependent toll-like receptor signaling pathway	3 out of 972 genes, 0.31%	5 out of 44951 genes, 0.01%	9.757e-05	0.0018621
Biological Process	10337	regulation of salicylic acid metabolic process	7 out of 972 genes, 0.72%	51 out of 44951 genes, 0.11%	0.00010935	0.0020724
Biological Process	48518	positive regulation of biological process	105 out of 972 genes, 10.80%	3376 out of 44951 genes, 7.51%	0.00011746	0.0022104
Biological Process	65007	biological regulation	453 out of 972 genes, 46.60%	18340 out of 44951 genes, 40.80%	0.00012143	0.0022695
Biological Process	50896	response to stimulus	453 out of 972 genes, 46.60%	18372 out of 44951 genes, 40.87%	0.0001452	0.0026588
Biological Process	32434	regulation of proteasomal ubiquitin-dependent protein catabolic process	5 out of 972 genes, 0.51%	25 out of 44951 genes, 0.06%	0.00017347	0.0030928
Biological Process	70542	response to fatty acid	4 out of 972 genes, 0.41%	14 out of 44951 genes, 0.03%	0.00018293	0.0032401
Biological Process	1869	negative regulation of complement activation, lectin pathway	3 out of 972 genes, 0.31%	6 out of 44951 genes, 0.01%	0.00019199	0.003314
Biological Process	10200	response to chitin	54 out of 972 genes, 5.56%	1511 out of 44951 genes, 3.36%	0.00025908	0.0043609
Biological Process	33036	macromolecule localization	122 out of 972 genes, 12.55%	4150 out of 44951 genes, 9.23%	0.00032369	0.0052084
Biological Process	2376	immune system process	89 out of 972 genes, 9.16%	2845 out of 44951 genes, 6.33%	0.00032804	0.0052084
Biological Process	46903	secretion	12 out of 972 genes, 1.23%	172 out of 44951 genes, 0.38%	0.00039338	0.0060918
Biological Process	43691	reverse cholesterol transport	2 out of 972 genes, 0.21%	2 out of 44951 genes, 0.00%	0.00046711	0.0069937
Biological Process	10561	negative regulation of glycoprotein biosynthetic process	2 out of 972 genes, 0.21%	2 out of 44951 genes, 0.00%	0.00046711	0.0069937
Biological Process	15976	carbon utilization	13 out of 972 genes, 1.34%	201 out of 44951 genes, 0.45%	0.00047462	0.0070286
Biological Process	6101	citrate metabolic process	3 out of 972 genes, 0.31%	8 out of 44951 genes, 0.02%	0.0005204	0.007329
Biological Process	32459	regulation of protein oligomerization	3 out of 972 genes, 0.31%	8 out of 44951 genes, 0.02%	0.0005204	0.007329
Biological Process	9740	gibberellic acid mediated signaling pathway	12 out of 972 genes, 1.23%	184 out of 44951 genes, 0.41%	0.00071796	0.0095376
Biological Process	9445	putrescine metabolic process	5 out of 972 genes, 0.51%	34 out of 44951 genes, 0.08%	0.00077361	0.0098426
Biological Process	5992	trehalose biosynthetic process	8 out of 972 genes, 0.82%	92 out of 44951 genes, 0.20%	0.00087291	0.010802
Biological Process	70252	actin-mediated cell contraction	2 out of 972 genes, 0.21%	3 out of 44951 genes, 0.01%	0.0013812	0.015587
Biological Process	30207	chondroitin sulfate catabolic process	2 out of 972 genes, 0.21%	3 out of 44951 genes, 0.01%	0.0013812	0.015587
Biological Process	10559	regulation of glycoprotein biosynthetic process	2 out of 972 genes, 0.21%	3 out of 44951 genes, 0.01%	0.0013812	0.015587
Biological Process	10646	regulation of cell communication	28 out of 972 genes, 2.88%	697 out of 44951 genes, 1.55%	0.0014849	0.01656
Biological Process	44085	cellular component biogenesis	125 out of 972 genes, 12.86%	4450 out of 44951 genes, 9.90%	0.0015051	0.016648
Biological Process	16265	death	22 out of 972 genes, 2.26%	501 out of 44951 genes, 1.11%	0.0015537	0.017047
Biological Process	71229	cellular response to acid	4 out of 972 genes, 0.41%	24 out of 44951 genes, 0.05%	0.0016351	0.017725
Biological Process	80027	response to herbivore	6 out of 972 genes, 0.62%	60 out of 44951 genes, 0.13%	0.0018667	0.019838
Biological Process	51365	cellular response to potassium ion starvation	3 out of 972 genes, 0.31%	12 out of 44951 genes, 0.03%	0.0019163	0.019897
Biological Process	51092	positive regulation of NF-kappaB transcription factor activity	3 out of 972 genes, 0.31%	12 out of 44951 genes, 0.03%	0.0019163	0.019897
Biological Process	71398	cellular response to fatty acid	3 out of 972 genes, 0.31%	13 out of 44951 genes, 0.03%	0.0024513	0.024513
Biological Process	51246	regulation of protein metabolic process	41 out of 972 genes, 4.22%	1187 out of 44951 genes, 2.64%	0.0025229	0.025002
Biological Process	30162	regulation of proteolysis	5 out of 972 genes, 0.51%	44 out of 44951 genes, 0.10%	0.0025279	0.025002
Biological Process	70934	CRD-mediated mRNA stabilization	2 out of 972 genes, 0.21%	4 out of 44951 genes, 0.01%	0.0027227	0.026072
Biological Process	8063	Toll signaling pathway	2 out of 972 genes, 0.21%	4 out of 44951 genes, 0.01%	0.0027227	0.026072
Biological Process	42176	regulation of protein catabolic process	6 out of 972 genes, 0.62%	66 out of 44951 genes, 0.15%	0.0030381	0.028589
Biological Process	46165	alcohol biosynthetic process	36 out of 972 genes, 3.70%	1019 out of 44951 genes, 2.27%	0.0031296	0.029045
Biological Process	50821	protein stabilization	5 out of 972 genes, 0.51%	47 out of 44951 genes, 0.10%	0.0033859	0.031
Biological Process	6950	response to stress	288 out of 972 genes, 29.63%	11590 out of 44951 genes, 25.78%	0.0034678	0.031536
Biological Process	10035	response to inorganic substance	86 out of 972 genes, 8.85%	2961 out of 44951 genes, 6.59%	0.0034798	0.03154
Biological Process	31647	regulation of protein stability	5 out of 972 genes, 0.51%	48 out of 44951 genes, 0.11%	0.0037134	0.033323
Biological Process	90047	positive regulation of transcription regulator activity	3 out of 972 genes, 0.31%	16 out of 44951 genes, 0.04%	0.0045733	0.038135
Biological Process	8285	negative regulation of cell proliferation	6 out of 972 genes, 0.62%	74 out of 44951 genes, 0.16%	0.0053595	0.043616
Biological Process	43588	skin development	3 out of 972 genes, 0.31%	17 out of 44951 genes, 0.04%	0.0054648	0.043686
Biological Process	42126	nitrate metabolic process	3 out of 972 genes, 0.31%	17 out of 44951 genes, 0.04%	0.0054648	0.043686
Biological Process	61077	chaperone-mediated protein folding	4 out of 972 genes, 0.41%	34 out of 44951 genes, 0.08%	0.0060171	0.04754
Biological Process	1101	response to acid	4 out of 972 genes, 0.41%	34 out of 44951 genes, 0.08%	0.0060171	0.04754
Molecular Function	5198	structural molecule activity	85 out of 866 genes, 9.82%	1493 out of 40938 genes, 3.65%	1.954e-16	1.3365e-13
Molecular Function	3735	structural constituent of ribosome	68 out of 866 genes, 7.85%	1122 out of 40938 genes, 2.74%	1.2538e-14	4.2881e-12
Molecular Function	4819	glutamine-tRNA ligase activity	5 out of 866 genes, 0.58%	5 out of 40938 genes, 0.01%	4.1883e-09	9.5493e-07
Molecular Function	16829	lyase activity	48 out of 866 genes, 5.54%	913 out of 40938 genes, 2.23%	1.0962e-08	1.8744e-06
Molecular Function	8307	structural constituent of muscle	6 out of 866 genes, 0.69%	11 out of 40938 genes, 0.03%	3.7169e-08	5.0847e-06
Molecular Function	19838	growth factor binding	7 out of 866 genes, 0.81%	27 out of 40938 genes, 0.07%	1.1357e-06	0.00012948
Molecular Function	16830	carbon-carbon lyase activity	18 out of 866 genes, 2.08%	244 out of 40938 genes, 0.60%	5.3964e-06	0.0005273
Molecular Function	16661	oxidoreductase activity, acting on other nitrogenous compounds as donors	5 out of 866 genes, 0.58%	15 out of 40938 genes, 0.04%	1.0543e-05	0.00090143
Molecular Function	3723	RNA binding	62 out of 866 genes, 7.16%	1668 out of 40938 genes, 4.07%	1.5359e-05	0.0011673
Molecular Function	5515	protein binding	252 out of 866 genes, 29.10%	9451 out of 40938 genes, 23.09%	2.059e-05	0.0014084
Molecular Function	46857	oxidoreductase activity, acting on other nitrogenous compounds as donors, with NAD or NADP as acceptor	4 out of 866 genes, 0.46%	9 out of 40938 genes, 0.02%	2.3022e-05	0.0014316
Molecular Function	4666	prostaglandin-endoperoxide synthase activity	3 out of 866 genes, 0.35%	4 out of 40938 genes, 0.01%	3.714e-05	0.001985
Molecular Function	4737	pyruvate decarboxylase activity	4 out of 866 genes, 0.46%	10 out of 40938 genes, 0.02%	3.7726e-05	0.001985
Molecular Function	30528	transcription regulator activity	132 out of 866 genes, 15.24%	4486 out of 40938 genes, 10.96%	5.9911e-05	0.0029271
Molecular Function	20037	heme binding	27 out of 866 genes, 3.12%	557 out of 40938 genes, 1.36%	7.0791e-05	0.0031253
Molecular Function	30151	molybdenum ion binding	5 out of 866 genes, 0.58%	22 out of 40938 genes, 0.05%	8.1756e-05	0.0031253
Molecular Function	19966	interleukin-1 binding	3 out of 866 genes, 0.35%	5 out of 40938 genes, 0.01%	9.1383e-05	0.0031253
Molecular Function	43120	tumor necrosis factor binding	3 out of 866 genes, 0.35%	5 out of 40938 genes, 0.01%	9.1383e-05	0.0031253
Molecular Function	4459	L-lactate dehydrogenase activity	3 out of 866 genes, 0.35%	6 out of 40938 genes, 0.01%	0.00017988	0.0054143
Molecular Function	3779	actin binding	16 out of 866 genes, 1.85%	264 out of 40938 genes, 0.64%	0.00018206	0.0054143
Molecular Function	16705	oxidoreductase activity, acting on paired donors, with incorporation or reduction of molecular oxygen	29 out of 866 genes, 3.35%	670 out of 40938 genes, 1.64%	0.00026916	0.0073643
Molecular Function	19843	rRNA binding	12 out of 866 genes, 1.39%	171 out of 40938 genes, 0.42%	0.00030561	0.0076168
Molecular Function	4805	trehalose-phosphatase activity	8 out of 866 genes, 0.92%	81 out of 40938 genes, 0.20%	0.00032024	0.0076168
Molecular Function	19203	carbohydrate phosphatase activity	9 out of 866 genes, 1.04%	102 out of 40938 genes, 0.25%	0.00032293	0.0076168
Molecular Function	46906	tetrapyrrole binding	27 out of 866 genes, 3.12%	618 out of 40938 genes, 1.51%	0.00037369	0.0084866
Molecular Function	5201	extracellular matrix structural constituent	5 out of 866 genes, 0.58%	30 out of 40938 genes, 0.07%	0.00038463	0.0084866
Molecular Function	47635	alanine-oxo-acid transaminase activity	5 out of 866 genes, 0.58%	31 out of 40938 genes, 0.08%	0.00045066	0.00902
Molecular Function	4021	L-alanine:2-oxoglutarate aminotransferase activity	5 out of 866 genes, 0.58%	31 out of 40938 genes, 0.08%	0.00045066	0.00902
Molecular Function	9055	electron carrier activity	28 out of 866 genes, 3.23%	660 out of 40938 genes, 1.61%	0.00046645	0.00902
Molecular Function	43546	molybdopterin cofactor binding	3 out of 866 genes, 0.35%	8 out of 40938 genes, 0.02%	0.00048792	0.00902
Molecular Function	9703	nitrate reductase (NADH) activity	3 out of 866 genes, 0.35%	8 out of 40938 genes, 0.02%	0.00048792	0.00902
Molecular Function	4451	isocitrate lyase activity	3 out of 866 genes, 0.35%	9 out of 40938 genes, 0.02%	0.00072038	0.012318
Molecular Function	50840	extracellular matrix binding	3 out of 866 genes, 0.35%	9 out of 40938 genes, 0.02%	0.00072038	0.012318
Molecular Function	3994	aconitate hydratase activity	3 out of 866 genes, 0.35%	9 out of 40938 genes, 0.02%	0.00072038	0.012318
Molecular Function	46332	SMAD binding	3 out of 866 genes, 0.35%	10 out of 40938 genes, 0.02%	0.0010129	0.016899
Molecular Function	5488	binding	613 out of 866 genes, 70.79%	26979 out of 40938 genes, 65.90%	0.0011022	0.01795
Molecular Function	33550	MAP kinase tyrosine phosphatase activity	2 out of 866 genes, 0.23%	3 out of 40938 genes, 0.01%	0.0013221	0.019951
Molecular Function	90353	polygalacturonase inhibitor activity	3 out of 866 genes, 0.35%	11 out of 40938 genes, 0.03%	0.0013709	0.019951
Molecular Function	4457	lactate dehydrogenase activity	3 out of 866 genes, 0.35%	11 out of 40938 genes, 0.03%	0.0013709	0.019951
Molecular Function	3823	antigen binding	3 out of 866 genes, 0.35%	11 out of 40938 genes, 0.03%	0.0013709	0.019951
Molecular Function	45300	acyl-[acyl-carrier-protein] desaturase activity	3 out of 866 genes, 0.35%	11 out of 40938 genes, 0.03%	0.0013709	0.019951
Molecular Function	3676	nucleic acid binding	225 out of 866 genes, 25.98%	8886 out of 40938 genes, 21.71%	0.0014101	0.020093
Molecular Function	16832	aldehyde-lyase activity	5 out of 866 genes, 0.58%	40 out of 40938 genes, 0.10%	0.0014922	0.020413
Molecular Function	30955	potassium ion binding	5 out of 866 genes, 0.58%	40 out of 40938 genes, 0.10%	0.0014922	0.020413
Molecular Function	19825	oxygen binding	16 out of 866 genes, 1.85%	324 out of 40938 genes, 0.79%	0.0016488	0.021555
Molecular Function	31420	alkali metal ion binding	5 out of 866 genes, 0.58%	41 out of 40938 genes, 0.10%	0.0016702	0.021555
Molecular Function	4743	pyruvate kinase activity	5 out of 866 genes, 0.58%	41 out of 40938 genes, 0.10%	0.0016702	0.021555
Molecular Function	8092	cytoskeletal protein binding	23 out of 866 genes, 2.66%	554 out of 40938 genes, 1.35%	0.0018958	0.023577
Molecular Function	16491	oxidoreductase activity	94 out of 866 genes, 10.85%	3300 out of 40938 genes, 8.06%	0.0020351	0.024857
Molecular Function	5506	iron ion binding	30 out of 866 genes, 3.46%	805 out of 40938 genes, 1.97%	0.0022673	0.027152
Molecular Function	8398	sterol 14-demethylase activity	2 out of 866 genes, 0.23%	4 out of 40938 genes, 0.01%	0.002607	0.02972
Molecular Function	51787	misfolded protein binding	2 out of 866 genes, 0.23%	5 out of 40938 genes, 0.01%	0.0042841	0.045958
Molecular Function	5518	collagen binding	3 out of 866 genes, 0.35%	16 out of 40938 genes, 0.04%	0.0043002	0.045958
Molecular Function	50126	N-carbamoylputrescine amidase activity	3 out of 866 genes, 0.35%	16 out of 40938 genes, 0.04%	0.0043002	0.045958
Molecular Function	9815	1-aminocyclopropane-1-carboxylate oxidase activity	4 out of 866 genes, 0.46%	32 out of 40938 genes, 0.08%	0.0044653	0.046988
Cellular Component	44445	cytosolic part	62 out of 944 genes, 6.57%	739 out of 45082 genes, 1.64%	3.0739e-20	1.2419e-17
Cellular Component	22625	cytosolic large ribosomal subunit	37 out of 944 genes, 3.92%	330 out of 45082 genes, 0.73%	1.533e-16	2.0645e-14
Cellular Component	15934	large ribosomal subunit	39 out of 944 genes, 4.13%	390 out of 45082 genes, 0.87%	1.116e-15	1.1271e-13
Cellular Component	44421	extracellular region part	29 out of 944 genes, 3.07%	253 out of 45082 genes, 0.56%	1.6383e-13	1.1031e-11
Cellular Component	5840	ribosome	81 out of 944 genes, 8.58%	1726 out of 45082 genes, 3.83%	1.71e-11	9.8692e-10
Cellular Component	16460	myosin II complex	7 out of 944 genes, 0.74%	10 out of 45082 genes, 0.02%	1.9614e-10	9.9052e-09
Cellular Component	70062	extracellular vesicular exosome	12 out of 944 genes, 1.27%	48 out of 45082 genes, 0.11%	2.3121e-10	1.0379e-08
Cellular Component	43230	extracellular organelle	12 out of 944 genes, 1.27%	49 out of 45082 genes, 0.11%	3.0038e-10	1.1032e-08
Cellular Component	43228	non-membrane-bounded organelle	150 out of 944 genes, 15.89%	4361 out of 45082 genes, 9.67%	9.2476e-10	2.8739e-08
Cellular Component	5829	cytosol	171 out of 944 genes, 18.11%	5234 out of 45082 genes, 11.61%	2.2426e-09	5.0334e-08
Cellular Component	32432	actin filament bundle	8 out of 944 genes, 0.85%	20 out of 45082 genes, 0.04%	3.6174e-09	7.6917e-08
Cellular Component	30529	ribonucleoprotein complex	91 out of 944 genes, 9.64%	2299 out of 45082 genes, 5.10%	5.5809e-09	1.1273e-07
Cellular Component	44449	contractile fiber part	10 out of 944 genes, 1.06%	40 out of 45082 genes, 0.09%	7.4184e-09	1.3623e-07
Cellular Component	5615	extracellular space	17 out of 944 genes, 1.80%	154 out of 45082 genes, 0.34%	2.9515e-08	5.1844e-07
Cellular Component	31012	extracellular matrix	15 out of 944 genes, 1.59%	122 out of 45082 genes, 0.27%	4.4933e-08	7.5637e-07
Cellular Component	32991	macromolecular complex	303 out of 944 genes, 32.10%	11063 out of 45082 genes, 24.54%	7.0504e-08	1.1394e-06
Cellular Component	60205	cytoplasmic membrane-bounded vesicle lumen	6 out of 944 genes, 0.64%	20 out of 45082 genes, 0.04%	2.5018e-06	3.0629e-05
Cellular Component	31983	vesicle lumen	6 out of 944 genes, 0.64%	20 out of 45082 genes, 0.04%	2.5018e-06	3.0629e-05
Cellular Component	31982	vesicle	30 out of 944 genes, 3.18%	602 out of 45082 genes, 1.34%	1.442e-05	0.00016182
Cellular Component	44446	intracellular organelle part	346 out of 944 genes, 36.65%	13724 out of 45082 genes, 30.44%	2.1498e-05	0.00022856
Cellular Component	44422	organelle part	346 out of 944 genes, 36.65%	13757 out of 45082 genes, 30.52%	2.667e-05	0.00026852
Cellular Component	5882	intermediate filament	5 out of 944 genes, 0.53%	18 out of 45082 genes, 0.04%	2.7204e-05	0.00026852
Cellular Component	31974	membrane-enclosed lumen	171 out of 944 genes, 18.11%	6066 out of 45082 genes, 13.46%	2.7956e-05	0.00026891
Cellular Component	43233	organelle lumen	170 out of 944 genes, 18.01%	6042 out of 45082 genes, 13.40%	3.2882e-05	0.00030894
Cellular Component	9325	nitrate reductase complex	4 out of 944 genes, 0.42%	11 out of 45082 genes, 0.02%	5.6059e-05	0.00050329
Cellular Component	15629	actin cytoskeleton	14 out of 944 genes, 1.48%	192 out of 45082 genes, 0.43%	5.9527e-05	0.0005228
Cellular Component	48770	pigment granule	8 out of 944 genes, 0.85%	65 out of 45082 genes, 0.14%	6.3088e-05	0.00053099
Cellular Component	45111	intermediate filament cytoskeleton	5 out of 944 genes, 0.53%	23 out of 45082 genes, 0.05%	9.7947e-05	0.0007759
Cellular Component	5856	cytoskeleton	42 out of 944 genes, 4.45%	1111 out of 45082 genes, 2.46%	0.00020918	0.0016252
Cellular Component	5576	extracellular region	96 out of 944 genes, 10.17%	3280 out of 45082 genes, 7.28%	0.00059635	0.0040154
Cellular Component	5844	polysome	4 out of 944 genes, 0.42%	21 out of 45082 genes, 0.05%	0.00086046	0.0056069
Cellular Component	42995	cell projection	11 out of 944 genes, 1.17%	169 out of 45082 genes, 0.37%	0.00092592	0.0059376
Cellular Component	70288	ferritin complex	2 out of 944 genes, 0.21%	3 out of 45082 genes, 0.01%	0.0012957	0.0079121
Cellular Component	8043	intracellular ferritin complex	2 out of 944 genes, 0.21%	3 out of 45082 genes, 0.01%	0.0012957	0.0079121
Cellular Component	30666	endocytic vesicle membrane	3 out of 944 genes, 0.32%	11 out of 45082 genes, 0.02%	0.0013317	0.0079121
Cellular Component	48471	perinuclear region of cytoplasm	8 out of 944 genes, 0.85%	107 out of 45082 genes, 0.24%	0.0018912	0.011073
Cellular Component	43234	protein complex	220 out of 944 genes, 23.31%	8805 out of 45082 genes, 19.53%	0.0021231	0.012253
Cellular Component	42788	polysomal ribosome	2 out of 944 genes, 0.21%	4 out of 45082 genes, 0.01%	0.0025554	0.013951
Cellular Component	70937	CRD-mediated mRNA stability complex	2 out of 944 genes, 0.21%	4 out of 45082 genes, 0.01%	0.0025554	0.013951
Cellular Component	34366	spherical high-density lipoprotein particle	2 out of 944 genes, 0.21%	4 out of 45082 genes, 0.01%	0.0025554	0.013951
Cellular Component	5622	intracellular	806 out of 944 genes, 85.38%	36953 out of 45082 genes, 81.97%	0.0027588	0.014861
Cellular Component	19814	immunoglobulin complex	3 out of 944 genes, 0.32%	14 out of 45082 genes, 0.03%	0.0028033	0.014902
Cellular Component	10008	endosome membrane	9 out of 944 genes, 0.95%	141 out of 45082 genes, 0.31%	0.0029944	0.015313
Cellular Component	5583	fibrillar collagen	3 out of 944 genes, 0.32%	15 out of 45082 genes, 0.03%	0.0034499	0.017207
Cellular Component	5634	nucleus	359 out of 944 genes, 38.03%	15261 out of 45082 genes, 33.85%	0.0036145	0.017808
Cellular Component	44428	nuclear part	162 out of 944 genes, 17.16%	6332 out of 45082 genes, 14.05%	0.0037596	0.0183
Cellular Component	5811	lipid particle	4 out of 944 genes, 0.42%	31 out of 45082 genes, 0.07%	0.0038333	0.018436
Cellular Component	44424	intracellular part	787 out of 944 genes, 83.37%	36072 out of 45082 genes, 80.01%	0.0045058	0.021416
Cellular Component	8305	integrin complex	3 out of 944 genes, 0.32%	19 out of 45082 genes, 0.04%	0.0069041	0.03206
Cellular Component	1726	ruffle	3 out of 944 genes, 0.32%	19 out of 45082 genes, 0.04%	0.0069041	0.03206
Cellular Component	5589	collagen type VI	2 out of 944 genes, 0.21%	7 out of 45082 genes, 0.02%	0.0085773	0.036476
Cellular Component	32994	protein-lipid complex	2 out of 944 genes, 0.21%	7 out of 45082 genes, 0.02%	0.0085773	0.036476
Cellular Component	30934	anchoring collagen	2 out of 944 genes, 0.21%	7 out of 45082 genes, 0.02%	0.0085773	0.036476
Cellular Component	5796	Golgi lumen	2 out of 944 genes, 0.21%	7 out of 45082 genes, 0.02%	0.0085773	0.036476
Cellular Component	43235	receptor complex	3 out of 944 genes, 0.32%	21 out of 45082 genes, 0.05%	0.009187	0.038263
Cellular Component	5853	eukaryotic translation elongation factor 1 complex	3 out of 944 genes, 0.32%	21 out of 45082 genes, 0.05%	0.009187	0.038263
Cellular Component	5788	endoplasmic reticulum lumen	5 out of 944 genes, 0.53%	62 out of 45082 genes, 0.14%	0.0096423	0.03975
Cellular Component	31252	cell leading edge	4 out of 944 genes, 0.42%	42 out of 45082 genes, 0.09%	0.011382	0.045983

## Sheet: 8
Additional file 14.8: Over-represented GO terms in down-regulated DEGs in the roots at 12 h.
Categoty	GO-ID	Description	DEG Frequency	Genome frequency	p-value	Corrected p-value
Biological Process	6811	ion transport	70 out of 696 genes, 10.057%	2798 out of 44951 genes, 6.225%	5.8845e-05	0.029536
Biological Process	10439	regulation of glucosinolate biosynthetic process	7 out of 696 genes, 1.006%	68 out of 44951 genes, 0.151%	8.854e-05	0.029536
Biological Process	6829	zinc ion transport	5 out of 696 genes, 0.718%	32 out of 44951 genes, 0.071%	0.00012494	0.029536
Biological Process	51343	positive regulation of cyclic-nucleotide phosphodiesterase activity	2 out of 696 genes, 0.287%	2 out of 44951 genes, 0.004%	0.0002394	0.029536
Biological Process	51342	regulation of cyclic-nucleotide phosphodiesterase activity	2 out of 696 genes, 0.287%	2 out of 44951 genes, 0.004%	0.0002394	0.029536
Biological Process	5980	glycogen catabolic process	2 out of 696 genes, 0.287%	2 out of 44951 genes, 0.004%	0.0002394	0.029536
Biological Process	32414	positive regulation of ion transmembrane transporter activity	2 out of 696 genes, 0.287%	2 out of 44951 genes, 0.004%	0.0002394	0.029536
Biological Process	8643	carbohydrate transport	15 out of 696 genes, 2.155%	347 out of 44951 genes, 0.772%	0.00039024	0.04466
Biological Process	19439	aromatic compound catabolic process	14 out of 696 genes, 2.011%	317 out of 44951 genes, 0.705%	0.00048812	0.048384
Biological Process	6949	syncytium formation	5 out of 696 genes, 0.718%	45 out of 44951 genes, 0.100%	0.00064236	0.048384
Biological Process	32768	regulation of monooxygenase activity	2 out of 696 genes, 0.287%	3 out of 44951 genes, 0.007%	0.00071081	0.048384
Biological Process	10522	regulation of calcium ion transport into cytosol	2 out of 696 genes, 0.287%	3 out of 44951 genes, 0.007%	0.00071081	0.048384
Molecular Function	22891	substrate-specific transmembrane transporter activity	68 out of 647 genes, 10.51%	2379 out of 40938 genes, 5.81%	1.9748e-06	0.0012895
Molecular Function	22892	substrate-specific transporter activity	73 out of 647 genes, 11.28%	2687 out of 40938 genes, 6.56%	4.9006e-06	0.0015807
Molecular Function	8324	cation transmembrane transporter activity	41 out of 647 genes, 6.34%	1227 out of 40938 genes, 3.00%	7.2621e-06	0.0015807
Molecular Function	15075	ion transmembrane transporter activity	51 out of 647 genes, 7.88%	1721 out of 40938 genes, 4.20%	1.569e-05	0.0025614
Molecular Function	22857	transmembrane transporter activity	73 out of 647 genes, 11.28%	2848 out of 40938 genes, 6.96%	3.4077e-05	0.0042942
Molecular Function	47209	coniferyl-alcohol glucosyltransferase activity	4 out of 647 genes, 0.62%	13 out of 40938 genes, 0.03%	3.9456e-05	0.0042942
Molecular Function	5215	transporter activity	86 out of 647 genes, 13.29%	3565 out of 40938 genes, 8.71%	5.776e-05	0.0053882
Molecular Function	5385	zinc ion transmembrane transporter activity	5 out of 647 genes, 0.77%	29 out of 40938 genes, 0.07%	8.4211e-05	0.0068737
Molecular Function	15293	symporter activity	14 out of 647 genes, 2.16%	285 out of 40938 genes, 0.70%	0.00020417	0.013339
Molecular Function	31432	titin binding	2 out of 647 genes, 0.31%	2 out of 40938 genes, 0.00%	0.0002494	0.013339
Molecular Function	43274	phospholipase binding	2 out of 647 genes, 0.31%	2 out of 40938 genes, 0.00%	0.0002494	0.013339
Molecular Function	31997	N-terminal myristoylation domain binding	2 out of 647 genes, 0.31%	2 out of 40938 genes, 0.00%	0.0002494	0.013339
Molecular Function	15144	carbohydrate transmembrane transporter activity	15 out of 647 genes, 2.32%	328 out of 40938 genes, 0.80%	0.00026556	0.013339
Molecular Function	15294	solute:cation symporter activity	13 out of 647 genes, 2.01%	280 out of 40938 genes, 0.68%	0.00057924	0.027018
Molecular Function	51119	sugar transmembrane transporter activity	12 out of 647 genes, 1.85%	252 out of 40938 genes, 0.62%	0.00074656	0.0325
