# Supplementary material for: Comparative Transcriptome Analysis of Leaves and Roots in Response to Sudden Increase in Salinity in Brassica napus by RNA-seq
Source: Biomed Res Int. 2014 Aug 7;2014:467395. doi: 10.1155/2014/467395 (PMC4142189; doi:10.1155/2014/467395)
Supplement: Supplementary file 1 — is primer pair for qRT-PCR analysis. Supplementary file 2 indicates expression fold change of salt responsive gene markers in B. napus. Supplementary file 3 and 4 are tables indicating summary of sequencing output and statistics for the unigene of B. napus assembled by SOAPdenovo, respectively. Supplementary file 5 reveals annotations of all-unigenes. Supplementary file 6 is a graph depicting length distribution of the all-unigenes with SwissProt or NR annotations. Supplementary file 7 and 8 are GO and KEGG ontology classifications of all-unigenes, respectively. Supplementary file 9 shows comparison of transcription factor families between B. napus, Arabidopsis and B. rapa. Supplementary file 10 indicates log2 fold-changes of DEGs in the leaves and the roots at 1h and 12h. Supplementary file 11 shows Venn diagrams depicting number of DEGs regulated in the leaves and the roots of B. napus. Supplementary file 12 shows the result of validation of DEGs by semi-qRT-PCR. Supplementary file 13 shows the comparison of expression fold-change for DEGs between N119 and Kirariboshi. Supplementary file 14 lists all over-represented GO terms in DEGs. Supplementary file 15, 16 and 17 indicate comparison of over-represented GO terms of “Biological Process”, “Molecular Function”, and “Cellular Component”, respectively in the leaves and the roots at 1h and 12h after stress. Supplementary file 18 lists all over-represented KEGG ontology in DEGs. [file 467395.f1.zip › 467395.f1/Additional file 15.xlsx]

## Sheet: BP
Additional file 15: Comparison of over-represented GO terms of “Biological Process” in the leaves and the roots at 1 h and 12 h post-stress
GO Term	Leaf_01hour_up-regulated	Leaf_01hour_down-regulated	Leaf_12hour_up-regulated	Leaf_12hour_down-regulated	Root_01hour_up-regulated	Root_01hour_down-regulated	Root_12hour_up-regulated	Root_12hour_down-regulated
abscisic acid mediated signaling pathway
abscisic acid metabolic process
acetate biosynthetic process
acetate derivative biosynthetic process
acetate derivative metabolic process
acetate metabolic process
actin-mediated cell contraction
acyl-CoA metabolic process
adaptive immune response
ADP transport
alanine catabolic process
alcohol biosynthetic process
alkene biosynthetic process
amine metabolic process
amine transport
ammonium transport
apocarotenoid metabolic process
aromatic amino acid family biosynthetic process, prephenate pathway
aromatic amino acid family metabolic process
aromatic compound biosynthetic process
aromatic compound catabolic process
aspartate family amino acid metabolic process
basic amino acid transport
bile acid and bile salt transport
biological regulation
biosynthetic process
callose localization
carbohydrate transport
carbon utilization
carboxylic acid biosynthetic process
carboxylic acid catabolic process
carboxylic acid metabolic process
carboxylic acid transport
catabolic process
cell activation
cell part morphogenesis
cell projection organization
cell wall assembly
cell wall macromolecule catabolic process
cellular aromatic compound metabolic process
cellular biosynthetic process
cellular catabolic process
cellular cation homeostasis
cellular component biogenesis
cellular component disassembly
cellular component movement
cellular di-, tri-valent inorganic cation homeostasis
cellular ketone metabolic process
cellular localization
cellular macromolecule localization
cellular respiration
cellular response to acid
cellular response to fatty acid
cellular response to freezing
cellular response to mechanical stimulus
cellular response to organic nitrogen
cellular response to potassium ion starvation
cellular response to protein stimulus
cellular response to retinoic acid
cellular response to vitamin A
cGMP biosynthetic process
cGMP metabolic process
chaperone-mediated protein folding
chitin metabolic process
chondroitin sulfate catabolic process
citrate metabolic process
CRD-mediated mRNA stabilization
cyclic nucleotide metabolic process
cyclooxygenase pathway
death
defense response by callose deposition
defense response to fungus
defense response
defense response, incompatible interaction
dehiscence
dephosphorylation
detection of biotic stimulus
detection of stimulus
developmental process
di-, tri-valent inorganic cation homeostasis
disaccharide transport
ER-nucleus signaling pathway
ethylene biosynthetic process
ethylene mediated signaling pathway
extracellular matrix assembly
extracellular structure organization
fatty acid metabolic process
folic acid metabolic process
gametophyte development
gene expression
generation of precursor metabolites and energy
gibberellic acid mediated signaling pathway
glucose 6-phosphate metabolic process
glucosinolate metabolic process
glutamine family amino acid metabolic process
glutaminyl-tRNA aminoacylation
glutamyl-tRNA aminoacylation
glycogen catabolic process
glycolysis
heat acclimation
heterocycle metabolic process
hexachlorocyclohexane metabolic process
hyperosmotic response
hyperosmotic salinity response
immune effector process
immune system process
indolebutyric acid metabolic process
induced systemic resistance
intracellular protein kinase cascade
intracellular receptor mediated signaling pathway
intracellular signal transduction
intramembranous ossification
ion transport
jasmonic acid biosynthetic process
jasmonic acid mediated signaling pathway
jasmonic acid metabolic process
ketone biosynthetic process
lateral root formation
leaf morphogenesis
leaf senescence
lipid metabolic process
lipid modification
lipid oxidation
localization of cell
localization
locomotion
L-phenylalanine biosynthetic process
L-phenylalanine metabolic process
macromolecular complex subunit organization
macromolecule catabolic process
macromolecule localization
maintenance of location
membrane fusion
membrane organization
methionine metabolic process
monocarboxylic acid metabolic process
monosaccharide transport
monoterpenoid biosynthetic process
monoterpenoid metabolic process
mRNA metabolic process
mucilage extrusion from seed coat
mucilage metabolic process involved seed coat development
mucilage metabolic process
multicellular organism growth
multicellular organismal metabolic process
multi-organism process
MyD88-dependent toll-like receptor signaling pathway
negative regulation of biological process
negative regulation of cell cycle
negative regulation of cell death
negative regulation of cell proliferation
negative regulation of cell-substrate adhesion
negative regulation of cellular defense response
negative regulation of complement activation, lectin pathway
negative regulation of glycoprotein biosynthetic process
negative regulation of programmed cell death
negative regulation of protein metabolic process
negative regulation of transferase activity
negative regulation of translation
nitrate metabolic process
nuclear-transcribed mRNA catabolic process, nonsense-mediated decay
nucleotide transport
oligosaccharide transport
organic acid metabolic process
organic acid transport
organic cation transport
oxylipin biosynthetic process
oxylipin metabolic process
para-aminobenzoic acid metabolic process
pathogenesis
peptide metabolic process
peroxisome fission
phenylpropanoid metabolic process
photoprotection
plant-type cell wall loosening
pollen development
polyketide biosynthetic process
polyketide metabolic process
polysaccharide localization
positive regulation of auxin metabolic process
positive regulation of biological process
positive regulation of cellular biosynthetic process
positive regulation of cyclic-nucleotide phosphodiesterase activity
positive regulation of development, heterochronic
positive regulation of gibberellic acid mediated signaling pathway
positive regulation of ion transmembrane transporter activity
positive regulation of NF-kappaB transcription factor activity
positive regulation of telomerase activity
positive regulation of transcription regulator activity
positive regulation of tryptophan metabolic process
post-Golgi vesicle-mediated transport
potassium ion export
protein autoubiquitination
protein heterooligomerization
protein heterotrimerization
protein oligomerization
protein stabilization
protein targeting to membrane
protein trimerization
purine ribonucleoside triphosphate metabolic process
putrescine metabolic process
raffinose family oligosaccharide biosynthetic process
regulation of anthocyanin metabolic process
regulation of autophagy
regulation of binding
regulation of body fluid levels
regulation of calcium ion transport into cytosol
regulation of cell communication
regulation of cell proliferation
regulation of cellular amino acid metabolic process
regulation of cellular component biogenesis
regulation of cellular component organization
regulation of cellular process
regulation of cyclic-nucleotide phosphodiesterase activity
regulation of defense response to virus by host
regulation of defense response
regulation of developmental process
regulation of DNA binding
regulation of gibberellin biosynthetic process
regulation of glucosinolate biosynthetic process
regulation of glycoprotein biosynthetic process
regulation of hydrogen peroxide metabolic process
regulation of immune response
regulation of immune system process
regulation of monooxygenase activity
regulation of multi-organism process
regulation of oxygen and reactive oxygen species metabolic process
regulation of plant-type hypersensitive response
regulation of proteasomal ubiquitin-dependent protein catabolic process
regulation of protein catabolic process
regulation of protein metabolic process
regulation of protein oligomerization
regulation of protein stability
regulation of proteolysis
regulation of response to stimulus
regulation of salicylic acid metabolic process
regulation of secondary metabolic process
regulation of telomerase activity
regulation of transcription regulator activity
regulation of vegetative phase change
respiratory burst involved in defense response
respiratory burst
respiratory gaseous exchange
response to abiotic stimulus
response to abscisic acid stimulus
response to absence of light
response to acid
response to antibiotic
response to benzoic acid stimulus
response to biotic stimulus
response to carbohydrate stimulus
response to chemical stimulus
response to chitin
response to cold
response to cyclopentenone
response to cytokine stimulus
response to endogenous stimulus
response to endoplasmic reticulum stress
response to ethylene stimulus
response to fatty acid
response to fungus
response to herbivore
response to inorganic substance
response to insect
response to jasmonic acid stimulus
response to light intensity
response to low fluence blue light stimulus by blue low-fluence system
response to mechanical stimulus
response to organic substance
response to osmotic stress
response to oxidative stress
response to oxygen levels
response to protein stimulus
response to salicylic acid stimulus
response to stimulus
response to stress
response to temperature stimulus
response to unfolded protein
response to vitamin
response to water deprivation
response to wounding
response to xenobiotic stimulus
reverse cholesterol transport
ribosomal large subunit biogenesis
ribosome biogenesis
RNA catabolic process
RNA metabolic process
salicylic acid biosynthetic process
salicylic acid mediated signaling pathway
salicylic acid metabolic process
secondary metabolic process
secretion
senescence
sensory perception of sound
sequestering of actin monomers
sesquiterpene biosynthetic process
sesquiterpene metabolic process
sesquiterpenoid biosynthetic process
sesquiterpenoid metabolic process
sexual sporulation
S-glycoside metabolic process
shoot system development
signal transmission
signaling
skeletal myofibril assembly
small molecule biosynthetic process
small molecule metabolic process
somatic embryogenesis
sphingolipid biosynthetic process
sporulation
SRP-dependent cotranslational protein targeting to membrane
SRP-dependent cotranslational protein targeting to membrane, translocation
stamen filament development
stomatal lineage progression
sucrose transport
sulfur amino acid metabolic process
syncytium formation
system process
systemic acquired resistance
terpene metabolic process
thioester metabolic process
Toll signaling pathway
toxin catabolic process
toxin metabolic process
translation
translational elongation
translational initiation
translational termination
transpiration
transport
trehalose biosynthetic process
wound healing
zinc ion transport
