# Supplementary material for: Comparative Transcriptome Analysis of Leaves and Roots in Response to Sudden Increase in Salinity in Brassica napus by RNA-seq
Source: Biomed Res Int. 2014 Aug 7;2014:467395. doi: 10.1155/2014/467395 (PMC4142189; doi:10.1155/2014/467395)
Supplement: Supplementary file 1 — is primer pair for qRT-PCR analysis. Supplementary file 2 indicates expression fold change of salt responsive gene markers in B. napus. Supplementary file 3 and 4 are tables indicating summary of sequencing output and statistics for the unigene of B. napus assembled by SOAPdenovo, respectively. Supplementary file 5 reveals annotations of all-unigenes. Supplementary file 6 is a graph depicting length distribution of the all-unigenes with SwissProt or NR annotations. Supplementary file 7 and 8 are GO and KEGG ontology classifications of all-unigenes, respectively. Supplementary file 9 shows comparison of transcription factor families between B. napus, Arabidopsis and B. rapa. Supplementary file 10 indicates log2 fold-changes of DEGs in the leaves and the roots at 1h and 12h. Supplementary file 11 shows Venn diagrams depicting number of DEGs regulated in the leaves and the roots of B. napus. Supplementary file 12 shows the result of validation of DEGs by semi-qRT-PCR. Supplementary file 13 shows the comparison of expression fold-change for DEGs between N119 and Kirariboshi. Supplementary file 14 lists all over-represented GO terms in DEGs. Supplementary file 15, 16 and 17 indicate comparison of over-represented GO terms of “Biological Process”, “Molecular Function”, and “Cellular Component”, respectively in the leaves and the roots at 1h and 12h after stress. Supplementary file 18 lists all over-represented KEGG ontology in DEGs. [file 467395.f1.zip › 467395.f1/Additional file 16.xlsx]

## Sheet: MF
Additional file 16: Comparison of over-represented GO terms of “Molecular Function” in the leaves and the roots at 1 h and 12 h post-stress
GO Tem	Leaf_01hour_up-regulated	Leaf_01hour_down-regulated	Leaf_12hour_up-regulated	Leaf_12hour_down-regulated	Root_01hour_up-regulated	Root_01hour_down-regulated	Root_12hour_up-regulated	Root_12hour_down-regulated
(+)-abscisic acid 8'-hydroxylase activity
1,4-alpha-glucan branching enzyme activity
1-aminocyclopropane-1-carboxylate oxidase activity
9-cis-epoxycarotenoid dioxygenase activity
acid phosphatase activity
aconitate hydratase activity
actin binding
acyl-[acyl-carrier-protein] desaturase activity
ADP transmembrane transporter activity
alanine-oxo-acid transaminase activity
aldehyde-lyase activity
alkali metal ion binding
allene-oxide cyclase activity
amine transmembrane transporter activity
antigen binding
arsenate reductase (glutaredoxin) activity
arsenate reductase activity
aryl-alcohol dehydrogenase (NADP+) activity
bile acid transmembrane transporter activity
bile acid:sodium symporter activity
binding
calcium ion binding
carbohydrate phosphatase activity
carbohydrate transmembrane transporter activity
carbon-carbon lyase activity
carboxylic acid transmembrane transporter activity
carotenoid dioxygenase activity
cation transmembrane transporter activity
collagen binding
coniferyl-alcohol glucosyltransferase activity
cyclase activity
cytoskeletal protein binding
delta1-pyrroline-5-carboxylate synthetase activity
desulfoglucosinolate sulfotransferase activity
dioxygenase activity
disaccharide transmembrane transporter activity
electron carrier activity
extracellular matrix binding
extracellular matrix structural constituent
ferroxidase activity
flavonol 3-O-glucosyltransferase activity
glutamine-tRNA ligase activity
glutaminyl-tRNA synthase (glutamine-hydrolyzing) activity
glutathione transferase activity
growth factor binding
heme binding
hexitol dehydrogenase activity
hydrogen-exporting ATPase activity, phosphorylative mechanism
hydrolase activity, acting on carbon-nitrogen (but not peptide) bonds
identical protein binding
inositol phosphoceramide synthase activity
interleukin-1 binding
ion transmembrane transporter activity
iron ion binding
isocitrate lyase activity
lactate dehydrogenase activity
L-alanine:2-oxoglutarate aminotransferase activity
L-lactate dehydrogenase activity
lyase activity
mannitol dehydrogenase activity
MAP kinase tyrosine phosphatase activity
misfolded protein binding
molybdenum ion binding
molybdopterin cofactor binding
monocarboxylic acid transmembrane transporter activity
N-carbamoylputrescine amidase activity
N-terminal myristoylation domain binding
nitrate reductase (NADH) activity
nucleic acid binding
organic acid transmembrane transporter activity
organic acid:sodium symporter activity
oxidative phosphorylation uncoupler activity
oxidoreductase activity
oxidoreductase activity, acting on diphenols and related substances as donors, oxygen as acceptor
oxidoreductase activity, acting on other nitrogenous compounds as donors
oxidoreductase activity, acting on other nitrogenous compounds as donors, with NAD or NADP as acceptor
oxidoreductase activity, acting on paired donors, with incorporation or reduction of molecular oxygen
oxidoreductase activity, acting on phosphorus or arsenic in donors
oxidoreductase activity, acting on phosphorus or arsenic in donors, with disulfide as acceptor
oxidoreductase activity, acting on single donors with incorporation of molecular oxygen
oxidoreductase activity, acting on single donors with incorporation of molecular oxygen, incorporation of two atoms of oxygen
oxidoreductase activity, acting on the CH-NH group of donors, oxygen as acceptor
oxygen binding
phosphatidylinositol-3,5-bisphosphate 5-phosphatase activity
phosphoenolpyruvate carboxykinase (ATP) activity
phospholipase binding
phosphoprotein phosphatase activity
phosphoric ester hydrolase activity
plant-type cell wall loosening
polyamine oxidase activity
polygalacturonase inhibitor activity
potassium ion binding
profilin binding
prostaglandin-endoperoxide synthase activity
protein binding
protein histidine kinase binding
protein serine/threonine phosphatase activity
pyruvate decarboxylase activity
pyruvate kinase activity
quercetin 7-O-glucosyltransferase activity
RNA binding
rRNA binding
serine-type endopeptidase activity
SMAD binding
sodium ion transmembrane transporter activity
solute:cation symporter activity
solute:sodium symporter activity
sterol 14-demethylase activity
structural constituent of muscle
structural constituent of ribosome
structural molecule activity
substrate-specific transmembrane transporter activity
substrate-specific transporter activity
sucrose transmembrane transporter activity
sugar transmembrane transporter activity
sulfotransferase activity
symporter activity
tetrapyrrole binding
titin binding
transmembrane transporter activity
transcription regulator activity
transporter activity
trehalose-phosphatase activity
tryptophan synthase activity
UDP-glucose 4-epimerase activity
UDP-glycosyltransferase activity
zinc ion transmembrane transporter activity
