# Supplementary material for: Comparative Transcriptome Analysis of Leaves and Roots in Response to Sudden Increase in Salinity in Brassica napus by RNA-seq
Source: Biomed Res Int. 2014 Aug 7;2014:467395. doi: 10.1155/2014/467395 (PMC4142189; doi:10.1155/2014/467395)
Supplement: Supplementary file 1 — is primer pair for qRT-PCR analysis. Supplementary file 2 indicates expression fold change of salt responsive gene markers in B. napus. Supplementary file 3 and 4 are tables indicating summary of sequencing output and statistics for the unigene of B. napus assembled by SOAPdenovo, respectively. Supplementary file 5 reveals annotations of all-unigenes. Supplementary file 6 is a graph depicting length distribution of the all-unigenes with SwissProt or NR annotations. Supplementary file 7 and 8 are GO and KEGG ontology classifications of all-unigenes, respectively. Supplementary file 9 shows comparison of transcription factor families between B. napus, Arabidopsis and B. rapa. Supplementary file 10 indicates log2 fold-changes of DEGs in the leaves and the roots at 1h and 12h. Supplementary file 11 shows Venn diagrams depicting number of DEGs regulated in the leaves and the roots of B. napus. Supplementary file 12 shows the result of validation of DEGs by semi-qRT-PCR. Supplementary file 13 shows the comparison of expression fold-change for DEGs between N119 and Kirariboshi. Supplementary file 14 lists all over-represented GO terms in DEGs. Supplementary file 15, 16 and 17 indicate comparison of over-represented GO terms of “Biological Process”, “Molecular Function”, and “Cellular Component”, respectively in the leaves and the roots at 1h and 12h after stress. Supplementary file 18 lists all over-represented KEGG ontology in DEGs. [file 467395.f1.zip › 467395.f1/Additional file 17.xlsx]

## Sheet: CC
Additional file 17: Comparison of over-represented GO terms of “Cellular Component” in the leaves and the roots at 1 h and 12 h post-stress
GO Tem	Leaf_01hour_up-regulated	Leaf_01hour_down-regulated	Leaf_12hour_up-regulated	Leaf_12hour_down-regulated	Root_01hour_up-regulated	Root_01hour_down-regulated	Root_12hour_up-regulated	Root_12hour_down-regulated
actin cortical patch
actin cytoskeleton
actin filament bundle
anchoring collagen
cell leading edge
cell projection
collagen type VI
contractile fiber part
CRD-mediated mRNA stability complex
cytoplasmic membrane-bounded vesicle lumen
cytoskeleton
cytosol
cytosolic large ribosomal subunit
cytosolic part
endocytic vesicle membrane
endoplasmic reticulum lumen
endosome membrane
eukaryotic translation elongation factor 1 complex
extracellular matrix
extracellular organelle
extracellular region part
extracellular region
extracellular space
extracellular vesicular exosome
ferritin complex
fibrillar collagen
Golgi lumen
immunoglobulin complex
integrin complex
intermediate filament cytoskeleton
intermediate filament
intracellular ferritin complex
intracellular organelle part
intracellular part
intracellular
large ribosomal subunit
lipid particle
luminal surveillance complex
macromolecular complex
membrane-enclosed lumen
myosin II complex
nitrate reductase complex
non-membrane-bounded organelle
nuclear part
nucleus
organelle lumen
organelle part
perinuclear region of cytoplasm
pigment granule
polysomal ribosome
polysome
protein complex
protein serine/threonine phosphatase complex
protein-lipid complex
receptor complex
ribonucleoprotein complex
ribosome
ruffle
spherical high-density lipoprotein particle
transcription factor complex
vesicle lumen
vesicle
