# Supplementary material for: Comparative Transcriptome Analysis of Leaves and Roots in Response to Sudden Increase in Salinity in Brassica napus by RNA-seq
Source: Biomed Res Int. 2014 Aug 7;2014:467395. doi: 10.1155/2014/467395 (PMC4142189; doi:10.1155/2014/467395)
Supplement: Supplementary file 1 — is primer pair for qRT-PCR analysis. Supplementary file 2 indicates expression fold change of salt responsive gene markers in B. napus. Supplementary file 3 and 4 are tables indicating summary of sequencing output and statistics for the unigene of B. napus assembled by SOAPdenovo, respectively. Supplementary file 5 reveals annotations of all-unigenes. Supplementary file 6 is a graph depicting length distribution of the all-unigenes with SwissProt or NR annotations. Supplementary file 7 and 8 are GO and KEGG ontology classifications of all-unigenes, respectively. Supplementary file 9 shows comparison of transcription factor families between B. napus, Arabidopsis and B. rapa. Supplementary file 10 indicates log2 fold-changes of DEGs in the leaves and the roots at 1h and 12h. Supplementary file 11 shows Venn diagrams depicting number of DEGs regulated in the leaves and the roots of B. napus. Supplementary file 12 shows the result of validation of DEGs by semi-qRT-PCR. Supplementary file 13 shows the comparison of expression fold-change for DEGs between N119 and Kirariboshi. Supplementary file 14 lists all over-represented GO terms in DEGs. Supplementary file 15, 16 and 17 indicate comparison of over-represented GO terms of “Biological Process”, “Molecular Function”, and “Cellular Component”, respectively in the leaves and the roots at 1h and 12h after stress. Supplementary file 18 lists all over-represented KEGG ontology in DEGs. [file 467395.f1.zip › 467395.f1/Additional file 18.xlsx]

## Sheet: 1
Additional file 18.1: Over-represented KEGG ontology in up-regulated DEGs in the leaves at 1 h
Description	DEG Frequency	Genome frequency	p-value	corrected p-value
Plant hormone signal transduction	98 out of 733, 13.37%	1038 out of 27704, 3.75%	3.4767e-28	5.1108e-26
Environmental Information Processing	159 out of 733, 21.69%	2806 out of 27704, 10.13%	7.6118e-21	5.5946e-19
Signal transduction	118 out of 733, 16.10%	1777 out of 27704, 6.41%	1.3458e-20	6.5944e-19
Transcription factors	71 out of 733, 9.69%	1104 out of 27704, 3.98%	5.5886e-12	2.0538e-10
Plant-pathogen interaction	39 out of 733, 5.32%	496 out of 27704, 1.79%	1.8188e-09	5.3472e-08
alpha-Linolenic acid metabolism	10 out of 733, 1.36%	34 out of 27704, 0.12%	1.1679e-08	2.8613e-07
Environmental adaptation	43 out of 733, 5.87%	627 out of 27704, 2.26%	1.6061e-08	3.3728e-07
Linoleic acid metabolism	9 out of 733, 1.23%	37 out of 27704, 0.13%	3.876e-07	7.1221e-06
Lipid metabolism	60 out of 733, 8.19%	1199 out of 27704, 4.33%	1.9498e-06	3.1846e-05
Carotenoid biosynthesis	14 out of 733, 1.91%	141 out of 27704, 0.51%	2.3812e-05	0.00035004
Organismal System	48 out of 733, 6.55%	1031 out of 27704, 3.72%	0.00012273	0.0016401
Transcription	98 out of 733, 13.37%	2584 out of 27704, 9.33%	0.00018006	0.0022058
Transporters	24 out of 733, 3.27%	424 out of 27704, 1.53%	0.00044527	0.005035
G protein-coupled receptors	7 out of 733, 0.95%	55 out of 27704, 0.20%	0.0005938	0.0062349
Flavonoid biosynthesis	5 out of 733, 0.68%	32 out of 27704, 0.12%	0.001424	0.013956
Cutin, suberine and wax biosynthesis	7 out of 733, 0.95%	76 out of 27704, 0.27%	0.0039738	0.035543
Amino sugar and nucleotide sugar metabolism	12 out of 733, 1.64%	186 out of 27704, 0.67%	0.0041105	0.035543
Biosynthesis of other secondary metabolites	14 out of 733, 1.91%	247 out of 27704, 0.89%	0.0064014	0.052278
Glycine, serine and threonine metabolism	8 out of 733, 1.09%	109 out of 27704, 0.39%	0.0084601	0.063542
Glycerophospholipid metabolism	14 out of 733, 1.91%	256 out of 27704, 0.92%	0.0086451	0.063542
Amino acid metabolism	47 out of 733, 6.41%	1241 out of 27704, 4.48%	0.0091082	0.063757
Metabolism of terpenoids and polyketides	28 out of 733, 3.82%	659 out of 27704, 2.38%	0.010105	0.067518
Membrane transport	25 out of 733, 3.41%	579 out of 27704, 2.09%	0.012098	0.077321
Nitrogen metabolism	8 out of 733, 1.09%	117 out of 27704, 0.42%	0.012663	0.077562
SNARE interactions in vesicular transport	11 out of 733, 1.50%	192 out of 27704, 0.69%	0.013624	0.080109
Ascorbate and aldarate metabolism	6 out of 733, 0.82%	80 out of 27704, 0.29%	0.019356	0.10944
Fatty acid metabolism	8 out of 733, 1.09%	131 out of 27704, 0.47%	0.023411	0.12746
Metabolism	347 out of 733, 47.34%	12132 out of 27704, 43.79%	0.02735	0.14359
Pyrimidine metabolism	9 out of 733, 1.23%	172 out of 27704, 0.62%	0.039943	0.20247
Calcium signaling pathway	7 out of 733, 0.95%	125 out of 27704, 0.45%	0.048657	0.23842
Phenylalanine, tyrosine and tryptophan biosynthesis	7 out of 733, 0.95%	130 out of 27704, 0.47%	0.057763	0.27391
Notch signaling pathway	3 out of 733, 0.41%	37 out of 27704, 0.13%	0.073856	0.33928
Phenylalanine metabolism	10 out of 733, 1.36%	230 out of 27704, 0.83%	0.086253	0.3801
GABAergic synapse	2 out of 733, 0.27%	19 out of 27704, 0.07%	0.088896	0.3801
Tropane, piperidine and pyridine alkaloid biosynthesis	5 out of 733, 0.68%	90 out of 27704, 0.32%	0.090501	0.3801
beta-Alanine metabolism	1 out of 733, 0.14%	4 out of 27704, 0.01%	0.10171	0.40531
Arginine and proline metabolism	7 out of 733, 0.95%	151 out of 27704, 0.55%	0.10679	0.40531
Sesquiterpenoid and triterpenoid biosynthesis	4 out of 733, 0.55%	69 out of 27704, 0.25%	0.11002	0.40531
Methane metabolism	4 out of 733, 0.55%	69 out of 27704, 0.25%	0.11002	0.40531
Alanine, aspartate and glutamate metabolism	3 out of 733, 0.41%	44 out of 27704, 0.16%	0.11029	0.40531
Monoterpenoid biosynthesis	2 out of 733, 0.27%	23 out of 27704, 0.08%	0.12288	0.44058

## Sheet: 2
Additional file 18.2: Over-represented KEGG ontology in down-regulated DEGs in the leaves at 1 h.
Description	DEG Frequency	Genome frequency	p-value	corr p-value
PI3K-Akt signaling pathway	10 out of 295, 3.39%	99 out of 27704, 0.36%	1.0878e-07	1.4359e-05
Signal transduction	32 out of 295, 10.85%	1777 out of 27704, 6.41%	0.0026109	0.10778
NF-kappa B signaling pathway	3 out of 295, 1.02%	29 out of 27704, 0.10%	0.0035577	0.10778
Oxidative phosphorylation	17 out of 295, 5.76%	765 out of 27704, 2.76%	0.0036841	0.10778
Butanoate metabolism	4 out of 295, 1.36%	61 out of 27704, 0.22%	0.0040826	0.10778
Regulation of actin cytoskeleton	5 out of 295, 1.69%	107 out of 27704, 0.39%	0.0058185	0.12801
Cyanoamino acid metabolism	2 out of 295, 0.68%	12 out of 27704, 0.04%	0.0069508	0.13107
Energy metabolism	24 out of 295, 8.14%	1338 out of 27704, 4.83%	0.0091768	0.15142
Monoterpenoid biosynthesis	2 out of 295, 0.68%	23 out of 27704, 0.08%	0.024674	0.36189
Taurine and hypotaurine metabolism	2 out of 295, 0.68%	26 out of 27704, 0.09%	0.031043	0.40977
Pyrimidine metabolism	5 out of 295, 1.69%	172 out of 27704, 0.62%	0.037356	0.44342
Ubiquitin mediated proteolysis	9 out of 295, 3.05%	427 out of 27704, 1.54%	0.040311	0.44342
Cell motility	6 out of 295, 2.03%	241 out of 27704, 0.87%	0.044915	0.44875
Cutin, suberine and wax biosynthesis	3 out of 295, 1.02%	76 out of 27704, 0.27%	0.047595	0.44875

## Sheet: 3
Additional file 18.3: Over-represented KEGG ontology in up-regulated DEGs in the leaves at 12 h.
Description	DEG Frequency	Genome frequency	p-value	corr p-value
Galactose metabolism	7 out of 318, 2.20%	122 out of 27704, 0.44%	0.00053377	0.070458
Spliceosome	21 out of 318, 6.60%	984 out of 27704, 3.55%	0.0050754	0.20663
Transcription	44 out of 318, 13.84%	2584 out of 27704, 9.33%	0.0053475	0.20663
Lysine degradation	2 out of 318, 0.63%	11 out of 27704, 0.04%	0.0067461	0.20663
Tyrosine metabolism	3 out of 318, 0.94%	37 out of 27704, 0.13%	0.0087239	0.20663
mTOR signaling pathway	3 out of 318, 0.94%	38 out of 27704, 0.14%	0.0093924	0.20663
Signal transduction	31 out of 318, 9.75%	1777 out of 27704, 6.41%	0.013602	0.2565
Metabolism of cofactors and vitamins	13 out of 318, 4.09%	604 out of 27704, 2.18%	0.023187	0.31532
SNARE interactions in vesicular transport	6 out of 318, 1.89%	192 out of 27704, 0.69%	0.023871	0.31532
Vitamin B6 metabolism	2 out of 318, 0.63%	21 out of 27704, 0.08%	0.023888	0.31532
PI3K-Akt signaling pathway	4 out of 318, 1.26%	99 out of 27704, 0.36%	0.027411	0.32894
Zeatin biosynthesis	3 out of 318, 0.94%	69 out of 27704, 0.25%	0.045075	0.40346
Pyrimidine metabolism	5 out of 318, 1.57%	172 out of 27704, 0.62%	0.048786	0.40346
Amino acid metabolism	21 out of 318, 6.60%	1241 out of 27704, 4.48%	0.050143	0.40346
Retinol metabolism	1 out of 318, 0.31%	5 out of 27704, 0.02%	0.056094	0.40346
Calcium signaling pathway	4 out of 318, 1.26%	125 out of 27704, 0.45%	0.056254	0.40346
Environmental adaptation	12 out of 318, 3.77%	627 out of 27704, 2.26%	0.059482	0.40346
Valine, leucine and isoleucine degradation	3 out of 318, 0.94%	79 out of 27704, 0.29%	0.06267	0.40346
Phenylalanine, tyrosine and tryptophan biosynthesis	4 out of 318, 1.26%	130 out of 27704, 0.47%	0.06314	0.40346
Riboflavin metabolism	2 out of 318, 0.63%	36 out of 27704, 0.13%	0.064092	0.40346
Environmental Information Processing	41 out of 318, 12.89%	2806 out of 27704, 10.13%	0.064188	0.40346
Replication and repair	19 out of 318, 5.97%	1156 out of 27704, 4.17%	0.075494	0.45296

## Sheet: 4
Additional file 18.4: Over-represented KEGG ontology in down-regulated DEGs in the leaves at 12 h.
Description	DEG Frequency	Genome frequency	p-value	corr p-value
Metabolism	182 out of 314, 57.96%	12132 out of 27704, 43.79%	2.7417e-07	3.7013e-05
Methane metabolism	5 out of 314, 1.59%	69 out of 27704, 0.25%	0.0011255	0.075972
Cutin, suberine and wax biosynthesis	5 out of 314, 1.59%	76 out of 27704, 0.27%	0.0017351	0.078078
Energy metabolism	27 out of 314, 8.60%	1338 out of 27704, 4.83%	0.0028521	0.096257
Environmental adaptation	15 out of 314, 4.78%	627 out of 27704, 2.26%	0.0056277	0.15195
Cyanoamino acid metabolism	2 out of 314, 0.64%	12 out of 27704, 0.04%	0.0078407	0.16315
Glyoxylate and dicarboxylate metabolism	7 out of 314, 2.23%	202 out of 27704, 0.73%	0.0084598	0.16315
Plant-pathogen interaction	12 out of 314, 3.82%	496 out of 27704, 1.79%	0.011598	0.19572
Amino acid metabolism	23 out of 314, 7.32%	1241 out of 27704, 4.48%	0.014802	0.22203
Proximal tubule bicarbonate reclamation	1 out of 314, 0.32%	2 out of 27704, 0.01%	0.02254	0.2833
Biosynthesis of other secondary metabolites	7 out of 314, 2.23%	247 out of 27704, 0.89%	0.023083	0.2833
Tryptophan metabolism	3 out of 314, 0.96%	58 out of 27704, 0.21%	0.028149	0.31668
Metabolism of other amino acids	5 out of 314, 1.59%	155 out of 27704, 0.56%	0.032066	0.33299
Taurine and hypotaurine metabolism	2 out of 314, 0.64%	26 out of 27704, 0.09%	0.0348	0.33557
Other glycan degradation	2 out of 314, 0.64%	30 out of 27704, 0.11%	0.045227	0.38234
Organismal System	18 out of 314, 5.73%	1031 out of 27704, 3.72%	0.047379	0.38234
Circadian rhythm	1 out of 314, 0.32%	5 out of 27704, 0.02%	0.055404	0.38234
Peptidoglycan biosynthesis	1 out of 314, 0.32%	5 out of 27704, 0.02%	0.055404	0.38234
Lipid metabolism	20 out of 314, 6.37%	1199 out of 27704, 4.33%	0.055758	0.38234
alpha-Linolenic acid metabolism	2 out of 314, 0.64%	34 out of 27704, 0.12%	0.056643	0.38234
Valine, leucine and isoleucine degradation	3 out of 314, 0.96%	79 out of 27704, 0.29%	0.060807	0.3909
Sulfur metabolism	4 out of 314, 1.27%	133 out of 27704, 0.48%	0.065047	0.39427
Membrane transport	11 out of 314, 3.50%	579 out of 27704, 2.09%	0.067172	0.39427
Anthocyanin biosynthesis	1 out of 314, 0.32%	7 out of 27704, 0.03%	0.076699	0.41338
Pentose and glucuronate interconversions	4 out of 314, 1.27%	141 out of 27704, 0.51%	0.076957	0.41338
Chaperones and folding catalysts	4 out of 314, 1.27%	144 out of 27704, 0.52%	0.081687	0.41338
Tropane, piperidine and pyridine alkaloid biosynthesis	3 out of 314, 0.96%	90 out of 27704, 0.32%	0.082676	0.41338

## Sheet: 5
Additional file 18.5: Over-represented KEGG ontology in up-regulated DEGs in the roots at 1 h.
Description	DEG Frequency	Genome frequency	p-value	corr p-value
Signal transduction	76 out of 668, 11.38%	1777 out of 27704, 6.41%	8.9045e-07	0.0001398
alpha-Linolenic acid metabolism	7 out of 668, 1.05%	34 out of 27704, 0.12%	1.4015e-05	0.00076673
Plant hormone signal transduction	48 out of 668, 7.19%	1038 out of 27704, 3.75%	1.4651e-05	0.00076673
Environmental Information Processing	97 out of 668, 14.52%	2806 out of 27704, 10.13%	0.00018277	0.0071736
Transcription factors	46 out of 668, 6.89%	1104 out of 27704, 3.98%	0.00025067	0.0078711
Glutathione metabolism	9 out of 668, 1.35%	95 out of 27704, 0.34%	0.00048528	0.012698
Transcription	86 out of 668, 12.87%	2584 out of 27704, 9.33%	0.0013804	0.027524
Vitamin B6 metabolism	4 out of 668, 0.60%	21 out of 27704, 0.08%	0.001446	0.027524
Carbohydrate metabolism	86 out of 668, 12.87%	2596 out of 27704, 9.37%	0.0015778	0.027524
Carotenoid biosynthesis	10 out of 668, 1.50%	141 out of 27704, 0.51%	0.002273	0.035686
Propanoate metabolism	6 out of 668, 0.90%	64 out of 27704, 0.23%	0.0044052	0.062875
MAPK signaling pathway - yeast	3 out of 668, 0.45%	15 out of 27704, 0.05%	0.0051139	0.066801
Peptidoglycan biosynthesis	2 out of 668, 0.30%	5 out of 27704, 0.02%	0.0055313	0.066801
Antigen processing and presentation	3 out of 668, 0.45%	17 out of 27704, 0.06%	0.0073742	0.082697
Linoleic acid metabolism	4 out of 668, 0.60%	37 out of 27704, 0.13%	0.01178	0.11101
Biosynthesis of unsaturated fatty acids	5 out of 668, 0.75%	58 out of 27704, 0.21%	0.012863	0.11101
Metabolism of other amino acids	9 out of 668, 1.35%	155 out of 27704, 0.56%	0.013125	0.11101
Two-component system	3 out of 668, 0.45%	21 out of 27704, 0.08%	0.013431	0.11101
Protein processing in endoplasmic reticulum	21 out of 668, 3.14%	512 out of 27704, 1.85%	0.013435	0.11101
Immune system	5 out of 668, 0.75%	64 out of 27704, 0.23%	0.019047	0.14952
Spliceosome	34 out of 668, 5.09%	984 out of 27704, 3.55%	0.023679	0.17633
Glycolysis / Gluconeogenesis	20 out of 668, 2.99%	512 out of 27704, 1.85%	0.024708	0.17633
Calcium signaling pathway	7 out of 668, 1.05%	125 out of 27704, 0.45%	0.032036	0.21868
Amino sugar and nucleotide sugar metabolism	9 out of 668, 1.35%	186 out of 27704, 0.67%	0.037082	0.24258
Other types of O-glycan biosynthesis	2 out of 668, 0.30%	14 out of 27704, 0.05%	0.043613	0.27389
Fructose and mannose metabolism	6 out of 668, 0.90%	111 out of 27704, 0.40%	0.052265	0.3156
Butanoate metabolism	4 out of 668, 0.60%	61 out of 27704, 0.22%	0.059549	0.34627
Regulation of autophagy	4 out of 668, 0.60%	64 out of 27704, 0.23%	0.068618	0.36952
Peptidases	2 out of 668, 0.30%	18 out of 27704, 0.06%	0.068862	0.36952
Jak-STAT signaling pathway	1 out of 668, 0.15%	3 out of 27704, 0.01%	0.070608	0.36952
Neuroactive ligand-receptor interaction	2 out of 668, 0.30%	20 out of 27704, 0.07%	0.082888	0.41979

## Sheet: 6
Additional file 18.6: Over-represented KEGG ontology in down-regulated DEGs in the roost at 1 h.
Description	DEG Frequency	Genome frequency	p-value	corr p-value
Ubiquitin system	8 out of 330, 2.42%	180 out of 27704, 0.65%	0.0014817	0.1941
Glucosinolate biosynthesis	3 out of 330, 0.91%	35 out of 27704, 0.13%	0.0082687	0.28672
Arginine and proline metabolism	6 out of 330, 1.82%	151 out of 27704, 0.55%	0.0096323	0.28672
Signal transduction	32 out of 330, 9.70%	1777 out of 27704, 6.41%	0.013239	0.28672
Plant hormone signal transduction	21 out of 330, 6.36%	1038 out of 27704, 3.75%	0.013341	0.28672
Ubiquitin mediated proteolysis	11 out of 330, 3.33%	427 out of 27704, 1.54%	0.014028	0.28672
Calcium signaling pathway	5 out of 330, 1.52%	125 out of 27704, 0.45%	0.017115	0.28672
Aminoacyl-tRNA biosynthesis	7 out of 330, 2.12%	222 out of 27704, 0.80%	0.01751	0.28672
Amino acid metabolism	23 out of 330, 6.97%	1241 out of 27704, 4.48%	0.024839	0.33906
Purine metabolism	11 out of 330, 3.33%	469 out of 27704, 1.69%	0.025882	0.33906

## Sheet: 7
Additional file 18.7: Over-represented KEGG ontology in up-regulated DEGs in the roots at 12 h.
Description	DEG Frequency	Genome frequency	p-value	corr p-value
Glycolysis / Gluconeogenesis	34 out of 567, 6.00%	512 out of 27704, 1.85%	2.3305e-09	1.0876e-07
Ribosome	66 out of 567, 11.64%	1696 out of 27704, 6.12%	4.2383e-07	1.4834e-05
Taurine and hypotaurine metabolism	7 out of 567, 1.23%	26 out of 27704, 0.09%	6.8017e-07	1.9045e-05
Carbohydrate metabolism	83 out of 567, 14.64%	2596 out of 27704, 9.37%	3.016e-05	0.00070374
TGF-beta signaling pathway	2 out of 567, 0.35%	2 out of 27704, 0.01%	0.00041815	0.0074206
Membrane transport	25 out of 567, 4.41%	579 out of 27704, 2.09%	0.00042403	0.0074206
Transporters	20 out of 567, 3.53%	424 out of 27704, 1.53%	0.00052724	0.0082016
Environmental Information Processing	80 out of 567, 14.11%	2806 out of 27704, 10.13%	0.0014793	0.018828
Pentose phosphate pathway	9 out of 567, 1.59%	136 out of 27704, 0.49%	0.0019908	0.023226
Pentose and glucuronate interconversions	9 out of 567, 1.59%	141 out of 27704, 0.51%	0.0025448	0.027406
Metabolism of other amino acids	9 out of 567, 1.59%	155 out of 27704, 0.56%	0.0047631	0.047631
Signal transduction	51 out of 567, 8.99%	1777 out of 27704, 6.41%	0.0095076	0.087355
Immune system	5 out of 567, 0.88%	64 out of 27704, 0.23%	0.0099834	0.087355
Tight junction	3 out of 567, 0.53%	25 out of 27704, 0.09%	0.014034	0.11557
Cell communication	3 out of 567, 0.53%	26 out of 27704, 0.09%	0.015628	0.11934
PI3K-Akt signaling pathway	6 out of 567, 1.06%	99 out of 27704, 0.36%	0.016197	0.11934
Steroid biosynthesis	6 out of 567, 1.06%	102 out of 27704, 0.37%	0.018504	0.12953
Organismal System	30 out of 567, 5.29%	1031 out of 27704, 3.72%	0.034938	0.23292
Hematopoietic cell lineage	1 out of 567, 0.18%	2 out of 27704, 0.01%	0.040515	0.25782
Circadian rhythm - plant	6 out of 567, 1.06%	126 out of 27704, 0.45%	0.045298	0.27573
Glyoxylate and dicarboxylate metabolism	8 out of 567, 1.41%	202 out of 27704, 0.73%	0.056909	0.33197
Carbon fixation in photosynthetic organisms	3 out of 567, 0.53%	47 out of 27704, 0.17%	0.071362	0.39963
Cardiac muscle contraction	1 out of 567, 0.18%	4 out of 27704, 0.01%	0.07939	0.41355
Monoterpenoid biosynthesis	2 out of 567, 0.35%	23 out of 27704, 0.08%	0.079756	0.41355
Plant hormone signal transduction	28 out of 567, 4.94%	1038 out of 27704, 3.75%	0.08507	0.42535

## Sheet: 8
Additional file 18.8: Over-represented KEGG ontology in down-regulated DEGs in the roots at 12 h.
Description	DEG Frequency	Genome frequency	p-value	corr p-value
Metabolism	219 out of 409, 53.55%	12132 out of 27704, 43.79%	4.117e-05	0.0057638
Energy metabolism	38 out of 409, 9.29%	1338 out of 27704, 4.83%	9.7538e-05	0.0068276
Phenylpropanoid biosynthesis	5 out of 409, 1.22%	54 out of 27704, 0.19%	0.0011948	0.045451
G protein-coupled receptors	5 out of 409, 1.22%	55 out of 27704, 0.20%	0.0012986	0.045451
Biosynthesis of other secondary metabolites	10 out of 409, 2.44%	247 out of 27704, 0.89%	0.0038913	0.10896
Oxidative phosphorylation	21 out of 409, 5.13%	765 out of 27704, 2.76%	0.0051787	0.12084
Nitrogen metabolism	6 out of 409, 1.47%	117 out of 27704, 0.42%	0.0079097	0.15819
Glucosinolate biosynthesis	3 out of 409, 0.73%	35 out of 27704, 0.13%	0.014738	0.25792
Methane metabolism	4 out of 409, 0.98%	69 out of 27704, 0.25%	0.019068	0.29662
Arginine and proline metabolism	6 out of 409, 1.47%	151 out of 27704, 0.55%	0.024951	0.33264
Cutin, suberine and wax biosynthesis	4 out of 409, 0.98%	76 out of 27704, 0.27%	0.026136	0.33264
Ascorbate and aldarate metabolism	4 out of 409, 0.98%	80 out of 27704, 0.29%	0.030793	0.33544
Lipid metabolism	26 out of 409, 6.36%	1199 out of 27704, 4.33%	0.033544	0.33544
Calcium signaling pathway	5 out of 409, 1.22%	125 out of 27704, 0.45%	0.038193	0.34217
Transcription factors	24 out of 409, 5.87%	1104 out of 27704, 3.98%	0.039105	0.34217
Glycerolipid metabolism	6 out of 409, 1.47%	178 out of 27704, 0.64%	0.049212	0.38276
Phenylalanine metabolism	7 out of 409, 1.71%	230 out of 27704, 0.83%	0.055386	0.40433
Adipocytokine signaling pathway	1 out of 409, 0.24%	4 out of 27704, 0.01%	0.057761	0.40433
Signaling molecules and interaction	11 out of 409, 2.69%	450 out of 27704, 1.62%	0.072009	0.48006
