# Supplementary figures and images for: Comparative Transcriptome Analysis of Leaves and Roots in Response to Sudden Increase in Salinity inBrassica napusby RNA-seq
Source: Hindawi journal article supplement (doi:10.1155/2014/467395), 2014-01-01

**Additional file 8: KEGG ontology classification of *B. napus* transcriptome.**

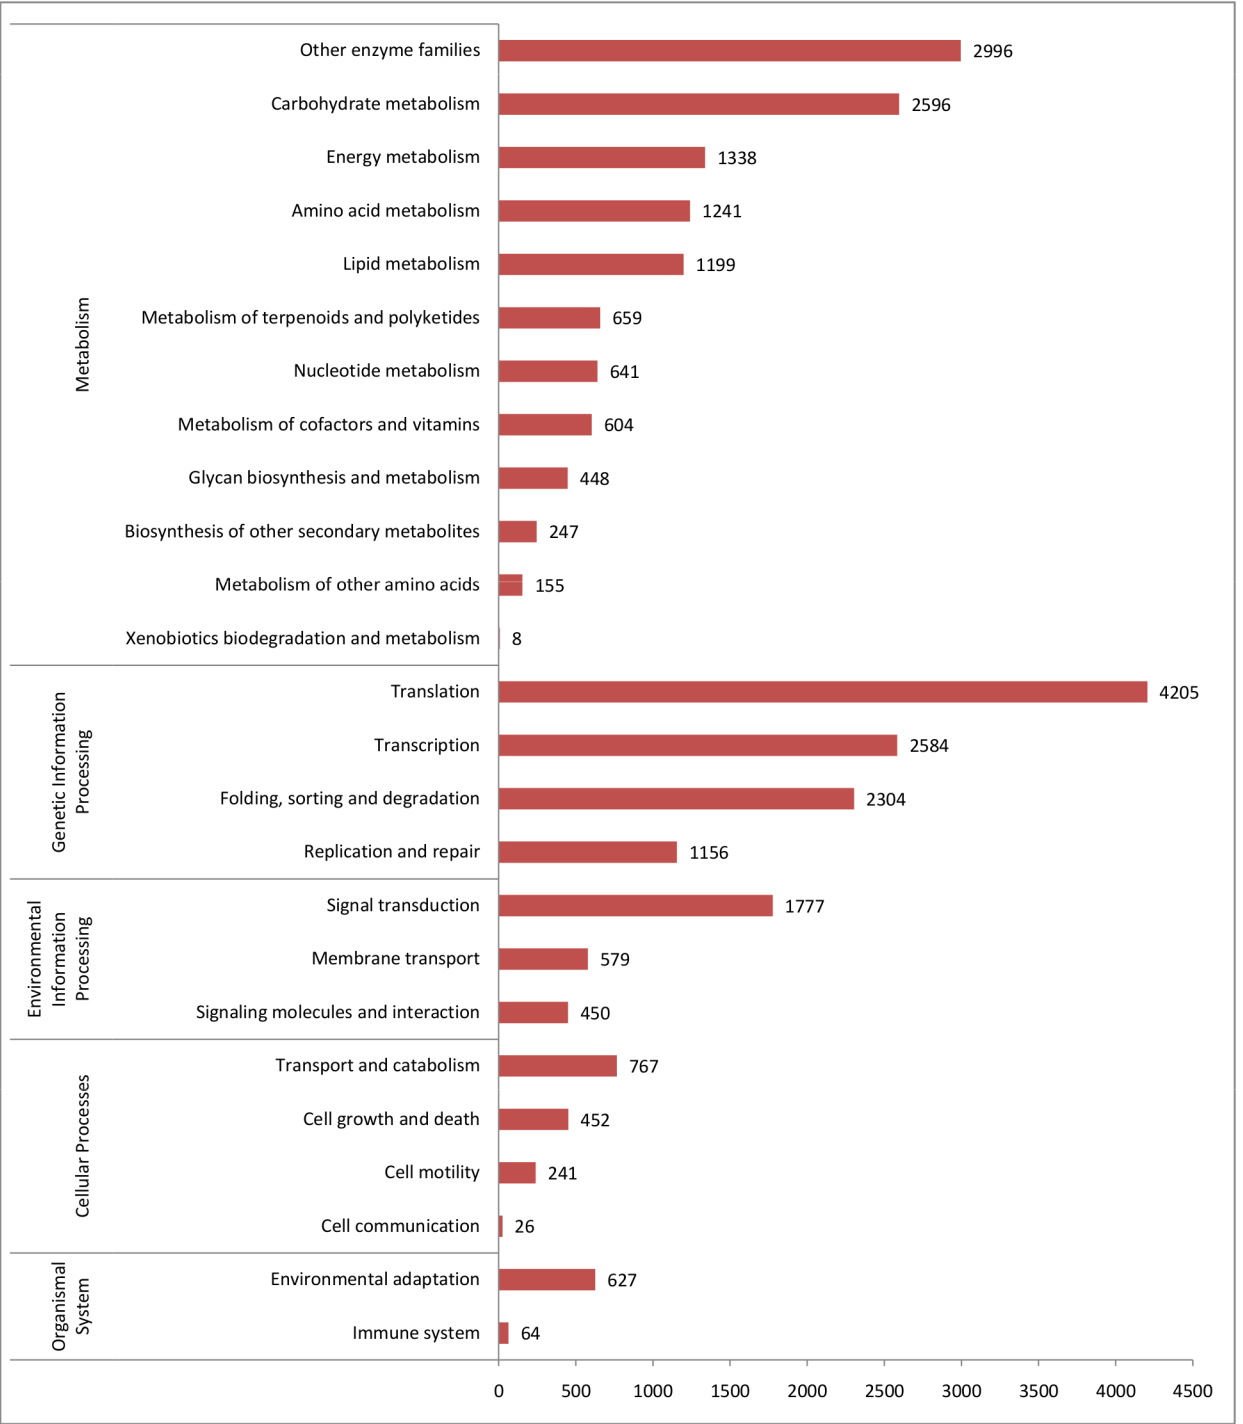

Supplement: f1 [file 467395.f1.zip]

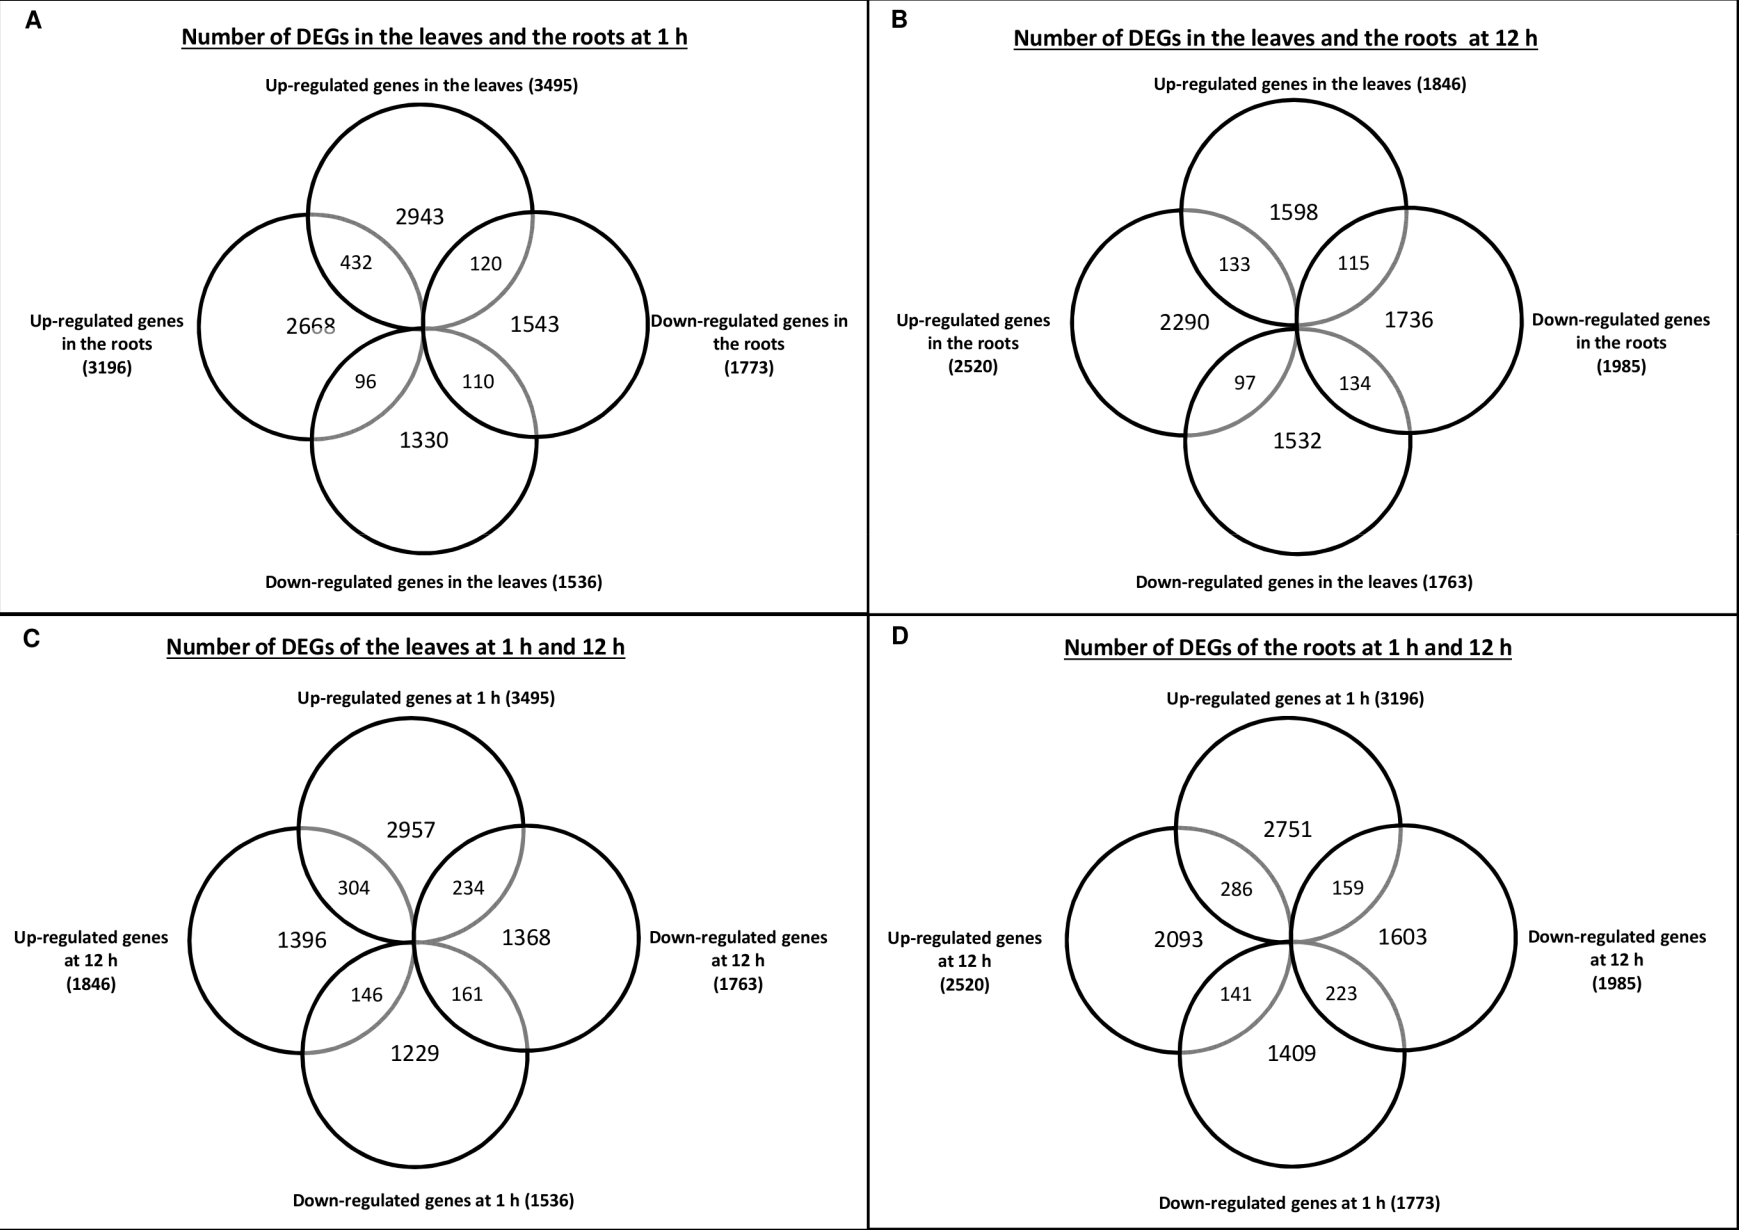

Supplement: f1 [file 467395.f1.zip]

Additional file 7: GO classification of *B. napus* transcriptome.

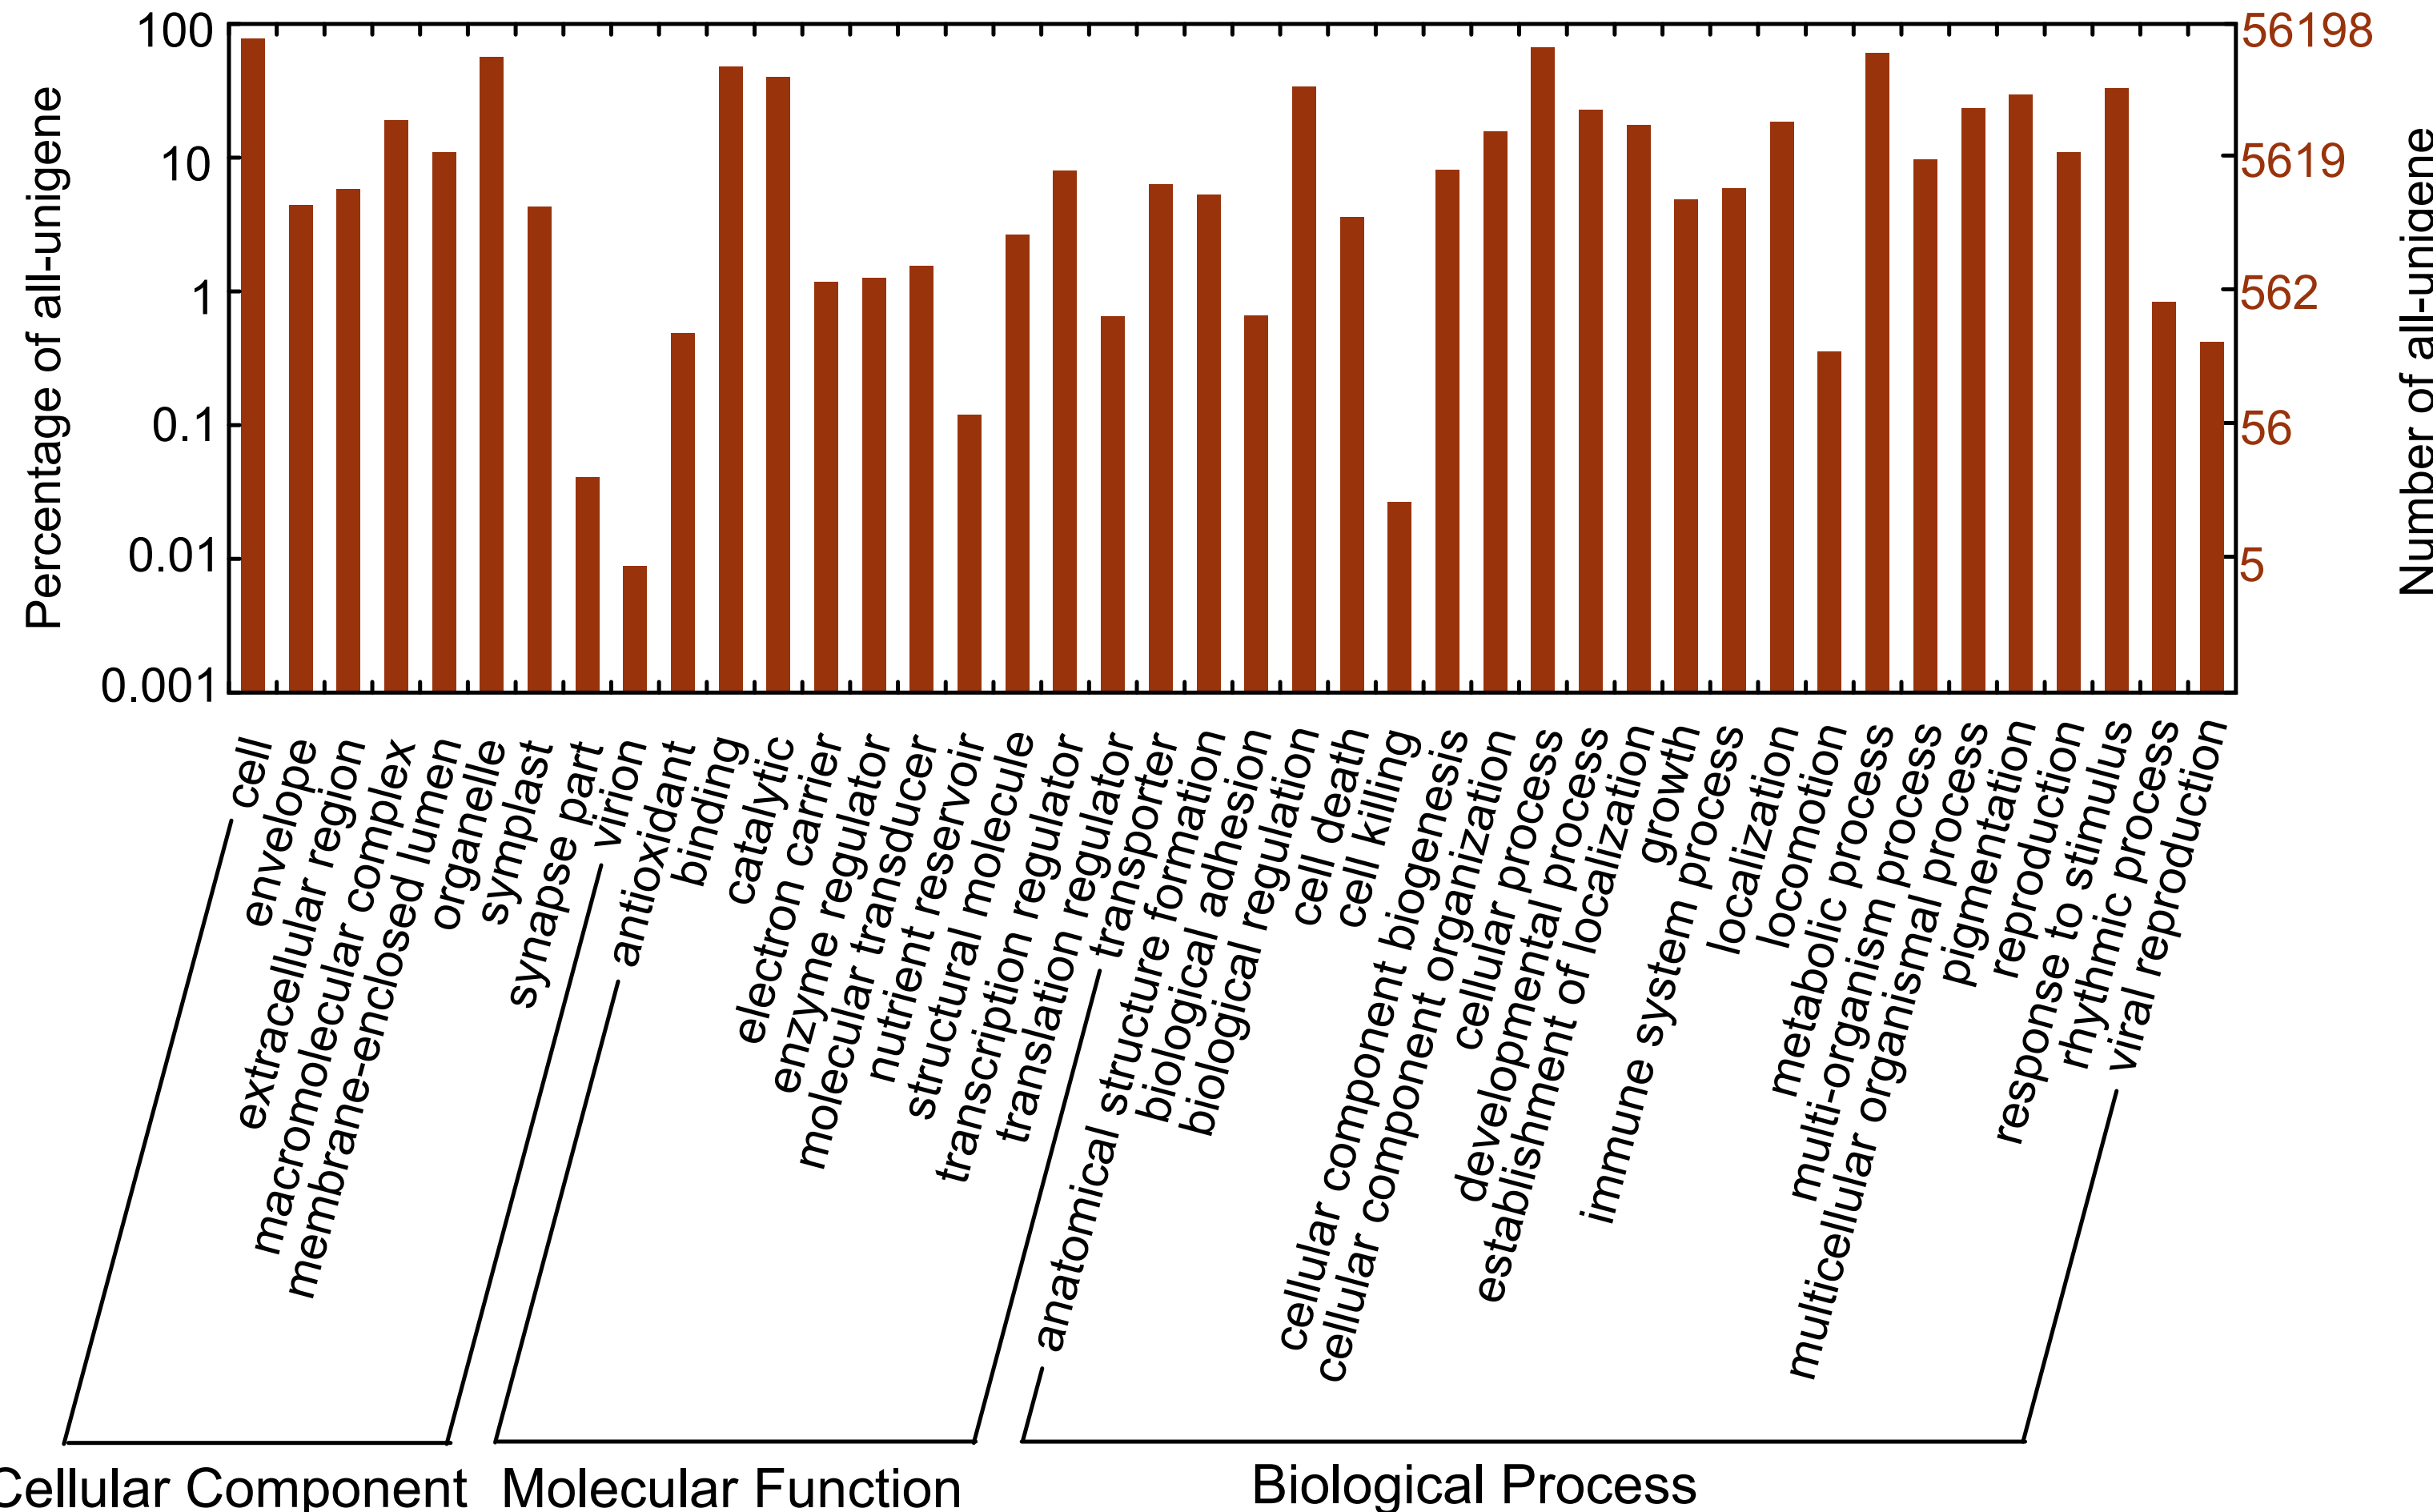

Supplement: f1 [file 467395.f1.zip]

Additional file 12: Comparison of expression fold-change for DEGs between N119 and Kirariboshi.

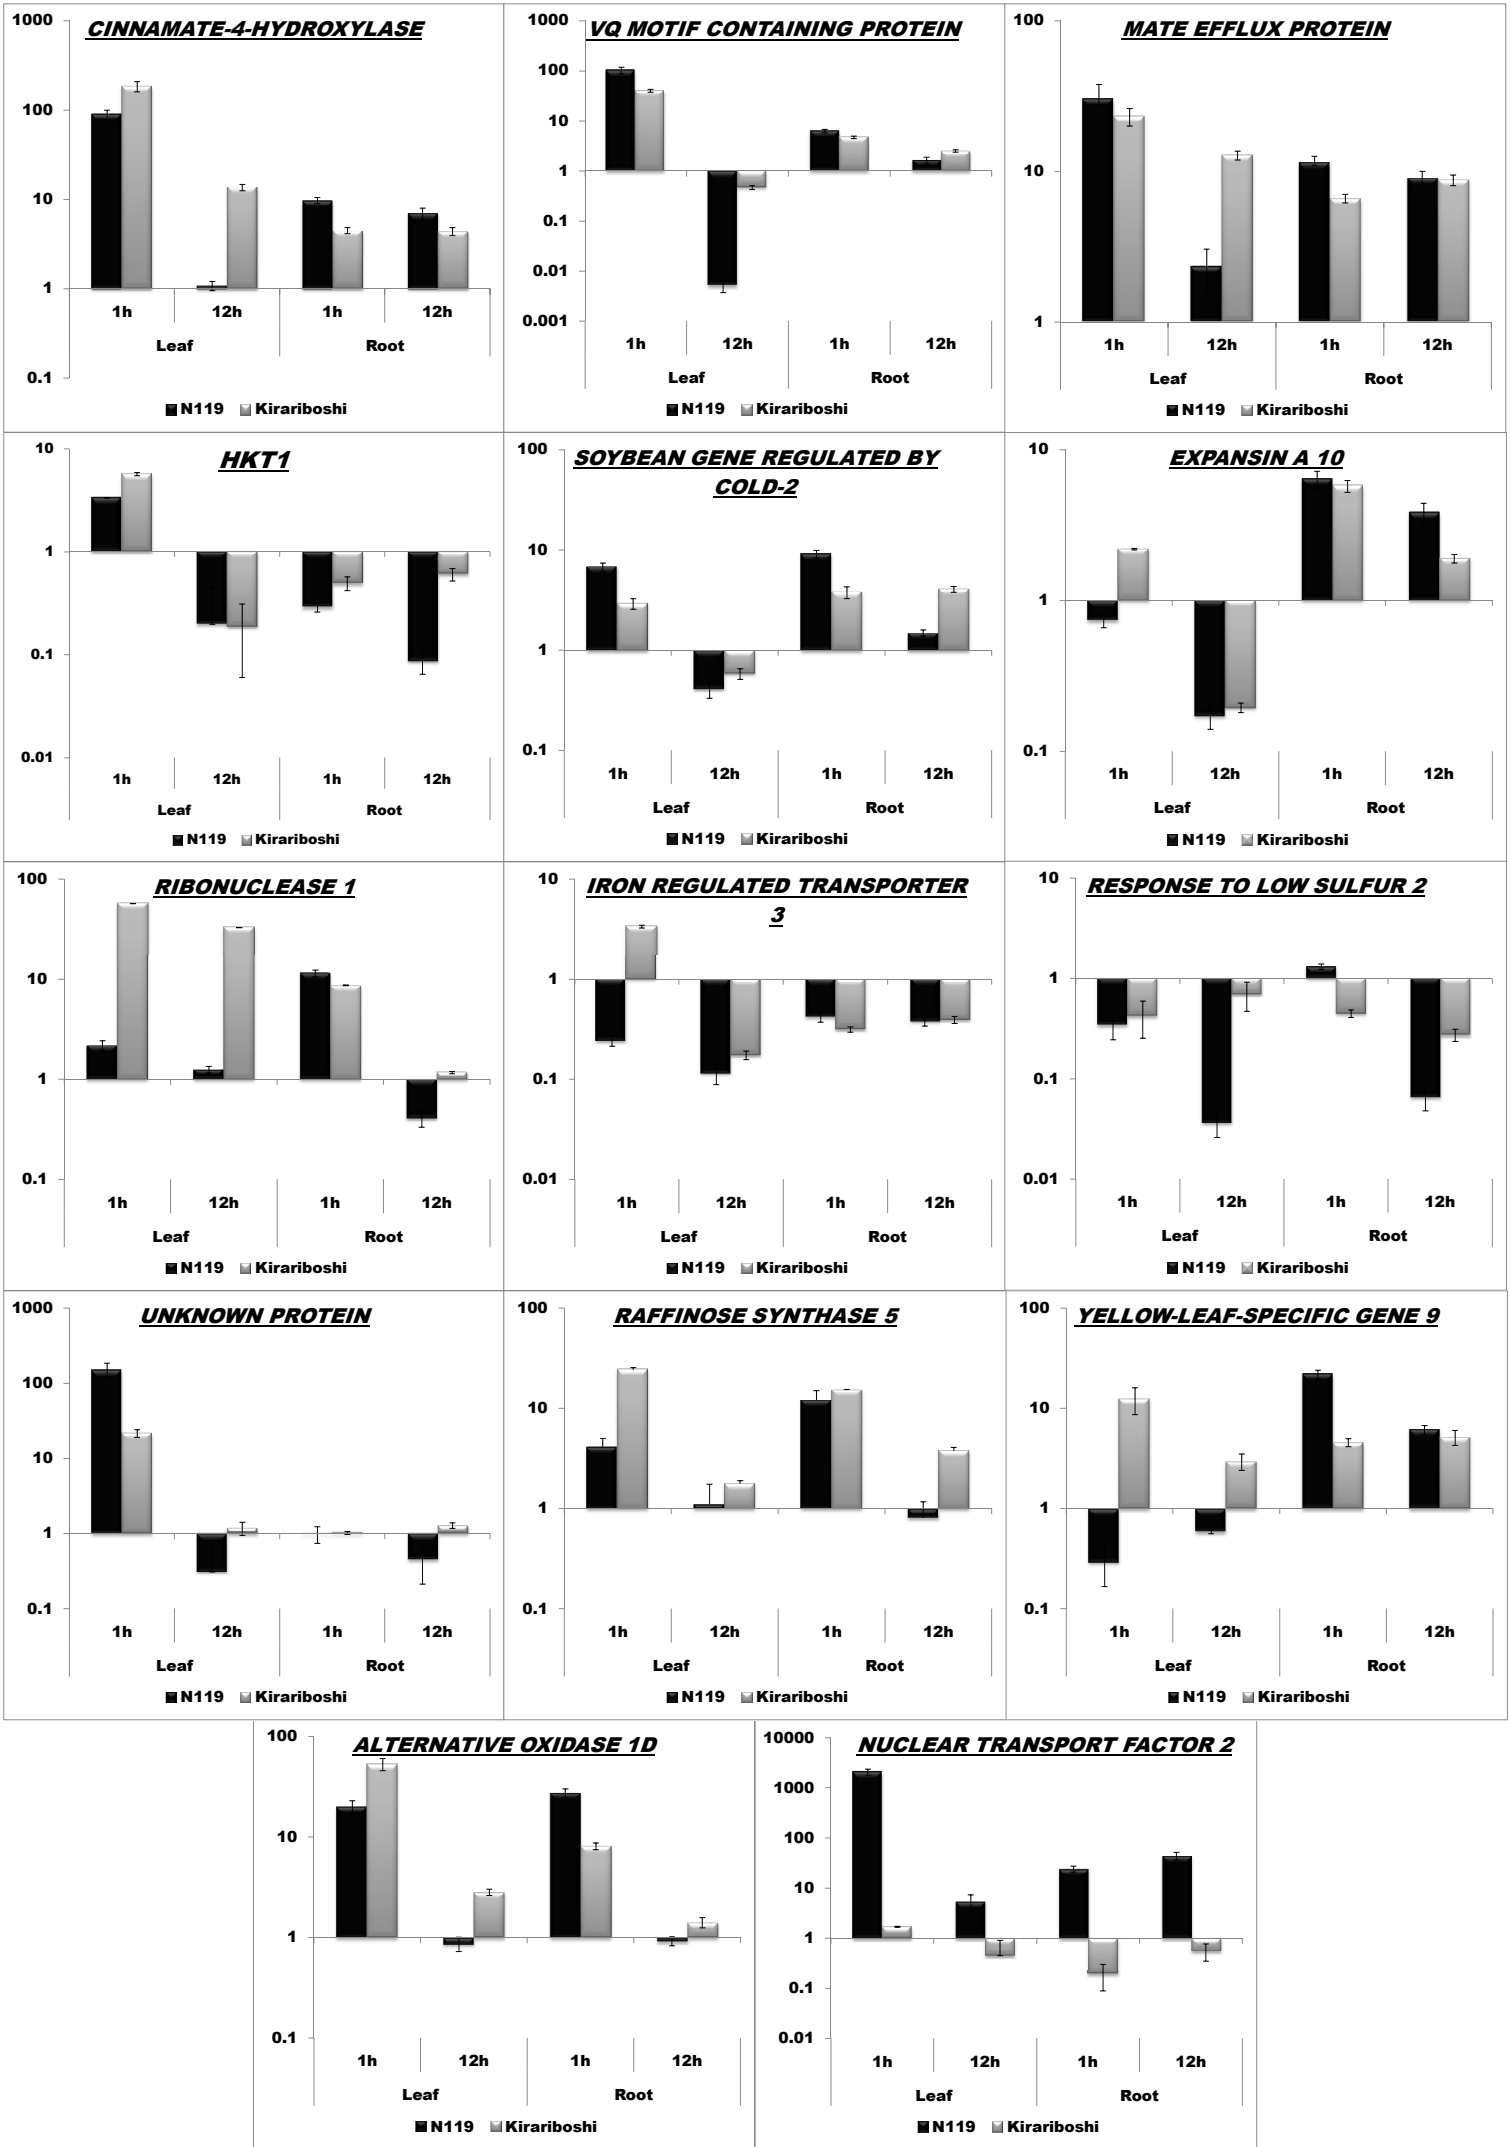

Supplement: f1 [file 467395.f1.zip]

Additional file 2: Expression fold change of salt responsive gene markers in *B. napus*.

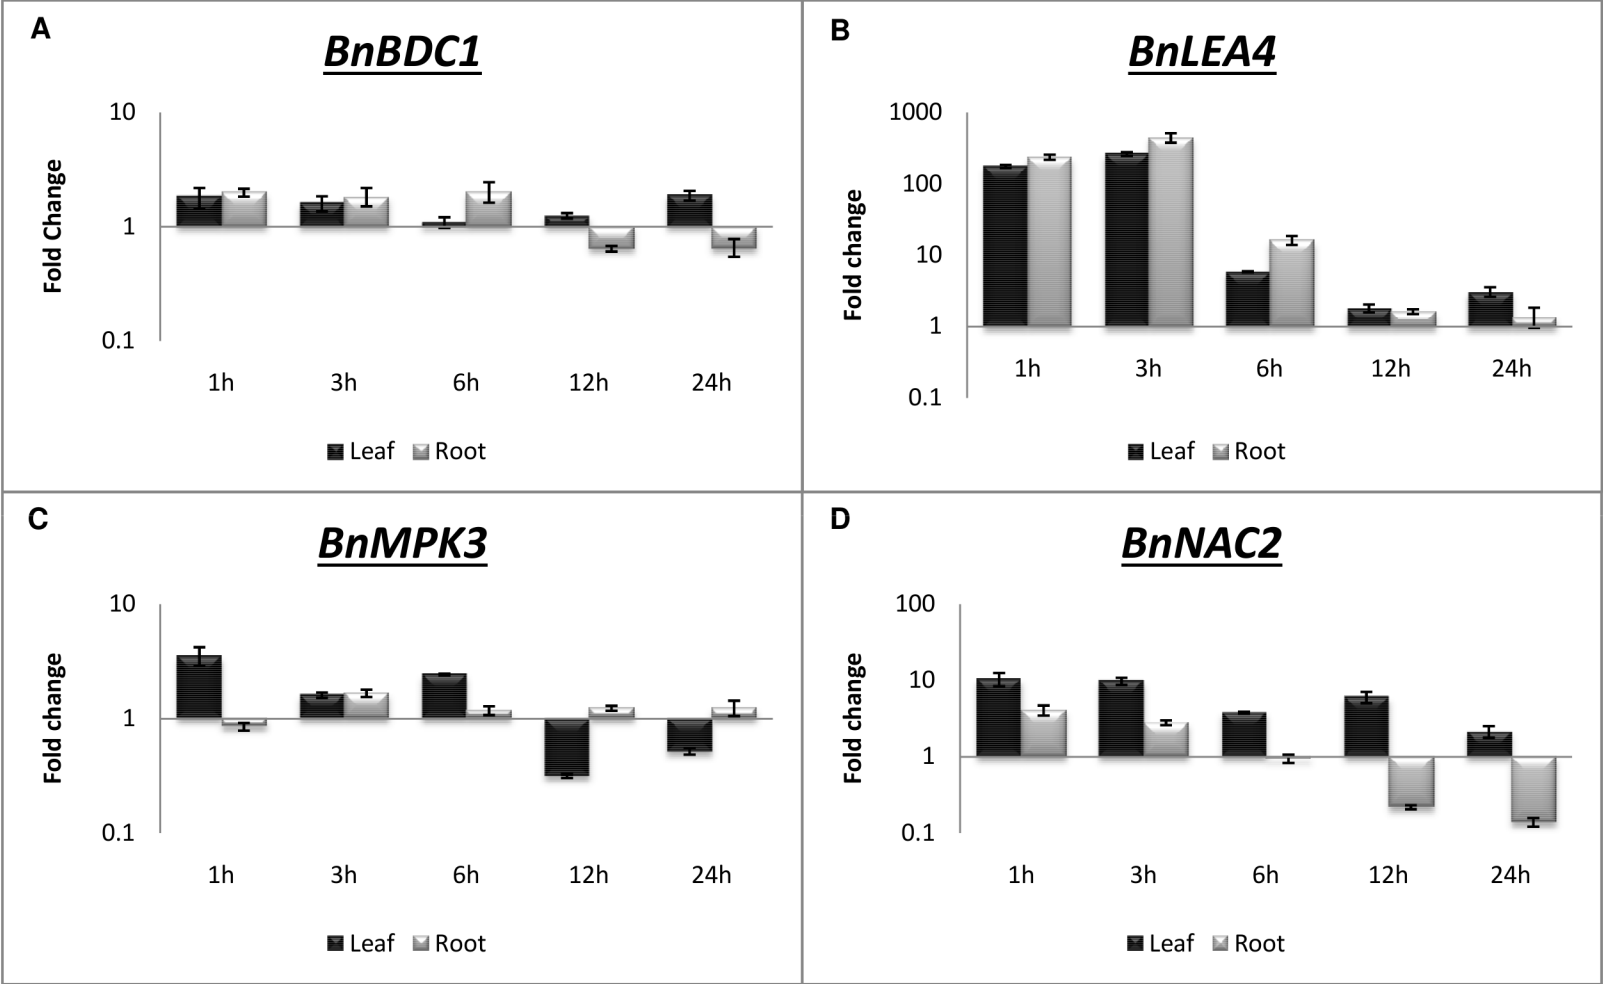

Supplement: f1 [file 467395.f1.zip]

**Additional file 6: Length distribution of the all-unigenes with SwissProt or NR annotations.**

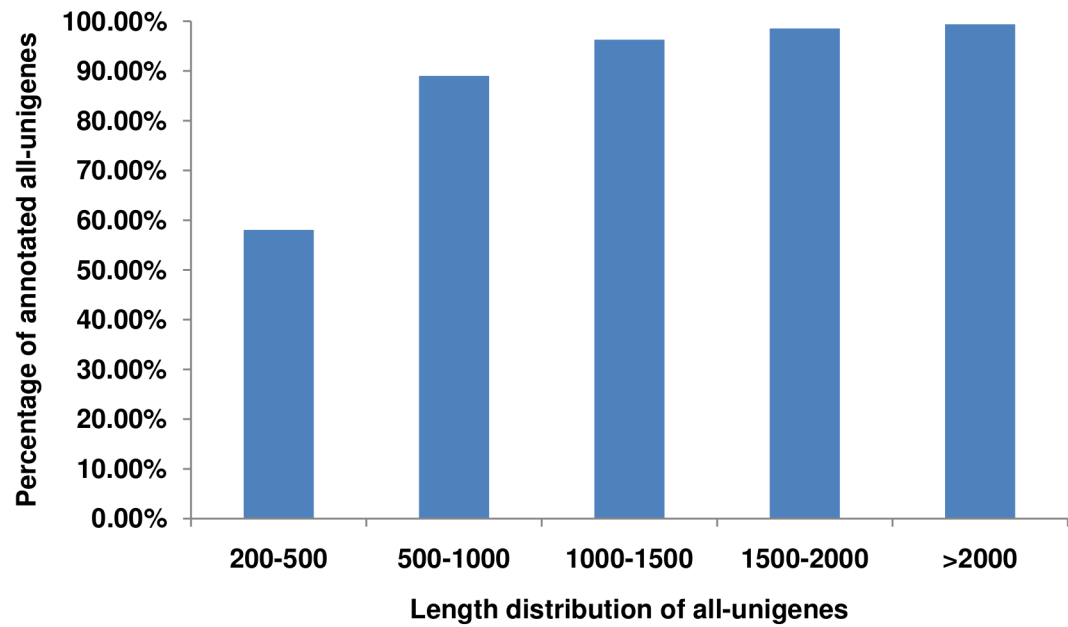

Supplement: f1 [file 467395.f1.zip]

# Additional file 12: Validation of DEGs by semi-qRT-PCR.

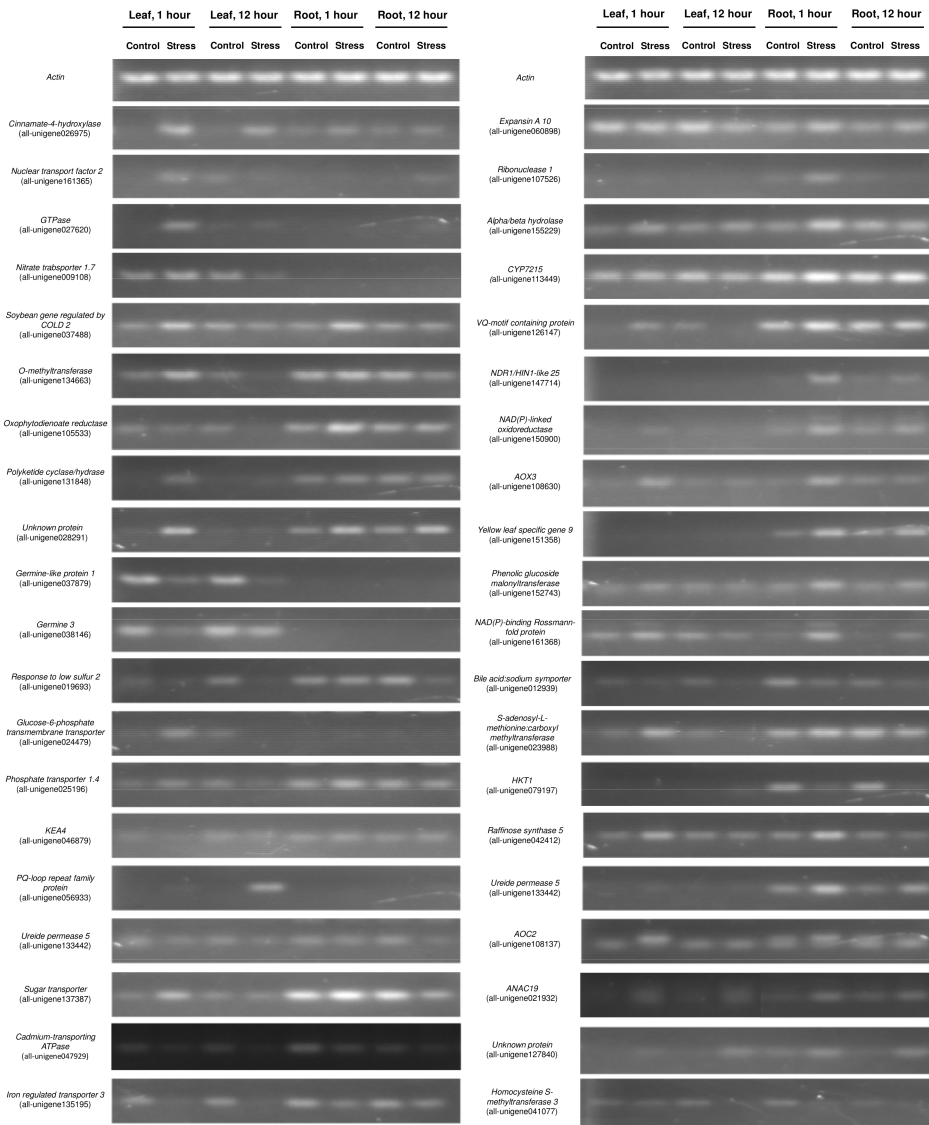

Supplement: f1 [file 467395.f1.zip]
